# Supplementary material for: Transcriptome analysis of Citrus Aurantium L. to study synephrine biosynthesis during developmental stages
Source: PeerJ. 2024 Sep 9;12:e17965. doi: 10.7717/peerj.17965 (PMC11391941; doi:10.7717/peerj.17965)
Supplement: Supplemental Information 1 [file peerj-12-17965-s001.xlsx]

## Sheet: Sheet1
2020						2021
Samples	Gather time	Samples	Peak value was determined by HPCE	y=410.87x-3.0689	Dilute 30 times（mg/g）	Gather time	Samples	Peak value was determined by HPCE	y=410.87x-3.0689	Dilute 30 times（mg/g）
C17-1	2020-05-18	C17-1-1	102.551	0.257063	7.7119	2021-05-27	C17-1-1	93.8786	0.235957	7.0787
		C17-1-2	100.618	0.25236	7.5708		C17-1-2	85.0353	0.214433	6.433
		C17-1-3	101.681	0.254947	7.64842		C17-1-3	84.8041	0.213871	6.41612
C17-2	2020-06-05	C17-2-1	83.4774	0.210641	6.31924	2021-06-09	C17-2-1	69.2994	0.176134	5.28403
		C17-2-2	78.9825	0.199702	5.99105		C17-2-2	69.9375	0.177687	5.33062
		C17-2-3	76.9182	0.194677	5.84032		C17-2-3	/	/	/
C17-3	2020-06-19	C17-3-1	34.8964	0.0924022	2.77207	2021-06-23	C17-3-1	40.9365	0.107103	3.21309
		C17-3-2	36.5078	0.0963242	2.88972		C17-3-2	50.7088	0.130887	3.92662
		C17-3-3	39.8231	0.104393	3.13179		C17-3-3	51.3512	0.132451	3.97353
C17-4	2020-07-05	C17-4-1	26.2961	0.0714704	2.14411	2021-07-06	C17-4-1	48.037	0.124385	3.73154
		C17-4-2	21.9844	0.0609763	1.82929		C17-4-2	41.4031	0.108238	3.24715
		C17-4-3	23.2033	0.0639428	1.91828		C17-4-3	48.923	0.126541	3.79623
C17-5	2020-07-19	C17-5-1	26.0894	0.0709673	2.12902	2021-07-21	C17-5-1	25.2506	0.0689256	2.06777
		C17-5-2	25.7991	0.0702606	2.10782		C17-5-2	23.7373	0.0652425	1.95728
		C17-5-3	27.4321	0.0742352	2.22706		C17-5-3	21.113	0.0588553	1.76566
C17-6	2020-08-05	C17-6-1	18.0354	0.0513649	1.54095	2021-08-06	C17-6-1	13.2459	0.039708	1.19124
		C17-6-2	19.0652	0.0538712	1.61614		C17-6-2	14.7143	0.0432818	1.29845
		C17-6-3	18.1029	0.0515293	1.54588		C17-6-3	14.1239	0.0418449	1.25535
C17-7	2020-08-16	C17-7-1	16.9204	0.0486511	1.45953	2021-08-19	C17-7-1	14.5243	0.0428194	1.28458
		C17-7-2	15.4679	0.0451159	1.35348		C17-7-2	13.6933	0.0407967	1.2239
		C17-7-3	17.8949	0.0510229	1.53069		C17-7-3	12.9078	0.038885	1.16655
C17-8	2020-09-05	C17-8-1	14.5243	0.0428194	1.28458	2021-09-07	C17-8-1	12.0178	0.0367188	1.10156
		C17-8-2	13.6933	0.0407967	1.2239		C17-8-2	13.7858	0.0410219	1.23066
		C17-8-3	12.9078	0.038885	1.16655		C17-8-3	13.9111	0.0413268	1.23981

## Sheet: Sheet2
diff_group	total DEG	up	down
C17_1_vs_C17_4	4819	1800	3019
C17_4_vs_C17_7	1995	1305	690
C17_1_vs_C17_7	5275	2534	2741
