# Supplementary material for: Transcriptome analysis of Citrus Aurantium L. to study synephrine biosynthesis during developmental stages
Source: PeerJ. 2024 Sep 9;12:e17965. doi: 10.7717/peerj.17965 (PMC11391941; doi:10.7717/peerj.17965)
Supplement: Supplemental Information 2 [file peerj-12-17965-s002.xls]

## Sheet: Raw data for Figure 7
Raw data for Figure 7
Ct
Sample Name	β-actin	aroA	ENO	aroG/F/H	TyDC1	TyDC2	TyDC3
C17_1	16.65	22.63	21.61	22.93	23.63	23.88	25.11
C17_1	15.9	21.96	21.03	23.23	22.44	23.88	24.11
C17_1	16.24	21.99	21.36	23.84	23.97	23.51	23.98
C17_1	17.69	23.14	22.78	24.4	23.73	24.87	26.05
C17_1	17.54	22.73	22.87	23.98	23.33	24.52	25.8
C17_1	17.62	23.21	23.12	23.64	23.68	25.15	25.78
C17_1	16.16	22.4	20.88	23.82	23.08	24.03	23.27
C17_1	16.72	22.45	21.53	23.76	22.48	24.94	23.93
C17_1	16.29	22.27	21.29	23.47	22.08	24.25	23.56
C17_4	15.87	22.77	21.9	23.68	26.7	26.06	26.93
C17_4	15.33	22.5	21.21	24.44	26.94	25.9	27.06
C17_4	16.09	23.11	22.08	23.96	26.7	26.03	27.65
C17_4	16.18	23.48	22.37	24.78	26.4	28.15	26.86
C17_4	16.6	23.57	22.51	25.52	26.44	28.33	28.47
C17_4	16.31	23.21	22.76	24.74	26.53	28	26.45
C17_4	17.9	24.73	23.76	25.13	26.34	27.56	28.94
C17_4	17.78	24.97	23.58	26.21	27.23	27.05	28.32
C17_4	17.68	24.82	23.23	25.68	26.05	26.97	28.23
C17_7	14.91	22.74	20.85	25.96	26.92	26.42	28.69
C17_7	15.16	23.09	20.77	26.07	26.83	26.36	27.78
C17_7	15.09	22.84	21.31	26.28	26.73	26.87	27.65
C17_7	16.57	24.11	22.85	27.21	26.34	26.31	29.72
C17_7	16.53	23.78	23.32	27.26	26.45	26.59	29.47
C17_7	16.85	24.31	23.02	27.14	26.09	26.25	29.45
C17_7	17.2	24.29	24.01	27.23	27.69	27.26	26.94
C17_7	17.04	23.98	23.67	26.78	27.47	27.83	27.6
C17_7	17.25	24.68	23.86	27.09	27.57	27.78	27.23
