# Supplementary material for: Transcriptome analysis of Citrus Aurantium L. to study synephrine biosynthesis during developmental stages
Source: PeerJ. 2024 Sep 9;12:e17965. doi: 10.7717/peerj.17965 (PMC11391941; doi:10.7717/peerj.17965)
Supplement: Supplemental Information 3 [file peerj-12-17965-s003.xlsx]

## Sheet: Table S1
Table S1 The RNA Agilent 2100 Bioanalyzer Assay Results of the Citrus aurantium.
Sample	Content（ng/ μL)	Total masss（μg)	OD260/ 280	RIN	28S/ 18S
C17-1-1	1185	35.55	2.08	8.8	1.4
C17-1-2	1270	38.1	2.07	8.7	1.5
C17-1-3	540	16.2	1.89	8.6	1.5
C17-4-1	45	0.9	2.06	7.8	1.4
C17-4-2	65	1.95	2.05	8.1	1
C17-4-3	31	0.62	2.04	8.1	1.4
C17-7-1	60	1.2	2.08	8	1.2
C17-7-2	34	0.68	2.07	7.9	1
C17-7-3	57	1.71	2.05	7.5	1

## Sheet: Table S2
Table S2 Quality control statistics of the sequencing data.
Sample Name	Clean Reads	Clean bases	Read length (bp)	Q20(%)	Q30(%)	GC(%)
C17-1-1	40409844	6052923937	150	97.69	93.53	43.77
C17-1-2	41068646	6151826420	150	97.81	93.79	43.84
C17-1-3	40898704	6126687125	150	97.87	93.96	43.89
C17-4-1	40961218	6135017719	150	97.74	93.62	44.06
C17-4-2	40907708	6126730562	150	97.75	93.64	44.12
C17-4-3	40919416	6128995135	150	97.8	93.81	44.17
C17-7-1	41300182	6186776698	150	97.87	94	44.81
C17-7-2	40393464	6050819344	150	97.92	94.12	44.35
C17-7-3	40311362	6038938539	150	97.77	93.73	44.25

## Sheet: Table S3
Table S3 All differentially expressed genes (DEGs) that compared among the different developmental stages.
Gene_id	C17_1_vs_C17_4	C17_4_vs_C17_7	C17_1_vs_C17_7	Sum
Cs_ont_2g012200	yes|down	no|up	yes|down	2
Cs_ont_2g009350	no|up	no|up	yes|up	1
Cs_ont_5g031730	no|down	no|down	yes|down	1
Cs_ont_4g022860	no|down	no|down	yes|down	1
Cs_ont_3g030430	no|up	no|up	yes|up	1
Cs_ont_8g005550	yes|up	no|down	no|up	1
Cs_ont_5g020960	no|up	yes|up	yes|up	2
Cs_ont_1g022690	yes|down	no|up	yes|down	2
Cs_ont_4g001570	yes|down	yes|up	no|down	2
Cs_ont_8g008120	yes|down	no|down	yes|down	2
Cs_ont_9g004830	yes|down	no|up	no|down	1
Cs_ont_1g002100	no|down	yes|up	no|up	1
Cs_ont_3g006350	yes|up	no|up	yes|up	2
Cs_ont_2g030260	yes|up	no|up	yes|up	2
Cs_ont_5g049980	yes|up	no|up	yes|up	2
Cs_ont_2g003350	yes|up	yes|up	yes|up	3
Cs_ont_3g009960	yes|down	yes|up	yes|down	3
Cs_ont_6g009510	yes|down	no|up	yes|down	2
Cs_ont_7g001870	yes|up	no|down	yes|up	2
Cs_ont_5g034550	no|up	no|up	yes|up	1
Cs_ont_4g018300	yes|up	no|no test	no|up	1
Cs_ont_6g013060	yes|up	no|up	yes|up	2
Cs_ont_3g017310	yes|up	no|up	yes|up	2
Cs_ont_3g013610	yes|up	yes|up	yes|up	3
Cs_ont_8g016370	yes|up	no|up	yes|up	2
Cs_ont_3g016040	yes|down	no|down	yes|down	2
Cs_ont_3g019060	yes|down	no|up	no|down	1
Cs_ont_5g029120	yes|up	no|down	no|up	1
Cs_ont_5g000050	no|down	yes|down	yes|down	2
Cs_ont_8g022460	yes|down	no|up	yes|down	2
Cs_ont_7g025280	yes|down	no|up	yes|down	2
Cs_ont_6g007160	yes|up	no|down	yes|up	2
Cs_ont_3g016260	yes|down	no|up	yes|down	2
Cs_ont_8g008780	yes|up	no|up	yes|up	2
Cs_ont_5g050040	yes|down	no|up	no|down	1
Cs_ont_2g009040	yes|down	no|down	yes|down	2
Cs_ont_6g009180	yes|up	no|down	no|down	1
Cs_ont_2g006090	yes|down	yes|up	no|up	2
Cs_ont_7g000230	yes|down	no|up	no|down	1
Cs_ont_9g008330	yes|up	no|up	yes|up	2
Cs_ont_5g039890	no|up	no|up	yes|up	1
Cs_ont_8g026420	yes|down	no|down	yes|down	2
Cs_ont_1g018900	yes|up	no|down	no|up	1
Cs_ont_5g019880	yes|down	no|up	yes|down	2
Cs_ont_7g004930	yes|down	no|up	no|down	1
Cs_ont_2g004830	no|down	no|down	yes|down	1
Cs_ont_1g025970	no|up	yes|up	yes|up	2
Cs_ont_9g006780	yes|down	yes|up	yes|down	3
Cs_ont_8g008870	yes|down	yes|down	yes|down	3
Cs_ont_7g019820	yes|down	yes|up	no|down	2
Cs_ont_2g035630	no|up	yes|up	yes|up	2
Cs_ont_1g019360	yes|up	yes|down	no|up	2
Cs_ont_5g011990	no|up	yes|up	yes|up	2
Cs_ont_5g005660	yes|down	yes|up	no|down	2
Cs_ont_5g011440	yes|up	no|down	yes|up	2
Cs_ont_2g018110	yes|down	no|up	no|down	1
Cs_ont_7g000050	yes|up	no|up	yes|up	2
Cs_ont_1g006680	yes|down	yes|down	yes|down	3
Cs_ont_7g027720	yes|down	no|up	yes|down	2
Cs_ont_4g007160	yes|up	no|down	yes|up	2
Cs_ont_2g002940	yes|up	no|up	yes|up	2
Cs_ont_2g035040	yes|up	no|up	yes|up	2
Cs_ont_6g000200	yes|up	no|up	no|up	1
Cs_ont_7g023610	no|up	no|up	yes|up	1
Cs_ont_3g002500	no|up	no|up	yes|up	1
Cs_ont_4g015190	no|up	yes|up	yes|up	2
Cs_ont_7g019170	no|up	yes|down	yes|down	2
Cs_ont_3g007260	no|up	no|up	yes|up	1
Cs_ont_5g037290	yes|down	no|up	no|down	1
Cs_ont_5g044970	yes|down	no|up	no|down	1
Cs_ont_3g011060	yes|down	no|up	no|down	1
Cs_ont_3g018080	yes|down	no|down	yes|down	2
Cs_ont_2g027370	yes|down	no|up	yes|down	2
Cs_ont_2g031810	yes|down	no|down	yes|down	2
Cs_ont_4g012930	yes|up	no|down	no|up	1
Cs_ont_3g022350	yes|down	no|down	yes|down	2
Cs_ont_5g045510	no|up	no|up	yes|up	1
Cs_ont_8g006200	yes|up	no|up	yes|up	2
Cs_ont_1g007080	no|up	no|up	yes|up	1
Cs_ont_5g041980	yes|down	no|up	yes|down	2
Cs_ont_5g041230	yes|down	no|up	no|down	1
Cs_ont_1g013900	yes|up	no|up	yes|up	2
Cs_ont_8g028170	no|down	no|down	yes|down	1
Cs_ont_5g008470	yes|down	no|up	yes|down	2
Cs_ont_9g026310	yes|up	no|up	yes|up	2
Cs_ont_2g004490	no|down	no|down	yes|down	1
Cs_ont_9g002780	yes|down	no|up	no|down	1
Cs_ont_8g027550	no|up	yes|up	yes|up	2
Cs_ont_7g002750	yes|up	no|down	yes|up	2
Cs_ont_7g012200	yes|up	no|up	yes|up	2
Cs_ont_5g039380	yes|down	no|up	yes|down	2
Cs_ont_1g015420	yes|down	no|down	yes|down	2
Cs_ont_7g016910	yes|down	yes|up	yes|down	3
Cs_ont_4g026800	yes|down	no|up	no|up	1
Cs_ont_6g006780	no|down	yes|down	yes|down	2
Cs_ont_9g001780	yes|down	yes|up	no|down	2
Cs_ont_8g020280	yes|down	no|down	yes|down	2
Cs_ont_6g011740	yes|down	no|down	yes|down	2
Cs_ont_6g015590	yes|down	no|up	no|down	1
Cs_ont_3g004330	yes|down	no|down	yes|down	2
Cs_ont_2g013340	no|down	yes|up	no|up	1
Cs_ont_6g003250	yes|down	no|up	yes|down	2
Cs_ont_7g026930	no|up	yes|up	yes|up	2
Cs_ont_8g001000	yes|down	yes|up	no|up	2
Cs_ont_5g049150	no|down	yes|down	yes|down	2
Cs_ont_8g027770	yes|down	no|up	yes|down	2
Cs_ont_1g022750	yes|down	yes|up	no|down	2
Cs_ont_8g004780	yes|down	yes|down	yes|down	3
Cs_ont_7g025700	yes|down	no|up	yes|down	2
Cs_ont_3g020210	yes|down	yes|up	no|down	2
Cs_ont_Un001000	yes|up	yes|up	yes|up	3
Cs_ont_5g042760	yes|down	yes|up	no|down	2
Cs_ont_4g002480	no|down	no|down	yes|down	1
Cs_ont_6g019790	no|up	no|up	yes|up	1
Cs_ont_3g030330	no|up	no|up	yes|up	1
Cs_ont_8g005960	no|down	yes|down	yes|down	2
Cs_ont_3g010880	yes|down	no|down	yes|down	2
Cs_ont_4g000760	yes|down	no|down	yes|down	2
Cs_ont_8g004560	no|up	no|up	yes|up	1
Cs_ont_2g011940	yes|up	yes|down	yes|down	3
Cs_ont_6g017990	yes|down	no|down	yes|down	2
Cs_ont_8g000450	yes|down	no|up	yes|down	2
Cs_ont_4g016500	yes|down	no|up	no|down	1
Cs_ont_2g035600	no|down	yes|down	yes|down	2
Cs_ont_9g006410	yes|up	yes|up	yes|up	3
Cs_ont_5g009120	yes|down	yes|up	yes|up	3
Cs_ont_9g027190	yes|down	no|up	no|down	1
Cs_ont_3g006500	yes|up	no|up	yes|up	2
Cs_ont_9g011990	no|down	no|down	yes|down	1
Cs_ont_6g016240	yes|down	no|up	no|down	1
Cs_ont_9g002520	no|down	no|down	yes|down	1
Cs_ont_4g004080	no|down	no|down	yes|down	1
Cs_ont_1g016350	no|down	no|down	yes|down	1
Cs_ont_1g010810	yes|down	yes|down	yes|down	3
Cs_ont_6g018350	yes|down	no|up	yes|down	2
Cs_ont_4g022690	yes|up	no|down	yes|up	2
Cs_ont_4g019220	no|down	no|down	yes|down	1
Cs_ont_8g023700	no|up	no|up	yes|up	1
Cs_ont_8g023250	no|up	yes|up	yes|up	2
Cs_ont_7g001390	no|down	yes|down	yes|down	2
Cs_ont_8g001910	yes|up	no|down	no|up	1
Cs_ont_9g027990	yes|up	no|down	no|up	1
Cs_ont_9g017730	yes|up	yes|down	no|up	2
Cs_ont_7g021110	yes|up	no|down	no|up	1
Cs_ont_9g003900	no|down	no|down	yes|down	1
Cs_ont_5g024520	yes|up	no|up	yes|up	2
Cs_ont_6g016020	yes|down	no|up	yes|down	2
Cs_ont_2g019190	yes|down	no|up	no|down	1
Cs_ont_7g022130	no|up	no|up	yes|up	1
Cs_ont_7g024050	no|up	no|up	yes|up	1
Cs_ont_9g014270	yes|up	no|down	yes|up	2
Cs_ont_5g040600	yes|down	yes|up	no|down	2
Cs_ont_1g026990	no|up	no|up	yes|up	1
Cs_ont_5g028420	yes|down	no|up	yes|down	2
Cs_ont_9g010960	yes|down	yes|up	no|down	2
Cs_ont_5g004780	yes|up	no|up	yes|up	2
Cs_ont_8g019030	yes|down	no|up	no|down	1
Cs_ont_3g016900	no|up	no|up	yes|up	1
Cs_ont_3g012480	no|up	no|up	yes|up	1
Cs_ont_1g017590	no|down	no|down	yes|down	1
Cs_ont_5g005920	no|up	no|up	yes|up	1
Cs_ont_3g022100	yes|down	no|up	yes|down	2
Cs_ont_1g018570	no|up	no|up	yes|up	1
Cs_ont_4g007280	yes|down	no|down	yes|down	2
Cs_ont_9g025590	yes|down	no|down	yes|down	2
Cs_ont_5g004250	yes|down	no|up	yes|down	2
Cs_ont_5g048050	yes|up	no|down	yes|up	2
Cs_ont_3g030920	yes|down	no|up	no|down	1
Cs_ont_8g019290	yes|down	yes|up	no|no test	2
Cs_ont_5g034400	yes|down	no|up	yes|down	2
Cs_ont_6g006190	yes|up	no|down	no|up	1
Cs_ont_5g029590	yes|up	no|up	yes|up	2
Cs_ont_1g005810	yes|up	no|up	yes|up	2
Cs_ont_3g027880	no|up	yes|up	yes|up	2
Cs_ont_1g019190	yes|down	yes|up	yes|up	3
Cs_ont_8g022070	yes|down	no|up	yes|down	2
Cs_ont_2g006390	yes|down	no|down	yes|down	2
Cs_ont_7g007630	yes|down	no|up	no|down	1
Cs_ont_6g021900	no|up	no|up	yes|up	1
Cs_ont_2g034230	yes|down	yes|up	yes|down	3
Cs_ont_5g010470	no|down	no|down	yes|down	1
Cs_ont_7g023260	no|down	no|down	yes|down	1
Cs_ont_5g014360	no|down	no|down	yes|down	1
Cs_ont_7g020400	no|up	no|up	yes|up	1
Cs_ont_3g012950	no|down	no|up	yes|up	1
Cs_ont_8g002170	yes|down	no|up	yes|down	2
Cs_ont_4g005600	no|down	no|up	yes|up	1
Cs_ont_3g003020	yes|down	no|up	no|down	1
Cs_ont_3g011270	no|up	yes|up	yes|up	2
Cs_ont_5g042970	yes|down	no|up	no|down	1
Cs_ont_6g001610	yes|up	no|up	yes|up	2
Cs_ont_4g025420	no|down	no|down	yes|down	1
Cs_ont_2g026560	no|up	no|up	yes|up	1
Cs_ont_5g026640	yes|down	no|down	yes|down	2
Cs_ont_3g023500	no|down	no|down	yes|down	1
Cs_ont_7g014180	yes|down	no|down	yes|down	2
Cs_ont_3g032430	yes|up	no|down	no|up	1
Cs_ont_4g006620	yes|up	no|up	yes|up	2
Cs_ont_2g018370	yes|up	no|up	yes|up	2
Cs_ont_7g026720	yes|down	no|up	yes|down	2
Cs_ont_6g009630	yes|down	no|up	no|up	1
Cs_ont_5g011870	yes|down	no|up	no|down	1
Cs_ont_2g020670	yes|down	no|up	yes|down	2
Cs_ont_4g003050	yes|down	no|down	no|down	1
Cs_ont_1g006540	yes|down	no|up	no|down	1
Cs_ont_4g011310	yes|down	no|up	yes|down	2
Cs_ont_5g032520	yes|up	no|up	yes|up	2
Cs_ont_6g004260	yes|down	no|up	no|up	1
Cs_ont_1g009250	yes|up	yes|up	yes|up	3
Cs_ont_5g007780	no|down	no|down	yes|down	1
Cs_ont_2g004020	yes|up	no|up	yes|up	2
Cs_ont_4g016690	yes|up	no|up	yes|up	2
Cs_ont_7g019580	no|up	no|up	yes|up	1
Cs_ont_4g023310	yes|up	yes|up	yes|up	3
Cs_ont_8g005720	yes|down	yes|up	no|down	2
Cs_ont_1g023250	yes|up	no|down	no|down	1
Cs_ont_3g004270	yes|down	no|up	yes|down	2
Cs_ont_Un006130	yes|up	no|down	no|up	1
Cs_ont_4g022990	yes|up	no|up	yes|up	2
Cs_ont_4g018510	yes|down	no|up	yes|down	2
Cs_ont_9g001440	no|down	no|down	yes|down	1
Cs_ont_8g020610	no|up	no|up	yes|up	1
Cs_ont_9g020160	yes|down	no|up	no|down	1
Cs_ont_8g020340	yes|down	no|up	yes|down	2
Cs_ont_1g028200	yes|down	no|down	yes|down	2
Cs_ont_3g008950	no|down	yes|down	yes|down	2
Cs_ont_9g002060	no|down	yes|up	yes|up	2
Cs_ont_Un004860	yes|down	no|up	no|down	1
Cs_ont_5g001200	no|down	yes|down	yes|down	2
Cs_ont_6g022810	yes|down	no|down	yes|down	2
Cs_ont_3g004090	yes|down	yes|down	yes|down	3
Cs_ont_6g008020	yes|up	yes|up	yes|up	3
Cs_ont_3g001310	yes|down	yes|up	no|up	2
Cs_ont_6g015900	yes|down	no|up	yes|down	2
Cs_ont_3g005320	yes|up	no|down	no|up	1
Cs_ont_8g015650	yes|down	no|up	no|down	1
Cs_ont_5g046450	yes|up	no|down	yes|up	2
Cs_ont_1g002630	no|up	no|up	yes|up	1
Cs_ont_7g024640	yes|up	no|up	yes|up	2
Cs_ont_5g037710	yes|up	no|down	no|up	1
Cs_ont_2g000630	yes|up	no|up	yes|up	2
Cs_ont_6g016900	no|down	no|down	yes|down	1
Cs_ont_3g014350	no|down	no|down	yes|down	1
Cs_ont_8g009250	yes|down	no|down	yes|down	2
Cs_ont_5g004800	yes|down	no|up	no|down	1
Cs_ont_7g016580	yes|up	no|up	yes|up	2
Cs_ont_4g016990	yes|down	no|up	no|down	1
Cs_ont_5g043390	yes|down	no|down	yes|down	2
Cs_ont_3g030100	no|down	no|down	yes|down	1
Cs_ont_3g022640	yes|down	no|down	yes|down	2
Cs_ont_9g020330	yes|down	no|up	no|down	1
Cs_ont_4g005540	yes|down	no|down	yes|down	2
Cs_ont_1g017740	yes|up	yes|up	yes|up	3
Cs_ont_4g017020	yes|down	no|up	no|down	1
Cs_ont_4g023860	no|down	no|down	yes|down	1
Cs_ont_9g007130	yes|up	no|up	yes|up	2
Cs_ont_2g008820	yes|down	no|down	yes|down	2
Cs_ont_7g012070	yes|up	no|down	no|up	1
Cs_ont_8g004990	yes|down	no|up	no|down	1
Cs_ont_3g020680	yes|down	no|up	yes|down	2
Cs_ont_9g003330	no|down	no|down	yes|down	1
Cs_ont_7g016760	no|down	no|down	yes|down	1
Cs_ont_7g020180	yes|down	no|down	yes|down	2
Cs_ont_4g001590	yes|down	no|up	yes|down	2
Cs_ont_7g006040	yes|up	no|up	yes|up	2
Cs_ont_1g021120	no|down	no|down	yes|down	1
Cs_ont_9g015040	no|down	yes|up	yes|up	2
Cs_ont_3g009940	yes|up	no|up	yes|up	2
Cs_ont_2g029030	no|down	yes|up	yes|up	2
Cs_ont_2g020070	no|up	yes|up	yes|up	2
Cs_ont_7g001890	yes|down	no|up	no|down	1
Cs_ont_3g031850	yes|down	yes|up	no|up	2
Cs_ont_5g040850	no|down	no|down	yes|down	1
Cs_ont_7g020980	yes|down	yes|up	no|up	2
Cs_ont_5g023940	yes|down	no|down	yes|down	2
Cs_ont_5g023760	yes|down	no|up	yes|down	2
Cs_ont_2g024970	no|up	no|up	yes|up	1
Cs_ont_2g020480	no|up	no|up	yes|up	1
Cs_ont_3g019730	yes|down	no|up	no|down	1
Cs_ont_5g011190	no|down	yes|down	yes|down	2
Cs_ont_7g021630	yes|down	no|down	yes|down	2
Cs_ont_6g002730	no|up	yes|up	yes|up	2
Cs_ont_2g013130	no|down	no|down	yes|down	1
Cs_ont_6g016760	yes|up	yes|up	yes|up	3
Cs_ont_5g047490	yes|down	no|up	no|down	1
Cs_ont_8g022440	no|down	no|down	yes|down	1
Cs_ont_8g004220	no|up	yes|down	yes|down	2
Cs_ont_4g004410	no|down	yes|down	yes|down	2
Cs_ont_4g020590	yes|down	no|up	no|down	1
Cs_ont_2g016740	yes|down	no|up	no|down	1
Cs_ont_5g008280	yes|down	no|up	no|down	1
Cs_ont_3g002180	yes|down	yes|up	no|down	2
Cs_ont_4g014220	no|up	no|up	yes|up	1
Cs_ont_5g007200	yes|down	yes|up	yes|up	3
Cs_ont_3g017190	no|down	yes|up	no|up	1
Cs_ont_2g012080	yes|down	no|up	no|down	1
Cs_ont_4g013250	yes|down	no|down	yes|down	2
Cs_ont_1g011620	no|up	no|up	yes|up	1
Cs_ont_9g022270	yes|down	yes|up	yes|up	3
Cs_ont_9g022900	yes|down	no|up	no|down	1
Cs_ont_1g000780	yes|down	no|up	no|down	1
Cs_ont_3g025480	yes|up	no|down	no|up	1
Cs_ont_9g008310	yes|down	yes|down	yes|down	3
Cs_ont_1g026310	yes|down	yes|down	yes|down	3
Cs_ont_5g017950	no|down	no|down	yes|down	1
Cs_ont_7g023980	no|up	yes|up	yes|up	2
Cs_ont_8g023060	yes|down	no|up	yes|down	2
Cs_ont_8g016350	yes|down	no|down	yes|down	2
Cs_ont_7g019800	yes|down	no|up	no|down	1
Cs_ont_1g019380	yes|up	yes|down	no|down	2
Cs_ont_2g009390	yes|down	no|down	yes|down	2
Cs_ont_2g034500	no|up	no|up	yes|up	1
Cs_ont_2g032650	yes|down	yes|up	no|up	2
Cs_ont_4g008350	no|up	no|up	yes|up	1
Cs_ont_7g027740	no|down	yes|up	yes|up	2
Cs_ont_1g009160	yes|down	no|up	no|down	1
Cs_ont_6g020240	yes|up	no|down	no|up	1
Cs_ont_7g023670	no|down	yes|up	yes|up	2
Cs_ont_3g002520	yes|down	no|down	yes|down	2
Cs_ont_3g002030	yes|up	no|down	no|up	1
Cs_ont_4g010460	no|down	no|down	yes|down	1
Cs_ont_9g018490	yes|up	no|down	no|up	1
Cs_ont_8g012850	yes|down	no|up	no|down	1
Cs_ont_8g022060	no|up	yes|up	yes|up	2
Cs_ont_7g002630	yes|down	no|down	yes|down	2
Cs_ont_7g027600	yes|down	no|up	no|up	1
Cs_ont_2g002280	no|down	no|down	yes|down	1
Cs_ont_5g032730	yes|up	no|up	yes|up	2
Cs_ont_1g015070	yes|down	yes|up	no|up	2
Cs_ont_5g038740	no|down	no|down	yes|down	1
Cs_ont_2g004700	yes|down	no|down	yes|down	2
Cs_ont_8g008850	yes|down	no|up	yes|down	2
Cs_ont_4g012330	yes|up	no|up	yes|up	2
Cs_ont_2g000020	yes|down	no|up	no|down	1
Cs_ont_5g033020	yes|down	no|up	no|down	1
Cs_ont_1g005550	no|up	yes|up	yes|up	2
Cs_ont_3g004810	yes|down	no|up	no|down	1
Cs_ont_4g003260	yes|up	no|up	yes|up	2
Cs_ont_6g014190	yes|down	no|down	yes|down	2
Cs_ont_8g028150	no|up	yes|down	yes|down	2
Cs_ont_9g016890	yes|up	no|down	no|up	1
Cs_ont_8g028600	yes|down	no|up	yes|down	2
Cs_ont_4g002240	yes|down	no|up	no|down	1
Cs_ont_5g008320	yes|down	no|down	yes|down	2
Cs_ont_9g026370	no|up	no|up	yes|up	1
Cs_ont_1g027780	no|down	no|down	yes|down	1
Cs_ont_8g024070	yes|up	no|up	yes|up	2
Cs_ont_3g003920	no|up	no|up	yes|up	1
Cs_ont_4g023450	yes|up	no|up	yes|up	2
Cs_ont_3g009430	yes|up	no|up	yes|up	2
Cs_ont_3g007480	yes|down	no|down	yes|down	2
Cs_ont_6g014990	no|up	yes|up	yes|up	2
Cs_ont_2g006890	no|down	yes|up	no|up	1
Cs_ont_1g010160	no|down	yes|up	no|up	1
Cs_ont_5g045390	yes|down	yes|down	yes|down	3
Cs_ont_7g016970	yes|down	no|down	yes|down	2
Cs_ont_6g004670	yes|up	no|up	yes|up	2
Cs_ont_6g019260	no|down	yes|up	no|up	1
Cs_ont_9g001050	no|up	yes|up	yes|up	2
Cs_ont_6g015020	no|down	no|down	yes|down	1
Cs_ont_5g008130	no|up	no|up	yes|up	1
Cs_ont_7g017050	yes|down	yes|up	no|down	2
Cs_ont_8g004760	yes|down	no|down	yes|down	2
Cs_ont_8g000880	no|up	no|up	yes|up	1
Cs_ont_5g039500	no|up	no|up	yes|up	1
Cs_ont_3g019890	yes|down	no|up	yes|down	2
Cs_ont_9g028620	no|down	no|down	yes|down	1
Cs_ont_1g020870	no|down	no|down	yes|down	1
Cs_ont_2g010560	yes|up	no|up	yes|up	2
Cs_ont_5g003230	yes|up	no|up	yes|up	2
Cs_ont_2g008680	no|down	no|down	yes|down	1
Cs_ont_7g016390	no|down	yes|up	yes|up	2
Cs_ont_5g012470	no|up	yes|up	yes|up	2
Cs_ont_2g024780	no|up	yes|down	yes|down	2
Cs_ont_Un005300	yes|down	no|up	no|down	1
Cs_ont_2g035660	yes|down	no|down	yes|down	2
Cs_ont_7g006210	no|down	no|down	yes|down	1
Cs_ont_5g016560	no|up	no|up	yes|up	1
Cs_ont_3g006520	yes|up	no|up	yes|up	2
Cs_ont_6g008130	yes|up	no|down	no|up	1
Cs_ont_7g029160	no|up	yes|up	yes|up	2
Cs_ont_1g016400	yes|down	no|up	no|down	1
Cs_ont_1g010830	yes|down	yes|up	no|down	2
Cs_ont_4g026350	yes|down	no|up	yes|down	2
Cs_ont_5g040440	no|up	no|up	yes|up	1
Cs_ont_4g026420	yes|down	no|up	no|down	1
Cs_ont_6g025150	no|up	yes|up	yes|up	2
Cs_ont_7g015280	yes|down	no|down	yes|down	2
Cs_ont_5g028190	yes|up	yes|up	yes|up	3
Cs_ont_1g029150	yes|down	yes|up	no|up	2
Cs_ont_7g006510	no|down	no|down	yes|down	1
Cs_ont_8g004710	no|up	no|up	yes|up	1
Cs_ont_6g016590	no|down	yes|up	yes|up	2
Cs_ont_6g012090	yes|down	yes|up	no|down	2
Cs_ont_7g029290	yes|up	no|up	yes|up	2
Cs_ont_6g017310	yes|up	no|down	yes|up	2
Cs_ont_8g011410	no|up	no|up	yes|up	1
Cs_ont_7g027190	yes|up	yes|down	no|down	2
Cs_ont_8g011140	no|up	no|up	yes|up	1
Cs_ont_3g017070	yes|down	no|down	yes|down	2
Cs_ont_5g040620	yes|down	no|up	yes|down	2
Cs_ont_6g007590	no|down	yes|up	yes|up	2
Cs_ont_6g020520	yes|up	no|down	no|down	1
Cs_ont_2g025620	yes|up	no|up	yes|up	2
Cs_ont_3g002200	yes|down	yes|up	yes|down	3
Cs_ont_1g007840	yes|up	no|down	no|up	1
Cs_ont_6g006350	yes|up	no|down	yes|up	2
Cs_ont_1g012090	yes|down	no|up	yes|down	2
Cs_ont_7g014880	yes|up	yes|up	yes|up	3
Cs_ont_5g016380	no|up	no|up	yes|up	1
Cs_ont_7g013700	yes|up	no|down	yes|up	2
Cs_ont_4g017920	yes|up	no|down	no|up	1
Cs_ont_6g012890	no|up	no|up	yes|up	1
Cs_ont_2g019240	yes|up	no|up	yes|up	2
Cs_ont_1g019970	yes|up	no|up	yes|up	2
Cs_ont_7g007030	yes|down	yes|up	yes|up	3
Cs_ont_7g001930	yes|up	no|up	yes|up	2
Cs_ont_1g018550	yes|up	no|down	yes|up	2
Cs_ont_1g024490	yes|up	no|up	yes|up	2
Cs_ont_1g024020	yes|up	no|up	yes|up	2
Cs_ont_8g023980	no|up	yes|up	yes|up	2
Cs_ont_1g012540	yes|down	yes|down	yes|down	3
Cs_ont_2g030900	yes|down	no|up	no|down	1
Cs_ont_9g007680	yes|down	no|up	no|down	1
Cs_ont_7g012870	no|down	no|down	yes|down	1
Cs_ont_9g011010	yes|down	no|up	no|down	1
Cs_ont_2g034210	no|down	yes|up	no|up	1
Cs_ont_7g022110	yes|up	yes|up	yes|up	3
Cs_ont_7g025320	yes|down	no|down	yes|down	2
Cs_ont_5g025100	no|up	no|up	yes|up	1
Cs_ont_2g002610	no|up	yes|up	yes|up	2
Cs_ont_7g028400	yes|down	no|up	no|down	1
Cs_ont_6g020380	yes|down	no|up	no|down	1
Cs_ont_6g024600	no|up	no|up	yes|up	1
Cs_ont_5g026480	yes|down	no|down	yes|down	2
Cs_ont_9g013700	yes|down	no|up	no|down	1
Cs_ont_9g018530	yes|down	yes|down	yes|down	3
Cs_ont_6g023870	yes|up	no|up	yes|up	2
Cs_ont_3g003550	yes|up	no|up	yes|up	2
Cs_ont_8g017810	yes|down	no|up	no|down	1
Cs_ont_6g001360	yes|up	no|up	yes|up	2
Cs_ont_9g013280	no|down	no|down	yes|down	1
Cs_ont_3g022160	no|down	yes|up	yes|up	2
Cs_ont_4g025440	yes|down	no|up	no|down	1
Cs_ont_6g004060	no|down	yes|down	yes|down	2
Cs_ont_8g006900	no|down	yes|up	no|up	1
Cs_ont_6g000540	yes|up	no|up	yes|up	2
Cs_ont_8g012440	yes|up	no|up	yes|up	2
Cs_ont_5g034280	no|down	no|down	yes|down	1
Cs_ont_3g027410	yes|down	yes|up	no|down	2
Cs_ont_7g026740	yes|up	no|up	yes|up	2
Cs_ont_5g050300	no|down	no|down	yes|down	1
Cs_ont_6g015720	yes|down	no|down	yes|down	2
Cs_ont_2g006910	no|down	no|down	yes|down	1
Cs_ont_6g009390	yes|down	no|down	yes|down	2
Cs_ont_4g012830	no|down	yes|up	no|up	1
Cs_ont_4g020010	yes|down	no|down	yes|down	2
Cs_ont_6g005190	yes|down	no|up	no|down	1
Cs_ont_9g008100	yes|down	no|down	yes|down	2
Cs_ont_4g014780	yes|down	yes|up	no|up	2
Cs_ont_8g021230	yes|down	yes|up	no|no test	2
Cs_ont_8g025200	no|up	yes|up	yes|up	2
Cs_ont_4g015430	no|down	no|down	yes|down	1
Cs_ont_8g020180	yes|down	no|down	yes|down	2
Cs_ont_2g004040	no|up	no|up	yes|up	1
Cs_ont_2g004510	no|down	no|down	yes|down	1
Cs_ont_8g002730	no|up	no|up	yes|up	1
Cs_ont_7g005300	no|down	no|down	yes|down	1
Cs_ont_9g009470	no|down	yes|down	yes|down	2
Cs_ont_9g022440	no|up	no|up	yes|up	1
Cs_ont_7g013050	yes|up	no|up	yes|up	2
Cs_ont_7g024210	yes|down	yes|up	no|down	2
Cs_ont_1g011170	yes|down	no|up	no|down	1
Cs_ont_7g017960	no|down	no|down	yes|down	1
Cs_ont_6g001940	yes|down	yes|up	yes|down	3
Cs_ont_5g025810	yes|down	yes|up	yes|up	3
Cs_ont_2g031990	yes|down	no|up	no|down	1
Cs_ont_3g009330	yes|up	no|up	yes|up	2
Cs_ont_6g002330	yes|down	no|up	yes|down	2
Cs_ont_3g005120	yes|up	no|down	no|up	1
Cs_ont_3g005690	no|down	yes|down	yes|down	2
Cs_ont_9g025710	yes|down	no|up	yes|down	2
Cs_ont_6g023120	no|up	no|up	yes|up	1
Cs_ont_3g024780	no|down	no|down	yes|down	1
Cs_ont_5g041370	yes|up	no|down	yes|up	2
Cs_ont_4g017490	no|down	yes|down	yes|down	2
Cs_ont_9g014530	no|up	no|up	yes|up	1
Cs_ont_5g003490	yes|down	no|up	yes|down	2
Cs_ont_9g006990	yes|down	no|up	no|down	1
Cs_ont_2g029700	no|up	no|up	yes|up	1
Cs_ont_5g045250	yes|up	no|down	no|up	1
Cs_ont_3g026320	yes|up	no|down	no|up	1
Cs_ont_5g045700	yes|down	yes|up	no|up	2
Cs_ont_6g004240	yes|down	no|up	yes|down	2
Cs_ont_5g008840	yes|down	no|up	no|down	1
Cs_ont_3g005340	yes|down	no|up	yes|down	2
Cs_ont_5g046470	yes|down	no|down	yes|down	2
Cs_ont_6g003730	no|down	yes|up	yes|up	2
Cs_ont_2g021270	yes|down	no|up	yes|down	2
Cs_ont_2g015450	no|up	no|up	yes|up	1
Cs_ont_8g001540	yes|down	no|down	yes|down	2
Cs_ont_5g002080	no|down	yes|up	yes|up	2
Cs_ont_5g013240	yes|up	no|up	yes|up	2
Cs_ont_7g002300	yes|up	no|down	no|up	1
Cs_ont_2g019740	yes|down	no|up	yes|down	2
Cs_ont_1g008900	yes|up	no|up	yes|up	2
Cs_ont_3g014400	yes|down	no|up	yes|down	2
Cs_ont_8g009270	no|down	no|down	yes|down	1
Cs_ont_3g009590	yes|down	no|up	no|down	1
Cs_ont_2g017960	yes|down	yes|up	no|down	2
Cs_ont_3g016380	no|up	no|up	yes|up	1
Cs_ont_7g016560	yes|up	no|up	yes|up	2
Cs_ont_4g002030	yes|down	yes|up	no|down	2
Cs_ont_6g025430	yes|down	no|down	no|down	1
Cs_ont_5g031770	yes|down	yes|up	no|down	2
Cs_ont_3g030470	yes|down	no|up	no|down	1
Cs_ont_4g021620	yes|up	yes|up	yes|up	3
Cs_ont_4g005560	no|up	no|up	yes|up	1
Cs_ont_9g020600	yes|up	no|up	yes|up	2
Cs_ont_2g010600	yes|down	yes|down	yes|down	3
Cs_ont_1g022650	yes|down	yes|down	yes|down	3
Cs_ont_1g029680	yes|down	no|up	yes|down	2
Cs_ont_4g023840	yes|down	no|up	yes|down	2
Cs_ont_6g022520	yes|up	yes|up	yes|up	3
Cs_ont_9g007110	yes|down	no|up	yes|down	2
Cs_ont_2g008510	yes|down	no|up	yes|down	2
Cs_ont_9g011830	yes|up	no|down	yes|up	2
Cs_ont_2g026790	no|up	no|up	yes|up	1
Cs_ont_5g042390	no|up	no|up	yes|up	1
Cs_ont_6g025380	no|down	yes|down	yes|down	2
Cs_ont_1g020500	yes|down	no|up	yes|down	2
Cs_ont_5g027420	no|up	yes|up	yes|up	2
Cs_ont_7g006020	no|up	no|up	yes|up	1
Cs_ont_7g011280	yes|up	no|up	yes|up	2
Cs_ont_2g025570	yes|up	no|up	yes|up	2
Cs_ont_6g009800	yes|down	no|up	yes|down	2
Cs_ont_9g024290	yes|up	no|up	yes|up	2
Cs_ont_9g016670	yes|down	yes|up	no|up	2
Cs_ont_3g020550	yes|down	no|down	yes|down	2
Cs_ont_2g007340	no|up	no|up	yes|up	1
Cs_ont_5g007590	no|down	yes|up	yes|up	2
Cs_ont_9g013880	no|down	yes|up	yes|up	2
Cs_ont_9g023950	yes|down	yes|up	no|down	2
Cs_ont_6g007740	yes|up	no|up	yes|up	2
Cs_ont_5g023740	no|down	no|down	yes|down	1
Cs_ont_2g024990	yes|down	no|up	yes|down	2
Cs_ont_6g002710	yes|down	no|up	no|down	1
Cs_ont_8g002810	yes|down	yes|down	yes|down	3
Cs_ont_5g017440	yes|down	no|up	no|down	1
Cs_ont_6g016780	yes|up	no|up	yes|up	2
Cs_ont_8g010950	no|down	no|down	yes|down	1
Cs_ont_2g015140	no|up	no|up	yes|up	1
Cs_ont_5g022670	yes|down	no|up	no|up	1
Cs_ont_1g024880	yes|down	yes|up	no|down	2
Cs_ont_9g021550	no|down	no|down	yes|down	1
Cs_ont_1g003350	yes|up	no|up	yes|up	2
Cs_ont_5g035250	yes|up	no|down	yes|up	2
Cs_ont_6g007120	yes|down	yes|up	no|up	2
Cs_ont_7g006530	yes|up	yes|up	yes|up	3
Cs_ont_5g011660	yes|down	yes|down	yes|down	3
Cs_ont_9g008660	yes|down	yes|down	yes|down	3
Cs_ont_1g003230	yes|down	no|up	no|down	1
Cs_ont_3g013920	no|up	no|up	yes|up	1
Cs_ont_2g023500	no|down	no|down	yes|down	1
Cs_ont_1g025680	yes|up	no|up	yes|up	2
Cs_ont_3g026520	yes|up	no|down	no|up	1
Cs_ont_8g023510	yes|up	no|down	yes|up	2
Cs_ont_6g010520	no|down	yes|up	no|up	1
Cs_ont_7g013860	yes|up	no|down	yes|up	2
Cs_ont_6g019870	yes|down	no|up	no|down	1
Cs_ont_3g012030	yes|up	no|down	no|up	1
Cs_ont_9g012020	yes|down	no|up	yes|down	2
Cs_ont_3g007440	yes|down	yes|down	yes|down	3
Cs_ont_3g007190	yes|down	no|up	yes|down	2
Cs_ont_8g026270	yes|up	no|down	yes|up	2
Cs_ont_6g005290	yes|down	no|up	yes|down	2
Cs_ont_7g022300	no|down	yes|down	yes|down	2
Cs_ont_5g001760	no|down	yes|down	yes|down	2
Cs_ont_1g026010	yes|down	no|down	yes|down	2
Cs_ont_7g027760	no|down	yes|down	yes|down	2
Cs_ont_5g040160	yes|down	no|up	yes|down	2
Cs_ont_9g010280	yes|down	no|down	yes|down	2
Cs_ont_9g025650	yes|down	no|down	yes|down	2
Cs_ont_3g002010	yes|down	no|down	yes|down	2
Cs_ont_4g015150	yes|up	no|up	yes|up	2
Cs_ont_8g012830	yes|up	no|up	yes|up	2
Cs_ont_3g024800	yes|up	no|down	no|up	1
Cs_ont_5g016590	yes|down	no|down	yes|down	2
Cs_ont_5g033590	yes|down	yes|down	yes|down	3
Cs_ont_6g001000	yes|down	no|down	no|down	1
Cs_ont_3g000940	yes|down	no|up	no|down	1
Cs_ont_4g003120	yes|up	no|down	no|up	1
Cs_ont_1g015010	no|down	no|down	yes|down	1
Cs_ont_1g012000	yes|down	yes|up	yes|down	3
Cs_ont_4g018690	yes|down	yes|up	no|down	2
Cs_ont_1g027420	no|down	no|down	yes|down	1
Cs_ont_2g001930	yes|down	no|up	yes|down	2
Cs_ont_8g008520	yes|down	no|down	yes|down	2
Cs_ont_5g035230	no|up	no|up	yes|up	1
Cs_ont_5g044640	yes|down	yes|up	no|up	2
Cs_ont_7g002530	yes|down	yes|up	no|up	2
Cs_ont_4g003710	no|down	yes|down	yes|down	2
Cs_ont_4g003240	yes|up	yes|up	yes|up	3
Cs_ont_1g013940	yes|down	no|down	yes|down	2
Cs_ont_2g005050	yes|down	no|up	no|down	1
Cs_ont_5g047160	yes|up	no|up	yes|up	2
Cs_ont_5g014190	yes|up	no|down	yes|up	2
Cs_ont_9g001210	yes|down	no|up	no|up	1
Cs_ont_Un002150	no|up	no|up	yes|up	1
Cs_ont_4g028110	yes|up	no|down	no|up	1
Cs_ont_5g049370	yes|up	no|down	yes|up	2
Cs_ont_7g019130	no|up	no|up	yes|up	1
Cs_ont_3g007220	yes|down	yes|down	yes|down	3
Cs_ont_2g020730	yes|up	yes|down	no|up	2
Cs_ont_7g027880	yes|up	no|down	yes|up	2
Cs_ont_7g018660	no|up	yes|up	yes|up	2
Cs_ont_3g009100	no|down	yes|up	yes|up	2
Cs_ont_5g039340	yes|down	no|up	no|down	1
Cs_ont_3g023040	no|up	yes|up	yes|up	2
Cs_ont_3g005590	no|up	no|up	yes|up	1
Cs_ont_6g015550	yes|down	no|up	yes|down	2
Cs_ont_4g016150	no|up	yes|up	yes|up	2
Cs_ont_7g026970	yes|up	no|down	yes|up	2
Cs_ont_1g024850	yes|down	no|down	no|down	1
Cs_ont_2g016970	yes|down	no|up	no|down	1
Cs_ont_2g025900	no|up	yes|up	yes|up	2
Cs_ont_3g020780	no|down	yes|up	no|up	1
Cs_ont_5g036340	yes|down	yes|up	no|down	2
Cs_ont_5g039520	yes|up	yes|up	yes|up	3
Cs_ont_2g007570	yes|down	no|up	yes|down	2
Cs_ont_5g032310	no|down	no|down	yes|down	1
Cs_ont_9g023720	yes|up	no|down	no|up	1
Cs_ont_9g010420	no|up	no|up	yes|up	1
Cs_ont_2g001750	no|down	yes|up	no|up	1
Cs_ont_5g005500	yes|down	no|down	yes|down	2
Cs_ont_8g025640	no|up	no|up	yes|up	1
Cs_ont_9g006180	yes|up	no|down	yes|up	2
Cs_ont_2g009580	no|up	yes|up	yes|up	2
Cs_ont_5g009300	yes|up	no|down	yes|up	2
Cs_ont_3g008850	yes|down	no|up	no|down	1
Cs_ont_9g027400	yes|down	no|up	yes|down	2
Cs_ont_7g019380	yes|down	no|up	no|down	1
Cs_ont_1g016840	yes|down	yes|down	yes|down	3
Cs_ont_9g023890	yes|down	yes|up	no|down	2
Cs_ont_8g013790	yes|down	no|down	yes|down	2
Cs_ont_4g016540	no|down	no|down	yes|down	1
Cs_ont_1g028740	no|up	no|up	yes|up	1
Cs_ont_5g046390	no|down	no|down	yes|down	1
Cs_ont_3g018290	no|down	yes|down	yes|down	2
Cs_ont_6g016200	yes|down	no|down	yes|down	2
Cs_ont_6g012520	yes|down	no|up	no|down	1
Cs_ont_3g014090	yes|up	no|up	yes|up	2
Cs_ont_7g010340	no|down	no|down	yes|down	1
Cs_ont_8g004740	no|down	no|up	yes|up	1
Cs_ont_2g031610	yes|down	no|up	no|down	1
Cs_ont_2g031340	yes|up	no|up	yes|up	2
Cs_ont_6g025170	yes|down	no|down	yes|down	2
Cs_ont_8g003770	yes|up	no|up	yes|up	2
Cs_ont_9g006530	yes|down	no|up	no|down	1
Cs_ont_7g013670	no|down	yes|up	no|up	1
Cs_ont_8g001950	yes|up	no|up	yes|up	2
Cs_ont_7g021480	yes|up	no|down	no|up	1
Cs_ont_2g000400	no|down	yes|down	yes|down	2
Cs_ont_3g010590	no|up	no|up	yes|up	1
Cs_ont_4g000720	yes|down	no|up	yes|down	2
Cs_ont_5g003210	yes|down	no|down	yes|down	2
Cs_ont_3g015810	no|down	no|down	yes|down	1
Cs_ont_6g013340	yes|down	no|up	no|down	1
Cs_ont_8g011800	yes|down	yes|up	no|down	2
Cs_ont_8g003550	yes|down	no|up	no|down	1
Cs_ont_2g031110	yes|down	no|up	yes|down	2
Cs_ont_1g007860	no|up	no|up	yes|up	1
Cs_ont_2g013650	yes|down	no|down	yes|down	2
Cs_ont_2g023310	yes|up	no|down	no|up	1
Cs_ont_2g006540	no|down	no|down	yes|down	1
Cs_ont_7g007010	no|down	no|down	yes|down	1
Cs_ont_9g021490	yes|down	no|down	yes|down	2
Cs_ont_7g001910	yes|down	no|up	yes|down	2
Cs_ont_1g016460	yes|down	no|up	no|down	1
Cs_ont_2g002580	no|up	yes|up	yes|up	2
Cs_ont_7g017350	yes|down	yes|up	no|up	2
Cs_ont_2g017390	yes|up	no|up	yes|up	2
Cs_ont_7g015480	no|up	no|up	yes|up	1
Cs_ont_9g007910	yes|down	no|down	yes|down	2
Cs_ont_5g047510	no|up	no|up	yes|up	1
Cs_ont_2g003180	yes|down	no|down	yes|down	2
Cs_ont_5g026260	yes|down	no|down	yes|down	2
Cs_ont_4g004590	yes|up	no|down	no|up	1
Cs_ont_7g023220	yes|down	no|up	yes|down	2
Cs_ont_3g002950	no|up	yes|down	no|down	1
Cs_ont_9g013760	no|up	no|up	yes|up	1
Cs_ont_6g010640	no|down	yes|up	yes|up	2
Cs_ont_3g016630	yes|down	no|down	yes|down	2
Cs_ont_6g002960	yes|up	no|down	no|up	1
Cs_ont_4g006440	yes|down	no|up	yes|down	2
Cs_ont_1g022070	yes|up	yes|down	no|down	2
Cs_ont_6g010850	yes|down	no|up	no|down	1
Cs_ont_2g020500	yes|down	no|up	no|down	1
Cs_ont_2g032990	yes|down	yes|up	no|down	2
Cs_ont_4g004620	yes|down	no|down	yes|down	2
Cs_ont_2g014850	yes|down	no|up	yes|down	2
Cs_ont_3g029490	yes|down	yes|up	no|up	2
Cs_ont_1g018530	no|down	no|down	yes|down	1
Cs_ont_5g007010	yes|up	no|up	yes|up	2
Cs_ont_2g002050	no|down	no|down	yes|down	1
Cs_ont_3g032380	yes|down	yes|up	no|down	2
Cs_ont_9g003780	yes|down	yes|up	no|up	2
Cs_ont_4g028580	yes|up	no|up	yes|up	2
Cs_ont_7g026760	no|down	yes|down	yes|down	2
Cs_ont_1g019220	yes|down	no|down	yes|down	2
Cs_ont_2g009210	no|down	no|down	yes|down	1
Cs_ont_5g011340	no|up	yes|up	yes|up	2
Cs_ont_2g032190	yes|down	no|down	yes|down	2
Cs_ont_5g044090	no|up	no|up	yes|up	1
Cs_ont_4g020030	yes|down	yes|up	no|up	2
Cs_ont_9g008120	yes|down	no|up	yes|down	2
Cs_ont_4g003010	yes|up	no|down	no|up	1
Cs_ont_5g015100	yes|down	no|up	yes|down	2
Cs_ont_1g018280	yes|down	no|up	no|down	1
Cs_ont_8g028300	no|down	no|down	yes|down	1
Cs_ont_2g002630	no|up	yes|up	yes|up	2
Cs_ont_7g004090	no|down	no|down	yes|down	1
Cs_ont_2g004060	no|up	yes|up	yes|up	2
Cs_ont_8g024130	yes|down	no|up	no|down	1
Cs_ont_8g024680	no|down	no|down	yes|down	1
Cs_ont_9g009450	yes|down	no|up	no|down	1
Cs_ont_1g000270	yes|down	no|up	yes|down	2
Cs_ont_3g008190	yes|down	no|up	no|down	1
Cs_ont_2g032440	yes|down	no|up	no|down	1
Cs_ont_5g044890	yes|down	no|up	no|down	1
Cs_ont_7g024940	yes|down	no|down	yes|down	2
Cs_ont_7g010660	yes|down	yes|up	yes|down	3
Cs_ont_8g025080	no|down	yes|up	yes|up	2
Cs_ont_7g028680	no|up	yes|down	yes|down	2
Cs_ont_4g025460	yes|down	no|down	yes|down	2
Cs_ont_6g020100	no|down	yes|up	yes|up	2
Cs_ont_2g026210	no|down	yes|up	no|up	1
Cs_ont_5g048180	yes|down	no|up	no|down	1
Cs_ont_1g028240	no|down	no|down	yes|down	1
Cs_ont_8g024350	yes|up	no|down	yes|up	2
Cs_ont_9g009230	yes|down	yes|up	no|up	2
Cs_ont_5g049580	yes|up	no|down	no|up	1
Cs_ont_3g008990	no|down	no|down	yes|down	1
Cs_ont_3g008440	no|up	yes|up	yes|up	2
Cs_ont_7g027560	yes|down	yes|up	no|up	2
Cs_ont_2g000180	no|down	no|down	yes|down	1
Cs_ont_2g019460	yes|down	yes|down	yes|down	3
Cs_ont_7g027410	yes|down	no|up	no|down	1
Cs_ont_1g013880	no|up	yes|up	yes|up	2
Cs_ont_3g000080	yes|down	yes|up	yes|down	3
Cs_ont_6g008060	yes|down	yes|up	no|down	2
Cs_ont_5g008820	yes|up	no|down	yes|up	2
Cs_ont_9g026720	yes|down	yes|up	yes|up	3
Cs_ont_5g049630	yes|up	no|up	yes|up	2
Cs_ont_8g019890	yes|down	no|up	yes|down	2
Cs_ont_8g001560	yes|down	yes|down	yes|down	3
Cs_ont_6g016940	yes|down	no|up	yes|down	2
Cs_ont_2g019720	yes|down	yes|down	yes|down	3
Cs_ont_4g003900	yes|up	no|up	yes|up	2
Cs_ont_4g001430	no|down	no|down	yes|down	1
Cs_ont_7g028020	yes|down	yes|up	yes|down	3
Cs_ont_1g010280	no|down	no|down	yes|down	1
Cs_ont_2g006470	yes|down	yes|up	no|up	2
Cs_ont_9g001150	yes|down	no|down	yes|down	2
Cs_ont_3g006480	no|up	no|up	yes|up	1
Cs_ont_8g027300	yes|up	no|up	yes|up	2
Cs_ont_8g027650	yes|up	no|down	yes|up	2
Cs_ont_5g048330	yes|down	no|up	no|down	1
Cs_ont_3g000620	yes|down	yes|up	no|down	2
Cs_ont_1g024450	yes|up	no|up	yes|up	2
Cs_ont_8g009000	no|up	no|up	yes|up	1
Cs_ont_5g045850	no|up	no|up	yes|up	1
Cs_ont_2g016260	no|down	no|up	yes|down	1
Cs_ont_5g027400	no|up	yes|up	yes|up	2
Cs_ont_5g027150	yes|down	no|up	no|down	1
Cs_ont_6g015940	yes|up	no|up	yes|up	2
Cs_ont_6g015760	yes|down	no|down	yes|down	2
Cs_ont_3g030440	yes|up	yes|up	yes|up	3
Cs_ont_2g030750	no|down	no|down	yes|down	1
Cs_ont_1g008100	yes|down	no|down	yes|down	2
Cs_ont_1g029370	no|up	yes|down	yes|down	2
Cs_ont_5g047720	yes|down	no|up	yes|down	2
Cs_ont_4g004360	no|down	no|down	yes|down	1
Cs_ont_5g036400	yes|down	yes|up	no|up	2
Cs_ont_1g004360	yes|down	no|up	yes|down	2
Cs_ont_5g007570	yes|down	no|down	yes|down	2
Cs_ont_9g018870	yes|up	no|down	no|up	1
Cs_ont_4g016480	yes|up	no|up	yes|up	2
Cs_ont_3g021990	no|down	no|down	yes|down	1
Cs_ont_4g001620	yes|down	no|down	yes|down	2
Cs_ont_5g024710	yes|down	no|up	no|down	1
Cs_ont_1g000870	yes|down	no|up	yes|down	2
Cs_ont_8g004260	no|down	no|down	yes|down	1
Cs_ont_5g008950	yes|down	no|down	yes|down	2
Cs_ont_5g035270	yes|up	no|up	yes|up	2
Cs_ont_4g022770	yes|up	no|down	yes|up	2
Cs_ont_1g002400	no|up	no|up	yes|up	1
Cs_ont_7g003070	yes|down	no|up	no|down	1
Cs_ont_7g006000	no|up	no|up	yes|up	1
Cs_ont_2g009020	yes|up	no|up	yes|up	2
Cs_ont_8g026470	yes|up	yes|up	yes|up	3
Cs_ont_7g000250	yes|down	no|down	yes|down	2
Cs_ont_2g003040	no|down	no|down	yes|down	1
Cs_ont_7g007750	yes|down	no|up	no|down	1
Cs_ont_1g016610	no|down	no|down	yes|down	1
Cs_ont_1g003210	yes|up	no|down	yes|up	2
Cs_ont_6g018100	yes|down	no|down	yes|down	2
Cs_ont_2g031150	no|down	no|down	yes|down	1
Cs_ont_2g012940	no|up	yes|up	yes|up	2
Cs_ont_7g004950	yes|up	no|down	yes|up	2
Cs_ont_6g008660	yes|down	no|down	yes|down	2
Cs_ont_1g025910	yes|up	no|down	no|down	1
Cs_ont_3g021220	yes|down	yes|up	yes|down	3
Cs_ont_5g048210	no|down	yes|up	yes|up	2
Cs_ont_Un000120	no|down	no|down	yes|down	1
Cs_ont_6g010810	no|down	no|down	yes|down	1
Cs_ont_2g004400	yes|up	no|up	yes|up	2
Cs_ont_7g021670	yes|down	no|up	no|down	1
Cs_ont_2g032830	no|down	no|down	yes|down	1
Cs_ont_3g011880	yes|down	yes|up	no|up	2
Cs_ont_7g022320	yes|down	no|up	no|down	1
Cs_ont_5g001740	yes|up	no|up	yes|up	2
Cs_ont_3g022080	yes|down	no|down	yes|down	2
Cs_ont_7g027780	yes|down	no|up	no|down	1
Cs_ont_2g023620	yes|up	no|up	yes|up	2
Cs_ont_4g007100	yes|up	no|up	yes|up	2
Cs_ont_2g008330	yes|down	yes|up	yes|down	3
Cs_ont_5g048370	no|down	no|down	yes|down	1
Cs_ont_2g021840	yes|up	no|up	no|up	1
Cs_ont_8g019330	yes|down	no|down	yes|down	2
Cs_ont_5g034050	yes|up	no|up	yes|up	2
Cs_ont_3g016280	yes|down	no|up	yes|down	2
Cs_ont_5g000290	yes|down	no|down	yes|down	2
Cs_ont_8g007710	yes|down	no|up	no|down	1
Cs_ont_6g001020	yes|down	yes|down	yes|down	3
Cs_ont_2g014620	yes|up	no|down	no|up	1
Cs_ont_2g002930	yes|up	no|down	yes|up	2
Cs_ont_6g014220	yes|down	no|up	yes|down	2
Cs_ont_7g001120	yes|down	no|down	yes|down	2
Cs_ont_7g001690	yes|up	no|down	no|up	1
Cs_ont_2g001910	yes|down	no|up	no|down	1
Cs_ont_7g018060	no|up	no|up	yes|up	1
Cs_ont_1g018070	yes|up	no|up	yes|up	2
Cs_ont_5g010770	yes|down	no|up	yes|down	2
Cs_ont_7g028230	yes|up	no|up	yes|up	2
Cs_ont_4g025810	yes|down	no|down	yes|down	2
Cs_ont_6g000190	yes|up	no|down	yes|up	2
Cs_ont_1g027740	yes|down	no|up	no|down	1
Cs_ont_9g013510	yes|up	no|up	no|up	1
Cs_ont_1g012610	yes|down	no|up	yes|down	2
Cs_ont_2g022570	yes|down	no|up	yes|down	2
Cs_ont_4g006270	yes|down	no|down	no|down	1
Cs_ont_8g020760	no|up	no|up	yes|up	1
Cs_ont_3g008290	no|down	no|down	yes|down	1
Cs_ont_6g009210	yes|down	no|up	yes|down	2
Cs_ont_4g012480	no|down	no|up	yes|up	1
Cs_ont_3g011080	yes|down	no|up	yes|down	2
Cs_ont_8g021790	no|down	yes|up	yes|up	2
Cs_ont_6g014480	no|down	no|down	yes|down	1
Cs_ont_6g000990	yes|down	no|up	yes|down	2
Cs_ont_2g026000	no|no test	yes|down	yes|down	2
Cs_ont_7g020330	yes|down	no|down	no|down	1
Cs_ont_9g001090	yes|down	yes|up	yes|down	3
Cs_ont_1g001180	yes|down	no|up	yes|down	2
Cs_ont_4g016170	yes|down	no|up	yes|down	2
Cs_ont_4g028390	no|up	no|up	yes|up	1
Cs_ont_1g014340	yes|down	yes|up	no|down	2
Cs_ont_8g001710	no|down	no|down	yes|down	1
Cs_ont_Un006040	no|up	no|up	yes|up	1
Cs_ont_1g000590	yes|up	no|down	yes|up	2
Cs_ont_5g041290	yes|down	yes|down	yes|down	3
Cs_ont_5g040460	no|up	no|up	yes|up	1
Cs_ont_1g022390	yes|down	yes|up	no|down	2
Cs_ont_7g002800	yes|down	no|up	yes|down	2
Cs_ont_2g007510	yes|up	no|down	yes|up	2
Cs_ont_2g030700	yes|down	no|down	yes|down	2
Cs_ont_2g002140	no|down	yes|down	yes|down	2
Cs_ont_4g002170	yes|down	no|down	yes|down	2
Cs_ont_2g001770	yes|down	no|up	yes|down	2
Cs_ont_1g004600	no|up	no|up	yes|up	1
Cs_ont_8g015590	yes|down	no|up	no|down	1
Cs_ont_2g018620	no|down	yes|down	yes|down	2
Cs_ont_9g021850	yes|down	no|up	no|down	1
Cs_ont_8g027530	no|up	yes|up	yes|up	2
Cs_ont_1g028920	yes|up	no|down	no|up	1
Cs_ont_7g010050	yes|down	no|up	no|down	1
Cs_ont_4g027110	no|down	yes|down	yes|down	2
Cs_ont_6g022750	no|down	no|down	yes|down	1
Cs_ont_4g022540	no|down	yes|down	yes|down	2
Cs_ont_2g024740	yes|down	yes|up	yes|up	3
Cs_ont_2g025170	yes|down	yes|up	yes|down	3
Cs_ont_4g019570	yes|down	no|up	yes|down	2
Cs_ont_1g028760	yes|down	no|down	yes|down	2
Cs_ont_5g009180	no|up	no|up	yes|up	1
Cs_ont_1g021370	yes|down	yes|up	yes|down	3
Cs_ont_1g024560	yes|down	no|up	yes|down	2
Cs_ont_5g041830	yes|up	no|up	yes|up	2
Cs_ont_9g002540	yes|up	no|down	yes|up	2
Cs_ont_6g012500	yes|down	no|up	yes|down	2
Cs_ont_5g022910	yes|down	no|up	no|down	1
Cs_ont_8g004890	yes|up	no|up	yes|up	2
Cs_ont_2g025920	yes|down	no|up	no|down	1
Cs_ont_3g013220	no|up	yes|up	yes|up	2
Cs_ont_5g027360	no|down	no|down	yes|down	1
Cs_ont_8g023230	no|up	yes|down	yes|down	2
Cs_ont_1g021020	yes|up	yes|down	no|up	2
Cs_ont_4g015970	yes|down	no|up	no|up	1
Cs_ont_4g005190	yes|down	no|up	yes|down	2
Cs_ont_7g019040	no|down	no|down	yes|down	1
Cs_ont_4g009390	yes|up	no|up	yes|up	2
Cs_ont_5g013520	yes|up	no|up	yes|up	2
Cs_ont_7g002110	yes|down	no|up	no|down	1
Cs_ont_9g019420	no|up	no|up	yes|up	1
Cs_ont_8g009710	yes|down	no|up	no|down	1
Cs_ont_4g004820	no|down	yes|down	yes|down	2
Cs_ont_2g011250	yes|up	no|down	yes|up	2
Cs_ont_3g013040	yes|down	no|down	yes|down	2
Cs_ont_5g004050	no|down	yes|up	yes|up	2
Cs_ont_9g028220	yes|down	no|up	no|down	1
Cs_ont_7g003190	yes|down	no|up	yes|down	2
Cs_ont_1g020180	yes|up	no|down	yes|up	2
Cs_ont_1g019930	yes|up	no|down	no|up	1
Cs_ont_9g007700	yes|down	no|up	no|down	1
Cs_ont_7g001970	yes|down	no|down	yes|down	2
Cs_ont_1g016440	yes|up	no|down	no|up	1
Cs_ont_9g003140	yes|down	no|up	yes|down	2
Cs_ont_9g003630	no|down	yes|up	no|up	1
Cs_ont_6g013100	yes|up	no|down	no|down	1
Cs_ont_1g015930	yes|down	no|up	no|down	1
Cs_ont_8g008390	yes|down	yes|up	no|down	2
Cs_ont_6g016620	no|up	no|up	yes|up	1
Cs_ont_9g015210	yes|down	no|up	yes|down	2
Cs_ont_7g026310	no|up	yes|up	yes|up	2
Cs_ont_8g022540	no|down	no|down	yes|down	1
Cs_ont_3g022260	yes|down	no|up	no|down	1
Cs_ont_2g016390	yes|down	no|up	no|down	1
Cs_ont_9g019350	no|up	no|up	yes|up	1
Cs_ont_6g017680	no|up	no|up	yes|up	1
Cs_ont_6g018590	yes|up	no|up	yes|up	2
Cs_ont_6g013360	yes|up	no|up	yes|up	2
Cs_ont_4g006230	yes|down	yes|down	yes|down	3
Cs_ont_8g016100	yes|down	yes|up	no|up	2
Cs_ont_3g016610	yes|up	no|up	yes|up	2
Cs_ont_3g016340	yes|down	no|down	yes|down	2
Cs_ont_3g019520	yes|up	no|up	yes|up	2
Cs_ont_3g012310	yes|up	yes|up	yes|up	3
Cs_ont_6g002900	no|up	no|up	yes|up	1
Cs_ont_4g006460	yes|down	no|up	yes|down	2
Cs_ont_8g002660	yes|down	no|up	yes|down	2
Cs_ont_5g050120	yes|up	no|up	yes|up	2
Cs_ont_1g022050	yes|down	no|down	no|down	1
Cs_ont_2g006480	yes|down	no|up	no|down	1
Cs_ont_1g000600	no|down	yes|down	yes|down	2
Cs_ont_3g011960	no|down	yes|down	yes|down	2
Cs_ont_9g024730	yes|down	no|up	yes|down	2
Cs_ont_1g011580	yes|down	no|up	no|down	1
Cs_ont_1g018510	yes|up	no|up	yes|up	2
Cs_ont_2g002030	yes|down	yes|down	yes|down	3
Cs_ont_1g001950	yes|down	no|up	yes|down	2
Cs_ont_5g030270	no|down	yes|up	yes|up	2
Cs_ont_3g001590	yes|up	no|up	yes|up	2
Cs_ont_4g006640	yes|down	yes|up	no|down	2
Cs_ont_7g008160	no|down	no|down	yes|down	1
Cs_ont_6g020500	no|down	yes|up	no|up	1
Cs_ont_8g029180	no|up	no|up	yes|up	1
Cs_ont_9g008140	no|down	yes|up	no|up	1
Cs_ont_4g008070	no|up	no|up	yes|up	1
Cs_ont_4g003030	no|down	no|down	yes|down	1
Cs_ont_9g014160	yes|down	no|up	no|down	1
Cs_ont_2g005680	yes|up	no|down	no|up	1
Cs_ont_2g033800	yes|down	no|up	no|down	1
Cs_ont_4g025660	yes|up	no|up	yes|up	2
Cs_ont_5g044330	yes|up	no|down	yes|up	2
Cs_ont_1g028970	no|down	yes|down	yes|down	2
Cs_ont_3g002970	yes|up	no|down	no|up	1
Cs_ont_7g023750	yes|down	no|up	no|down	1
Cs_ont_7g005690	yes|up	yes|up	yes|up	3
Cs_ont_4g024530	no|down	yes|up	no|up	1
Cs_ont_9g009430	no|up	no|up	yes|up	1
Cs_ont_4g024280	yes|down	no|up	no|up	1
Cs_ont_5g043510	no|down	no|down	yes|down	1
Cs_ont_8g007750	yes|down	no|down	yes|down	2
Cs_ont_1g011130	yes|down	no|up	no|down	1
Cs_ont_3g018120	yes|down	no|down	yes|down	2
Cs_ont_7g017920	yes|down	no|up	no|down	1
Cs_ont_3g030380	no|up	yes|up	yes|up	2
Cs_ont_4g023620	no|down	yes|down	yes|down	2
Cs_ont_1g026600	yes|down	yes|down	yes|down	3
Cs_ont_3g004560	yes|down	yes|up	no|up	2
Cs_ont_4g025480	no|up	no|up	yes|up	1
Cs_ont_5g026620	yes|up	yes|up	yes|up	3
Cs_ont_3g008460	no|up	no|up	yes|up	1
Cs_ont_8g013350	yes|down	no|down	yes|down	2
Cs_ont_5g041620	yes|down	no|down	yes|down	2
Cs_ont_7g002470	yes|up	no|down	no|up	1
Cs_ont_9g014570	yes|down	no|down	yes|down	2
Cs_ont_2g014160	yes|down	yes|down	yes|down	3
Cs_ont_7g027430	yes|down	no|down	yes|down	2
Cs_ont_5g035280	no|up	no|up	yes|up	1
Cs_ont_2g023380	yes|down	yes|up	no|up	2
Cs_ont_6g004280	yes|down	no|up	no|down	1
Cs_ont_5g014250	yes|down	no|up	no|down	1
Cs_ont_9g001390	yes|down	no|up	yes|down	2
Cs_ont_8g020140	yes|up	yes|up	yes|up	3
Cs_ont_4g005340	no|down	yes|up	yes|up	2
Cs_ont_4g005690	yes|down	no|up	no|down	1
Cs_ont_9g027070	yes|down	no|up	yes|down	2
Cs_ont_2g010390	yes|up	no|down	no|up	1
Cs_ont_3g024290	no|up	no|up	yes|up	1
Cs_ont_1g002510	no|down	yes|up	no|up	1
Cs_ont_7g002610	yes|down	no|down	yes|down	2
Cs_ont_4g023080	no|down	no|down	yes|down	1
Cs_ont_3g004380	yes|down	no|up	no|down	1
Cs_ont_2g034410	yes|up	no|up	yes|up	2
Cs_ont_7g025560	no|up	yes|up	yes|up	2
Cs_ont_1g015340	yes|down	yes|up	yes|down	3
Cs_ont_7g016520	no|down	no|down	yes|down	1
Cs_ont_5g008110	no|up	yes|down	no|down	1
Cs_ont_4g022970	no|down	no|down	yes|down	1
Cs_ont_3g001110	yes|up	no|up	yes|up	2
Cs_ont_1g012800	yes|down	no|up	no|down	1
Cs_ont_2g022380	yes|up	no|up	yes|up	2
Cs_ont_1g028510	no|up	no|up	yes|up	1
Cs_ont_9g002150	yes|down	no|down	yes|down	2
Cs_ont_8g027670	yes|up	no|up	yes|up	2
Cs_ont_1g029170	no|up	no|up	yes|up	1
Cs_ont_4g023880	no|down	no|down	yes|down	1
Cs_ont_4g027250	yes|down	yes|up	no|up	2
Cs_ont_6g022560	yes|up	no|down	yes|up	2
Cs_ont_2g005870	yes|down	no|up	yes|down	2
Cs_ont_3g009730	yes|down	no|up	no|down	1
Cs_ont_5g045830	no|down	no|down	yes|down	1
Cs_ont_6g025690	yes|down	no|up	no|down	1
Cs_ont_5g007630	yes|up	no|up	yes|up	2
Cs_ont_5g027170	yes|down	no|up	no|down	1
Cs_ont_3g005380	yes|down	no|down	yes|down	2
Cs_ont_5g031510	yes|down	no|up	yes|down	2
Cs_ont_2g013320	yes|down	yes|up	no|down	2
Cs_ont_3g006600	no|down	yes|down	yes|down	2
Cs_ont_6g012990	yes|up	no|up	yes|up	2
Cs_ont_6g012770	yes|down	yes|down	yes|down	3
Cs_ont_3g014910	yes|down	no|up	no|down	1
Cs_ont_5g047740	no|down	yes|down	yes|down	2
Cs_ont_5g047960	yes|down	no|up	no|down	1
Cs_ont_2g029720	yes|up	no|up	yes|up	2
Cs_ont_5g003640	yes|down	no|up	no|down	1
Cs_ont_9g016630	yes|down	yes|up	yes|down	3
Cs_ont_4g022280	yes|down	no|down	yes|down	2
Cs_ont_3g013690	no|up	yes|up	yes|up	2
Cs_ont_5g023700	yes|down	yes|up	no|down	2
Cs_ont_5g027280	no|down	no|down	yes|down	1
Cs_ont_2g018470	no|down	yes|up	yes|up	2
Cs_ont_4g001640	no|down	no|down	yes|down	1
Cs_ont_4g001860	no|down	no|down	yes|down	1
Cs_ont_4g002310	no|down	no|down	yes|down	1
Cs_ont_4g004120	no|down	no|down	yes|down	1
Cs_ont_9g021510	yes|down	no|up	no|down	1
Cs_ont_1g016050	yes|down	no|down	yes|down	2
Cs_ont_2g011110	yes|down	no|down	yes|down	2
Cs_ont_1g016580	yes|down	no|up	no|down	1
Cs_ont_4g022750	no|down	no|down	yes|down	1
Cs_ont_2g011880	yes|down	no|up	no|down	1
Cs_ont_7g015500	yes|up	no|up	yes|up	2
Cs_ont_4g013980	yes|up	no|up	yes|up	2
Cs_ont_7g024770	yes|down	no|up	yes|down	2
Cs_ont_5g015330	no|up	yes|down	yes|down	2
Cs_ont_5g015760	yes|down	no|down	yes|down	2
Cs_ont_5g012660	no|down	no|down	yes|down	1
Cs_ont_2g031420	yes|down	yes|up	no|down	2
Cs_ont_5g019800	no|down	no|down	yes|down	1
Cs_ont_3g033080	no|down	no|down	yes|down	1
Cs_ont_2g024260	yes|up	no|up	yes|up	2
Cs_ont_2g023810	yes|up	no|up	yes|up	2
Cs_ont_2g012390	yes|down	no|up	yes|down	2
Cs_ont_4g019030	yes|down	no|up	no|down	1
Cs_ont_8g023550	no|down	yes|up	yes|up	2
Cs_ont_8g019130	no|down	no|down	yes|down	1
Cs_ont_5g014890	yes|down	no|up	yes|down	2
Cs_ont_9g012790	yes|down	no|down	yes|down	2
Cs_ont_3g019750	no|up	yes|down	yes|down	2
Cs_ont_6g006070	no|up	no|up	yes|up	1
Cs_ont_6g002020	yes|down	no|up	no|down	1
Cs_ont_7g022340	yes|up	no|up	yes|up	2
Cs_ont_2g027040	yes|up	no|down	yes|up	2
Cs_ont_6g001590	yes|down	yes|up	no|down	2
Cs_ont_5g001720	yes|up	no|up	yes|up	2
Cs_ont_5g001890	yes|down	no|up	yes|down	2
Cs_ont_6g025340	yes|down	no|up	no|down	1
Cs_ont_4g007470	yes|up	no|up	yes|up	2
Cs_ont_9g025610	no|up	no|up	yes|up	1
Cs_ont_9g015270	no|down	yes|down	yes|down	2
Cs_ont_9g025340	yes|down	no|up	no|down	1
Cs_ont_2g000680	yes|up	no|down	no|down	1
Cs_ont_3g024840	no|up	no|up	yes|up	1
Cs_ont_9g004250	yes|down	no|up	no|down	1
Cs_ont_5g010190	no|up	no|up	yes|up	1
Cs_ont_2g018890	yes|down	yes|up	yes|up	3
Cs_ont_3g028170	yes|down	no|down	yes|down	2
Cs_ont_4g027080	no|down	no|down	yes|down	1
Cs_ont_2g003530	yes|down	no|up	yes|down	2
Cs_ont_2g028540	no|down	no|down	yes|down	1
Cs_ont_2g014390	yes|down	no|down	no|down	1
Cs_ont_7g009480	no|down	yes|up	yes|up	2
Cs_ont_7g023440	yes|down	no|down	no|down	1
Cs_ont_5g014400	yes|down	no|up	yes|down	2
Cs_ont_7g008570	yes|up	no|down	yes|up	2
Cs_ont_1g014980	yes|up	no|up	yes|up	2
Cs_ont_8g022970	yes|down	no|down	yes|down	2
Cs_ont_8g026230	yes|down	no|up	no|down	1
Cs_ont_Un000170	no|down	no|down	yes|down	1
Cs_ont_2g032810	no|up	no|up	yes|up	1
Cs_ont_3g004170	yes|down	no|up	yes|down	2
Cs_ont_8g021600	no|down	no|down	yes|down	1
Cs_ont_5g010790	yes|down	yes|up	no|up	2
Cs_ont_7g001360	no|up	no|up	yes|up	1
Cs_ont_7g028250	yes|up	yes|up	yes|up	3
Cs_ont_4g025830	no|up	no|up	yes|up	1
Cs_ont_3g023660	yes|down	no|up	no|down	1
Cs_ont_9g018300	no|down	no|down	yes|down	1
Cs_ont_1g012630	yes|down	no|up	no|down	1
Cs_ont_3g032020	yes|up	no|down	no|up	1
Cs_ont_3g027570	yes|down	no|up	no|down	1
Cs_ont_5g005170	yes|down	no|down	yes|down	2
Cs_ont_5g049330	yes|down	no|down	yes|down	2
Cs_ont_6g009270	yes|down	no|up	no|down	1
Cs_ont_5g037210	no|down	yes|up	yes|up	2
Cs_ont_5g041100	yes|up	no|up	yes|up	2
Cs_ont_8g007730	no|down	yes|up	yes|up	2
Cs_ont_3g004710	yes|down	no|up	yes|down	2
Cs_ont_5g045480	yes|up	no|down	yes|up	2
Cs_ont_5g048820	yes|up	no|up	yes|up	2
Cs_ont_2g026020	no|up	no|up	yes|up	1
Cs_ont_5g007820	yes|down	no|up	yes|down	2
Cs_ont_6g015510	yes|down	no|up	yes|down	2
Cs_ont_2g016930	yes|down	no|up	no|down	1
Cs_ont_9g026190	no|down	no|up	yes|up	1
Cs_ont_1g023390	yes|up	yes|down	no|up	2
Cs_ont_6g026250	yes|down	no|down	yes|down	2
Cs_ont_2g007530	yes|down	no|up	no|down	1
Cs_ont_5g045150	yes|up	no|down	no|up	1
Cs_ont_3g031130	yes|down	yes|down	yes|down	3
Cs_ont_1g009170	yes|down	yes|up	yes|down	3
Cs_ont_1g011550	no|down	no|down	yes|down	1
Cs_ont_7g022780	yes|up	no|down	yes|up	2
Cs_ont_2g001790	no|down	no|down	yes|down	1
Cs_ont_1g004620	yes|up	no|up	yes|up	2
Cs_ont_6g001290	yes|up	no|up	yes|up	2
Cs_ont_9g004460	yes|down	yes|up	no|down	2
Cs_ont_9g021870	yes|up	no|up	yes|up	2
Cs_ont_9g002700	no|down	yes|up	yes|up	2
Cs_ont_4g027130	yes|down	no|down	yes|down	2
Cs_ont_1g026410	yes|down	yes|up	no|up	2
Cs_ont_3g000450	yes|up	no|up	yes|up	2
Cs_ont_7g018620	yes|up	no|up	yes|up	2
Cs_ont_5g012940	yes|up	no|down	no|up	1
Cs_ont_1g020150	yes|down	yes|up	no|up	2
Cs_ont_1g017670	yes|down	no|down	yes|down	2
Cs_ont_4g019550	no|up	yes|up	yes|up	2
Cs_ont_4g006480	no|down	no|down	yes|down	1
Cs_ont_2g009890	no|up	no|up	yes|up	1
Cs_ont_2g021550	yes|up	no|up	yes|up	2
Cs_ont_8g019910	no|down	no|down	yes|down	1
Cs_ont_9g017040	yes|down	yes|up	no|up	2
Cs_ont_1g021820	yes|down	no|down	yes|down	2
Cs_ont_9g009280	yes|up	yes|up	yes|up	3
Cs_ont_3g018250	no|down	no|down	yes|down	1
Cs_ont_3g014580	no|up	yes|up	yes|up	2
Cs_ont_5g022930	yes|down	yes|up	no|up	2
Cs_ont_8g004870	yes|up	yes|up	yes|up	3
Cs_ont_5g036140	no|up	yes|up	yes|up	2
Cs_ont_8g003730	yes|up	no|down	no|up	1
Cs_ont_1g029140	yes|up	yes|down	no|up	2
Cs_ont_5g046680	yes|up	no|up	yes|up	2
Cs_ont_8g001990	no|up	no|up	yes|up	1
Cs_ont_9g027910	yes|up	no|up	yes|up	2
Cs_ont_3g018780	yes|up	no|up	yes|up	2
Cs_ont_1g002700	yes|down	no|up	yes|down	2
Cs_ont_7g002130	yes|down	no|up	no|down	1
Cs_ont_5g006010	yes|up	yes|up	yes|up	3
Cs_ont_3g014630	yes|down	yes|down	yes|down	3
Cs_ont_2g008940	yes|up	no|up	no|up	1
Cs_ont_4g004800	no|down	no|down	yes|down	1
Cs_ont_2g011270	yes|down	no|up	no|down	1
Cs_ont_9g024930	no|up	no|up	yes|up	1
Cs_ont_2g007790	no|down	yes|up	no|up	1
Cs_ont_8g003840	no|up	yes|up	yes|up	2
Cs_ont_2g017600	yes|down	no|up	yes|down	2
Cs_ont_1g017510	no|down	yes|up	no|up	1
Cs_ont_1g017040	yes|down	no|down	yes|down	2
Cs_ont_7g014820	no|up	no|up	yes|up	1
Cs_ont_6g012380	yes|up	no|up	yes|up	2
Cs_ont_1g022420	yes|down	yes|up	no|down	2
Cs_ont_2g013570	no|down	no|down	yes|down	1
Cs_ont_1g019910	yes|down	no|down	yes|down	2
Cs_ont_1g013200	no|down	yes|up	no|up	1
Cs_ont_2g003230	yes|down	no|up	no|down	1
Cs_ont_7g001950	yes|down	no|up	no|up	1
Cs_ont_5g021330	no|down	yes|up	yes|up	2
Cs_ont_7g025690	yes|down	no|down	yes|down	2
Cs_ont_6g018600	yes|up	no|down	no|up	1
Cs_ont_4g026440	yes|down	no|up	yes|down	2
Cs_ont_9g018930	yes|up	no|up	yes|up	2
Cs_ont_8g023960	no|up	no|up	yes|up	1
Cs_ont_9g012470	no|down	no|up	yes|up	1
Cs_ont_7g021730	yes|down	no|down	yes|down	2
Cs_ont_8g002460	yes|up	yes|up	yes|up	3
Cs_ont_3g006140	yes|up	no|down	no|up	1
Cs_ont_5g042650	yes|up	yes|down	no|down	2
Cs_ont_5g047550	no|up	yes|up	yes|up	2
Cs_ont_7g012500	no|down	yes|down	yes|down	2
Cs_ont_8g000640	no|down	yes|up	no|up	1
Cs_ont_9g011070	yes|down	yes|up	no|down	2
Cs_ont_9g021180	yes|down	yes|up	yes|down	3
Cs_ont_6g021320	yes|down	no|up	no|down	1
Cs_ont_7g025340	yes|down	no|up	yes|down	2
Cs_ont_5g025610	yes|down	no|up	no|down	1
Cs_ont_8g018430	yes|down	yes|up	no|down	2
Cs_ont_5g040680	yes|down	no|down	yes|down	2
Cs_ont_6g007060	no|up	no|up	yes|up	1
Cs_ont_8g003590	yes|down	no|down	yes|down	2
Cs_ont_5g023110	no|up	no|up	yes|up	1
Cs_ont_6g010600	yes|up	yes|up	yes|up	3
Cs_ont_5g030470	yes|down	yes|down	yes|down	3
Cs_ont_6g006910	yes|up	no|up	yes|up	2
Cs_ont_6g000560	no|up	no|up	yes|up	1
Cs_ont_2g018800	no|down	no|down	yes|down	1
Cs_ont_3g003530	no|up	no|up	yes|up	1
Cs_ont_8g022690	yes|down	no|up	no|down	1
Cs_ont_7g020110	yes|down	no|up	yes|down	2
Cs_ont_7g000190	yes|up	no|up	yes|up	2
Cs_ont_4g000320	no|down	yes|down	yes|down	2
Cs_ont_2g028390	yes|down	yes|down	yes|down	3
Cs_ont_1g026250	yes|down	no|down	yes|down	2
Cs_ont_4g007860	no|up	yes|down	yes|down	2
Cs_ont_5g030210	no|up	yes|up	yes|up	2
Cs_ont_2g001890	yes|up	no|down	no|up	1
Cs_ont_3g032920	no|up	no|up	yes|up	1
Cs_ont_1g019260	no|up	yes|up	yes|up	2
Cs_ont_2g006200	yes|down	no|down	yes|down	2
Cs_ont_5g037970	yes|down	no|up	no|down	1
Cs_ont_7g009360	yes|up	yes|down	yes|down	3
Cs_ont_7g009810	no|down	no|down	yes|down	1
Cs_ont_9g014140	no|up	yes|down	no|down	1
Cs_ont_4g011390	yes|down	no|up	no|down	1
Cs_ont_4g025640	yes|up	no|up	yes|up	2
Cs_ont_6g024230	no|down	no|down	yes|down	1
Cs_ont_8g012170	yes|down	no|down	yes|down	2
Cs_ont_9g022430	yes|down	no|down	yes|down	2
Cs_ont_9g009140	no|down	yes|up	yes|up	2
Cs_ont_7g019500	yes|down	no|up	no|down	1
Cs_ont_3g007360	yes|down	no|up	yes|down	2
Cs_ont_5g044850	yes|down	no|up	yes|down	2
Cs_ont_1g011110	no|up	no|up	yes|up	1
Cs_ont_2g027700	yes|up	no|up	yes|up	2
Cs_ont_8g007690	no|up	no|up	yes|up	1
Cs_ont_5g025870	yes|down	no|down	yes|down	2
Cs_ont_2g014980	yes|up	no|down	yes|up	2
Cs_ont_5g002010	yes|down	no|down	yes|down	2
Cs_ont_6g020140	yes|down	no|up	no|down	1
Cs_ont_2g007800	no|up	yes|up	yes|up	2
Cs_ont_2g009250	no|up	yes|up	yes|up	2
Cs_ont_3g023270	no|up	yes|up	yes|up	2
Cs_ont_2g017540	no|down	no|down	yes|down	1
Cs_ont_5g041640	no|down	yes|up	no|up	1
Cs_ont_2g000140	yes|down	no|down	yes|down	2
Cs_ont_6g005750	no|up	yes|up	yes|up	2
Cs_ont_7g002450	no|up	yes|down	yes|down	2
Cs_ont_4g017430	no|up	yes|down	no|down	1
Cs_ont_9g014550	no|down	no|down	yes|down	1
Cs_ont_2g008120	yes|up	no|down	no|up	1
Cs_ont_2g033680	yes|up	yes|up	yes|up	3
Cs_ont_4g002360	no|up	yes|down	no|down	1
Cs_ont_1g007630	yes|up	no|up	yes|up	2
Cs_ont_2g001090	yes|up	no|down	no|up	1
Cs_ont_5g013220	no|down	yes|down	yes|down	2
Cs_ont_2g000850	yes|down	no|up	yes|down	2
Cs_ont_4g003940	yes|up	no|down	no|up	1
Cs_ont_4g003410	yes|up	yes|down	no|up	2
Cs_ont_5g022090	yes|up	no|down	no|up	1
Cs_ont_3g009530	yes|down	no|down	yes|down	2
Cs_ont_8g028700	yes|down	yes|up	no|up	2
Cs_ont_2g033350	no|up	yes|up	yes|up	2
Cs_ont_2g017980	no|down	yes|down	yes|down	2
Cs_ont_4g002090	yes|down	no|up	no|down	1
Cs_ont_8g018980	yes|down	no|up	no|down	1
Cs_ont_6g019380	yes|up	no|down	no|up	1
Cs_ont_8g020690	no|up	yes|up	yes|up	2
Cs_ont_3g005630	yes|down	no|up	no|down	1
Cs_ont_8g024390	yes|down	no|up	yes|down	2
Cs_ont_1g028570	no|down	yes|down	yes|down	2
Cs_ont_4g028450	no|up	no|up	yes|up	1
Cs_ont_5g045720	no|down	yes|down	yes|down	2
Cs_ont_1g022630	yes|down	no|down	yes|down	2
Cs_ont_4g027270	yes|down	no|up	yes|down	2
Cs_ont_4g023200	yes|up	yes|up	yes|up	3
Cs_ont_8g000340	no|up	yes|down	yes|down	2
Cs_ont_9g011890	yes|down	yes|down	yes|down	3
Cs_ont_9g003840	yes|down	no|up	no|up	1
Cs_ont_5g042660	yes|down	no|down	yes|down	2
Cs_ont_6g004400	yes|down	no|down	no|down	1
Cs_ont_7g020100	yes|down	no|up	yes|down	2
Cs_ont_2g001630	yes|down	no|down	no|down	1
Cs_ont_2g022050	no|down	yes|down	yes|down	2
Cs_ont_1g005030	yes|down	no|up	yes|down	2
Cs_ont_5g031530	yes|down	no|down	yes|down	2
Cs_ont_5g005280	yes|up	no|up	yes|up	2
Cs_ont_2g010400	yes|down	no|down	yes|down	2
Cs_ont_6g012710	no|down	no|up	yes|up	1
Cs_ont_3g014930	yes|down	yes|down	yes|down	3
Cs_ont_5g047760	no|up	yes|down	no|down	1
Cs_ont_5g047940	yes|down	yes|up	no|down	2
Cs_ont_8g004110	yes|up	no|up	yes|up	2
Cs_ont_2g005640	yes|down	no|up	no|down	1
Cs_ont_8g009340	yes|down	no|down	yes|down	2
Cs_ont_5g003620	yes|up	no|down	yes|up	2
Cs_ont_2g006100	no|up	no|up	yes|up	1
Cs_ont_3g023800	yes|down	yes|up	no|up	2
Cs_ont_1g009610	yes|down	no|up	yes|down	2
Cs_ont_6g007270	yes|up	no|up	yes|up	2
Cs_ont_1g024240	yes|down	no|up	yes|down	2
Cs_ont_1g028390	no|up	no|up	yes|up	1
Cs_ont_4g000830	yes|down	no|up	no|down	1
Cs_ont_3g030180	yes|down	no|down	no|down	1
Cs_ont_1g017210	no|up	no|up	yes|up	1
Cs_ont_2g011130	yes|up	no|down	yes|up	2
Cs_ont_1g010930	yes|down	yes|up	no|up	2
Cs_ont_1g023940	no|down	no|down	yes|down	1
Cs_ont_5g007280	yes|up	yes|down	no|up	2
Cs_ont_4g022000	no|down	no|up	yes|down	1
Cs_ont_9g000400	no|down	no|down	yes|down	1
Cs_ont_6g007180	yes|down	yes|up	no|down	2
Cs_ont_7g015520	yes|up	no|up	yes|up	2
Cs_ont_3g001530	yes|down	no|down	yes|down	2
Cs_ont_3g005850	no|up	no|up	yes|up	1
Cs_ont_2g005000	yes|down	no|up	yes|down	2
Cs_ont_7g004310	no|up	no|up	yes|up	1
Cs_ont_7g021500	yes|down	yes|up	no|up	2
Cs_ont_6g016450	yes|down	no|up	no|down	1
Cs_ont_9g011790	yes|down	no|down	no|down	1
Cs_ont_2g031440	yes|down	no|up	no|down	1
Cs_ont_6g018410	yes|up	no|down	no|up	1
Cs_ont_2g023830	yes|down	no|up	yes|down	2
Cs_ont_8g029080	no|down	no|down	yes|down	1
Cs_ont_8g019110	yes|down	yes|up	yes|down	3
Cs_ont_2g032080	no|up	no|up	yes|up	1
Cs_ont_5g002930	no|down	yes|up	yes|up	2
Cs_ont_9g017560	no|up	yes|up	yes|up	2
Cs_ont_3g028770	yes|down	no|up	no|down	1
Cs_ont_4g017390	yes|down	yes|down	yes|down	3
Cs_ont_7g028610	yes|up	no|up	yes|up	2
Cs_ont_3g022040	yes|down	no|down	yes|down	2
Cs_ont_8g018600	yes|down	no|down	no|down	1
Cs_ont_3g033200	yes|up	no|up	yes|up	2
Cs_ont_6g020790	no|down	no|down	yes|down	1
Cs_ont_2g017470	no|down	no|down	yes|down	1
Cs_ont_5g038210	yes|down	no|up	yes|down	2
Cs_ont_2g021880	yes|up	no|down	no|up	1
Cs_ont_8g026430	yes|down	no|up	no|down	1
Cs_ont_4g023640	yes|down	no|up	no|down	1
Cs_ont_2g003000	yes|down	no|up	no|down	1
Cs_ont_7g007240	no|down	yes|down	yes|down	2
Cs_ont_7g007710	yes|down	no|up	no|down	1
Cs_ont_5g019350	yes|up	no|up	yes|up	2
Cs_ont_2g005250	yes|down	no|up	yes|down	2
Cs_ont_2g002200	yes|down	yes|down	yes|down	3
Cs_ont_4g009930	yes|down	no|up	no|down	1
Cs_ont_6g004980	yes|down	no|up	no|down	1
Cs_ont_9g020850	yes|up	no|down	yes|up	2
Cs_ont_1g027440	yes|down	no|down	yes|down	2
Cs_ont_3g009310	no|down	no|down	yes|down	1
Cs_ont_7g008550	yes|up	no|down	no|down	1
Cs_ont_3g027630	yes|down	yes|up	no|down	2
Cs_ont_3g011510	yes|down	yes|down	yes|down	3
Cs_ont_2g025530	no|down	no|down	yes|down	1
Cs_ont_5g019170	yes|up	yes|up	yes|up	3
Cs_ont_2g033160	yes|up	no|up	yes|up	2
Cs_ont_7g028900	yes|up	no|down	yes|up	2
Cs_ont_5g026980	yes|down	no|up	no|down	1
Cs_ont_3g023640	yes|down	no|up	no|down	1
Cs_ont_1g027700	yes|up	no|up	yes|up	2
Cs_ont_8g012720	no|up	no|up	yes|up	1
Cs_ont_7g020290	no|up	no|up	yes|up	1
Cs_ont_4g016280	yes|down	no|down	yes|down	2
Cs_ont_5g000470	yes|down	no|down	yes|down	2
Cs_ont_5g049310	yes|up	no|up	yes|up	2
Cs_ont_7g019190	yes|up	no|down	no|up	1
Cs_ont_6g009250	yes|up	no|up	yes|up	2
Cs_ont_4g012440	yes|down	no|up	yes|down	2
Cs_ont_7g007860	yes|down	no|up	no|down	1
Cs_ont_5g033530	yes|down	no|down	yes|down	2
Cs_ont_2g027390	yes|down	no|down	yes|down	2
Cs_ont_5g039920	yes|down	yes|down	yes|down	3
Cs_ont_5g015080	no|up	no|up	yes|up	1
Cs_ont_6g000330	yes|down	no|down	no|down	1
Cs_ont_5g007840	yes|up	no|up	yes|up	2
Cs_ont_2g004120	yes|down	yes|up	no|up	2
Cs_ont_6g015530	yes|down	no|up	no|down	1
Cs_ont_7g019990	no|up	no|up	yes|up	1
Cs_ont_2g009420	yes|down	no|up	no|down	1
Cs_ont_9g016320	yes|up	no|up	yes|up	2
Cs_ont_4g012620	yes|down	no|down	yes|down	2
Cs_ont_6g001150	yes|up	no|down	yes|up	2
Cs_ont_1g008570	yes|up	no|up	yes|up	2
Cs_ont_3g004150	yes|down	no|up	no|down	1
Cs_ont_9g023740	yes|down	yes|up	yes|up	3
Cs_ont_3g005280	yes|down	yes|up	yes|down	3
Cs_ont_5g017240	yes|down	no|up	no|down	1
Cs_ont_1g028490	yes|up	no|down	no|up	1
Cs_ont_9g009600	no|down	no|down	yes|down	1
Cs_ont_7g013200	no|down	yes|down	yes|down	2
Cs_ont_8g005980	yes|down	no|up	yes|down	2
Cs_ont_3g008830	no|down	no|down	yes|down	1
Cs_ont_5g009410	yes|down	no|up	yes|down	2
Cs_ont_8g017770	yes|down	no|up	no|up	1
Cs_ont_7g017040	yes|down	no|down	no|down	1
Cs_ont_1g026470	no|down	no|down	yes|down	1
Cs_ont_4g018950	yes|down	no|up	yes|down	2
Cs_ont_7g015750	no|down	no|down	yes|down	1
Cs_ont_2g024870	yes|up	no|down	no|up	1
Cs_ont_8g020480	yes|up	no|down	no|up	1
Cs_ont_3g005460	yes|down	no|up	no|down	1
Cs_ont_3g021890	yes|down	no|up	yes|down	2
Cs_ont_4g019530	yes|down	no|down	no|down	1
Cs_ont_1g028720	yes|down	no|up	yes|down	2
Cs_ont_5g046370	no|up	no|up	yes|up	1
Cs_ont_7g024100	yes|down	no|up	yes|down	2
Cs_ont_7g017180	yes|down	no|up	yes|down	2
Cs_ont_5g041870	no|down	no|down	yes|down	1
Cs_ont_6g012540	no|up	no|up	yes|up	1
Cs_ont_8g009570	yes|up	no|up	yes|up	2
Cs_ont_8g000800	yes|down	yes|up	yes|down	3
Cs_ont_5g042780	yes|down	no|up	no|down	1
Cs_ont_5g036850	yes|down	no|up	no|down	1
Cs_ont_1g006860	yes|down	no|up	no|down	1
Cs_ont_5g005520	no|down	no|down	yes|down	1
Cs_ont_5g046150	yes|down	no|down	yes|down	2
Cs_ont_9g017790	yes|up	no|down	yes|up	2
Cs_ont_5g016040	yes|down	no|up	no|down	1
Cs_ont_5g006030	no|up	no|up	yes|up	1
Cs_ont_8g004580	yes|down	yes|up	no|down	2
Cs_ont_8g009750	yes|up	no|up	yes|up	2
Cs_ont_9g019260	no|up	no|up	yes|up	1
Cs_ont_9g003450	yes|down	yes|up	no|down	2
Cs_ont_6g025220	yes|down	yes|down	yes|down	3
Cs_ont_6g014500	no|up	yes|down	yes|down	2
Cs_ont_1g017020	no|no test	yes|down	yes|down	2
Cs_ont_7g014800	yes|up	no|up	yes|up	2
Cs_ont_4g009680	yes|up	no|down	yes|up	2
Cs_ont_4g027510	no|up	no|up	yes|up	1
Cs_ont_7g007520	yes|down	no|up	no|down	1
Cs_ont_2g020110	yes|down	no|down	yes|down	2
Cs_ont_2g034740	no|up	no|up	yes|up	1
Cs_ont_3g025170	no|down	no|down	yes|down	1
Cs_ont_9g020430	no|up	no|up	yes|up	1
Cs_ont_3g013260	yes|down	no|up	yes|down	2
Cs_ont_5g028110	no|down	yes|up	no|up	1
Cs_ont_7g006650	no|down	yes|up	yes|up	2
Cs_ont_3g016160	no|up	no|up	yes|up	1
Cs_ont_9g012450	no|up	no|up	yes|up	1
Cs_ont_6g002490	yes|down	no|up	no|down	1
Cs_ont_3g027820	yes|up	no|down	yes|up	2
Cs_ont_9g007600	yes|down	yes|up	no|up	2
Cs_ont_2g034290	no|up	yes|up	yes|up	2
Cs_ont_7g022190	no|down	yes|down	yes|down	2
Cs_ont_5g012210	yes|up	no|up	yes|up	2
Cs_ont_5g044710	yes|down	no|up	no|down	1
Cs_ont_3g013080	yes|down	yes|up	no|down	2
Cs_ont_2g017660	yes|down	no|up	no|down	1
Cs_ont_5g043170	yes|up	no|down	yes|up	2
Cs_ont_6g002270	yes|down	no|down	yes|down	2
Cs_ont_2g013740	yes|up	no|down	yes|up	2
Cs_ont_4g010390	yes|up	yes|up	yes|up	3
Cs_ont_1g019790	yes|down	no|down	yes|down	2
Cs_ont_2g006440	yes|down	no|up	no|up	1
Cs_ont_2g006190	yes|down	no|down	no|down	1
Cs_ont_4g015860	no|up	no|up	yes|up	1
Cs_ont_9g024770	no|up	yes|up	yes|up	2
Cs_ont_1g016770	no|down	yes|up	yes|up	2
Cs_ont_6g018080	yes|down	yes|down	yes|down	3
Cs_ont_1g026270	yes|up	no|down	yes|up	2
Cs_ont_3g013880	yes|down	no|down	yes|down	2
Cs_ont_2g002560	yes|down	no|up	no|down	1
Cs_ont_4g007880	yes|down	no|down	yes|down	2
Cs_ont_6g010440	no|down	no|down	yes|down	1
Cs_ont_7g013780	yes|down	yes|down	yes|down	3
Cs_ont_3g032940	yes|up	yes|up	yes|up	3
Cs_ont_4g006680	yes|down	no|up	yes|down	2
Cs_ont_7g008120	yes|down	no|down	yes|down	2
Cs_ont_2g020750	no|up	no|up	yes|up	1
Cs_ont_2g003610	no|down	no|down	yes|down	1
Cs_ont_5g037950	yes|up	no|down	yes|up	2
Cs_ont_9g008180	no|down	no|down	yes|down	1
Cs_ont_4g008030	yes|up	no|down	no|up	1
Cs_ont_9g005930	no|down	no|up	yes|down	1
Cs_ont_5g025090	no|up	no|up	yes|up	1
Cs_ont_6g013850	yes|up	no|up	yes|up	2
Cs_ont_8g003310	yes|down	no|up	no|down	1
Cs_ont_4g025110	no|down	no|down	yes|down	1
Cs_ont_5g004180	no|down	yes|down	yes|down	2
Cs_ont_5g026400	yes|up	no|down	no|up	1
Cs_ont_5g013460	no|down	no|down	yes|down	1
Cs_ont_3g002420	no|up	yes|up	yes|up	2
Cs_ont_3g002390	yes|down	no|down	yes|down	2
Cs_ont_5g030450	no|up	yes|down	no|down	1
Cs_ont_7g019520	yes|up	no|up	yes|up	2
Cs_ont_3g007610	yes|down	no|up	no|down	1
Cs_ont_8g017540	yes|down	yes|up	yes|down	3
Cs_ont_5g044830	yes|down	no|up	no|down	1
Cs_ont_3g011650	yes|up	no|down	no|up	1
Cs_ont_2g031910	yes|up	yes|up	yes|up	3
Cs_ont_3g022700	yes|up	no|down	yes|up	2
Cs_ont_5g048570	no|up	no|up	yes|up	1
Cs_ont_3g000860	no|up	no|up	yes|up	1
Cs_ont_9g025420	no|up	yes|up	yes|up	2
Cs_ont_6g020160	yes|down	no|up	no|down	1
Cs_ont_4g015700	yes|down	yes|up	yes|down	3
Cs_ont_8g013460	yes|down	no|down	yes|down	2
Cs_ont_5g013020	no|up	yes|up	yes|up	2
Cs_ont_5g044160	no|up	no|up	yes|up	1
Cs_ont_4g017410	no|up	yes|down	yes|down	2
Cs_ont_5g006850	no|up	yes|down	no|down	1
Cs_ont_7g028590	no|down	yes|up	no|up	1
Cs_ont_5g020110	no|down	no|down	yes|down	1
Cs_ont_6g019020	no|down	no|down	yes|down	1
Cs_ont_4g028290	yes|down	no|down	yes|down	2
Cs_ont_4g024570	yes|up	no|down	no|up	1
Cs_ont_1g022180	no|down	no|down	yes|down	1
Cs_ont_5g013790	yes|down	no|up	no|down	1
Cs_ont_4g003430	no|down	no|down	yes|down	1
Cs_ont_1g023580	no|up	no|up	yes|up	1
Cs_ont_8g028720	yes|up	no|up	yes|up	2
Cs_ont_7g028040	no|down	no|up	yes|down	1
Cs_ont_7g028730	yes|up	yes|up	yes|up	3
Cs_ont_6g019360	yes|up	yes|down	no|down	2
Cs_ont_5g011910	yes|down	yes|up	yes|down	3
Cs_ont_5g007980	no|down	yes|down	yes|down	2
Cs_ont_2g003960	yes|down	yes|up	no|up	2
Cs_ont_8g014650	yes|down	no|up	no|up	1
Cs_ont_7g014070	no|down	yes|down	yes|down	2
Cs_ont_6g011170	yes|up	yes|up	yes|up	3
Cs_ont_9g025310	no|up	no|up	yes|up	1
Cs_ont_6g003510	no|down	no|down	yes|down	1
Cs_ont_8g001320	no|up	no|up	yes|up	1
Cs_ont_8g029510	yes|down	no|up	no|down	1
Cs_ont_6g012480	yes|down	yes|up	no|down	2
Cs_ont_4g027210	yes|up	no|down	no|up	1
Cs_ont_6g022210	no|down	no|down	yes|down	1
Cs_ont_2g029890	yes|down	no|down	no|down	1
Cs_ont_2g025860	no|up	yes|up	yes|up	2
Cs_ont_3g020620	no|up	yes|down	no|down	1
Cs_ont_2g007470	no|down	yes|up	yes|up	2
Cs_ont_1g009580	no|up	yes|up	yes|up	2
Cs_ont_9g013000	yes|up	no|up	yes|up	2
Cs_ont_2g022070	yes|up	no|down	yes|up	2
Cs_ont_2g011200	no|up	yes|up	yes|up	2
Cs_ont_7g005520	no|down	yes|up	yes|up	2
Cs_ont_5g031800	yes|down	no|up	yes|down	2
Cs_ont_4g005300	yes|up	no|up	yes|up	2
Cs_ont_8g005840	yes|up	no|up	yes|up	2
Cs_ont_2g015100	no|down	no|down	yes|down	1
Cs_ont_4g012160	no|up	no|up	yes|up	1
Cs_ont_5g047920	yes|down	no|up	yes|down	2
Cs_ont_2g029090	yes|down	no|up	yes|down	2
Cs_ont_2g029760	yes|down	no|up	yes|down	2
Cs_ont_6g009880	yes|up	no|up	yes|up	2
Cs_ont_5g003600	no|down	yes|up	no|up	1
Cs_ont_5g034570	yes|up	no|up	yes|up	2
Cs_ont_2g011480	no|up	no|up	yes|up	1
Cs_ont_5g012510	yes|up	no|down	yes|up	2
Cs_ont_4g022240	yes|down	no|up	no|down	1
Cs_ont_2g012820	yes|down	no|down	yes|down	2
Cs_ont_8g024840	yes|up	no|down	no|up	1
Cs_ont_9g028070	yes|up	no|up	yes|up	2
Cs_ont_2g035760	yes|down	no|up	no|down	1
Cs_ont_5g045490	yes|up	no|down	no|up	1
Cs_ont_2g021180	yes|up	yes|up	yes|up	3
Cs_ont_4g001820	no|down	no|down	yes|down	1
Cs_ont_7g000920	yes|down	no|up	yes|down	2
Cs_ont_1g018180	no|down	yes|up	yes|up	2
Cs_ont_9g005320	yes|down	no|up	no|down	1
Cs_ont_7g017250	yes|up	no|down	no|up	1
Cs_ont_6g012150	yes|down	yes|down	yes|down	3
Cs_ont_7g010200	no|down	yes|up	no|up	1
Cs_ont_9g008400	yes|down	no|up	yes|down	2
Cs_ont_2g011150	yes|up	no|down	yes|up	2
Cs_ont_1g016540	yes|down	no|up	no|down	1
Cs_ont_1g010910	no|down	no|down	yes|down	1
Cs_ont_7g016120	no|up	no|up	yes|up	1
Cs_ont_6g013280	yes|down	yes|down	yes|down	3
Cs_ont_4g022790	no|down	yes|down	yes|down	2
Cs_ont_8g003670	yes|up	no|up	yes|up	2
Cs_ont_5g027790	yes|up	no|up	yes|up	2
Cs_ont_3g005870	yes|down	no|down	yes|down	2
Cs_ont_6g015870	no|down	no|up	yes|up	1
Cs_ont_1g002430	no|up	no|up	yes|up	1
Cs_ont_8g001810	yes|down	yes|down	yes|down	3
Cs_ont_5g024110	yes|down	no|up	yes|down	2
Cs_ont_3g018420	yes|up	no|down	yes|up	2
Cs_ont_2g000950	no|down	no|down	yes|down	1
Cs_ont_3g014950	yes|down	yes|down	yes|down	3
Cs_ont_2g006040	yes|down	yes|down	yes|down	3
Cs_ont_2g031460	yes|down	no|up	yes|down	2
Cs_ont_7g027270	no|down	no|down	yes|down	1
Cs_ont_6g013460	yes|down	yes|up	yes|up	3
Cs_ont_3g033040	yes|up	no|up	yes|up	2
Cs_ont_3g013740	yes|up	no|down	yes|up	2
Cs_ont_5g023830	no|up	no|up	yes|up	1
Cs_ont_5g027860	yes|down	yes|down	yes|down	3
Cs_ont_3g026830	no|up	no|up	yes|up	1
Cs_ont_4g019070	no|down	yes|up	no|up	1
Cs_ont_5g048270	yes|down	no|up	no|down	1
Cs_ont_2g015810	yes|up	no|down	no|up	1
Cs_ont_3g028280	yes|up	no|down	no|up	1
Cs_ont_5g006200	yes|down	no|down	yes|down	2
Cs_ont_8g018660	yes|down	no|up	no|down	1
Cs_ont_3g033220	yes|down	no|down	yes|down	2
Cs_ont_2g012680	no|down	yes|up	yes|up	2
Cs_ont_5g010230	yes|up	no|down	no|up	1
Cs_ont_7g001150	no|down	no|down	yes|down	1
Cs_ont_8g008740	no|up	yes|up	yes|up	2
Cs_ont_1g022210	yes|up	no|up	yes|up	2
Cs_ont_2g006050	no|up	yes|up	yes|up	2
Cs_ont_1g021300	yes|down	no|up	no|down	1
Cs_ont_6g021790	no|up	no|up	yes|up	1
Cs_ont_7g028650	yes|down	no|up	no|down	1
Cs_ont_2g034170	no|up	no|up	yes|up	1
Cs_ont_5g010200	yes|up	no|down	no|up	1
Cs_ont_9g013640	no|up	no|up	yes|up	1
Cs_ont_9g020870	yes|down	no|up	yes|down	2
Cs_ont_8g016080	no|up	no|up	yes|up	1
Cs_ont_7g020720	yes|down	no|up	no|down	1
Cs_ont_1g017820	yes|down	no|up	yes|down	2
Cs_ont_3g019460	no|up	no|up	yes|up	1
Cs_ont_8g002230	no|down	no|down	yes|down	1
Cs_ont_1g022370	yes|up	no|up	yes|up	2
Cs_ont_1g016910	yes|up	no|down	no|up	1
Cs_ont_3g011530	yes|down	yes|up	no|up	2
Cs_ont_1g024910	yes|down	no|up	yes|down	2
Cs_ont_2g028760	yes|down	yes|up	no|up	2
Cs_ont_3g029080	yes|down	no|down	yes|down	2
Cs_ont_7g023030	yes|up	no|up	yes|up	2
Cs_ont_6g000130	yes|down	yes|down	yes|down	3
Cs_ont_1g016340	yes|down	yes|down	yes|down	3
Cs_ont_8g019530	yes|down	no|up	no|up	1
Cs_ont_9g018340	yes|down	yes|up	no|up	2
Cs_ont_7g003030	yes|down	yes|down	yes|down	3
Cs_ont_9g015520	no|down	no|down	yes|down	1
Cs_ont_4g006740	yes|down	no|up	yes|down	2
Cs_ont_2g013550	yes|down	no|up	no|down	1
Cs_ont_7g026600	no|down	yes|down	yes|down	2
Cs_ont_3g003270	no|down	yes|up	no|up	1
Cs_ont_4g012420	yes|down	no|up	yes|down	2
Cs_ont_3g011790	yes|down	no|up	yes|down	2
Cs_ont_8g007770	yes|down	yes|down	yes|down	3
Cs_ont_5g039940	yes|up	yes|up	yes|up	3
Cs_ont_6g001080	yes|up	no|down	yes|up	2
Cs_ont_3g029660	yes|down	yes|up	no|up	2
Cs_ont_1g018320	yes|up	no|up	yes|up	2
Cs_ont_6g004300	yes|down	no|up	yes|down	2
Cs_ont_5g017000	yes|down	no|up	no|down	1
Cs_ont_3g004350	no|down	no|down	yes|down	1
Cs_ont_3g015230	no|down	yes|up	no|up	1
Cs_ont_3g008580	no|up	yes|down	yes|down	2
Cs_ont_1g000570	no|down	yes|up	yes|up	2
Cs_ont_2g009440	yes|up	no|down	no|up	1
Cs_ont_1g026820	yes|down	no|up	no|up	1
Cs_ont_7g021890	yes|down	no|down	yes|down	2
Cs_ont_7g010780	yes|up	no|down	yes|up	2
Cs_ont_4g008950	no|up	yes|up	yes|up	2
Cs_ont_5g015350	yes|up	no|down	yes|up	2
Cs_ont_1g023350	no|down	yes|down	yes|down	2
Cs_ont_8g021440	no|up	yes|up	no|up	1
Cs_ont_8g002310	no|down	no|down	yes|down	1
Cs_ont_3g005260	yes|down	no|down	yes|down	2
Cs_ont_8g024450	no|up	yes|up	yes|up	2
Cs_ont_4g028080	yes|up	yes|up	yes|up	3
Cs_ont_9g009330	no|up	no|up	yes|up	1
Cs_ont_3g003850	yes|up	no|down	yes|up	2
Cs_ont_5g009470	yes|down	no|up	no|down	1
Cs_ont_2g017080	yes|down	no|up	no|down	1
Cs_ont_1g011320	yes|down	no|down	no|down	1
Cs_ont_2g027910	yes|down	no|down	yes|down	2
Cs_ont_5g001320	yes|down	no|down	yes|down	2
Cs_ont_1g026450	yes|up	no|no test	yes|up	2
Cs_ont_3g009180	yes|up	no|up	yes|up	2
Cs_ont_6g014420	yes|down	no|up	no|down	1
Cs_ont_3g005550	yes|up	no|up	yes|up	2
Cs_ont_9g001650	no|down	no|down	yes|down	1
Cs_ont_8g000430	no|down	no|down	yes|down	1
Cs_ont_3g005400	yes|down	no|up	no|down	1
Cs_ont_6g011610	yes|down	yes|up	no|down	2
Cs_ont_9g006910	yes|down	no|up	yes|down	2
Cs_ont_5g043230	no|up	yes|down	no|down	1
Cs_ont_6g003300	yes|down	no|down	yes|down	2
Cs_ont_5g049730	yes|down	no|up	yes|down	2
Cs_ont_7g024120	no|down	no|down	yes|down	1
Cs_ont_1g024570	no|down	yes|down	yes|down	2
Cs_ont_5g041500	yes|up	no|down	no|up	1
Cs_ont_6g016860	yes|up	no|up	yes|up	2
Cs_ont_4g017600	yes|up	no|up	yes|up	2
Cs_ont_5g022460	yes|down	yes|down	yes|down	3
Cs_ont_2g025980	no|down	yes|down	yes|down	2
Cs_ont_1g025560	yes|down	yes|up	no|down	2
Cs_ont_2g008710	no|up	yes|down	yes|down	2
Cs_ont_5g036870	no|up	yes|up	yes|up	2
Cs_ont_4g002440	yes|down	no|down	yes|down	2
Cs_ont_9g026530	yes|up	yes|up	yes|up	3
Cs_ont_5g014000	yes|down	no|up	yes|down	2
Cs_ont_2g015640	yes|up	no|up	yes|up	2
Cs_ont_4g005460	yes|up	yes|down	no|down	2
Cs_ont_5g002210	yes|up	no|down	yes|up	2
Cs_ont_1g010050	no|down	no|down	yes|down	1
Cs_ont_4g009330	yes|up	no|down	yes|up	2
Cs_ont_5g042580	yes|down	no|up	no|down	1
Cs_ont_1g005130	no|up	no|up	yes|up	1
Cs_ont_2g019150	yes|up	no|down	yes|up	2
Cs_ont_4g027680	no|up	no|up	yes|up	1
Cs_ont_6g022660	yes|up	no|up	yes|up	2
Cs_ont_4g000810	no|down	yes|up	no|up	1
Cs_ont_2g025180	yes|down	yes|down	yes|down	3
Cs_ont_2g008670	no|down	yes|down	yes|down	2
Cs_ont_1g024350	no|up	yes|down	no|down	1
Cs_ont_2g034010	no|down	yes|down	yes|down	2
Cs_ont_5g045990	yes|down	no|down	yes|down	2
Cs_ont_1g015530	no|down	no|down	yes|down	1
Cs_ont_9g012870	yes|down	no|up	yes|down	2
Cs_ont_9g026110	yes|up	no|down	no|up	1
Cs_ont_1g020440	no|down	no|down	yes|down	1
Cs_ont_7g003170	yes|up	no|down	no|up	1
Cs_ont_4g001360	no|down	yes|up	yes|up	2
Cs_ont_9g013340	yes|down	no|up	no|up	1
Cs_ont_1g012070	no|down	no|down	yes|down	1
Cs_ont_1g017000	no|down	yes|up	yes|up	2
Cs_ont_7g014860	yes|down	no|up	yes|down	2
Cs_ont_3g006980	no|up	yes|up	yes|up	2
Cs_ont_8g027150	yes|down	no|down	yes|down	2
Cs_ont_5g013180	no|down	no|up	yes|up	1
Cs_ont_7g026040	no|down	no|down	yes|down	1
Cs_ont_7g029090	yes|up	yes|up	yes|up	3
Cs_ont_9g007760	yes|down	no|up	no|down	1
Cs_ont_7g001990	yes|down	no|down	yes|down	2
Cs_ont_2g019180	yes|up	no|up	yes|up	2
Cs_ont_9g003650	no|down	yes|up	yes|up	2
Cs_ont_3g013240	yes|down	no|up	yes|down	2
Cs_ont_3g013530	no|down	no|down	yes|down	1
Cs_ont_5g027650	no|up	no|up	yes|up	1
Cs_ont_4g016890	no|up	no|up	yes|up	1
Cs_ont_6g015110	yes|down	yes|up	no|up	2
Cs_ont_3g019670	yes|down	no|up	no|up	1
Cs_ont_5g017190	yes|down	no|up	yes|down	2
Cs_ont_2g014210	no|down	no|down	yes|down	1
Cs_ont_5g047590	yes|down	no|down	yes|down	2
Cs_ont_8g022520	no|up	yes|up	yes|up	2
Cs_ont_8g000680	no|down	no|down	yes|down	1
Cs_ont_6g021360	yes|down	yes|up	no|down	2
Cs_ont_5g003160	no|up	no|up	yes|up	1
Cs_ont_2g007130	no|down	yes|up	no|up	1
Cs_ont_8g000970	no|down	no|up	yes|down	1
Cs_ont_5g038920	yes|up	no|down	yes|up	2
Cs_ont_6g007530	yes|down	no|down	yes|down	2
Cs_ont_9g028240	no|up	no|up	yes|up	1
Cs_ont_5g050140	yes|down	no|up	no|down	1
Cs_ont_5g050630	yes|down	no|up	no|down	1
Cs_ont_2g003900	yes|down	yes|up	yes|up	3
Cs_ont_4g020300	yes|down	yes|up	no|no test	2
Cs_ont_9g008210	yes|down	no|up	yes|down	2
Cs_ont_6g005970	yes|down	no|up	no|down	1
Cs_ont_5g015630	yes|up	no|up	yes|up	2
Cs_ont_1g026210	no|up	yes|up	yes|up	2
Cs_ont_5g007090	yes|down	no|up	yes|down	2
Cs_ont_8g003080	yes|up	no|down	no|up	1
Cs_ont_1g015950	yes|down	no|up	yes|down	2
Cs_ont_6g010420	yes|down	no|up	no|down	1
Cs_ont_1g025550	yes|down	yes|up	no|up	2
Cs_ont_8g026350	yes|down	no|up	no|down	1
Cs_ont_7g007100	yes|down	yes|up	no|up	2
Cs_ont_5g021080	yes|up	no|up	yes|up	2
Cs_ont_1g006580	yes|up	no|down	no|down	1
Cs_ont_6g017510	no|down	yes|up	yes|up	2
Cs_ont_7g027020	yes|down	yes|down	yes|down	3
Cs_ont_9g000350	yes|down	no|up	no|down	1
Cs_ont_5g040060	no|up	yes|down	yes|down	2
Cs_ont_7g015010	yes|down	no|up	no|down	1
Cs_ont_3g011780	yes|down	no|up	yes|down	2
Cs_ont_4g025170	no|down	yes|down	yes|down	2
Cs_ont_1g028910	no|up	no|up	yes|up	1
Cs_ont_2g016580	no|down	no|down	yes|down	1
Cs_ont_7g023730	yes|down	yes|up	no|down	2
Cs_ont_9g024050	yes|up	no|up	yes|up	2
Cs_ont_3g016850	yes|up	no|up	yes|up	2
Cs_ont_6g006770	no|down	no|down	yes|down	1
Cs_ont_8g017560	no|down	no|down	yes|down	1
Cs_ont_5g001130	yes|up	no|up	yes|up	2
Cs_ont_4g018570	yes|up	no|up	yes|up	2
Cs_ont_9g025440	yes|up	yes|down	no|up	2
Cs_ont_5g048100	yes|down	no|up	no|down	1
Cs_ont_4g015720	yes|down	no|up	no|down	1
Cs_ont_2g001850	no|up	no|up	yes|up	1
Cs_ont_1g003740	yes|down	no|up	no|down	1
Cs_ont_5g013000	yes|down	no|up	no|down	1
Cs_ont_7g002410	yes|down	no|up	no|down	1
Cs_ont_4g003630	yes|up	no|down	yes|up	2
Cs_ont_7g009270	yes|down	no|down	yes|down	2
Cs_ont_1g013800	yes|up	no|up	yes|up	2
Cs_ont_5g019520	no|up	yes|up	yes|up	2
Cs_ont_2g005770	yes|down	yes|up	no|down	2
Cs_ont_2g033640	no|up	no|up	yes|up	1
Cs_ont_8g006410	yes|down	no|up	no|up	1
Cs_ont_6g020340	no|down	no|down	yes|down	1
Cs_ont_1g009830	no|up	no|up	yes|up	1
Cs_ont_4g010210	yes|up	no|up	yes|up	2
Cs_ont_6g019000	no|up	no|up	yes|up	1
Cs_ont_4g028270	no|down	no|down	yes|down	1
Cs_ont_4g024550	no|up	no|up	yes|up	1
Cs_ont_9g009100	yes|down	no|down	yes|down	2
Cs_ont_4g003980	yes|up	no|up	yes|up	2
Cs_ont_7g018760	yes|up	no|down	no|up	1
Cs_ont_6g014890	yes|up	no|down	yes|up	2
Cs_ont_8g028740	yes|up	yes|up	yes|up	3
Cs_ont_1g015320	yes|down	no|down	yes|down	2
Cs_ont_7g028710	no|down	no|down	yes|down	1
Cs_ont_8g015450	no|up	no|up	yes|up	1
Cs_ont_2g026160	no|up	yes|up	yes|up	2
Cs_ont_6g019340	yes|up	no|down	no|up	1
Cs_ont_1g027130	yes|down	no|up	no|down	1
Cs_ont_7g011570	yes|down	no|down	yes|down	2
Cs_ont_6g011110	yes|up	no|up	yes|up	2
Cs_ont_4g006000	yes|down	yes|up	yes|down	3
Cs_ont_6g003820	no|up	no|up	yes|up	1
Cs_ont_7g018840	no|up	no|up	yes|up	1
Cs_ont_3g003130	yes|down	no|down	no|down	1
Cs_ont_3g024760	yes|down	no|up	yes|down	2
Cs_ont_3g010180	yes|up	no|up	yes|up	2
Cs_ont_2g025660	yes|down	no|up	no|down	1
Cs_ont_4g018050	yes|up	no|up	yes|up	2
Cs_ont_5g039130	no|down	no|up	yes|up	1
Cs_ont_5g012750	yes|up	no|up	yes|up	2
Cs_ont_9g026490	no|down	yes|down	yes|down	2
Cs_ont_7g020140	no|up	no|up	yes|up	1
Cs_ont_6g015270	no|down	yes|up	no|up	1
Cs_ont_5g031860	yes|down	yes|up	no|up	2
Cs_ont_3g027070	yes|down	yes|up	no|up	2
Cs_ont_9g027010	yes|down	yes|up	no|down	2
Cs_ont_5g009590	yes|up	no|up	yes|up	2
Cs_ont_9g021910	yes|down	no|up	no|down	1
Cs_ont_8g027430	no|up	no|up	yes|up	1
Cs_ont_7g010190	yes|up	no|down	no|up	1
Cs_ont_5g003370	yes|down	no|down	yes|down	2
Cs_ont_5g036480	yes|down	no|up	yes|down	2
Cs_ont_3g031890	no|down	yes|up	yes|up	2
Cs_ont_5g012580	yes|down	no|up	no|down	1
Cs_ont_2g017340	no|up	yes|up	yes|up	2
Cs_ont_1g014050	no|down	yes|down	yes|down	2
Cs_ont_4g001800	yes|down	yes|up	no|up	2
Cs_ont_1g021470	no|down	yes|down	yes|down	2
Cs_ont_3g024180	no|down	no|down	yes|down	1
Cs_ont_3g006400	no|up	yes|down	yes|down	2
Cs_ont_8g027380	no|down	yes|up	yes|up	2
Cs_ont_9g005300	no|down	no|down	yes|down	1
Cs_ont_7g017500	yes|up	yes|up	yes|up	3
Cs_ont_3g010450	yes|down	yes|up	no|up	2
Cs_ont_6g018830	yes|up	no|down	no|up	1
Cs_ont_8g009150	no|down	no|down	yes|down	1
Cs_ont_4g008780	yes|down	yes|up	no|down	2
Cs_ont_9g003220	no|down	yes|down	yes|down	2
Cs_ont_1g023900	no|up	no|up	yes|up	1
Cs_ont_1g029460	no|down	no|down	yes|down	1
Cs_ont_3g013180	yes|down	yes|down	yes|down	3
Cs_ont_6g008910	yes|down	no|down	yes|down	2
Cs_ont_5g028090	yes|up	no|up	yes|up	2
Cs_ont_5g002640	no|up	no|up	yes|up	1
Cs_ont_4g019890	yes|down	no|up	no|down	1
Cs_ont_5g046500	yes|down	yes|up	no|up	2
Cs_ont_7g013550	no|up	yes|up	yes|up	2
Cs_ont_5g046050	yes|down	no|up	yes|down	2
Cs_ont_1g011990	yes|down	no|up	no|down	1
Cs_ont_9g017610	no|down	no|down	yes|down	1
Cs_ont_3g018400	yes|down	no|up	no|down	1
Cs_ont_5g024460	no|up	no|up	yes|up	1
Cs_ont_3g014750	no|up	no|up	yes|up	1
Cs_ont_2g029740	yes|down	no|up	yes|down	2
Cs_ont_6g013400	yes|up	no|up	yes|up	2
Cs_ont_3g017400	no|down	no|down	yes|down	1
Cs_ont_5g040900	yes|up	no|up	yes|up	2
Cs_ont_3g013760	no|down	yes|up	yes|up	2
Cs_ont_2g017780	yes|up	no|up	yes|up	2
Cs_ont_3g026580	yes|down	no|down	yes|down	2
Cs_ont_9g006760	yes|down	yes|up	no|down	2
Cs_ont_4g001770	yes|down	no|up	no|down	1
Cs_ont_3g012580	yes|down	yes|down	yes|down	3
Cs_ont_1g012190	no|down	yes|down	yes|down	2
Cs_ont_5g024790	yes|down	no|up	no|down	1
Cs_ont_3g016200	yes|down	yes|up	no|down	2
Cs_ont_2g016780	yes|down	no|down	yes|down	2
Cs_ont_2g011170	yes|up	no|down	yes|up	2
Cs_ont_4g013830	yes|up	no|up	yes|up	2
Cs_ont_8g029530	yes|down	yes|up	no|up	2
Cs_ont_7g003610	no|down	no|down	yes|down	1
Cs_ont_7g003340	yes|up	no|down	yes|up	2
Cs_ont_8g008010	yes|up	no|down	no|up	1
Cs_ont_7g011370	no|down	yes|up	yes|up	2
Cs_ont_5g016530	no|down	no|down	yes|down	1
Cs_ont_7g008730	yes|down	yes|up	no|up	2
Cs_ont_9g015190	no|down	no|down	yes|down	1
Cs_ont_5g011280	yes|up	no|down	yes|up	2
Cs_ont_4g023960	yes|down	yes|up	yes|up	3
Cs_ont_9g011750	yes|up	no|up	yes|up	2
Cs_ont_4g025090	yes|down	no|up	no|down	1
Cs_ont_6g024720	no|down	yes|down	yes|down	2
Cs_ont_7g020700	yes|up	no|down	no|up	1
Cs_ont_8g000280	yes|down	no|down	yes|down	2
Cs_ont_3g019110	no|up	no|up	yes|up	1
Cs_ont_4g009550	yes|down	no|up	no|down	1
Cs_ont_2g022650	yes|down	yes|up	no|down	2
Cs_ont_5g029050	yes|down	no|down	yes|down	2
Cs_ont_9g022490	yes|up	no|down	no|up	1
Cs_ont_8g022260	yes|down	yes|up	no|up	2
Cs_ont_9g011280	yes|down	no|up	yes|down	2
Cs_ont_6g021110	no|up	no|up	yes|up	1
Cs_ont_2g028740	yes|up	yes|up	yes|up	3
Cs_ont_6g005890	yes|up	no|up	yes|up	2
Cs_ont_6g019810	yes|down	no|up	no|down	1
Cs_ont_3g022000	yes|down	yes|up	no|up	2
Cs_ont_4g011290	no|up	yes|up	yes|up	2
Cs_ont_5g035900	no|up	no|up	yes|up	1
Cs_ont_3g023600	yes|down	no|up	no|down	1
Cs_ont_7g004590	yes|down	no|up	no|up	1
Cs_ont_5g030370	yes|down	no|up	yes|down	2
Cs_ont_3g032510	no|down	no|down	yes|down	1
Cs_ont_2g018960	yes|down	no|up	no|down	1
Cs_ont_7g025520	no|up	no|up	yes|up	1
Cs_ont_4g012400	yes|up	no|down	no|up	1
Cs_ont_3g008350	no|down	no|down	yes|down	1
Cs_ont_8g022910	yes|down	no|up	yes|down	2
Cs_ont_5g039960	yes|up	no|up	yes|up	2
Cs_ont_1g008680	yes|up	no|up	yes|up	2
Cs_ont_2g002240	yes|up	no|up	yes|up	2
Cs_ont_9g002730	yes|down	yes|down	yes|down	3
Cs_ont_7g019480	yes|down	no|up	yes|down	2
Cs_ont_3g008560	no|up	yes|down	yes|down	2
Cs_ont_8g029350	yes|down	yes|up	no|up	2
Cs_ont_2g032700	yes|down	no|down	yes|down	2
Cs_ont_4g008970	yes|down	no|up	no|down	1
Cs_ont_1g027110	no|up	no|up	yes|up	1
Cs_ont_9g014710	no|up	no|up	yes|up	1
Cs_ont_8g021460	no|up	yes|up	no|up	1
Cs_ont_8g014930	yes|up	no|up	yes|up	2
Cs_ont_6g004140	yes|up	no|up	yes|up	2
Cs_ont_8g020730	no|down	yes|down	yes|down	2
Cs_ont_5g017280	yes|down	no|down	yes|down	2
Cs_ont_1g022820	yes|down	no|up	no|down	1
Cs_ont_3g022920	yes|up	no|up	yes|up	2
Cs_ont_3g011110	no|down	no|down	yes|down	1
Cs_ont_4g017590	yes|down	yes|up	yes|up	3
Cs_ont_4g023490	yes|down	yes|up	no|up	2
Cs_ont_3g022910	yes|down	no|up	no|down	1
Cs_ont_7g027530	no|down	no|up	yes|up	1
Cs_ont_6g014400	yes|down	yes|up	no|down	2
Cs_ont_2g002860	yes|down	no|up	no|down	1
Cs_ont_5g045420	yes|up	no|down	yes|up	2
Cs_ont_5g048840	yes|down	no|down	yes|down	2
Cs_ont_1g009330	yes|down	no|down	yes|down	2
Cs_ont_6g000370	no|down	yes|down	yes|down	2
Cs_ont_6g014920	yes|up	no|down	yes|up	2
Cs_ont_5g043210	yes|up	no|up	yes|up	2
Cs_ont_8g001460	yes|down	no|up	yes|down	2
Cs_ont_2g010780	no|up	no|up	yes|up	1
Cs_ont_2g000710	yes|down	no|up	yes|down	2
Cs_ont_4g003840	no|up	no|up	yes|up	1
Cs_ont_2g029970	no|up	no|up	yes|up	1
Cs_ont_8g009820	yes|down	yes|up	no|up	2
Cs_ont_6g014660	yes|down	no|up	no|down	1
Cs_ont_2g033070	yes|up	yes|down	no|up	2
Cs_ont_3g031150	yes|down	yes|up	yes|down	3
Cs_ont_4g002460	yes|down	no|up	yes|down	2
Cs_ont_9g023070	no|down	yes|up	yes|up	2
Cs_ont_1g007420	yes|up	no|up	yes|up	2
Cs_ont_8g005360	yes|down	no|up	yes|down	2
Cs_ont_5g002760	no|up	yes|up	yes|up	2
Cs_ont_4g005440	no|up	no|up	yes|up	1
Cs_ont_4g009310	yes|up	no|down	no|up	1
Cs_ont_9g002090	yes|down	yes|up	no|up	2
Cs_ont_2g019170	yes|down	no|down	yes|down	2
Cs_ont_9g024950	yes|down	no|down	yes|down	2
Cs_ont_1g024370	yes|up	no|up	yes|up	2
Cs_ont_7g016350	no|down	yes|up	yes|up	2
Cs_ont_1g020460	yes|down	no|down	yes|down	2
Cs_ont_3g001740	yes|up	no|down	no|up	1
Cs_ont_3g001960	yes|down	yes|up	yes|down	3
Cs_ont_6g011630	no|down	yes|up	no|up	1
Cs_ont_1g012050	yes|down	no|down	yes|down	2
Cs_ont_1g021220	yes|down	no|down	yes|down	2
Cs_ont_3g006210	yes|up	no|up	yes|up	2
Cs_ont_1g029410	no|down	no|down	yes|down	1
Cs_ont_2g029350	yes|down	no|down	yes|down	2
Cs_ont_6g005980	no|up	no|up	yes|up	1
Cs_ont_3g020450	no|down	yes|up	yes|up	2
Cs_ont_7g025670	yes|down	no|up	yes|down	2
[truncated: 5,311 more rows]

## Sheet: Table S4
Table S4 KEGG enrichment analysis of differentially expressed genes (DEGs) that compared among the different developmental stages.
Num	Pathway id	Description	Pvalue	Padjust	First Category	Second Category	Gene_ids
21	map04146	Peroxisome	0.961801	1	Cellular Processes	Transport and catabolism	Cs_ont_1g000600|Cs_ont_4g008220|Cs_ont_8g006180|Cs_ont_9g009140|Cs_ont_8g007560|Cs_ont_3g016380|Cs_ont_5g006610|Cs_ont_8g007580|Cs_ont_4g000850|Cs_ont_3g017660|Cs_ont_2g004050|Cs_ont_2g027280|Cs_ont_3g001020|Cs_ont_2g031290|Cs_ont_5g042580|Cs_ont_3g016120|Cs_ont_5g013300|Cs_ont_9g003840|Cs_ont_7g013930|Cs_ont_7g027430|Cs_ont_8g022970
39	map04144	Endocytosis	0.709067	1			Cs_ont_8g027770|Cs_ont_8g002910|Cs_ont_9g021750|Cs_ont_1g020320|Cs_ont_5g040750|Cs_ont_4g022550|Cs_ont_1g010810|Cs_ont_8g002730|Cs_ont_7g003890|Cs_ont_8g003290|Cs_ont_1g010380|Cs_ont_2g005870|Cs_ont_4g009690|Cs_ont_2g001140|Cs_ont_7g003830|Cs_ont_7g026940|Cs_ont_3g031280|Cs_ont_6g017960|Cs_ont_1g016340|Cs_ont_5g024310|Cs_ont_2g000770|Cs_ont_6g022170|Cs_ont_5g017000|Cs_ont_5g024180|Cs_ont_7g003880…
4	map04136	Autophagy - other	0.996585	1			Cs_ont_2g001800|Cs_ont_9g000450|Cs_ont_2g001790|Cs_ont_5g005510
16	map04145	Phagosome	0.916367	1			Cs_ont_1g016340|Cs_ont_1g002630|Cs_ont_2g008190|Cs_ont_5g047940|Cs_ont_8g028220|Cs_ont_8g027860|Cs_ont_3g002000|Cs_ont_6g001370|Cs_ont_4g008410|Cs_ont_2g012630|Cs_ont_6g020250|Cs_ont_8g001310|Cs_ont_6g001360|Cs_ont_5g011190|Cs_ont_4g007860|Cs_ont_6g024400
115	map04075	Plant hormone signal transduction	4.46e-06	0.00029429	Environmental Information Processing	Signal transduction	Cs_ont_1g019000|Cs_ont_2g006020|Cs_ont_2g013070|Cs_ont_9g017220|Cs_ont_5g046500|Cs_ont_1g017070|Cs_ont_4g026490|Cs_ont_9g006910|Cs_ont_8g007750|Cs_ont_8g025140|Cs_ont_5g012720|Cs_ont_1g018990|Cs_ont_6g013980|Cs_ont_5g041710|Cs_ont_7g003190|Cs_ont_8g019380|Cs_ont_5g030560|Cs_ont_3g004950|Cs_ont_1g017520|Cs_ont_7g014320|Cs_ont_7g002120|Cs_ont_4g002310|Cs_ont_7g014520|Cs_ont_7g019670|Cs_ont_5g008520…
64	map04016	MAPK signaling pathway - plant	0.000142477	0.0037614			Cs_ont_5g018270|Cs_ont_1g029150|Cs_ont_3g015480|Cs_ont_5g043390|Cs_ont_7g015760|Cs_ont_9g024420|Cs_ont_1g017520|Cs_ont_9g007600|Cs_ont_5g003720|Cs_ont_8g027120|Cs_ont_5g007730|Cs_ont_8g028710|Cs_ont_3g009950|Cs_ont_5g015000|Cs_ont_9g024600|Cs_ont_4g011390|Cs_ont_9g001210|Cs_ont_5g048560|Cs_ont_1g019670|Cs_ont_3g009990|Cs_ont_1g020400|Cs_ont_8g001810|Cs_ont_6g013740|Cs_ont_3g001020|Cs_ont_6g013730…
26	map04070	Phosphatidylinositol signaling system	0.0476027	0.00766208			Cs_ont_1g005550|Cs_ont_6g000560|Cs_ont_8g026860|Cs_ont_8g027930|Cs_ont_1g020890|Cs_ont_5g039180|Cs_ont_3g009950|Cs_ont_4g026810|Cs_ont_1g024450|Cs_ont_5g015000|Cs_ont_9g001210|Cs_ont_4g015750|Cs_ont_2g009410|Cs_ont_3g003310|Cs_ont_6g000990|Cs_ont_8g000640|Cs_ont_9g020220|Cs_ont_7g001470|Cs_ont_7g017890|Cs_ont_9g001220|Cs_ont_8g000630|Cs_ont_3g024850|Cs_ont_3g012760|Cs_ont_2g012630|Cs_ont_2g020760…
44	map02010	ABC transporters	0.000638506	0.161117		Membrane transport	Cs_ont_5g048950|Cs_ont_1g015070|Cs_ont_6g002200|Cs_ont_7g004310|Cs_ont_1g015040|Cs_ont_2g002920|Cs_ont_5g042210|Cs_ont_1g021480|Cs_ont_9g026860|Cs_ont_9g000400|Cs_ont_2g031800|Cs_ont_1g015020|Cs_ont_6g018540|Cs_ont_4g020230|Cs_ont_8g015830|Cs_ont_1g015060|Cs_ont_4g009150|Cs_ont_3g002010|Cs_ont_6g007640|Cs_ont_8g015870|Cs_ont_1g014990|Cs_ont_6g007620|Cs_ont_4g003330|Cs_ont_2g007790|Cs_ont_5g027750…
21	map03030	DNA replication	0.0089642	0.0514467	Genetic Information Processing	Replication and repair	Cs_ont_9g009170|Cs_ont_9g002270|Cs_ont_3g031130|Cs_ont_9g009520|Cs_ont_4g019930|Cs_ont_7g024280|Cs_ont_8g021280|Cs_ont_5g043040|Cs_ont_6g010160|Cs_ont_7g022300|Cs_ont_7g028230|Cs_ont_6g017050|Cs_ont_5g001760|Cs_ont_5g005320|Cs_ont_1g021520|Cs_ont_9g026490|Cs_ont_1g004680|Cs_ont_5g020610|Cs_ont_3g009930|Cs_ont_8g007840|Cs_ont_2g003890|Cs_ont_9g020820|Cs_ont_7g003870|Cs_ont_1g016830|Cs_ont_6g008710…
19	map03440	Homologous recombination	0.0837648	0.263261			Cs_ont_8g024520|Cs_ont_1g003240|Cs_ont_7g027880|Cs_ont_1g006260|Cs_ont_8g020480|Cs_ont_2g007510|Cs_ont_7g017220|Cs_ont_7g002080|Cs_ont_6g013930|Cs_ont_4g025970|Cs_ont_3g027820|Cs_ont_3g000890|Cs_ont_4g022690|Cs_ont_5g007280|Cs_ont_5g043490|Cs_ont_5g038620|Cs_ont_5g012510|Cs_ont_1g005980|Cs_ont_6g008510
10	map03430	Mismatch repair	0.274878	0.541551			Cs_ont_8g001250|Cs_ont_5g040410|Cs_ont_2g005270|Cs_ont_7g017220|Cs_ont_2g002990|Cs_ont_4g025970|Cs_ont_6g008510|Cs_ont_5g038620|Cs_ont_1g005980|Cs_ont_3g008940
10	map03410	Base excision repair	0.733177	1			Cs_ont_2g010520|Cs_ont_8g001250|Cs_ont_8g016370|Cs_ont_8g007700|Cs_ont_8g007390|Cs_ont_7g017220|Cs_ont_5g029020|Cs_ont_3g008990|Cs_ont_9g028560|Cs_ont_1g005980
11	map03420	Nucleotide excision repair	0.976562	1			Cs_ont_3g016630|Cs_ont_8g001250|Cs_ont_5g040410|Cs_ont_8g007390|Cs_ont_7g017220|Cs_ont_5g029020|Cs_ont_4g025970|Cs_ont_6g008510|Cs_ont_5g038620|Cs_ont_1g005980|Cs_ont_3g008940
78	map03010	Ribosome	0.91962	1		Translation	Cs_ont_9g009170|Cs_ont_9g002270|Cs_ont_3g031130|Cs_ont_9g009520|Cs_ont_4g019930|Cs_ont_7g024280|Cs_ont_8g021280|Cs_ont_5g043040|Cs_ont_6g010160|Cs_ont_7g022300|Cs_ont_7g028230|Cs_ont_6g017050|Cs_ont_5g001760|Cs_ont_5g005320|Cs_ont_1g021520|Cs_ont_9g026490|Cs_ont_1g004680|Cs_ont_5g020610|Cs_ont_3g009930|Cs_ont_8g007840|Cs_ont_2g003890|Cs_ont_9g020820|Cs_ont_7g003870|Cs_ont_1g016830|Cs_ont_6g008710…
8	map03013	Nucleocytoplasmic transport	1	1			Cs_ont_8g006740|Cs_ont_1g011990|Cs_ont_7g022340|Cs_ont_5g010230|Cs_ont_6g017900|Cs_ont_3g014600|Cs_ont_6g004680|Cs_ont_7g004040
17	map03015	mRNA surveillance pathway	0.999979	1			Cs_ont_7g007140|Cs_ont_3g030070|Cs_ont_1g021470|Cs_ont_4g020010|Cs_ont_6g017900|Cs_ont_2g000750|Cs_ont_9g008110|Cs_ont_2g028480|Cs_ont_8g028160|Cs_ont_7g023260|Cs_ont_4g011410|Cs_ont_9g009470|Cs_ont_8g014900|Cs_ont_2g017540|Cs_ont_6g007050|Cs_ont_7g004040|Cs_ont_3g015260
3	map00970	Aminoacyl-tRNA biosynthesis	0.999999	1			Cs_ont_3g016280|Cs_ont_5g013790|Cs_ont_6g005290
10	map03008	Ribosome biogenesis in eukaryotes	0.999906	1			Cs_ont_4g006230|Cs_ont_2g001660|Cs_ont_2g029700|Cs_ont_8g009110|Cs_ont_1g023810|Cs_ont_5g006850|Cs_ont_3g013510|Cs_ont_5g022980|Cs_ont_6g004680|Cs_ont_1g014680
4	map03022	Basal transcription factors	0.999899	1		Transcription	Cs_ont_5g040240|Cs_ont_2g009150|Cs_ont_1g026450|Cs_ont_7g005480
5	map03020	RNA polymerase	0.999913	1			Cs_ont_9g025810|Cs_ont_6g018840|Cs_ont_3g019370|Cs_ont_7g024310|Cs_ont_1g010030
25	map03040	Spliceosome	1	1			Cs_ont_8g006740|Cs_ont_8g002910|Cs_ont_6g022210|Cs_ont_1g010810|Cs_ont_5g020290|Cs_ont_7g003890|Cs_ont_1g010380|Cs_ont_1g009700|Cs_ont_5g013330|Cs_ont_4g006230|Cs_ont_4g007320|Cs_ont_6g017900|Cs_ont_7g003830|Cs_ont_7g003840|Cs_ont_6g017960|Cs_ont_2g029700|Cs_ont_7g003880|Cs_ont_9g006500|Cs_ont_5g048270|Cs_ont_5g009990|Cs_ont_7g003860|Cs_ont_7g003960|Cs_ont_7g004040|Cs_ont_9g025780|Cs_ont_5g030400
1	map04122	Sulfur relay system	0.968638	1		Folding, sorting and degradation	Cs_ont_4g019480
19	map03018	RNA degradation	0.999968	1			Cs_ont_1g011550|Cs_ont_4g004930|Cs_ont_1g017780|Cs_ont_2g018800|Cs_ont_7g006210|Cs_ont_4g019360|Cs_ont_3g015010|Cs_ont_2g014880|Cs_ont_3g024430|Cs_ont_9g024260|Cs_ont_8g008390|Cs_ont_1g007430|Cs_ont_4g009550|Cs_ont_6g007050|Cs_ont_8g008850|Cs_ont_5g013330|Cs_ont_7g020410|Cs_ont_5g037680|Cs_ont_2g000110
28	map04120	Ubiquitin mediated proteolysis	0.984722	1			Cs_ont_7g024280|Cs_ont_6g012760|Cs_ont_6g009920|Cs_ont_5g031730|Cs_ont_6g022520|Cs_ont_4g017300|Cs_ont_5g035270|Cs_ont_6g020380|Cs_ont_4g008940|Cs_ont_2g034500|Cs_ont_9g003330|Cs_ont_6g004770|Cs_ont_2g001190|Cs_ont_6g012770|Cs_ont_5g004150|Cs_ont_7g014800|Cs_ont_4g017350|Cs_ont_8g002980|Cs_ont_5g003400|Cs_ont_7g000190|Cs_ont_7g005550|Cs_ont_3g008270|Cs_ont_6g020010|Cs_ont_2g031580|Cs_ont_7g015790…
6	map04130	SNARE interactions in vesicular transport	0.989547	1			Cs_ont_4g019220|Cs_ont_5g015510|Cs_ont_5g011660|Cs_ont_6g009560|Cs_ont_4g002220|Cs_ont_5g014410
2	map03050	Proteasome	0.999995	1			Cs_ont_4g022110|Cs_ont_2g010310
6	map03060	Protein export	0.997083	1			Cs_ont_5g002640|Cs_ont_3g004490|Cs_ont_1g008520|Cs_ont_8g002940|Cs_ont_3g015170|Cs_ont_3g019460
57	map04141	Protein processing in endoplasmic reticulum	0.996565	1			Cs_ont_8g002910|Cs_ont_6g016010|Cs_ont_8g002810|Cs_ont_9g026480|Cs_ont_9g001700|Cs_ont_6g012760|Cs_ont_1g010810|Cs_ont_7g003890|Cs_ont_7g005840|Cs_ont_3g032510|Cs_ont_1g010380|Cs_ont_4g025190|Cs_ont_8g005690|Cs_ont_3g027330|Cs_ont_5g045520|Cs_ont_6g012770|Cs_ont_2g007350|Cs_ont_2g034500|Cs_ont_9g028550|Cs_ont_4g023610|Cs_ont_7g003830|Cs_ont_1g008520|Cs_ont_9g023650|Cs_ont_6g024400|Cs_ont_4g014780…
7	map03250	Viral life cycle - HIV-1	0.738284	0.000129045		Information processing in viruses	Cs_ont_1g027770|Cs_ont_1g027780|Cs_ont_7g023260|Cs_ont_2g009070|Cs_ont_5g011140|Cs_ont_4g009690|Cs_ont_7g024670
24	map00360	Phenylalanine metabolism	0.00037459	0.000582198	Metabolism	Amino acid metabolism	Cs_ont_4g013970|Cs_ont_7g014810|Cs_ont_7g023970|Cs_ont_1g003410|Cs_ont_8g005310|Cs_ont_1g000160|Cs_ont_1g000140|Cs_ont_8g018720|Cs_ont_5g045250|Cs_ont_4g025310|Cs_ont_8g018730|Cs_ont_4g014270|Cs_ont_7g014820|Cs_ont_5g041500|Cs_ont_3g005820|Cs_ont_6g020620|Cs_ont_2g022750|Cs_ont_6g020600|Cs_ont_7g015990|Cs_ont_7g006400|Cs_ont_2g020700|Cs_ont_6g013390|Cs_ont_1g000110|Cs_ont_4g003990
29	map00350	Tyrosine metabolism	0.00022522	0.000746379			Cs_ont_4g013970|Cs_ont_7g014810|Cs_ont_5g027970|Cs_ont_7g023970|Cs_ont_3g033090|Cs_ont_1g003410|Cs_ont_5g013240|Cs_ont_1g000160|Cs_ont_1g000140|Cs_ont_7g017510|Cs_ont_5g045250|Cs_ont_3g007890|Cs_ont_4g025310|Cs_ont_3g007930|Cs_ont_3g033170|Cs_ont_7g014820|Cs_ont_5g041500|Cs_ont_3g001400|Cs_ont_3g005820|Cs_ont_7g017540|Cs_ont_2g022750|Cs_ont_4g013710|Cs_ont_7g015990|Cs_ont_3g011270|Cs_ont_2g020700…
23	map00400	Phenylalanine, tyrosine and tryptophan biosynthesis	0.00405162	0.00441692			Cs_ont_3g011210|Cs_ont_8g000880|Cs_ont_5g001740|Cs_ont_2g014170|Cs_ont_1g007050|Cs_ont_2g011440|Cs_ont_1g002190|Cs_ont_4g024260|Cs_ont_1g021460|Cs_ont_4g013970|Cs_ont_5g045700|Cs_ont_6g003480|Cs_ont_4g001530|Cs_ont_3g017540|Cs_ont_2g006920|Cs_ont_7g002300|Cs_ont_8g007110|Cs_ont_2g022750|Cs_ont_9g003710|Cs_ont_1g028510|Cs_ont_5g009120|Cs_ont_6g013390|Cs_ont_4g003990
37	map00380	Tryptophan metabolism	0.0285879	0.00467206			Cs_ont_9g016320|Cs_ont_8g018720|Cs_ont_5g046300|Cs_ont_3g033200|Cs_ont_2g034610|Cs_ont_1g002520|Cs_ont_2g018960|Cs_ont_5g016550|Cs_ont_9g010690|Cs_ont_1g003410|Cs_ont_2g015860|Cs_ont_1g000160|Cs_ont_1g000140|Cs_ont_3g001020|Cs_ont_5g045420|Cs_ont_7g015990|Cs_ont_2g032290|Cs_ont_7g024770|Cs_ont_5g016590|Cs_ont_8g018730|Cs_ont_4g007960|Cs_ont_8g028430|Cs_ont_4g003410|Cs_ont_1g015200|Cs_ont_2g016590…
24	map00330	Arginine and proline metabolism	0.0353437	0.00488652			Cs_ont_8g018720|Cs_ont_4g000010|Cs_ont_7g009950|Cs_ont_7g020290|Cs_ont_4g027420|Cs_ont_6g002050|Cs_ont_9g004060|Cs_ont_1g028810|Cs_ont_5g020090|Cs_ont_6g003380|Cs_ont_4g010640|Cs_ont_2g032290|Cs_ont_7g024770|Cs_ont_7g008250|Cs_ont_8g018730|Cs_ont_8g020080|Cs_ont_5g046100|Cs_ont_1g027440|Cs_ont_7g028320|Cs_ont_6g007010|Cs_ont_7g010020|Cs_ont_6g003410|Cs_ont_6g013390|Cs_ont_4g003990
23	map00260	Glycine, serine and threonine metabolism	0.112898	0.00494452			Cs_ont_4g005440|Cs_ont_5g002210|Cs_ont_2g025370|Cs_ont_7g023970|Cs_ont_4g005190|Cs_ont_2g009600|Cs_ont_7g023930|Cs_ont_6g007120|Cs_ont_4g000850|Cs_ont_7g011480|Cs_ont_3g010590|Cs_ont_5g045250|Cs_ont_6g013460|Cs_ont_6g003480|Cs_ont_1g009750|Cs_ont_8g029310|Cs_ont_2g031290|Cs_ont_2g006920|Cs_ont_5g041500|Cs_ont_3g005590|Cs_ont_9g014730|Cs_ont_3g012380|Cs_ont_8g025250
48	map00270	Cysteine and methionine metabolism	0.117647	0.00495477			Cs_ont_6g026110|Cs_ont_3g031500|Cs_ont_6g026130|Cs_ont_4g013970|Cs_ont_3g012880|Cs_ont_5g042040|Cs_ont_4g010400|Cs_ont_5g050270|Cs_ont_7g020290|Cs_ont_9g005610|Cs_ont_2g022750|Cs_ont_4g027420|Cs_ont_8g027100|Cs_ont_5g006290|Cs_ont_7g019350|Cs_ont_9g004060|Cs_ont_3g009580|Cs_ont_5g048560|Cs_ont_3g021860|Cs_ont_1g021320|Cs_ont_4g020390|Cs_ont_6g003380|Cs_ont_1g023010|Cs_ont_5g003370|Cs_ont_3g032860…
20	map00280	Valine, leucine and isoleucine degradation	0.146766	0.00959226			Cs_ont_5g042830|Cs_ont_5g046100|Cs_ont_2g032290|Cs_ont_2g016590|Cs_ont_6g013460|Cs_ont_5g042390|Cs_ont_7g014880|Cs_ont_8g027150|Cs_ont_3g027290|Cs_ont_1g023010|Cs_ont_3g027280|Cs_ont_5g040710|Cs_ont_3g012880|Cs_ont_5g013300|Cs_ont_3g012870|Cs_ont_9g003840|Cs_ont_7g024770|Cs_ont_1g027440|Cs_ont_1g005560|Cs_ont_8g027100
17	map00250	Alanine, aspartate and glutamate metabolism	0.272076	0.0100791			Cs_ont_9g027600|Cs_ont_6g005260|Cs_ont_7g023930|Cs_ont_5g043230|Cs_ont_6g013460|Cs_ont_3g011990|Cs_ont_8g000470|Cs_ont_9g004320|Cs_ont_1g015820|Cs_ont_2g014610|Cs_ont_9g028390|Cs_ont_2g031290|Cs_ont_6g013390|Cs_ont_8g019860|Cs_ont_5g029050|Cs_ont_8g019910|Cs_ont_4g003990
10	map00310	Lysine degradation	0.438696	0.0100849			Cs_ont_4g022770|Cs_ont_4g000850|Cs_ont_4g022790|Cs_ont_2g032290|Cs_ont_2g016590|Cs_ont_5g046100|Cs_ont_2g018960|Cs_ont_5g030990|Cs_ont_7g024770|Cs_ont_1g027440
7	map00290	Valine, leucine and isoleucine biosynthesis	0.5304	0.0102175			Cs_ont_2g010740|Cs_ont_6g007120|Cs_ont_8g027150|Cs_ont_1g023010|Cs_ont_3g012880|Cs_ont_3g012870|Cs_ont_8g027100
2	map00300	Lysine biosynthesis	0.797999	0.0134814			Cs_ont_2g025370|Cs_ont_3g025120
4	map00340	Histidine metabolism	0.71359	0.0165579			Cs_ont_5g046100|Cs_ont_2g032290|Cs_ont_7g024770|Cs_ont_1g027440
7	map00220	Arginine biosynthesis	0.738284	0.0174266			Cs_ont_6g005260|Cs_ont_7g023930|Cs_ont_5g043230|Cs_ont_3g011990|Cs_ont_9g004320|Cs_ont_6g013390|Cs_ont_4g003990
38	map00999	Biosynthesis of various plant secondary metabolites	2.26e-05	0.0266694		Biosynthesis of other secondary metabolites	Cs_ont_2g014520|Cs_ont_3g032920|Cs_ont_8g027180|Cs_ont_5g025610|Cs_ont_2g030250|Cs_ont_4g016470|Cs_ont_3g004390|Cs_ont_5g006290|Cs_ont_8g010150|Cs_ont_7g021630|Cs_ont_4g014420|Cs_ont_7g029050|Cs_ont_2g035040|Cs_ont_4g012710|Cs_ont_7g029070|Cs_ont_5g009120|Cs_ont_3g021920|Cs_ont_5g008300|Cs_ont_8g025030|Cs_ont_3g021890|Cs_ont_9g027760|Cs_ont_5g014690|Cs_ont_6g025650|Cs_ont_7g010080|Cs_ont_7g029090…
82	map00940	Phenylpropanoid biosynthesis	0.00024776	0.0267407			Cs_ont_8g011010|Cs_ont_2g034230|Cs_ont_7g004590|Cs_ont_2g034310|Cs_ont_5g017050|Cs_ont_2g008300|Cs_ont_5g044160|Cs_ont_6g025170|Cs_ont_6g002270|Cs_ont_9g022440|Cs_ont_6g020620|Cs_ont_7g020330|Cs_ont_2g029140|Cs_ont_9g022460|Cs_ont_2g034610|Cs_ont_3g007960|Cs_ont_1g002520|Cs_ont_9g003780|Cs_ont_6g005610|Cs_ont_5g016550|Cs_ont_4g026210|Cs_ont_2g011280|Cs_ont_1g025380|Cs_ont_2g034290|Cs_ont_8g005310…
22	map00960	Tropane, piperidine and pyridine alkaloid biosynthesis	0.00383878	0.0376611			Cs_ont_6g016780|Cs_ont_4g013970|Cs_ont_9g012610|Cs_ont_6g016760|Cs_ont_8g001890|Cs_ont_7g023970|Cs_ont_2g025700|Cs_ont_8g001870|Cs_ont_8g001910|Cs_ont_8g001850|Cs_ont_5g045250|Cs_ont_3g009610|Cs_ont_6g016790|Cs_ont_8g001880|Cs_ont_8g017240|Cs_ont_5g041500|Cs_ont_3g008580|Cs_ont_6g016860|Cs_ont_8g001860|Cs_ont_2g022750|Cs_ont_6g013390|Cs_ont_4g003990
14	map00950	Isoquinoline alkaloid biosynthesis	0.0162417	0.0434314			Cs_ont_1g003410|Cs_ont_1g000110|Cs_ont_4g013970|Cs_ont_6g013390|Cs_ont_1g000160|Cs_ont_2g022750|Cs_ont_1g000140|Cs_ont_7g015990|Cs_ont_2g020700|Cs_ont_3g005820|Cs_ont_5g045250|Cs_ont_7g023970|Cs_ont_5g041500|Cs_ont_4g003990
7	map00901	Indole alkaloid biosynthesis	0.0217654	0.0532193			Cs_ont_1g003410|Cs_ont_3g005820|Cs_ont_1g000160|Cs_ont_1g000140|Cs_ont_7g015990|Cs_ont_2g020700|Cs_ont_1g000110
8	map00965	Betalain biosynthesis	0.0272285	0.0543561			Cs_ont_1g003410|Cs_ont_1g021220|Cs_ont_3g005820|Cs_ont_1g000160|Cs_ont_1g000140|Cs_ont_7g015990|Cs_ont_2g020700|Cs_ont_1g000110
5	map00944	Flavone and flavonol biosynthesis	0.0660222	0.0794039			Cs_ont_8g007220|Cs_ont_5g038970|Cs_ont_9g014840|Cs_ont_2g030550|Cs_ont_8g010070
8	map00966	Glucosinolate biosynthesis	0.112457	0.0906704			Cs_ont_1g001210|Cs_ont_5g046300|Cs_ont_8g027150|Cs_ont_1g023010|Cs_ont_3g012880|Cs_ont_7g003070|Cs_ont_3g012870|Cs_ont_8g027100
29	map00941	Flavonoid biosynthesis	0.157649	0.0990699			Cs_ont_8g011010|Cs_ont_5g038970|Cs_ont_5g040910|Cs_ont_5g017050|Cs_ont_3g003380|Cs_ont_6g025170|Cs_ont_8g017240|Cs_ont_9g012610|Cs_ont_3g009610|Cs_ont_1g006760|Cs_ont_7g004690|Cs_ont_6g005610|Cs_ont_2g025700|Cs_ont_1g020980|Cs_ont_5g024890|Cs_ont_8g010070|Cs_ont_8g007220|Cs_ont_4g024900|Cs_ont_5g024640|Cs_ont_2g030550|Cs_ont_1g024770|Cs_ont_7g019870|Cs_ont_6g019320|Cs_ont_3g008580|Cs_ont_1g014200…
2	map00942	Anthocyanin biosynthesis	0.179186	0.119805			Cs_ont_5g016710|Cs_ont_4g026590
4	map00943	Isoflavonoid biosynthesis	0.204725	0.121729			Cs_ont_1g024230|Cs_ont_1g024260|Cs_ont_1g024240|Cs_ont_5g024890
1	map00254	Aflatoxin biosynthesis	0.269897	0.128688			Cs_ont_3g010480
2	map00232	Caffeine metabolism	0.295685	0.138391			Cs_ont_7g001110|Cs_ont_7g009610
1	map00996	Biosynthesis of various alkaloids	0.715916	0.141375			Cs_ont_1g002510
1	map00524	Neomycin, kanamycin and gentamicin biosynthesis	0.792618	0.144516			Cs_ont_2g031610
12	map00945	Stilbenoid, diarylheptanoid and gingerol biosynthesis	0.906624	0.145292			Cs_ont_8g011010|Cs_ont_4g024900|Cs_ont_5g017050|Cs_ont_5g024640|Cs_ont_1g014200|Cs_ont_6g025170|Cs_ont_8g024920|Cs_ont_1g006760|Cs_ont_1g024770|Cs_ont_5g015730|Cs_ont_6g019320|Cs_ont_6g005610
2	map00261	Monobactam biosynthesis	0.680589	0.145658			Cs_ont_2g025370|Cs_ont_3g002500
64	map00500	Starch and sucrose metabolism	0.00026769	0.147605		Carbohydrate metabolism	Cs_ont_9g023740|Cs_ont_2g002600|Cs_ont_5g018050|Cs_ont_4g022570|Cs_ont_7g021630|Cs_ont_8g027180|Cs_ont_2g010790|Cs_ont_2g031610|Cs_ont_1g020160|Cs_ont_9g024860|Cs_ont_5g050540|Cs_ont_4g016470|Cs_ont_9g023840|Cs_ont_3g001530|Cs_ont_5g008300|Cs_ont_8g010150|Cs_ont_8g020210|Cs_ont_9g014140|Cs_ont_9g010650|Cs_ont_7g029050|Cs_ont_5g005850|Cs_ont_1g020030|Cs_ont_3g010740|Cs_ont_3g030880|Cs_ont_4g012710…
50	map00010	Glycolysis / Gluconeogenesis	0.00225789	0.217753			Cs_ont_3g007440|Cs_ont_1g022750|Cs_ont_5g011100|Cs_ont_8g018970|Cs_ont_2g031610|Cs_ont_5g042040|Cs_ont_9g026960|Cs_ont_9g024260|Cs_ont_5g027970|Cs_ont_2g035650|Cs_ont_6g007180|Cs_ont_6g016620|Cs_ont_1g017780|Cs_ont_6g007450|Cs_ont_7g011580|Cs_ont_2g026020|Cs_ont_1g026880|Cs_ont_6g014400|Cs_ont_6g016590|Cs_ont_7g017510|Cs_ont_9g028070|Cs_ont_2g032290|Cs_ont_5g015220|Cs_ont_3g007890|Cs_ont_2g000110…
26	map00052	Galactose metabolism	0.00967624	0.217873			Cs_ont_9g023740|Cs_ont_2g028550|Cs_ont_9g000760|Cs_ont_2g031610|Cs_ont_1g020160|Cs_ont_6g005530|Cs_ont_5g006730|Cs_ont_3g029500|Cs_ont_1g017780|Cs_ont_4g023960|Cs_ont_1g020030|Cs_ont_1g019970|Cs_ont_6g006770|Cs_ont_2g000110|Cs_ont_1g020150|Cs_ont_5g041770|Cs_ont_9g020870|Cs_ont_4g009550|Cs_ont_5g027820|Cs_ont_4g004930|Cs_ont_5g040350|Cs_ont_5g047420|Cs_ont_3g013880|Cs_ont_6g001510|Cs_ont_4g005640…
24	map00053	Ascorbate and aldarate metabolism	0.0192331	0.262732			Cs_ont_6g005160|Cs_ont_4g027270|Cs_ont_2g030090|Cs_ont_7g027340|Cs_ont_9g024110|Cs_ont_8g004040|Cs_ont_6g016620|Cs_ont_3g011290|Cs_ont_1g017870|Cs_ont_1g027440|Cs_ont_6g016590|Cs_ont_6g000390|Cs_ont_2g032290|Cs_ont_7g024770|Cs_ont_8g012170|Cs_ont_4g004130|Cs_ont_1g028480|Cs_ont_5g001750|Cs_ont_6g019300|Cs_ont_5g046100|Cs_ont_9g014770|Cs_ont_2g028070|Cs_ont_6g005080|Cs_ont_7g004500
39	map00620	Pyruvate metabolism	0.0356462	0.264189			Cs_ont_5g011100|Cs_ont_1g022750|Cs_ont_2g026560|Cs_ont_5g042040|Cs_ont_9g026960|Cs_ont_2g003950|Cs_ont_5g027970|Cs_ont_2g035650|Cs_ont_6g007180|Cs_ont_6g016620|Cs_ont_Un000210|Cs_ont_2g001750|Cs_ont_5g044230|Cs_ont_7g011580|Cs_ont_2g026020|Cs_ont_6g016590|Cs_ont_7g017510|Cs_ont_2g032290|Cs_ont_7g024770|Cs_ont_8g026850|Cs_ont_3g007890|Cs_ont_6g006810|Cs_ont_3g010480|Cs_ont_9g001730|Cs_ont_4g004260…
29	map00562	Inositol phosphate metabolism	0.0676355	0.264459			Cs_ont_1g005550|Cs_ont_8g018970|Cs_ont_1g020890|Cs_ont_6g000560|Cs_ont_1g000790|Cs_ont_8g026860|Cs_ont_8g027930|Cs_ont_2g030700|Cs_ont_1g024450|Cs_ont_1g005380|Cs_ont_1g017870|Cs_ont_7g017040|Cs_ont_2g009410|Cs_ont_3g003310|Cs_ont_8g012170|Cs_ont_1g005350|Cs_ont_1g005420|Cs_ont_1g000780|Cs_ont_8g000640|Cs_ont_9g020220|Cs_ont_7g001470|Cs_ont_7g017890|Cs_ont_8g000630|Cs_ont_7g017050|Cs_ont_3g024850…
45	map00520	Amino sugar and nucleotide sugar metabolism	0.143748	0.26494			Cs_ont_2g031610|Cs_ont_5g018050|Cs_ont_1g029150|Cs_ont_4g027270|Cs_ont_7g016120|Cs_ont_6g002930|Cs_ont_5g013940|Cs_ont_9g023620|Cs_ont_5g019520|Cs_ont_7g027340|Cs_ont_9g024110|Cs_ont_3g029500|Cs_ont_2g000180|Cs_ont_7g012620|Cs_ont_5g019480|Cs_ont_7g015520|Cs_ont_1g027740|Cs_ont_8g028710|Cs_ont_4g005590|Cs_ont_5g007630|Cs_ont_5g034050|Cs_ont_5g005850|Cs_ont_6g006490|Cs_ont_6g000390|Cs_ont_5g021010…
9	map00650	Butanoate metabolism	0.210871	0.284452			Cs_ont_2g010740|Cs_ont_2g016590|Cs_ont_9g001730|Cs_ont_2g014610|Cs_ont_9g028390|Cs_ont_5g040710|Cs_ont_4g014270|Cs_ont_9g001740|Cs_ont_5g029050
17	map00030	Pentose phosphate pathway 戊糖磷酸途径	0.424265	0.285816			Cs_ont_2g008890|Cs_ont_3g007440|Cs_ont_2g012460|Cs_ont_4g028220|Cs_ont_6g007450|Cs_ont_5g001720|Cs_ont_4g001640|Cs_ont_7g021120|Cs_ont_3g019070|Cs_ont_2g000110|Cs_ont_2g018470|Cs_ont_3g009940|Cs_ont_4g009550|Cs_ont_4g004930|Cs_ont_1g017780|Cs_ont_7g011620|Cs_ont_6g025360
17	map00051	Fructose and mannose metabolism	0.455695	0.298052			Cs_ont_3g007440|Cs_ont_2g031610|Cs_ont_5g018050|Cs_ont_2g000110|Cs_ont_5g018060|Cs_ont_3g003360|Cs_ont_9g025030|Cs_ont_9g024860|Cs_ont_5g041010|Cs_ont_8g018970|Cs_ont_2g018470|Cs_ont_6g004070|Cs_ont_4g009550|Cs_ont_4g004930|Cs_ont_1g017780|Cs_ont_1g027740|Cs_ont_6g007450
22	map00630	Glyoxylate and dicarboxylate metabolism	0.52861	0.302944			Cs_ont_7g011480|Cs_ont_2g031290|Cs_ont_4g005440|Cs_ont_5g002210|Cs_ont_6g025150|Cs_ont_2g003950|Cs_ont_4g005190|Cs_ont_2g009600|Cs_ont_2g019460|Cs_ont_5g044230|Cs_ont_7g023930|Cs_ont_3g001020|Cs_ont_6g005260|Cs_ont_2g026020|Cs_ont_9g001730|Cs_ont_2g016590|Cs_ont_4g025920|Cs_ont_5g044220|Cs_ont_9g014730|Cs_ont_9g004320|Cs_ont_3g012380|Cs_ont_9g001740
1	map00660	C5-Branched dibasic acid metabolism	0.95703	0.304497			Cs_ont_2g010740
26	map00040	Pentose and glucuronate interconversions	0.9255	0.325048			Cs_ont_9g025030|Cs_ont_4g002520|Cs_ont_2g006890|Cs_ont_5g007910|Cs_ont_7g027340|Cs_ont_6g016620|Cs_ont_3g022830|Cs_ont_9g011940|Cs_ont_4g020590|Cs_ont_6g000820|Cs_ont_6g021660|Cs_ont_9g023820|Cs_ont_7g013970|Cs_ont_6g016590|Cs_ont_6g000390|Cs_ont_1g018180|Cs_ont_6g006770|Cs_ont_3g014930|Cs_ont_7g023220|Cs_ont_4g009340|Cs_ont_5g044630|Cs_ont_3g014850|Cs_ont_4g022760|Cs_ont_4g022700|Cs_ont_2g028070…
12	map00640	Propanoate metabolism	0.675027	0.338257			Cs_ont_1g000600|Cs_ont_7g018840|Cs_ont_6g006810|Cs_ont_5g042390|Cs_ont_3g010480|Cs_ont_2g026020|Cs_ont_5g042040|Cs_ont_2g027280|Cs_ont_Un000210|Cs_ont_7g014880|Cs_ont_5g042580|Cs_ont_1g005560
9	map00020	Citrate cycle (TCA cycle)	0.931506	0.338834			Cs_ont_1g022750|Cs_ont_6g025500|Cs_ont_7g018840|Cs_ont_3g012580|Cs_ont_2g003950|Cs_ont_2g018960|Cs_ont_7g024220|Cs_ont_1g000500|Cs_ont_9g001380
32	map00195	Photosynthesis	1.32e-05	0.339879		Energy metabolism	Cs_ont_7g023170|Cs_ont_5g013020|Cs_ont_7g009270|Cs_ont_4g021730|Cs_ont_3g001630|Cs_ont_5g012750|Cs_ont_6g006790|Cs_ont_2g006520|Cs_ont_1g005130|Cs_ont_7g004290|Cs_ont_5g011340|Cs_ont_2g008000|Cs_ont_2g020690|Cs_ont_7g014330|Cs_ont_4g016840|Cs_ont_2g021750|Cs_ont_3g009300|Cs_ont_9g005310|Cs_ont_5g010360|Cs_ont_2g009440|Cs_ont_3g027870|Cs_ont_7g011280|Cs_ont_4g002280|Cs_ont_2g015450|Cs_ont_1g028230…
13	map00910	Nitrogen metabolism	0.0391377	0.349749			Cs_ont_3g009960|Cs_ont_8g024650|Cs_ont_8g005360|Cs_ont_6g005260|Cs_ont_5g045940|Cs_ont_7g024560|Cs_ont_9g004320|Cs_ont_5g043230|Cs_ont_7g024130|Cs_ont_9g027600|Cs_ont_2g028590|Cs_ont_2g029120|Cs_ont_8g005350
12	map00920	Sulfur metabolism	0.128049	0.349749			Cs_ont_5g003370|Cs_ont_5g014870|Cs_ont_1g005550|Cs_ont_2g006100|Cs_ont_3g018370|Cs_ont_4g020390|Cs_ont_5g021090|Cs_ont_5g033500|Cs_ont_3g002500|Cs_ont_9g005610|Cs_ont_4g019130|Cs_ont_4g015190
30	map00190	Oxidative phosphorylation	0.999359	0.358786			Cs_ont_Un004560|Cs_ont_6g001870|Cs_ont_Un000270|Cs_ont_4g025810|Cs_ont_6g006790|Cs_ont_1g020480|Cs_ont_4g000650|Cs_ont_1g000500|Cs_ont_5g016530|Cs_ont_Un000460|Cs_ont_6g024600|Cs_ont_2g005780|Cs_ont_Un003330|Cs_ont_Un000170|Cs_ont_8g028220|Cs_ont_4g002280|Cs_ont_3g013190|Cs_ont_2g001850|Cs_ont_6g006780|Cs_ont_5g011190|Cs_ont_Un005300|Cs_ont_2g000450|Cs_ont_5g005530|Cs_ont_6g018080|Cs_ont_6g020250…
15	map00196	Photosynthesis - antenna proteins	9.78e-07	0.396027			Cs_ont_2g002610|Cs_ont_2g002580|Cs_ont_2g002590|Cs_ont_4g022220|Cs_ont_7g001360|Cs_ont_7g022160|Cs_ont_2g017340|Cs_ont_7g005590|Cs_ont_5g039940|Cs_ont_6g014990|Cs_ont_5g024910|Cs_ont_2g002640|Cs_ont_8g014690|Cs_ont_4g015540|Cs_ont_3g028560
17	map00710	Carbon fixation in photosynthetic organisms	0.818392	0.399405			Cs_ont_2g008890|Cs_ont_3g007440|Cs_ont_1g022750|Cs_ont_3g012580|Cs_ont_6g007450|Cs_ont_7g023930|Cs_ont_2g026560|Cs_ont_3g000770|Cs_ont_3g019070|Cs_ont_2g012460|Cs_ont_8g018970|Cs_ont_6g013390|Cs_ont_5g001720|Cs_ont_2g003950|Cs_ont_9g028070|Cs_ont_4g003990|Cs_ont_4g025920
9	map00511	Other glycan degradation	0.0855869	0.400891		Glycan biosynthesis and metabolism	Cs_ont_1g028350|Cs_ont_7g002010|Cs_ont_2g010780|Cs_ont_5g021010|Cs_ont_9g012970|Cs_ont_1g019970|Cs_ont_7g013360|Cs_ont_3g031000|Cs_ont_7g002030
4	map00601	Glycosphingolipid biosynthesis lacto and neolacto series	0.143079	0.435866			Cs_ont_6g015220|Cs_ont_6g015200|Cs_ont_6g015170|Cs_ont_6g015190
3	map00604	Glycosphingolipid biosynthesis - ganglio series	0.285874	0.441826			Cs_ont_5g021010|Cs_ont_1g019970|Cs_ont_2g010780
7	map00603	Glycosphingolipid biosynthesis - globo and isoglobo series	0.380584	0.5445			Cs_ont_6g015190|Cs_ont_2g010780|Cs_ont_6g015170|Cs_ont_6g015220|Cs_ont_6g015200|Cs_ont_5g021010|Cs_ont_5g027820
5	map00531	Glycosaminoglycan degradation	0.442082	0.552523			Cs_ont_8g014930|Cs_ont_5g021010|Cs_ont_5g046400|Cs_ont_1g019970|Cs_ont_2g010780
1	map00543	Exopolysaccharide biosynthesis	0.466967	0.554932			Cs_ont_4g020390
1	map00563	Glycosylphosphatidylinositol (GPI)-anchor biosynthesis	0.999892	0.556662			Cs_ont_8g011130
3	map00513	Various types of N-glycan biosynthesis	0.998805	0.565658			Cs_ont_5g021010|Cs_ont_2g010780|Cs_ont_2g016770
3	map00510	N-Glycan biosynthesis	0.999685	0.598087			Cs_ont_8g005720|Cs_ont_4g005760|Cs_ont_2g016770
12	map00591	Linoleic acid metabolism	0.00101736	0.697738		Lipid metabolism	Cs_ont_2g033700|Cs_ont_2g033680|Cs_ont_3g016040|Cs_ont_2g033720|Cs_ont_2g033730|Cs_ont_2g033670|Cs_ont_5g024960|Cs_ont_2g033660|Cs_ont_2g033760|Cs_ont_9g005300|Cs_ont_7g022650|Cs_ont_1g019170
26	map00071	Fatty acid degradation	0.00099263	0.697738			Cs_ont_4g008350|Cs_ont_5g013300|Cs_ont_5g027970|Cs_ont_9g003840|Cs_ont_4g006050|Cs_ont_9g007680|Cs_ont_8g000970|Cs_ont_7g017510|Cs_ont_2g032290|Cs_ont_7g024770|Cs_ont_3g007890|Cs_ont_3g011270|Cs_ont_3g007930|Cs_ont_2g016590|Cs_ont_5g046100|Cs_ont_5g013240|Cs_ont_1g027440|Cs_ont_3g001400|Cs_ont_1g000600|Cs_ont_7g017540|Cs_ont_5g042580|Cs_ont_2g027280|Cs_ont_8g022970|Cs_ont_3g016120|Cs_ont_7g017500…
15	map01040	Biosynthesis of unsaturated fatty acids	0.00092886	0.699109			Cs_ont_1g000600|Cs_ont_7g016560|Cs_ont_5g020110|Cs_ont_8g003380|Cs_ont_3g013820|Cs_ont_7g023130|Cs_ont_3g007870|Cs_ont_2g027280|Cs_ont_7g003610|Cs_ont_2g034070|Cs_ont_5g013300|Cs_ont_3g013810|Cs_ont_5g042580|Cs_ont_7g023140|Cs_ont_9g003840
29	map00592	alpha-Linolenic acid metabolism	0.0016341	0.710554			Cs_ont_7g019800|Cs_ont_2g033720|Cs_ont_2g033700|Cs_ont_5g026980|Cs_ont_2g033660|Cs_ont_2g033760|Cs_ont_4g008350|Cs_ont_5g042580|Cs_ont_9g003840|Cs_ont_2g033680|Cs_ont_5g014090|Cs_ont_2g029680|Cs_ont_1g019170|Cs_ont_7g022650|Cs_ont_3g030250|Cs_ont_3g007890|Cs_ont_3g001310|Cs_ont_2g033730|Cs_ont_3g007930|Cs_ont_2g033670|Cs_ont_5g013300|Cs_ont_5g013240|Cs_ont_1g000600|Cs_ont_5g024960|Cs_ont_2g027280…
31	map00564	Glycerophospholipid metabolism	0.0405083	0.712797			Cs_ont_7g015480|Cs_ont_7g006810|Cs_ont_1g020320|Cs_ont_5g040750|Cs_ont_6g015280|Cs_ont_2g030700|Cs_ont_5g003280|Cs_ont_8g022460|Cs_ont_4g026810|Cs_ont_7g017040|Cs_ont_4g015750|Cs_ont_3g004960|Cs_ont_3g006820|Cs_ont_9g018730|Cs_ont_7g027980|Cs_ont_7g000780|Cs_ont_6g012320|Cs_ont_4g012320|Cs_ont_5g024960|Cs_ont_4g018550|Cs_ont_5g044970|Cs_ont_3g001620|Cs_ont_9g020220|Cs_ont_7g027440|Cs_ont_6g022750…
14	map00073	Cutin, suberine and wax biosynthesis	0.0397249	0.727311			Cs_ont_4g006050|Cs_ont_8g000970|Cs_ont_2g007000|Cs_ont_2g017180|Cs_ont_7g018670|Cs_ont_8g007560|Cs_ont_7g008330|Cs_ont_8g007580|Cs_ont_6g018590|Cs_ont_5g000210|Cs_ont_9g009470|Cs_ont_5g003290|Cs_ont_5g048150|Cs_ont_5g003300
28	map00561	Glycerolipid metabolism	0.0920659	0.738668			Cs_ont_6g015280|Cs_ont_5g046100|Cs_ont_5g003280|Cs_ont_8g022460|Cs_ont_6g016620|Cs_ont_4g026810|Cs_ont_4g005590|Cs_ont_2g008060|Cs_ont_4g015750|Cs_ont_3g004960|Cs_ont_4g024200|Cs_ont_6g016590|Cs_ont_7g000780|Cs_ont_7g024770|Cs_ont_4g018550|Cs_ont_8g006710|Cs_ont_4g026040|Cs_ont_1g027440|Cs_ont_1g013080|Cs_ont_5g027820|Cs_ont_2g032290|Cs_ont_6g015360|Cs_ont_4g004620|Cs_ont_2g008050|Cs_ont_7g015380…
13	map00062	Fatty acid elongation	0.101768	0.742409			Cs_ont_9g006710|Cs_ont_7g019370|Cs_ont_8g003530|Cs_ont_5g005190|Cs_ont_3g015670|Cs_ont_4g003060|Cs_ont_7g023130|Cs_ont_7g003610|Cs_ont_8g003380|Cs_ont_7g004640|Cs_ont_9g006670|Cs_ont_4g006740|Cs_ont_7g023140
4	map00590	Arachidonic acid metabolism	0.27225	0.751896			Cs_ont_7g004950|Cs_ont_1g001580|Cs_ont_5g021100|Cs_ont_5g024960
7	map00565	Ether lipid metabolism	0.380584	0.760984			Cs_ont_7g017040|Cs_ont_1g020320|Cs_ont_5g040750|Cs_ont_7g017050|Cs_ont_5g024960|Cs_ont_3g001620|Cs_ont_2g030700
18	map00061	Fatty acid biosynthesis	0.404998	0.843527			Cs_ont_1g018550|Cs_ont_1g018560|Cs_ont_5g020110|Cs_ont_1g018570|Cs_ont_2g033990|Cs_ont_6g006810|Cs_ont_7g012660|Cs_ont_3g010480|Cs_ont_3g013820|Cs_ont_8g015910|Cs_ont_3g007870|Cs_ont_7g016560|Cs_ont_5g006610|Cs_ont_3g013810|Cs_ont_3g016120|Cs_ont_Un006130|Cs_ont_Un000210|Cs_ont_8g022970
10	map00600	Sphingolipid metabolism	0.66991	0.850933			Cs_ont_9g012970|Cs_ont_7g026380|Cs_ont_2g010780|Cs_ont_5g021010|Cs_ont_1g021300|Cs_ont_3g031000|Cs_ont_1g019970|Cs_ont_7g023210|Cs_ont_6g015760|Cs_ont_5g027820
6	map00100	Steroid biosynthesis	0.976623	0.851065			Cs_ont_3g012970|Cs_ont_8g014040|Cs_ont_8g014080|Cs_ont_4g024700|Cs_ont_5g035620|Cs_ont_8g020530
26	map00860	Porphyrin metabolism	0.00033317	1		Metabolism of cofactors and vitamins	Cs_ont_5g010790|Cs_ont_5g040040|Cs_ont_9g006220|Cs_ont_6g006550|Cs_ont_3g009180|Cs_ont_9g020430|Cs_ont_3g012550|Cs_ont_2g031330|Cs_ont_2g031540|Cs_ont_7g029030|Cs_ont_4g005230|Cs_ont_2g004040|Cs_ont_3g008370|Cs_ont_5g006020|Cs_ont_1g025010|Cs_ont_7g018790|Cs_ont_7g013370|Cs_ont_1g020990|Cs_ont_9g010700|Cs_ont_5g028150|Cs_ont_9g003560|Cs_ont_5g040850|Cs_ont_7g012840|Cs_ont_7g002680|Cs_ont_7g010180…
27	map00130	Ubiquinone and other terpenoid-quinone biosynthesis	0.00599154	1			Cs_ont_5g044160|Cs_ont_4g025830|Cs_ont_7g014810|Cs_ont_5g047300|Cs_ont_1g026250|Cs_ont_4g026210|Cs_ont_7g024170|Cs_ont_7g015010|Cs_ont_2g006360|Cs_ont_4g019120|Cs_ont_1g006760|Cs_ont_2g008040|Cs_ont_8g005840|Cs_ont_4g013970|Cs_ont_5g016610|Cs_ont_2g024940|Cs_ont_4g024900|Cs_ont_7g014820|Cs_ont_6g025120|Cs_ont_8g015890|Cs_ont_7g024370|Cs_ont_7g020440|Cs_ont_1g009820|Cs_ont_4g001800|Cs_ont_5g044180…
13	map00730	Thiamine metabolism	0.0102947	1			Cs_ont_1g022340|Cs_ont_9g003790|Cs_ont_5g044090|Cs_ont_5g012730|Cs_ont_2g006830|Cs_ont_4g017410|Cs_ont_9g001600|Cs_ont_7g004930|Cs_ont_5g012740|Cs_ont_2g023830|Cs_ont_5g027420|Cs_ont_4g028450|Cs_ont_7g022610
8	map00740	Riboflavin metabolism	0.181548	1			Cs_ont_6g023840|Cs_ont_8g016100|Cs_ont_5g047960|Cs_ont_3g030880|Cs_ont_2g014200|Cs_ont_5g003070|Cs_ont_2g014210|Cs_ont_7g019130
14	map00770	Pantothenate and CoA biosynthesis	0.317167	1			Cs_ont_2g010740|Cs_ont_9g017330|Cs_ont_6g007010|Cs_ont_8g027150|Cs_ont_3g030880|Cs_ont_1g023010|Cs_ont_3g012880|Cs_ont_5g044460|Cs_ont_5g046100|Cs_ont_3g012870|Cs_ont_2g032290|Cs_ont_7g024770|Cs_ont_1g027440|Cs_ont_8g027100
3	map00750	Vitamin B6 metabolism	0.900948	1			Cs_ont_6g014790|Cs_ont_8g004740|Cs_ont_1g020460
4	map00670	One carbon pool by folate	0.858737	1			Cs_ont_9g014730|Cs_ont_3g012380|Cs_ont_4g005190|Cs_ont_5g023110
5	map00760	Nicotinate and nicotinamide metabolism	0.869699	1			Cs_ont_2g016620|Cs_ont_3g030880|Cs_ont_5g049910|Cs_ont_5g005930|Cs_ont_5g022490
7	map00790	Folate biosynthesis	0.738284	1			Cs_ont_2g002740|Cs_ont_4g013960|Cs_ont_8g016100|Cs_ont_4g004050|Cs_ont_5g021100|Cs_ont_5g034510|Cs_ont_3g000280
7	map00780	Biotin metabolism	0.738284	1			Cs_ont_1g018550|Cs_ont_5g017320|Cs_ont_1g018560|Cs_ont_8g015910|Cs_ont_1g018570|Cs_ont_2g033990|Cs_ont_4g026530
1	map00785	Lipoic acid metabolism	0.715916	1			Cs_ont_3g004300
52	map00480	Glutathione metabolism	0.00723856	1		Metabolism of other amino acids	Cs_ont_3g001590|Cs_ont_9g008260|Cs_ont_6g005160|Cs_ont_1g003730|Cs_ont_8g001570|Cs_ont_4g000010|Cs_ont_5g013000|Cs_ont_7g014640|Cs_ont_7g025620|Cs_ont_3g022180|Cs_ont_9g010850|Cs_ont_8g004040|Cs_ont_9g010790|Cs_ont_9g008300|Cs_ont_6g018880|Cs_ont_3g011290|Cs_ont_5g047630|Cs_ont_9g010810|Cs_ont_7g025640|Cs_ont_8g001600|Cs_ont_5g029590|Cs_ont_5g020090|Cs_ont_9g010830|Cs_ont_9g010770|Cs_ont_7g008250…
19	map00410	beta-Alanine metabolism	0.0311971	1			Cs_ont_1g000600|Cs_ont_5g046100|Cs_ont_2g032290|Cs_ont_2g014610|Cs_ont_7g024770|Cs_ont_5g042390|Cs_ont_6g007010|Cs_ont_7g014880|Cs_ont_2g027280|Cs_ont_7g010020|Cs_ont_5g029050|Cs_ont_7g009950|Cs_ont_4g010640|Cs_ont_7g028320|Cs_ont_5g045250|Cs_ont_5g042580|Cs_ont_7g023970|Cs_ont_5g041500|Cs_ont_1g027440
22	map00460	Cyanoamino acid metabolism	0.0881531	1			Cs_ont_7g021630|Cs_ont_8g027180|Cs_ont_1g009760|Cs_ont_4g016470|Cs_ont_4g005190|Cs_ont_1g001210|Cs_ont_5g008300|Cs_ont_8g010150|Cs_ont_7g029050|Cs_ont_4g012710|Cs_ont_7g029070|Cs_ont_5g003370|Cs_ont_8g011060|Cs_ont_5g014690|Cs_ont_7g003070|Cs_ont_1g001580|Cs_ont_7g010080|Cs_ont_7g029090|Cs_ont_8g010140|Cs_ont_9g014730|Cs_ont_3g012380|Cs_ont_8g027240
5	map00430	Taurine and hypotaurine metabolism	0.103437	1			Cs_ont_1g001580|Cs_ont_4g022440|Cs_ont_2g014610|Cs_ont_5g029050|Cs_ont_8g028880
2	map00440	Phosphonate and phosphinate metabolism	0.409107	1			Cs_ont_6g012320|Cs_ont_6g022750
5	map00450	Selenocompound metabolism	0.890833	1			Cs_ont_9g019350|Cs_ont_1g029680|Cs_ont_5g013790|Cs_ont_5g050270|Cs_ont_3g002500
28	map00909	Sesquiterpenoid and triterpenoid biosynthesis	0.00114601	1		Metabolism of terpenoids and polyketides	Cs_ont_2g006430|Cs_ont_2g006470|Cs_ont_4g017020|Cs_ont_2g023020|Cs_ont_8g020530|Cs_ont_2g023380|Cs_ont_4g016900|Cs_ont_4g016600|Cs_ont_4g017110|Cs_ont_3g013110|Cs_ont_4g016940|Cs_ont_5g036250|Cs_ont_4g016480|Cs_ont_4g017460|Cs_ont_2g006440|Cs_ont_4g017010|Cs_ont_9g013500|Cs_ont_4g017030|Cs_ont_4g016540|Cs_ont_3g012970|Cs_ont_4g017070|Cs_ont_1g008300|Cs_ont_4g016630|Cs_ont_4g017100|Cs_ont_9g013540…
30	map00900	Terpenoid backbone biosynthesis	0.00224433	1			Cs_ont_6g005160|Cs_ont_3g000500|Cs_ont_3g027900|Cs_ont_5g040710|Cs_ont_5g045910|Cs_ont_6g023800|Cs_ont_5g040040|Cs_ont_1g022340|Cs_ont_8g022540|Cs_ont_3g016380|Cs_ont_1g006280|Cs_ont_8g004820|Cs_ont_6g005190|Cs_ont_8g022740|Cs_ont_3g032970|Cs_ont_6g005170|Cs_ont_6g014950|Cs_ont_8g022290|Cs_ont_5g045900|Cs_ont_8g022530|Cs_ont_2g016590|Cs_ont_8g022690|Cs_ont_9g003790|Cs_ont_8g029350|Cs_ont_1g026160…
8	map00905	Brassinosteroid biosynthesis	0.0418266	1			Cs_ont_7g001390|Cs_ont_1g026560|Cs_ont_1g020280|Cs_ont_1g019190|Cs_ont_2g016170|Cs_ont_4g006620|Cs_ont_1g019220|Cs_ont_1g009730
4	map00902	Monoterpenoid biosynthesis	0.0903204	1			Cs_ont_5g040200|Cs_ont_5g002790|Cs_ont_5g002760|Cs_ont_5g002780
4	map00903	Limonene and pinene degradation	0.143079	1			Cs_ont_5g046100|Cs_ont_2g032290|Cs_ont_7g024770|Cs_ont_1g027440
18	map00906	Carotenoid biosynthesis	0.183012	1			Cs_ont_5g015520|Cs_ont_6g003200|Cs_ont_5g015510|Cs_ont_5g033020|Cs_ont_7g017960|Cs_ont_1g024950|Cs_ont_3g018850|Cs_ont_8g024610|Cs_ont_6g023120|Cs_ont_5g011080|Cs_ont_8g002260|Cs_ont_9g026440|Cs_ont_6g006970|Cs_ont_2g002030|Cs_ont_2g034830|Cs_ont_4g004410|Cs_ont_8g009690|Cs_ont_3g018730
8	map00904	Diterpenoid biosynthesis	0.541587	1			Cs_ont_5g032520|Cs_ont_9g000810|Cs_ont_2g005610|Cs_ont_9g028090|Cs_ont_5g033110|Cs_ont_5g014000|Cs_ont_7g011510|Cs_ont_7g011500
9	map00908	Zeatin biosynthesis	0.989245	1			Cs_ont_9g004580|Cs_ont_6g003950|Cs_ont_8g016030|Cs_ont_9g018520|Cs_ont_3g023640|Cs_ont_3g003070|Cs_ont_3g023660|Cs_ont_6g016450|Cs_ont_9g019180
35	map00230	Purine metabolism	0.135816	1		Nucleotide metabolism	Cs_ont_1g003730|Cs_ont_5g015490|Cs_ont_1g001120|Cs_ont_7g011620|Cs_ont_5g041900|Cs_ont_7g022610|Cs_ont_2g005280|Cs_ont_8g019860|Cs_ont_3g030880|Cs_ont_7g009610|Cs_ont_3g002500|Cs_ont_5g027420|Cs_ont_3g006740|Cs_ont_1g019290|Cs_ont_5g014870|Cs_ont_5g007780|Cs_ont_7g017080|Cs_ont_8g010940|Cs_ont_5g044970|Cs_ont_2g010070|Cs_ont_1g002240|Cs_ont_7g026480|Cs_ont_7g001690|Cs_ont_2g023830|Cs_ont_8g019910…
22	map00240	Pyrimidine metabolism	0.391925	0.0764149			Cs_ont_1g003730|Cs_ont_5g000220|Cs_ont_5g015490|Cs_ont_2g017530|Cs_ont_7g020320|Cs_ont_1g004600|Cs_ont_1g015820|Cs_ont_3g030880|Cs_ont_9g028660|Cs_ont_1g001120|Cs_ont_7g015630|Cs_ont_5g022490|Cs_ont_9g019270|Cs_ont_7g017080|Cs_ont_3g003800|Cs_ont_8g013020|Cs_ont_7g026480|Cs_ont_7g001690|Cs_ont_8g013180|Cs_ont_7g020220|Cs_ont_4g027290|Cs_ont_5g044320
20	map04712	Circadian rhythm - plant	0.0150514	0.597444	Organismal Systems	Environmental adaptation	Cs_ont_8g003840|Cs_ont_3g009610|Cs_ont_5g005500|Cs_ont_5g030270|Cs_ont_5g006010|Cs_ont_6g025180|Cs_ont_9g012610|Cs_ont_5g005390|Cs_ont_3g013510|Cs_ont_3g008580|Cs_ont_1g023810|Cs_ont_2g013730|Cs_ont_3g006910|Cs_ont_1g020770|Cs_ont_8g017240|Cs_ont_3g010970|Cs_ont_6g019050|Cs_ont_2g025700|Cs_ont_2g001190|Cs_ont_5g005510
75	map04626	Plant-pathogen interaction	0.321353	1			Cs_ont_6g012480|Cs_ont_8g022930|Cs_ont_5g018270|Cs_ont_4g018850|Cs_ont_5g046110|Cs_ont_3g015480|Cs_ont_4g018940|Cs_ont_9g027380|Cs_ont_5g005190|Cs_ont_3g019270|Cs_ont_1g008000|Cs_ont_5g003720|Cs_ont_3g008630|Cs_ont_9g006530|Cs_ont_8g027120|Cs_ont_9g006670|Cs_ont_4g006740|Cs_ont_4g018690|Cs_ont_9g000350|Cs_ont_8g004060|Cs_ont_5g043990|Cs_ont_5g015000|Cs_ont_4g009390|Cs_ont_7g027410|Cs_ont_9g001210…

## Sheet: Table S5
Table S5 The 1568 differentially expressed genes (DEGs) were enriched in the KEGG analysis.
Gene_id	C17_1_vs_C17_4	C17_4_vs_C17_7	C17_1_vs_C17_7	Sum
Cs_ont_9g000570	yes|down	yes|down	yes|down	3
Cs_ont_8g019590	yes|down	yes|down	yes|down	3
Cs_ont_8g009690	yes|down	yes|up	yes|down	3
Cs_ont_8g007770	yes|down	yes|down	yes|down	3
Cs_ont_8g006100	yes|down	yes|up	yes|down	3
Cs_ont_8g003200	yes|down	yes|down	yes|down	3
Cs_ont_8g002980	yes|down	yes|down	yes|down	3
Cs_ont_8g002810	yes|down	yes|down	yes|down	3
Cs_ont_8g001810	yes|down	yes|down	yes|down	3
Cs_ont_7g016920	yes|down	yes|up	yes|down	3
Cs_ont_7g016910	yes|down	yes|up	yes|down	3
Cs_ont_7g013870	yes|down	yes|up	yes|down	3
Cs_ont_7g004720	yes|down	yes|up	yes|down	3
Cs_ont_6g025180	yes|down	yes|down	yes|down	3
Cs_ont_6g018080	yes|down	yes|down	yes|down	3
Cs_ont_6g012770	yes|down	yes|down	yes|down	3
Cs_ont_6g012760	yes|down	yes|down	yes|down	3
Cs_ont_6g000820	yes|down	yes|down	yes|down	3
Cs_ont_5g048470	yes|down	yes|down	yes|down	3
Cs_ont_5g045520	yes|down	yes|down	yes|down	3
Cs_ont_5g044220	yes|down	yes|down	yes|down	3
Cs_ont_5g041770	yes|down	yes|up	yes|down	3
Cs_ont_5g030470	yes|down	yes|down	yes|down	3
Cs_ont_5g024640	yes|down	yes|up	yes|down	3
Cs_ont_5g012290	yes|down	yes|down	yes|down	3
Cs_ont_5g011660	yes|down	yes|down	yes|down	3
Cs_ont_5g006610	yes|down	yes|down	yes|down	3
Cs_ont_5g006160	yes|down	yes|up	yes|down	3
Cs_ont_5g003720	yes|down	yes|up	yes|down	3
Cs_ont_4g017460	yes|down	yes|down	yes|down	3
Cs_ont_4g006230	yes|down	yes|down	yes|down	3
Cs_ont_3g031130	yes|down	yes|down	yes|down	3
Cs_ont_3g024430	yes|down	yes|down	yes|down	3
Cs_ont_3g018450	yes|down	yes|down	yes|down	3
Cs_ont_3g014930	yes|down	yes|down	yes|down	3
Cs_ont_3g013820	yes|down	yes|down	yes|down	3
Cs_ont_3g012580	yes|down	yes|down	yes|down	3
Cs_ont_3g009960	yes|down	yes|up	yes|down	3
Cs_ont_3g007440	yes|down	yes|down	yes|down	3
Cs_ont_3g005820	yes|down	yes|up	yes|down	3
Cs_ont_2g034280	yes|down	yes|up	yes|down	3
Cs_ont_2g034230	yes|down	yes|up	yes|down	3
Cs_ont_2g019460	yes|down	yes|down	yes|down	3
Cs_ont_2g015860	yes|down	yes|down	yes|down	3
Cs_ont_2g010790	yes|down	yes|up	yes|down	3
Cs_ont_2g010070	yes|down	yes|down	yes|down	3
Cs_ont_2g009150	yes|down	yes|down	yes|down	3
Cs_ont_2g002030	yes|down	yes|down	yes|down	3
Cs_ont_1g024230	yes|down	yes|up	yes|down	3
Cs_ont_1g016340	yes|down	yes|down	yes|down	3
Cs_ont_1g014200	yes|down	yes|down	yes|down	3
Cs_ont_1g010810	yes|down	yes|down	yes|down	3
Cs_ont_1g010380	yes|down	yes|down	yes|down	3
Cs_ont_9g023740	yes|down	yes|up	yes|up	3
Cs_ont_8g019270	yes|down	yes|up	yes|up	3
Cs_ont_6g013460	yes|down	yes|up	yes|up	3
Cs_ont_5g009120	yes|down	yes|up	yes|up	3
Cs_ont_4g023960	yes|down	yes|up	yes|up	3
Cs_ont_2g024740	yes|down	yes|up	yes|up	3
Cs_ont_1g022340	yes|down	yes|up	yes|up	3
Cs_ont_1g019190	yes|down	yes|up	yes|up	3
Cs_ont_9g006670	yes|up	yes|down	yes|down	3
Cs_ont_7g019670	yes|up	yes|down	yes|down	3
Cs_ont_9g026970	yes|up	yes|up	yes|up	3
Cs_ont_9g013540	yes|up	yes|up	yes|up	3
Cs_ont_9g013500	yes|up	yes|up	yes|up	3
Cs_ont_9g010720	yes|up	yes|up	yes|up	3
Cs_ont_9g006880	yes|up	yes|up	yes|up	3
Cs_ont_9g001380	yes|up	yes|up	yes|up	3
Cs_ont_8g028740	yes|up	yes|up	yes|up	3
Cs_ont_8g028710	yes|up	yes|up	yes|up	3
Cs_ont_8g010070	yes|up	yes|up	yes|up	3
Cs_ont_8g007560	yes|up	yes|up	yes|up	3
Cs_ont_7g029090	yes|up	yes|up	yes|up	3
Cs_ont_7g024220	yes|up	yes|up	yes|up	3
Cs_ont_7g017540	yes|up	yes|up	yes|up	3
Cs_ont_7g017500	yes|up	yes|up	yes|up	3
Cs_ont_7g014880	yes|up	yes|up	yes|up	3
Cs_ont_7g009950	yes|up	yes|up	yes|up	3
Cs_ont_7g006100	yes|up	yes|up	yes|up	3
Cs_ont_7g005990	yes|up	yes|up	yes|up	3
Cs_ont_7g005590	yes|up	yes|up	yes|up	3
Cs_ont_7g004690	yes|up	yes|up	yes|up	3
Cs_ont_7g004500	yes|up	yes|up	yes|up	3
Cs_ont_7g003040	yes|up	yes|up	yes|up	3
Cs_ont_6g026130	yes|up	yes|up	yes|up	3
Cs_ont_6g025120	yes|up	yes|up	yes|up	3
Cs_ont_6g022520	yes|up	yes|up	yes|up	3
Cs_ont_6g021660	yes|up	yes|up	yes|up	3
Cs_ont_6g020600	yes|up	yes|up	yes|up	3
Cs_ont_6g016760	yes|up	yes|up	yes|up	3
Cs_ont_6g005610	yes|up	yes|up	yes|up	3
Cs_ont_6g005180	yes|up	yes|up	yes|up	3
Cs_ont_5g047300	yes|up	yes|up	yes|up	3
Cs_ont_5g039940	yes|up	yes|up	yes|up	3
Cs_ont_5g024890	yes|up	yes|up	yes|up	3
Cs_ont_5g020090	yes|up	yes|up	yes|up	3
Cs_ont_5g016610	yes|up	yes|up	yes|up	3
Cs_ont_5g006010	yes|up	yes|up	yes|up	3
Cs_ont_5g002790	yes|up	yes|up	yes|up	3
Cs_ont_4g016940	yes|up	yes|up	yes|up	3
Cs_ont_4g016900	yes|up	yes|up	yes|up	3
Cs_ont_4g016630	yes|up	yes|up	yes|up	3
Cs_ont_4g012320	yes|up	yes|up	yes|up	3
Cs_ont_4g007400	yes|up	yes|up	yes|up	3
Cs_ont_4g000010	yes|up	yes|up	yes|up	3
Cs_ont_3g013110	yes|up	yes|up	yes|up	3
Cs_ont_3g011210	yes|up	yes|up	yes|up	3
Cs_ont_3g008370	yes|up	yes|up	yes|up	3
Cs_ont_2g034830	yes|up	yes|up	yes|up	3
Cs_ont_2g033700	yes|up	yes|up	yes|up	3
Cs_ont_2g033680	yes|up	yes|up	yes|up	3
Cs_ont_2g030090	yes|up	yes|up	yes|up	3
Cs_ont_2g025700	yes|up	yes|up	yes|up	3
Cs_ont_2g008050	yes|up	yes|up	yes|up	3
Cs_ont_1g026560	yes|up	yes|up	yes|up	3
Cs_ont_1g024770	yes|up	yes|up	yes|up	3
Cs_ont_1g020400	yes|up	yes|up	yes|up	3
Cs_ont_1g015040	yes|up	yes|up	yes|up	3
Cs_ont_1g009730	yes|up	yes|up	yes|up	3
Cs_ont_Un000270	no|down	yes|down	yes|down	2
Cs_ont_9g028390	no|down	yes|down	yes|down	2
Cs_ont_9g026490	no|down	yes|down	yes|down	2
Cs_ont_9g024590	no|down	yes|down	yes|down	2
Cs_ont_9g020820	no|down	yes|down	yes|down	2
Cs_ont_9g011940	no|down	yes|down	yes|down	2
Cs_ont_9g009520	no|down	yes|down	yes|down	2
Cs_ont_9g009470	no|down	yes|down	yes|down	2
Cs_ont_9g007120	no|down	yes|down	yes|down	2
Cs_ont_9g006220	no|down	yes|down	yes|down	2
Cs_ont_9g005510	no|down	yes|down	yes|down	2
Cs_ont_9g002270	no|down	yes|down	yes|down	2
Cs_ont_9g000760	no|down	yes|down	yes|down	2
Cs_ont_8g028160	no|down	yes|down	yes|down	2
Cs_ont_8g024930	no|down	yes|down	yes|down	2
Cs_ont_8g021280	no|down	yes|down	yes|down	2
Cs_ont_8g019860	no|down	yes|down	yes|down	2
Cs_ont_8g013180	no|down	yes|down	yes|down	2
Cs_ont_8g013020	no|down	yes|down	yes|down	2
Cs_ont_8g009110	no|down	yes|down	yes|down	2
Cs_ont_8g007840	no|down	yes|down	yes|down	2
Cs_ont_8g007700	no|down	yes|down	yes|down	2
Cs_ont_8g005730	no|down	yes|down	yes|down	2
Cs_ont_7g024280	no|down	yes|down	yes|down	2
Cs_ont_7g022300	no|down	yes|down	yes|down	2
Cs_ont_7g021120	no|down	yes|down	yes|down	2
Cs_ont_7g014560	no|down	yes|down	yes|down	2
Cs_ont_7g014070	no|down	yes|down	yes|down	2
Cs_ont_7g009760	no|down	yes|down	yes|down	2
Cs_ont_7g004280	no|down	yes|down	yes|down	2
Cs_ont_7g001390	no|down	yes|down	yes|down	2
Cs_ont_7g000290	no|down	yes|down	yes|down	2
Cs_ont_6g026110	no|down	yes|down	yes|down	2
Cs_ont_6g026070	no|down	yes|down	yes|down	2
Cs_ont_6g019300	no|down	yes|down	yes|down	2
Cs_ont_6g017050	no|down	yes|down	yes|down	2
Cs_ont_6g010160	no|down	yes|down	yes|down	2
Cs_ont_6g008710	no|down	yes|down	yes|down	2
Cs_ont_6g007680	no|down	yes|down	yes|down	2
Cs_ont_6g006780	no|down	yes|down	yes|down	2
Cs_ont_6g000370	no|down	yes|down	yes|down	2
Cs_ont_5g045240	no|down	yes|down	yes|down	2
Cs_ont_5g025020	no|down	yes|down	yes|down	2
Cs_ont_5g018280	no|down	yes|down	yes|down	2
Cs_ont_5g011190	no|down	yes|down	yes|down	2
Cs_ont_5g008650	no|down	yes|down	yes|down	2
Cs_ont_5g007980	no|down	yes|down	yes|down	2
Cs_ont_5g005510	no|down	yes|down	yes|down	2
Cs_ont_5g005320	no|down	yes|down	yes|down	2
Cs_ont_5g001760	no|down	yes|down	yes|down	2
Cs_ont_4g026410	no|down	yes|down	yes|down	2
Cs_ont_4g025920	no|down	yes|down	yes|down	2
Cs_ont_4g025170	no|down	yes|down	yes|down	2
Cs_ont_4g023620	no|down	yes|down	yes|down	2
Cs_ont_4g023610	no|down	yes|down	yes|down	2
Cs_ont_4g022790	no|down	yes|down	yes|down	2
Cs_ont_4g019930	no|down	yes|down	yes|down	2
Cs_ont_4g013970	no|down	yes|down	yes|down	2
Cs_ont_4g009100	no|down	yes|down	yes|down	2
Cs_ont_4g004790	no|down	yes|down	yes|down	2
Cs_ont_4g004410	no|down	yes|down	yes|down	2
Cs_ont_4g003990	no|down	yes|down	yes|down	2
Cs_ont_3g024900	no|down	yes|down	yes|down	2
Cs_ont_3g018370	no|down	yes|down	yes|down	2
Cs_ont_3g015010	no|down	yes|down	yes|down	2
Cs_ont_3g013810	no|down	yes|down	yes|down	2
Cs_ont_3g013190	no|down	yes|down	yes|down	2
Cs_ont_3g012880	no|down	yes|down	yes|down	2
Cs_ont_3g009930	no|down	yes|down	yes|down	2
Cs_ont_3g008270	no|down	yes|down	yes|down	2
Cs_ont_3g006900	no|down	yes|down	yes|down	2
Cs_ont_2g028480	no|down	yes|down	yes|down	2
Cs_ont_2g028290	no|down	yes|down	yes|down	2
Cs_ont_2g013830	no|down	yes|down	yes|down	2
Cs_ont_2g009070	no|down	yes|down	yes|down	2
Cs_ont_2g008190	no|down	yes|down	yes|down	2
Cs_ont_2g000110	no|down	yes|down	yes|down	2
Cs_ont_1g027770	no|down	yes|down	yes|down	2
Cs_ont_1g025410	no|down	yes|down	yes|down	2
Cs_ont_1g023380	no|down	yes|down	yes|down	2
Cs_ont_1g021520	no|down	yes|down	yes|down	2
Cs_ont_1g021470	no|down	yes|down	yes|down	2
Cs_ont_1g016680	no|down	yes|down	yes|down	2
Cs_ont_1g009700	no|down	yes|down	yes|down	2
Cs_ont_1g000600	no|down	yes|down	yes|down	2
Cs_ont_1g000500	no|down	yes|down	yes|down	2
Cs_ont_9g027570	no|down	yes|up	yes|up	2
Cs_ont_9g026480	no|down	yes|up	yes|up	2
Cs_ont_9g013880	no|down	yes|up	yes|up	2
Cs_ont_9g009140	no|down	yes|up	yes|up	2
Cs_ont_9g008300	no|down	yes|up	yes|up	2
Cs_ont_9g004060	no|down	yes|up	yes|up	2
Cs_ont_8g027380	no|down	yes|up	yes|up	2
Cs_ont_8g007110	no|down	yes|up	yes|up	2
Cs_ont_8g001600	no|down	yes|up	yes|up	2
Cs_ont_7g025640	no|down	yes|up	yes|up	2
Cs_ont_6g024400	no|down	yes|up	yes|up	2
Cs_ont_6g019050	no|down	yes|up	yes|up	2
Cs_ont_6g016590	no|down	yes|up	yes|up	2
Cs_ont_6g011310	no|down	yes|up	yes|up	2
Cs_ont_6g010670	no|down	yes|up	yes|up	2
Cs_ont_6g007590	no|down	yes|up	yes|up	2
Cs_ont_5g042040	no|down	yes|up	yes|up	2
Cs_ont_5g040750	no|down	yes|up	yes|up	2
Cs_ont_5g030270	no|down	yes|up	yes|up	2
Cs_ont_5g014090	no|down	yes|up	yes|up	2
Cs_ont_5g005120	no|down	yes|up	yes|up	2
Cs_ont_3g030260	no|down	yes|up	yes|up	2
Cs_ont_3g030250	no|down	yes|up	yes|up	2
Cs_ont_3g015480	no|down	yes|up	yes|up	2
Cs_ont_2g034300	no|down	yes|up	yes|up	2
Cs_ont_2g033720	no|down	yes|up	yes|up	2
Cs_ont_2g033660	no|down	yes|up	yes|up	2
Cs_ont_2g020760	no|down	yes|up	yes|up	2
Cs_ont_2g018770	no|down	yes|up	yes|up	2
Cs_ont_2g018470	no|down	yes|up	yes|up	2
Cs_ont_2g006830	no|down	yes|up	yes|up	2
Cs_ont_2g004050	no|down	yes|up	yes|up	2
Cs_ont_1g021530	no|down	yes|up	yes|up	2
Cs_ont_1g020770	no|down	yes|up	yes|up	2
Cs_ont_1g018180	no|down	yes|up	yes|up	2
Cs_ont_1g017070	no|down	yes|up	yes|up	2
Cs_ont_1g000570	no|down	yes|up	yes|up	2
Cs_ont_5g044230	no|no test	yes|down	yes|down	2
Cs_ont_5g020290	no|no test	yes|down	yes|down	2
Cs_ont_1g002940	no|no test	yes|down	yes|down	2
Cs_ont_8g028430	no|up	yes|down	yes|down	2
Cs_ont_8g006710	no|up	yes|down	yes|down	2
Cs_ont_7g006810	no|up	yes|down	yes|down	2
Cs_ont_6g016010	no|up	yes|down	yes|down	2
Cs_ont_6g007970	no|up	yes|down	yes|down	2
Cs_ont_5g044460	no|up	yes|down	yes|down	2
Cs_ont_5g043520	no|up	yes|down	yes|down	2
Cs_ont_5g009990	no|up	yes|down	yes|down	2
Cs_ont_4g017410	no|up	yes|down	yes|down	2
Cs_ont_4g011410	no|up	yes|down	yes|down	2
Cs_ont_4g007860	no|up	yes|down	yes|down	2
Cs_ont_4g000850	no|up	yes|down	yes|down	2
Cs_ont_3g008580	no|up	yes|down	yes|down	2
Cs_ont_3g006400	no|up	yes|down	yes|down	2
Cs_ont_1g015020	no|up	yes|down	yes|down	2
Cs_ont_Un004560	no|up	yes|up	yes|up	2
Cs_ont_9g023650	no|up	yes|up	yes|up	2
Cs_ont_9g015160	no|up	yes|up	yes|up	2
Cs_ont_9g003790	no|up	yes|up	yes|up	2
Cs_ont_9g000410	no|up	yes|up	yes|up	2
Cs_ont_8g026860	no|up	yes|up	yes|up	2
Cs_ont_8g024920	no|up	yes|up	yes|up	2
Cs_ont_8g022740	no|up	yes|up	yes|up	2
Cs_ont_8g020530	no|up	yes|up	yes|up	2
Cs_ont_8g018730	no|up	yes|up	yes|up	2
Cs_ont_8g014690	no|up	yes|up	yes|up	2
Cs_ont_8g014080	no|up	yes|up	yes|up	2
Cs_ont_8g011060	no|up	yes|up	yes|up	2
Cs_ont_8g011010	no|up	yes|up	yes|up	2
Cs_ont_8g004820	no|up	yes|up	yes|up	2
Cs_ont_8g003840	no|up	yes|up	yes|up	2
Cs_ont_8g003380	no|up	yes|up	yes|up	2
Cs_ont_8g002940	no|up	yes|up	yes|up	2
Cs_ont_7g022160	no|up	yes|up	yes|up	2
Cs_ont_7g020320	no|up	yes|up	yes|up	2
Cs_ont_7g019350	no|up	yes|up	yes|up	2
Cs_ont_7g013360	no|up	yes|up	yes|up	2
Cs_ont_7g011510	no|up	yes|up	yes|up	2
Cs_ont_7g004290	no|up	yes|up	yes|up	2
Cs_ont_7g002030	no|up	yes|up	yes|up	2
Cs_ont_6g025150	no|up	yes|up	yes|up	2
Cs_ont_6g020660	no|up	yes|up	yes|up	2
Cs_ont_6g020620	no|up	yes|up	yes|up	2
Cs_ont_6g019320	no|up	yes|up	yes|up	2
Cs_ont_6g015360	no|up	yes|up	yes|up	2
Cs_ont_6g014990	no|up	yes|up	yes|up	2
Cs_ont_6g007010	no|up	yes|up	yes|up	2
Cs_ont_5g050270	no|up	yes|up	yes|up	2
Cs_ont_5g049910	no|up	yes|up	yes|up	2
Cs_ont_5g046400	no|up	yes|up	yes|up	2
Cs_ont_5g045910	no|up	yes|up	yes|up	2
Cs_ont_5g040710	no|up	yes|up	yes|up	2
Cs_ont_5g040040	no|up	yes|up	yes|up	2
Cs_ont_5g032610	no|up	yes|up	yes|up	2
Cs_ont_5g027420	no|up	yes|up	yes|up	2
Cs_ont_5g024960	no|up	yes|up	yes|up	2
Cs_ont_5g024910	no|up	yes|up	yes|up	2
Cs_ont_5g021100	no|up	yes|up	yes|up	2
Cs_ont_5g021010	no|up	yes|up	yes|up	2
Cs_ont_5g019520	no|up	yes|up	yes|up	2
Cs_ont_5g018060	no|up	yes|up	yes|up	2
Cs_ont_5g018050	no|up	yes|up	yes|up	2
Cs_ont_5g013020	no|up	yes|up	yes|up	2
Cs_ont_5g011340	no|up	yes|up	yes|up	2
Cs_ont_5g010360	no|up	yes|up	yes|up	2
Cs_ont_5g009240	no|up	yes|up	yes|up	2
Cs_ont_5g008300	no|up	yes|up	yes|up	2
Cs_ont_5g005390	no|up	yes|up	yes|up	2
Cs_ont_5g002760	no|up	yes|up	yes|up	2
Cs_ont_4g024900	no|up	yes|up	yes|up	2
Cs_ont_4g022570	no|up	yes|up	yes|up	2
Cs_ont_4g021730	no|up	yes|up	yes|up	2
Cs_ont_4g015540	no|up	yes|up	yes|up	2
Cs_ont_4g015190	no|up	yes|up	yes|up	2
Cs_ont_4g011080	no|up	yes|up	yes|up	2
Cs_ont_4g007960	no|up	yes|up	yes|up	2
Cs_ont_4g005640	no|up	yes|up	yes|up	2
Cs_ont_3g033470	no|up	yes|up	yes|up	2
Cs_ont_3g028560	no|up	yes|up	yes|up	2
Cs_ont_3g027290	no|up	yes|up	yes|up	2
Cs_ont_3g017540	no|up	yes|up	yes|up	2
Cs_ont_3g011270	no|up	yes|up	yes|up	2
Cs_ont_3g006980	no|up	yes|up	yes|up	2
Cs_ont_3g006910	no|up	yes|up	yes|up	2
Cs_ont_3g001630	no|up	yes|up	yes|up	2
Cs_ont_3g001620	no|up	yes|up	yes|up	2
Cs_ont_3g000770	no|up	yes|up	yes|up	2
Cs_ont_2g034290	no|up	yes|up	yes|up	2
Cs_ont_2g034240	no|up	yes|up	yes|up	2
Cs_ont_2g017340	no|up	yes|up	yes|up	2
Cs_ont_2g014520	no|up	yes|up	yes|up	2
Cs_ont_2g013730	no|up	yes|up	yes|up	2
Cs_ont_2g009080	no|up	yes|up	yes|up	2
Cs_ont_2g007730	no|up	yes|up	yes|up	2
Cs_ont_2g007000	no|up	yes|up	yes|up	2
Cs_ont_2g006520	no|up	yes|up	yes|up	2
Cs_ont_2g002640	no|up	yes|up	yes|up	2
Cs_ont_2g002630	no|up	yes|up	yes|up	2
Cs_ont_2g002610	no|up	yes|up	yes|up	2
Cs_ont_2g002600	no|up	yes|up	yes|up	2
Cs_ont_2g002590	no|up	yes|up	yes|up	2
Cs_ont_2g002580	no|up	yes|up	yes|up	2
Cs_ont_1g026210	no|up	yes|up	yes|up	2
Cs_ont_1g025870	no|up	yes|up	yes|up	2
Cs_ont_1g021460	no|up	yes|up	yes|up	2
Cs_ont_1g020990	no|up	yes|up	yes|up	2
Cs_ont_1g020980	no|up	yes|up	yes|up	2
Cs_ont_1g016810	no|up	yes|up	yes|up	2
Cs_ont_1g013100	no|up	yes|up	yes|up	2
Cs_ont_1g006280	no|up	yes|up	yes|up	2
Cs_ont_1g005550	no|up	yes|up	yes|up	2
Cs_ont_9g027010	yes|down	yes|up	no|down	2
Cs_ont_9g010960	yes|down	yes|up	no|down	2
Cs_ont_9g010840	yes|down	yes|up	no|down	2
Cs_ont_9g003910	yes|down	yes|up	no|down	2
Cs_ont_8g015870	yes|down	yes|up	no|down	2
Cs_ont_8g008390	yes|down	yes|up	no|down	2
Cs_ont_8g005720	yes|down	yes|up	no|down	2
Cs_ont_7g017890	yes|down	yes|up	no|down	2
Cs_ont_7g017050	yes|down	yes|up	no|down	2
Cs_ont_7g011730	yes|down	yes|up	no|down	2
Cs_ont_7g011620	yes|down	yes|up	no|down	2
Cs_ont_7g010850	yes|down	yes|up	no|down	2
Cs_ont_7g008250	yes|down	yes|up	no|down	2
Cs_ont_6g025650	yes|down	yes|up	no|down	2
Cs_ont_6g014400	yes|down	yes|up	no|down	2
Cs_ont_6g013390	yes|down	yes|up	no|down	2
Cs_ont_6g012480	yes|down	yes|up	no|down	2
Cs_ont_6g007180	yes|down	yes|up	no|down	2
Cs_ont_6g002050	yes|down	yes|up	no|down	2
Cs_ont_5g047940	yes|down	yes|up	no|down	2
Cs_ont_5g045940	yes|down	yes|up	no|down	2
Cs_ont_5g044180	yes|down	yes|up	no|down	2
Cs_ont_5g033110	yes|down	yes|up	no|down	2
Cs_ont_5g011900	yes|down	yes|up	no|down	2
Cs_ont_5g004440	yes|down	yes|up	no|down	2
Cs_ont_4g026880	yes|down	yes|up	no|down	2
Cs_ont_4g025760	yes|down	yes|up	no|down	2
Cs_ont_4g018690	yes|down	yes|up	no|down	2
Cs_ont_4g013100	yes|down	yes|up	no|down	2
Cs_ont_4g010400	yes|down	yes|up	no|down	2
Cs_ont_4g006060	yes|down	yes|up	no|down	2
Cs_ont_4g005230	yes|down	yes|up	no|down	2
Cs_ont_3g015260	yes|down	yes|up	no|down	2
Cs_ont_3g007930	yes|down	yes|up	no|down	2
Cs_ont_3g007870	yes|down	yes|up	no|down	2
Cs_ont_2g018300	yes|down	yes|up	no|down	2
Cs_ont_2g005780	yes|down	yes|up	no|down	2
Cs_ont_1g028350	yes|down	yes|up	no|down	2
Cs_ont_1g022750	yes|down	yes|up	no|down	2
Cs_ont_1g021960	yes|down	yes|up	no|down	2
Cs_ont_1g020160	yes|down	yes|up	no|down	2
Cs_ont_1g019290	yes|down	yes|up	no|down	2
Cs_ont_8g019290	yes|down	yes|up	no|no test	2
Cs_ont_1g001210	yes|down	yes|up	no|no test	2
Cs_ont_Un003330	yes|down	yes|up	no|up	2
Cs_ont_9g010850	yes|down	yes|up	no|up	2
Cs_ont_9g010810	yes|down	yes|up	no|up	2
Cs_ont_9g008010	yes|down	yes|up	no|up	2
Cs_ont_9g007600	yes|down	yes|up	no|up	2
Cs_ont_9g003780	yes|down	yes|up	no|up	2
Cs_ont_8g029350	yes|down	yes|up	no|up	2
Cs_ont_8g027120	yes|down	yes|up	no|up	2
Cs_ont_8g027100	yes|down	yes|up	no|up	2
Cs_ont_8g016100	yes|down	yes|up	no|up	2
Cs_ont_8g002260	yes|down	yes|up	no|up	2
Cs_ont_7g024400	yes|down	yes|up	no|up	2
Cs_ont_7g003960	yes|down	yes|up	no|up	2
Cs_ont_7g003880	yes|down	yes|up	no|up	2
Cs_ont_7g003840	yes|down	yes|up	no|up	2
Cs_ont_7g001110	yes|down	yes|up	no|up	2
Cs_ont_6g007610	yes|down	yes|up	no|up	2
Cs_ont_6g007120	yes|down	yes|up	no|up	2
Cs_ont_5g047630	yes|down	yes|up	no|up	2
Cs_ont_5g046500	yes|down	yes|up	no|up	2
Cs_ont_5g045700	yes|down	yes|up	no|up	2
Cs_ont_5g029560	yes|down	yes|up	no|up	2
Cs_ont_5g010790	yes|down	yes|up	no|up	2
Cs_ont_4g020390	yes|down	yes|up	no|up	2
Cs_ont_4g020230	yes|down	yes|up	no|up	2
Cs_ont_4g014780	yes|down	yes|up	no|up	2
Cs_ont_4g005400	yes|down	yes|up	no|up	2
Cs_ont_4g001800	yes|down	yes|up	no|up	2
Cs_ont_3g015670	yes|down	yes|up	no|up	2
Cs_ont_3g009950	yes|down	yes|up	no|up	2
Cs_ont_3g001310	yes|down	yes|up	no|up	2
Cs_ont_3g000240	yes|down	yes|up	no|up	2
Cs_ont_2g033670	yes|down	yes|up	no|up	2
Cs_ont_2g023380	yes|down	yes|up	no|up	2
Cs_ont_2g010740	yes|down	yes|up	no|up	2
Cs_ont_2g007350	yes|down	yes|up	no|up	2
Cs_ont_2g006470	yes|down	yes|up	no|up	2
Cs_ont_2g003960	yes|down	yes|up	no|up	2
Cs_ont_1g029150	yes|down	yes|up	no|up	2
Cs_ont_1g020150	yes|down	yes|up	no|up	2
Cs_ont_1g020030	yes|down	yes|up	no|up	2
Cs_ont_1g015070	yes|down	yes|up	no|up	2
Cs_ont_1g008300	yes|down	yes|up	no|up	2
Cs_ont_Un000460	yes|down	no|down	yes|down	2
Cs_ont_9g028560	yes|down	no|up	yes|down	2
Cs_ont_9g028550	yes|down	no|down	yes|down	2
Cs_ont_9g027450	yes|down	no|up	yes|down	2
Cs_ont_9g027400	yes|down	no|up	yes|down	2
Cs_ont_9g022430	yes|down	no|down	yes|down	2
Cs_ont_9g020870	yes|down	no|up	yes|down	2
Cs_ont_9g019180	yes|down	no|up	yes|down	2
Cs_ont_9g018730	yes|down	no|down	yes|down	2
Cs_ont_9g018520	yes|down	no|down	yes|down	2
Cs_ont_9g014770	yes|down	no|up	yes|down	2
Cs_ont_9g010690	yes|down	no|down	yes|down	2
Cs_ont_9g010650	yes|down	no|up	yes|down	2
Cs_ont_9g008260	yes|down	no|up	yes|down	2
Cs_ont_9g008110	yes|down	no|up	yes|down	2
Cs_ont_9g006910	yes|down	no|up	yes|down	2
Cs_ont_9g006500	yes|down	no|up	yes|down	2
Cs_ont_9g001740	yes|down	no|down	yes|down	2
Cs_ont_9g001730	yes|down	no|up	yes|down	2
Cs_ont_9g001600	yes|down	no|down	yes|down	2
Cs_ont_9g000810	yes|down	no|up	yes|down	2
Cs_ont_9g000450	yes|down	no|up	yes|down	2
Cs_ont_8g027930	yes|down	no|down	yes|down	2
Cs_ont_8g027770	yes|down	no|up	yes|down	2
Cs_ont_8g027150	yes|down	no|down	yes|down	2
Cs_ont_8g025810	yes|down	no|up	yes|down	2
Cs_ont_8g025020	yes|down	no|down	yes|down	2
Cs_ont_8g024540	yes|down	no|up	yes|down	2
Cs_ont_8g022970	yes|down	no|down	yes|down	2
Cs_ont_8g022460	yes|down	no|up	yes|down	2
Cs_ont_8g020280	yes|down	no|down	yes|down	2
Cs_ont_8g019330	yes|down	no|down	yes|down	2
Cs_ont_8g019320	yes|down	no|up	yes|down	2
Cs_ont_8g017240	yes|down	no|up	yes|down	2
Cs_ont_8g016030	yes|down	no|up	yes|down	2
Cs_ont_8g012170	yes|down	no|down	yes|down	2
Cs_ont_8g011130	yes|down	no|down	yes|down	2
Cs_ont_8g008850	yes|down	no|up	yes|down	2
Cs_ont_8g007750	yes|down	no|down	yes|down	2
Cs_ont_8g006770	yes|down	no|up	yes|down	2
Cs_ont_8g005360	yes|down	no|up	yes|down	2
Cs_ont_8g005350	yes|down	no|up	yes|down	2
Cs_ont_8g004060	yes|down	no|up	yes|down	2
Cs_ont_8g003530	yes|down	no|up	yes|down	2
Cs_ont_8g002910	yes|down	no|down	yes|down	2
Cs_ont_8g001570	yes|down	no|down	yes|down	2
Cs_ont_8g001460	yes|down	no|up	yes|down	2
Cs_ont_8g000630	yes|down	no|down	yes|down	2
Cs_ont_7g028320	yes|down	no|up	yes|down	2
Cs_ont_7g027440	yes|down	no|down	yes|down	2
Cs_ont_7g027430	yes|down	no|down	yes|down	2
Cs_ont_7g027340	yes|down	no|up	yes|down	2
Cs_ont_7g026380	yes|down	no|up	yes|down	2
Cs_ont_7g024770	yes|down	no|up	yes|down	2
Cs_ont_7g024560	yes|down	no|up	yes|down	2
Cs_ont_7g023220	yes|down	no|up	yes|down	2
Cs_ont_7g023140	yes|down	no|up	yes|down	2
Cs_ont_7g023130	yes|down	no|down	yes|down	2
Cs_ont_7g021630	yes|down	no|down	yes|down	2
Cs_ont_7g020180	yes|down	no|down	yes|down	2
Cs_ont_7g020090	yes|down	no|down	yes|down	2
Cs_ont_7g019870	yes|down	no|up	yes|down	2
Cs_ont_7g015760	yes|down	no|up	yes|down	2
Cs_ont_7g013970	yes|down	no|down	yes|down	2
Cs_ont_7g009270	yes|down	no|down	yes|down	2
Cs_ont_7g008330	yes|down	no|down	yes|down	2
Cs_ont_7g007040	yes|down	no|down	yes|down	2
Cs_ont_7g004640	yes|down	no|down	yes|down	2
Cs_ont_7g003980	yes|down	no|down	yes|down	2
Cs_ont_7g003190	yes|down	no|up	yes|down	2
Cs_ont_7g002120	yes|down	no|down	yes|down	2
Cs_ont_7g000670	yes|down	no|up	yes|down	2
Cs_ont_6g025170	yes|down	no|down	yes|down	2
Cs_ont_6g020010	yes|down	no|up	yes|down	2
Cs_ont_6g019860	yes|down	no|down	yes|down	2
Cs_ont_6g018540	yes|down	no|down	yes|down	2
Cs_ont_6g017830	yes|down	no|down	yes|down	2
Cs_ont_6g016020	yes|down	no|up	yes|down	2
Cs_ont_6g015760	yes|down	no|down	yes|down	2
Cs_ont_6g015280	yes|down	no|down	yes|down	2
Cs_ont_6g015170	yes|down	no|down	yes|down	2
Cs_ont_6g014790	yes|down	no|down	yes|down	2
Cs_ont_6g014530	yes|down	no|down	yes|down	2
Cs_ont_6g013980	yes|down	no|up	yes|down	2
Cs_ont_6g013740	yes|down	no|up	yes|down	2
Cs_ont_6g013730	yes|down	no|up	yes|down	2
Cs_ont_6g009560	yes|down	no|up	yes|down	2
Cs_ont_6g005290	yes|down	no|up	yes|down	2
Cs_ont_6g005080	yes|down	no|up	yes|down	2
Cs_ont_6g003380	yes|down	no|down	yes|down	2
Cs_ont_6g003200	yes|down	no|up	yes|down	2
Cs_ont_6g002270	yes|down	no|down	yes|down	2
Cs_ont_6g002190	yes|down	no|down	yes|down	2
Cs_ont_6g001510	yes|down	no|up	yes|down	2
Cs_ont_6g000990	yes|down	no|up	yes|down	2
Cs_ont_5g048890	yes|down	no|up	yes|down	2
Cs_ont_5g048560	yes|down	no|up	yes|down	2
Cs_ont_5g048150	yes|down	no|down	yes|down	2
Cs_ont_5g047780	yes|down	no|up	yes|down	2
Cs_ont_5g047720	yes|down	no|up	yes|down	2
Cs_ont_5g047680	yes|down	no|up	yes|down	2
Cs_ont_5g047420	yes|down	no|up	yes|down	2
Cs_ont_5g043990	yes|down	no|up	yes|down	2
Cs_ont_5g043390	yes|down	no|down	yes|down	2
Cs_ont_5g041900	yes|down	no|up	yes|down	2
Cs_ont_5g041710	yes|down	no|up	yes|down	2
Cs_ont_5g040350	yes|down	no|down	yes|down	2
Cs_ont_5g039180	yes|down	no|up	yes|down	2
Cs_ont_5g030560	yes|down	no|up	yes|down	2
Cs_ont_5g029050	yes|down	no|down	yes|down	2
Cs_ont_5g027820	yes|down	no|up	yes|down	2
Cs_ont_5g027750	yes|down	no|down	yes|down	2
Cs_ont_5g026190	yes|down	no|down	yes|down	2
Cs_ont_5g024510	yes|down	no|down	yes|down	2
Cs_ont_5g024180	yes|down	no|up	yes|down	2
Cs_ont_5g019500	yes|down	no|down	yes|down	2
Cs_ont_5g016590	yes|down	no|down	yes|down	2
Cs_ont_5g016580	yes|down	no|up	yes|down	2
Cs_ont_5g015490	yes|down	no|down	yes|down	2
Cs_ont_5g015000	yes|down	no|up	yes|down	2
Cs_ont_5g014380	yes|down	no|up	yes|down	2
Cs_ont_5g014000	yes|down	no|up	yes|down	2
Cs_ont_5g013940	yes|down	no|up	yes|down	2
Cs_ont_5g011100	yes|down	no|up	yes|down	2
Cs_ont_5g009330	yes|down	no|up	yes|down	2
Cs_ont_5g008160	yes|down	no|down	yes|down	2
Cs_ont_5g007910	yes|down	no|up	yes|down	2
Cs_ont_5g007820	yes|down	no|up	yes|down	2
Cs_ont_5g006730	yes|down	no|down	yes|down	2
Cs_ont_5g006370	yes|down	no|up	yes|down	2
Cs_ont_5g005500	yes|down	no|down	yes|down	2
Cs_ont_5g005190	yes|down	no|down	yes|down	2
Cs_ont_5g004250	yes|down	no|up	yes|down	2
Cs_ont_5g003370	yes|down	no|down	yes|down	2
Cs_ont_5g003300	yes|down	no|down	yes|down	2
Cs_ont_5g003280	yes|down	no|down	yes|down	2
Cs_ont_4g027420	yes|down	no|down	yes|down	2
Cs_ont_4g027270	yes|down	no|up	yes|down	2
Cs_ont_4g026440	yes|down	no|up	yes|down	2
Cs_ont_4g026430	yes|down	no|up	yes|down	2
Cs_ont_4g026360	yes|down	no|up	yes|down	2
Cs_ont_4g026350	yes|down	no|up	yes|down	2
Cs_ont_4g026340	yes|down	no|up	yes|down	2
Cs_ont_4g025810	yes|down	no|down	yes|down	2
Cs_ont_4g024200	yes|down	no|down	yes|down	2
Cs_ont_4g022760	yes|down	no|up	yes|down	2
Cs_ont_4g022700	yes|down	no|up	yes|down	2
Cs_ont_4g022440	yes|down	no|up	yes|down	2
Cs_ont_4g020250	yes|down	no|up	yes|down	2
Cs_ont_4g020240	yes|down	no|up	yes|down	2
Cs_ont_4g020010	yes|down	no|down	yes|down	2
Cs_ont_4g018940	yes|down	no|up	yes|down	2
Cs_ont_4g017350	yes|down	no|down	yes|down	2
Cs_ont_4g017280	yes|down	no|up	yes|down	2
Cs_ont_4g015750	yes|down	no|up	yes|down	2
Cs_ont_4g013710	yes|down	no|down	yes|down	2
Cs_ont_4g012420	yes|down	no|up	yes|down	2
Cs_ont_4g006950	yes|down	no|down	yes|down	2
Cs_ont_4g006740	yes|down	no|up	yes|down	2
Cs_ont_4g005190	yes|down	no|up	yes|down	2
Cs_ont_4g004620	yes|down	no|down	yes|down	2
Cs_ont_4g002170	yes|down	no|down	yes|down	2
Cs_ont_4g001530	yes|down	no|up	yes|down	2
Cs_ont_4g000650	yes|down	no|down	yes|down	2
Cs_ont_3g033230	yes|down	no|up	yes|down	2
Cs_ont_3g029500	yes|down	no|up	yes|down	2
Cs_ont_3g027330	yes|down	no|up	yes|down	2
Cs_ont_3g027320	yes|down	no|up	yes|down	2
Cs_ont_3g022800	yes|down	no|down	yes|down	2
Cs_ont_3g021890	yes|down	no|up	yes|down	2
Cs_ont_3g020800	yes|down	no|down	yes|down	2
Cs_ont_3g020550	yes|down	no|down	yes|down	2
Cs_ont_3g017660	yes|down	no|down	yes|down	2
Cs_ont_3g016630	yes|down	no|down	yes|down	2
Cs_ont_3g016280	yes|down	no|up	yes|down	2
Cs_ont_3g016040	yes|down	no|down	yes|down	2
Cs_ont_3g014600	yes|down	no|down	yes|down	2
Cs_ont_3g014270	yes|down	no|down	yes|down	2
Cs_ont_3g013880	yes|down	no|down	yes|down	2
Cs_ont_3g012870	yes|down	no|up	yes|down	2
Cs_ont_3g010740	yes|down	no|up	yes|down	2
Cs_ont_3g007890	yes|down	no|up	yes|down	2
Cs_ont_3g006820	yes|down	no|up	yes|down	2
Cs_ont_3g006360	yes|down	no|up	yes|down	2
Cs_ont_3g004960	yes|down	no|down	yes|down	2
Cs_ont_3g004400	yes|down	no|down	yes|down	2
Cs_ont_3g004330	yes|down	no|down	yes|down	2
Cs_ont_3g002010	yes|down	no|down	yes|down	2
Cs_ont_3g001830	yes|down	no|up	yes|down	2
Cs_ont_3g001530	yes|down	no|down	yes|down	2
Cs_ont_2g031810	yes|down	no|down	yes|down	2
Cs_ont_2g031800	yes|down	no|down	yes|down	2
Cs_ont_2g030700	yes|down	no|down	yes|down	2
Cs_ont_2g029120	yes|down	no|down	yes|down	2
Cs_ont_2g028590	yes|down	no|down	yes|down	2
Cs_ont_2g024940	yes|down	no|up	yes|down	2
Cs_ont_2g024800	yes|down	no|down	yes|down	2
Cs_ont_2g023830	yes|down	no|up	yes|down	2
Cs_ont_2g018950	yes|down	no|up	yes|down	2
Cs_ont_2g014880	yes|down	no|up	yes|down	2
Cs_ont_2g014610	yes|down	no|up	yes|down	2
Cs_ont_2g014470	yes|down	no|down	yes|down	2
Cs_ont_2g013070	yes|down	no|up	yes|down	2
Cs_ont_2g008300	yes|down	no|down	yes|down	2
Cs_ont_2g006920	yes|down	no|up	yes|down	2
Cs_ont_2g006360	yes|down	no|up	yes|down	2
Cs_ont_2g005870	yes|down	no|up	yes|down	2
Cs_ont_2g005610	yes|down	no|down	yes|down	2
Cs_ont_2g004240	yes|down	no|up	yes|down	2
Cs_ont_2g003530	yes|down	no|up	yes|down	2
Cs_ont_2g002920	yes|down	no|down	yes|down	2
Cs_ont_2g000750	yes|down	no|down	yes|down	2
Cs_ont_1g029680	yes|down	no|up	yes|down	2
Cs_ont_1g028810	yes|down	no|down	yes|down	2
Cs_ont_1g027440	yes|down	no|down	yes|down	2
Cs_ont_1g026250	yes|down	no|down	yes|down	2
Cs_ont_1g025380	yes|down	no|up	yes|down	2
Cs_ont_1g024240	yes|down	no|up	yes|down	2
Cs_ont_1g021220	yes|down	no|down	yes|down	2
Cs_ont_1g020480	yes|down	no|down	yes|down	2
Cs_ont_1g020460	yes|down	no|down	yes|down	2
Cs_ont_1g020320	yes|down	no|down	yes|down	2
Cs_ont_1g020280	yes|down	no|down	yes|down	2
Cs_ont_1g019220	yes|down	no|down	yes|down	2
Cs_ont_1g019170	yes|down	no|up	yes|down	2
Cs_ont_1g017980	yes|down	no|down	yes|down	2
Cs_ont_1g015320	yes|down	no|down	yes|down	2
Cs_ont_1g011180	yes|down	no|up	yes|down	2
Cs_ont_1g001530	yes|down	no|down	yes|down	2
Cs_ont_9g006710	yes|up	yes|down	no|down	2
Cs_ont_7g029070	yes|up	yes|down	no|down	2
Cs_ont_5g049430	yes|up	yes|down	no|down	2
Cs_ont_4g009340	yes|up	yes|down	no|down	2
Cs_ont_4g005590	yes|up	yes|down	no|down	2
Cs_ont_2g034070	yes|up	yes|down	no|down	2
Cs_ont_8g028880	yes|up	yes|down	no|up	2
Cs_ont_8g024610	yes|up	yes|down	no|up	2
Cs_ont_6g008510	yes|up	yes|down	no|up	2
Cs_ont_5g007280	yes|up	yes|down	no|up	2
Cs_ont_5g005060	yes|up	yes|down	no|up	2
Cs_ont_4g012720	yes|up	yes|down	no|up	2
Cs_ont_4g003410	yes|up	yes|down	no|up	2
Cs_ont_4g003330	yes|up	yes|down	no|up	2
Cs_ont_1g007430	yes|up	yes|down	no|up	2
Cs_ont_Un004930	yes|up	no|up	yes|up	2
Cs_ont_Un000870	yes|up	no|up	yes|up	2
Cs_ont_9g028090	yes|up	no|down	yes|up	2
Cs_ont_9g028070	yes|up	no|up	yes|up	2
Cs_ont_9g027180	yes|up	no|down	yes|up	2
Cs_ont_9g026860	yes|up	no|down	yes|up	2
Cs_ont_9g025780	yes|up	no|up	yes|up	2
Cs_ont_9g023620	yes|up	no|up	yes|up	2
Cs_ont_9g021750	yes|up	no|up	yes|up	2
Cs_ont_9g016320	yes|up	no|up	yes|up	2
Cs_ont_9g014840	yes|up	no|up	yes|up	2
Cs_ont_9g014730	yes|up	no|up	yes|up	2
Cs_ont_9g005310	yes|up	no|up	yes|up	2
Cs_ont_9g004990	yes|up	no|up	yes|up	2
Cs_ont_9g004950	yes|up	no|up	yes|up	2
Cs_ont_9g004320	yes|up	no|up	yes|up	2
Cs_ont_9g003560	yes|up	no|up	yes|up	2
Cs_ont_8g028720	yes|up	no|up	yes|up	2
Cs_ont_8g027620	yes|up	no|up	yes|up	2
Cs_ont_8g027180	yes|up	no|up	yes|up	2
Cs_ont_8g025250	yes|up	no|up	yes|up	2
Cs_ont_8g025140	yes|up	no|down	yes|up	2
Cs_ont_8g024520	yes|up	no|down	yes|up	2
Cs_ont_8g020650	yes|up	no|down	yes|up	2
Cs_ont_8g020210	yes|up	no|down	yes|up	2
Cs_ont_8g016370	yes|up	no|up	yes|up	2
Cs_ont_8g015890	yes|up	no|up	yes|up	2
Cs_ont_8g014930	yes|up	no|up	yes|up	2
Cs_ont_8g014130	yes|up	no|down	yes|up	2
Cs_ont_8g014040	yes|up	no|up	yes|up	2
Cs_ont_8g010150	yes|up	no|up	yes|up	2
Cs_ont_8g007890	yes|up	no|down	yes|up	2
Cs_ont_8g007390	yes|up	no|down	yes|up	2
Cs_ont_8g006200	yes|up	no|up	yes|up	2
Cs_ont_8g006180	yes|up	no|up	yes|up	2
Cs_ont_8g005850	yes|up	no|up	yes|up	2
Cs_ont_8g005840	yes|up	no|up	yes|up	2
Cs_ont_8g005310	yes|up	no|up	yes|up	2
Cs_ont_8g001890	yes|up	no|up	yes|up	2
Cs_ont_8g001880	yes|up	no|down	yes|up	2
Cs_ont_8g001870	yes|up	no|up	yes|up	2
Cs_ont_8g001850	yes|up	no|down	yes|up	2
Cs_ont_8g001310	yes|up	no|down	yes|up	2
Cs_ont_8g001250	yes|up	no|down	yes|up	2
Cs_ont_8g001020	yes|up	no|down	yes|up	2
Cs_ont_7g029050	yes|up	no|up	yes|up	2
Cs_ont_7g028230	yes|up	no|up	yes|up	2
Cs_ont_7g027880	yes|up	no|down	yes|up	2
Cs_ont_7g026940	yes|up	no|up	yes|up	2
Cs_ont_7g022780	yes|up	no|down	yes|up	2
Cs_ont_7g022610	yes|up	no|up	yes|up	2
Cs_ont_7g022340	yes|up	no|up	yes|up	2
Cs_ont_7g021870	yes|up	no|down	yes|up	2
Cs_ont_7g020440	yes|up	no|up	yes|up	2
Cs_ont_7g020410	yes|up	no|up	yes|up	2
Cs_ont_7g018790	yes|up	no|up	yes|up	2
Cs_ont_7g017080	yes|up	no|down	yes|up	2
Cs_ont_7g016580	yes|up	no|up	yes|up	2
Cs_ont_7g016560	yes|up	no|up	yes|up	2
Cs_ont_7g015990	yes|up	no|up	yes|up	2
Cs_ont_7g015520	yes|up	no|up	yes|up	2
Cs_ont_7g014800	yes|up	no|up	yes|up	2
Cs_ont_7g014320	yes|up	no|down	yes|up	2
Cs_ont_7g013930	yes|up	no|down	yes|up	2
Cs_ont_7g013370	yes|up	no|up	yes|up	2
Cs_ont_7g012840	yes|up	no|up	yes|up	2
Cs_ont_7g011280	yes|up	no|up	yes|up	2
Cs_ont_7g010180	yes|up	no|up	yes|up	2
Cs_ont_7g010020	yes|up	no|up	yes|up	2
Cs_ont_7g006150	yes|up	no|up	yes|up	2
Cs_ont_7g006040	yes|up	no|up	yes|up	2
Cs_ont_7g004950	yes|up	no|down	yes|up	2
Cs_ont_7g004040	yes|up	no|up	yes|up	2
Cs_ont_7g003870	yes|up	no|down	yes|up	2
Cs_ont_7g000190	yes|up	no|up	yes|up	2
Cs_ont_6g025500	yes|up	no|up	yes|up	2
Cs_ont_6g018590	yes|up	no|up	yes|up	2
Cs_ont_6g016860	yes|up	no|up	yes|up	2
Cs_ont_6g016790	yes|up	no|down	yes|up	2
Cs_ont_6g016780	yes|up	no|up	yes|up	2
Cs_ont_6g015220	yes|up	no|up	yes|up	2
Cs_ont_6g015190	yes|up	no|no test	yes|up	2
Cs_ont_6g013930	yes|up	no|up	yes|up	2
Cs_ont_6g013400	yes|up	no|up	yes|up	2
Cs_ont_6g012380	yes|up	no|up	yes|up	2
Cs_ont_6g009920	yes|up	no|up	yes|up	2
Cs_ont_6g007640	yes|up	no|down	yes|up	2
Cs_ont_6g005420	yes|up	no|up	yes|up	2
Cs_ont_6g005260	yes|up	no|up	yes|up	2
Cs_ont_6g005170	yes|up	no|no test	yes|up	2
Cs_ont_6g004770	yes|up	no|up	yes|up	2
Cs_ont_6g002200	yes|up	no|up	yes|up	2
Cs_ont_6g001370	yes|up	no|up	yes|up	2
Cs_ont_6g001360	yes|up	no|up	yes|up	2
Cs_ont_5g049980	yes|up	no|up	yes|up	2
Cs_ont_5g049370	yes|up	no|down	yes|up	2
Cs_ont_5g048950	yes|up	no|up	yes|up	2
Cs_ont_5g046300	yes|up	no|down	yes|up	2
Cs_ont_5g045900	yes|up	no|down	yes|up	2
Cs_ont_5g045420	yes|up	no|down	yes|up	2
Cs_ont_5g044320	yes|up	no|up	yes|up	2
Cs_ont_5g043490	yes|up	no|down	yes|up	2
Cs_ont_5g042830	yes|up	no|down	yes|up	2
Cs_ont_5g041790	yes|up	no|up	yes|up	2
Cs_ont_5g040200	yes|up	no|up	yes|up	2
Cs_ont_5g038970	yes|up	no|down	yes|up	2
Cs_ont_5g036250	yes|up	no|up	yes|up	2
Cs_ont_5g035270	yes|up	no|up	yes|up	2
Cs_ont_5g034050	yes|up	no|up	yes|up	2
Cs_ont_5g033500	yes|up	no|up	yes|up	2
Cs_ont_5g032520	yes|up	no|up	yes|up	2
Cs_ont_5g029590	yes|up	no|up	yes|up	2
Cs_ont_5g029020	yes|up	no|down	yes|up	2
Cs_ont_5g028150	yes|up	no|up	yes|up	2
Cs_ont_5g028060	yes|up	no|up	yes|up	2
Cs_ont_5g028030	yes|up	no|up	yes|up	2
Cs_ont_5g027970	yes|up	no|up	yes|up	2
Cs_ont_5g023300	yes|up	no|up	yes|up	2
Cs_ont_5g021090	yes|up	no|up	yes|up	2
Cs_ont_5g018270	yes|up	no|down	yes|up	2
Cs_ont_5g017050	yes|up	no|up	yes|up	2
Cs_ont_5g016710	yes|up	no|down	yes|up	2
Cs_ont_5g016550	yes|up	no|up	yes|up	2
Cs_ont_5g015520	yes|up	no|up	yes|up	2
Cs_ont_5g015510	yes|up	no|up	yes|up	2
Cs_ont_5g014870	yes|up	no|up	yes|up	2
Cs_ont_5g013240	yes|up	no|up	yes|up	2
Cs_ont_5g012990	yes|up	no|up	yes|up	2
Cs_ont_5g012750	yes|up	no|up	yes|up	2
Cs_ont_5g012510	yes|up	no|down	yes|up	2
Cs_ont_5g007840	yes|up	no|up	yes|up	2
Cs_ont_5g007630	yes|up	no|up	yes|up	2
Cs_ont_5g007120	yes|up	no|down	yes|up	2
Cs_ont_5g004670	yes|up	no|down	yes|up	2
Cs_ont_5g004130	yes|up	no|up	yes|up	2
Cs_ont_5g003620	yes|up	no|down	yes|up	2
Cs_ont_5g003070	yes|up	no|down	yes|up	2
Cs_ont_5g002210	yes|up	no|down	yes|up	2
Cs_ont_5g001750	yes|up	no|down	yes|up	2
Cs_ont_5g001740	yes|up	no|up	yes|up	2
Cs_ont_5g001720	yes|up	no|up	yes|up	2
Cs_ont_5g000210	yes|up	no|up	yes|up	2
Cs_ont_4g028380	yes|up	no|down	yes|up	2
Cs_ont_4g028220	yes|up	no|up	yes|up	2
Cs_ont_4g026530	yes|up	no|up	yes|up	2
Cs_ont_4g025970	yes|up	no|down	yes|up	2
Cs_ont_4g025310	yes|up	no|up	yes|up	2
Cs_ont_4g023170	yes|up	no|down	yes|up	2
Cs_ont_4g023130	yes|up	no|down	yes|up	2
Cs_ont_4g022770	yes|up	no|down	yes|up	2
Cs_ont_4g022690	yes|up	no|down	yes|up	2
Cs_ont_4g022220	yes|up	no|down	yes|up	2
Cs_ont_4g020400	yes|up	no|up	yes|up	2
Cs_ont_4g016690	yes|up	no|up	yes|up	2
Cs_ont_4g016600	yes|up	no|up	yes|up	2
Cs_ont_4g016480	yes|up	no|up	yes|up	2
Cs_ont_4g015610	yes|up	no|down	yes|up	2
Cs_ont_4g014370	yes|up	no|down	yes|up	2
Cs_ont_4g010640	yes|up	no|up	yes|up	2
Cs_ont_4g009390	yes|up	no|up	yes|up	2
Cs_ont_4g006620	yes|up	no|up	yes|up	2
Cs_ont_4g002280	yes|up	no|up	yes|up	2
Cs_ont_3g033200	yes|up	no|up	yes|up	2
Cs_ont_3g033170	yes|up	no|up	yes|up	2
Cs_ont_3g032970	yes|up	no|up	yes|up	2
Cs_ont_3g032860	yes|up	no|down	yes|up	2
Cs_ont_3g031280	yes|up	no|up	yes|up	2
Cs_ont_3g027820	yes|up	no|down	yes|up	2
Cs_ont_3g024460	yes|up	no|up	yes|up	2
Cs_ont_3g021860	yes|up	no|up	yes|up	2
Cs_ont_3g019520	yes|up	no|up	yes|up	2
Cs_ont_3g019070	yes|up	no|up	yes|up	2
Cs_ont_3g014850	yes|up	no|down	yes|up	2
Cs_ont_3g012380	yes|up	no|down	yes|up	2
Cs_ont_3g011990	yes|up	no|up	yes|up	2
Cs_ont_3g011290	yes|up	no|up	yes|up	2
Cs_ont_3g010480	yes|up	no|up	yes|up	2
Cs_ont_3g009940	yes|up	no|up	yes|up	2
Cs_ont_3g009300	yes|up	no|up	yes|up	2
Cs_ont_3g009180	yes|up	no|up	yes|up	2
Cs_ont_3g006800	yes|up	no|up	yes|up	2
Cs_ont_3g006350	yes|up	no|up	yes|up	2
Cs_ont_3g005550	yes|up	no|up	yes|up	2
Cs_ont_3g003800	yes|up	no|down	yes|up	2
Cs_ont_3g002530	yes|up	no|up	yes|up	2
Cs_ont_3g002510	yes|up	no|down	yes|up	2
Cs_ont_3g001590	yes|up	no|up	yes|up	2
Cs_ont_3g000890	yes|up	no|down	yes|up	2
Cs_ont_2g035090	yes|up	no|up	yes|up	2
Cs_ont_2g035040	yes|up	no|up	yes|up	2
Cs_ont_2g035030	yes|up	no|up	yes|up	2
Cs_ont_2g034410	yes|up	no|up	yes|up	2
Cs_ont_2g033760	yes|up	no|up	yes|up	2
Cs_ont_2g031580	yes|up	no|up	yes|up	2
Cs_ont_2g031330	yes|up	no|down	yes|up	2
Cs_ont_2g030250	yes|up	no|up	yes|up	2
Cs_ont_2g029680	yes|up	no|up	yes|up	2
Cs_ont_2g022750	yes|up	no|down	yes|up	2
Cs_ont_2g022380	yes|up	no|up	yes|up	2
Cs_ont_2g021750	yes|up	no|up	yes|up	2
Cs_ont_2g020700	yes|up	no|down	yes|up	2
Cs_ont_2g019240	yes|up	no|up	yes|up	2
Cs_ont_2g016590	yes|up	no|up	yes|up	2
Cs_ont_2g014090	yes|up	no|up	yes|up	2
Cs_ont_2g013350	yes|up	no|down	yes|up	2
Cs_ont_2g011240	yes|up	no|up	yes|up	2
Cs_ont_2g010590	yes|up	no|down	yes|up	2
Cs_ont_2g009600	yes|up	no|up	yes|up	2
Cs_ont_2g009410	yes|up	no|up	yes|up	2
Cs_ont_2g008890	yes|up	no|down	yes|up	2
Cs_ont_2g008810	yes|up	no|up	yes|up	2
Cs_ont_2g008040	yes|up	no|up	yes|up	2
Cs_ont_2g008000	yes|up	no|up	yes|up	2
Cs_ont_2g007510	yes|up	no|down	yes|up	2
Cs_ont_2g003890	yes|up	no|up	yes|up	2
Cs_ont_2g002990	yes|up	no|down	yes|up	2
Cs_ont_2g002390	yes|up	no|down	yes|up	2
Cs_ont_2g001140	yes|up	no|up	yes|up	2
Cs_ont_1g028480	yes|up	no|up	yes|up	2
Cs_ont_1g026450	yes|up	no|no test	yes|up	2
Cs_ont_1g024820	yes|up	no|down	yes|up	2
Cs_ont_1g024450	yes|up	no|up	yes|up	2
Cs_ont_1g024390	yes|up	no|up	yes|up	2
Cs_ont_1g024260	yes|up	no|up	yes|up	2
Cs_ont_1g021480	yes|up	no|up	yes|up	2
Cs_ont_1g021320	yes|up	no|down	yes|up	2
Cs_ont_1g020890	yes|up	no|up	yes|up	2
Cs_ont_1g019970	yes|up	no|up	yes|up	2
Cs_ont_1g018560	yes|up	no|down	yes|up	2
Cs_ont_1g018550	yes|up	no|down	yes|up	2
Cs_ont_1g018510	yes|up	no|up	yes|up	2
Cs_ont_1g017870	yes|up	no|down	yes|up	2
Cs_ont_1g017600	yes|up	no|up	yes|up	2
Cs_ont_1g016830	yes|up	no|down	yes|up	2
Cs_ont_1g015270	yes|up	no|up	yes|up	2
Cs_ont_1g015060	yes|up	no|up	yes|up	2
Cs_ont_1g014990	yes|up	no|up	yes|up	2
Cs_ont_1g013900	yes|up	no|up	yes|up	2
Cs_ont_1g013800	yes|up	no|up	yes|up	2
Cs_ont_1g013080	yes|up	no|up	yes|up	2
Cs_ont_1g009820	yes|up	no|up	yes|up	2
Cs_ont_1g009760	yes|up	no|down	yes|up	2
Cs_ont_1g007050	yes|up	no|down	yes|up	2
Cs_ont_1g006760	yes|up	no|up	yes|up	2
Cs_ont_1g003730	yes|up	no|down	yes|up	2
Cs_ont_1g003240	yes|up	no|up	yes|up	2
Cs_ont_1g003160	yes|up	no|down	yes|up	2
Cs_ont_1g001580	yes|up	no|up	yes|up	2
Cs_ont_1g001120	yes|up	no|up	yes|up	2
Cs_ont_1g000160	yes|up	no|up	yes|up	2
Cs_ont_1g000140	yes|up	no|up	yes|up	2
Cs_ont_1g000110	yes|up	no|up	yes|up	2
Cs_ont_9g010830	no|down	yes|up	no|up	1
Cs_ont_9g010800	no|down	yes|up	no|up	1
Cs_ont_8g022930	no|down	yes|up	no|up	1
Cs_ont_8g001590	no|down	yes|up	no|up	1
Cs_ont_8g000640	no|down	yes|up	no|up	1
Cs_ont_7g014650	no|down	yes|up	no|up	1
Cs_ont_7g011580	no|down	yes|up	no|up	1
Cs_ont_7g003890	no|down	yes|up	no|up	1
Cs_ont_6g018880	no|down	yes|up	no|up	1
Cs_ont_6g017960	no|down	yes|up	no|up	1
Cs_ont_5g024310	no|down	yes|up	no|up	1
Cs_ont_5g013300	no|down	yes|up	no|up	1
Cs_ont_5g005530	no|down	yes|up	no|up	1
Cs_ont_4g026380	no|down	yes|up	no|up	1
Cs_ont_4g026040	no|down	yes|up	no|up	1
Cs_ont_4g024260	no|down	yes|up	no|up	1
Cs_ont_4g017030	no|down	yes|up	no|up	1
Cs_ont_4g007010	no|down	yes|up	no|up	1
Cs_ont_3g022180	no|down	yes|up	no|up	1
Cs_ont_3g021920	no|down	yes|up	no|up	1
Cs_ont_3g012550	no|down	yes|up	no|up	1
Cs_ont_3g001020	no|down	yes|up	no|up	1
Cs_ont_2g034210	no|down	yes|up	no|up	1
Cs_ont_2g028550	no|down	yes|up	no|up	1
Cs_ont_2g025370	no|down	yes|up	no|up	1
Cs_ont_2g011280	no|down	yes|up	no|up	1
Cs_ont_2g007790	no|down	yes|up	no|up	1
Cs_ont_2g006890	no|down	yes|up	no|up	1
Cs_ont_2g003950	no|down	yes|up	no|up	1
Cs_ont_2g001750	no|down	yes|up	no|up	1
Cs_ont_1g027520	no|down	yes|up	no|up	1
Cs_ont_1g026160	no|down	yes|up	no|up	1
Cs_ont_1g004610	no|down	yes|up	no|up	1
Cs_ont_1g002510	no|down	yes|up	no|up	1
Cs_ont_Un000170	no|down	no|down	yes|down	1
Cs_ont_Un000120	no|down	no|down	yes|down	1
Cs_ont_9g028660	no|down	no|down	yes|down	1
Cs_ont_9g024600	no|down	no|down	yes|down	1
Cs_ont_9g019270	no|down	no|down	yes|down	1
Cs_ont_9g013280	no|down	no|down	yes|down	1
Cs_ont_9g011490	no|down	no|down	yes|down	1
Cs_ont_9g005610	no|down	no|down	yes|down	1
Cs_ont_9g005300	no|down	no|down	yes|down	1
Cs_ont_9g004580	no|down	no|down	yes|down	1
Cs_ont_9g003330	no|down	no|down	yes|down	1
Cs_ont_9g002520	no|down	no|down	yes|down	1
Cs_ont_9g001700	no|down	no|down	yes|down	1
Cs_ont_9g000400	no|down	no|down	yes|down	1
Cs_ont_8g028220	no|down	no|down	yes|down	1
Cs_ont_8g027860	no|down	no|down	yes|down	1
Cs_ont_8g025370	no|down	no|down	yes|down	1
Cs_ont_8g025030	no|down	no|down	yes|down	1
Cs_ont_8g022540	no|down	no|down	yes|down	1
Cs_ont_8g022290	no|down	no|down	yes|down	1
Cs_ont_8g019910	no|down	no|down	yes|down	1
Cs_ont_8g019560	no|down	no|down	yes|down	1
Cs_ont_8g019500	no|down	no|down	yes|down	1
Cs_ont_8g014980	no|down	no|up	yes|down	1
Cs_ont_8g014900	no|down	no|down	yes|down	1
Cs_ont_8g007220	no|down	no|down	yes|down	1
Cs_ont_8g003290	no|down	no|down	yes|down	1
Cs_ont_8g002310	no|down	no|down	yes|down	1
Cs_ont_8g000970	no|down	no|up	yes|down	1
Cs_ont_7g027980	no|down	no|down	yes|down	1
Cs_ont_7g026480	no|down	no|down	yes|down	1
Cs_ont_7g024310	no|down	no|down	yes|down	1
Cs_ont_7g023260	no|down	no|down	yes|down	1
Cs_ont_7g023210	no|down	no|down	yes|down	1
Cs_ont_7g017960	no|down	no|down	yes|down	1
Cs_ont_7g015750	no|down	no|down	yes|down	1
Cs_ont_7g014810	no|down	no|down	yes|down	1
Cs_ont_7g014580	no|down	no|down	yes|down	1
Cs_ont_7g012620	no|down	no|down	yes|down	1
Cs_ont_7g009610	no|down	no|down	yes|down	1
Cs_ont_7g006210	no|down	no|down	yes|down	1
Cs_ont_7g005550	no|down	no|down	yes|down	1
Cs_ont_7g004090	no|down	no|down	yes|down	1
Cs_ont_7g003610	no|down	no|down	yes|down	1
Cs_ont_7g003430	no|down	no|down	yes|down	1
Cs_ont_7g001480	no|down	no|down	yes|down	1
Cs_ont_7g001470	no|down	no|down	yes|down	1
Cs_ont_7g000600	no|down	no|down	yes|down	1
Cs_ont_6g022750	no|down	no|down	yes|down	1
Cs_ont_6g022210	no|down	no|down	yes|down	1
Cs_ont_6g022170	no|down	no|down	yes|down	1
Cs_ont_6g020250	no|down	no|down	yes|down	1
Cs_ont_6g015770	no|down	no|down	yes|down	1
Cs_ont_6g014030	no|down	no|down	yes|down	1
Cs_ont_6g009080	no|down	no|down	yes|down	1
Cs_ont_6g006970	no|down	no|down	yes|down	1
Cs_ont_6g006770	no|down	no|down	yes|down	1
Cs_ont_6g004680	no|down	no|down	yes|down	1
Cs_ont_6g004070	no|down	no|down	yes|down	1
Cs_ont_6g003950	no|down	no|down	yes|down	1
Cs_ont_6g003410	no|down	no|down	yes|down	1
Cs_ont_6g001870	no|down	no|down	yes|down	1
Cs_ont_5g050540	no|down	no|down	yes|down	1
Cs_ont_5g047650	no|down	no|down	yes|down	1
Cs_ont_5g046110	no|down	no|down	yes|down	1
Cs_ont_5g044630	no|down	no|down	yes|down	1
Cs_ont_5g040850	no|down	no|down	yes|down	1
Cs_ont_5g040240	no|down	no|down	yes|down	1
Cs_ont_5g038740	no|down	no|down	yes|down	1
Cs_ont_5g035620	no|down	no|down	yes|down	1
Cs_ont_5g031730	no|down	no|down	yes|down	1
Cs_ont_5g030630	no|down	no|down	yes|down	1
Cs_ont_5g030400	no|down	no|down	yes|down	1
Cs_ont_5g030390	no|down	no|down	yes|down	1
Cs_ont_5g020610	no|down	no|down	yes|down	1
Cs_ont_5g020110	no|down	no|down	yes|down	1
Cs_ont_5g017950	no|down	no|down	yes|down	1
Cs_ont_5g016530	no|down	no|down	yes|down	1
Cs_ont_5g015220	no|down	no|down	yes|down	1
Cs_ont_5g012730	no|down	no|down	yes|down	1
Cs_ont_5g012720	no|down	no|down	yes|down	1
Cs_ont_5g010570	no|down	no|down	yes|down	1
Cs_ont_5g007780	no|down	no|down	yes|down	1
Cs_ont_5g006540	no|down	no|down	yes|down	1
Cs_ont_5g005930	no|down	no|down	yes|down	1
Cs_ont_5g004150	no|down	no|down	yes|down	1
Cs_ont_5g003400	no|down	no|down	yes|down	1
Cs_ont_5g003290	no|down	no|down	yes|down	1
Cs_ont_4g026490	no|down	no|down	yes|down	1
Cs_ont_4g026210	no|down	no|down	yes|down	1
Cs_ont_4g025190	no|down	no|down	yes|down	1
Cs_ont_4g022550	no|down	no|down	yes|down	1
Cs_ont_4g019480	no|down	no|down	yes|down	1
Cs_ont_4g019360	no|down	no|down	yes|down	1
Cs_ont_4g019220	no|down	no|down	yes|down	1
Cs_ont_4g016540	no|down	no|down	yes|down	1
Cs_ont_4g016470	no|down	no|down	yes|down	1
Cs_ont_4g015480	no|down	no|down	yes|down	1
Cs_ont_4g014270	no|down	no|down	yes|down	1
Cs_ont_4g013960	no|down	no|down	yes|down	1
Cs_ont_4g011660	no|down	no|down	yes|down	1
Cs_ont_4g009690	no|down	no|down	yes|down	1
Cs_ont_4g009150	no|down	no|down	yes|down	1
Cs_ont_4g004930	no|down	no|down	yes|down	1
Cs_ont_4g002310	no|down	no|down	yes|down	1
Cs_ont_4g002220	no|down	no|down	yes|down	1
Cs_ont_4g001640	no|down	no|down	yes|down	1
Cs_ont_4g000090	no|down	no|down	yes|down	1
Cs_ont_3g033090	no|down	no|down	yes|down	1
Cs_ont_3g032510	no|down	no|down	yes|down	1
Cs_ont_3g031610	no|down	no|down	yes|down	1
Cs_ont_3g030070	no|down	no|down	yes|down	1
Cs_ont_3g027280	no|down	no|down	yes|down	1
Cs_ont_3g026440	no|down	no|up	yes|down	1
Cs_ont_3g015170	no|down	no|down	yes|down	1
Cs_ont_3g010970	no|down	no|down	yes|down	1
Cs_ont_3g010210	no|down	no|down	yes|down	1
Cs_ont_3g008990	no|down	no|down	yes|down	1
Cs_ont_3g007490	no|down	no|down	yes|down	1
Cs_ont_3g006740	no|down	no|down	yes|down	1
Cs_ont_3g004390	no|down	no|down	yes|down	1
Cs_ont_3g003360	no|down	no|down	yes|down	1
Cs_ont_3g003070	no|down	no|down	yes|down	1
Cs_ont_3g002000	no|down	no|down	yes|down	1
Cs_ont_3g000500	no|down	no|down	yes|down	1
Cs_ont_2g034310	no|down	no|down	yes|down	1
Cs_ont_2g028070	no|down	no|down	yes|down	1
Cs_ont_2g018800	no|down	no|down	yes|down	1
Cs_ont_2g017540	no|down	no|down	yes|down	1
Cs_ont_2g017180	no|down	no|down	yes|down	1
Cs_ont_2g016620	no|down	no|down	yes|down	1
Cs_ont_2g014210	no|down	no|down	yes|down	1
Cs_ont_2g014200	no|down	no|down	yes|down	1
Cs_ont_2g012630	no|down	no|down	yes|down	1
Cs_ont_2g009980	no|down	no|down	yes|down	1
Cs_ont_2g002740	no|down	no|down	yes|down	1
Cs_ont_2g001800	no|down	no|down	yes|down	1
Cs_ont_2g001790	no|down	no|down	yes|down	1
Cs_ont_2g001660	no|down	no|down	yes|down	1
Cs_ont_2g000180	no|down	no|down	yes|down	1
Cs_ont_1g027780	no|down	no|down	yes|down	1
Cs_ont_1g023810	no|down	no|down	yes|down	1
Cs_ont_1g023480	no|down	no|down	yes|down	1
Cs_ont_1g019670	no|down	no|down	yes|down	1
Cs_ont_1g015820	no|down	no|down	yes|down	1
Cs_ont_1g015010	no|down	no|down	yes|down	1
Cs_ont_1g014680	no|down	no|down	yes|down	1
Cs_ont_1g011550	no|down	no|down	yes|down	1
Cs_ont_1g008520	no|down	no|down	yes|down	1
Cs_ont_1g006970	no|down	no|down	yes|down	1
Cs_ont_1g004680	no|down	no|down	yes|down	1
Cs_ont_1g002240	no|down	no|down	yes|down	1
Cs_ont_8g004740	no|down	no|up	yes|up	1
Cs_ont_4g019130	no|down	no|up	yes|up	1
Cs_ont_2g034200	no|down	no|up	yes|up	1
Cs_ont_2g029140	no|down	no|up	yes|up	1
Cs_ont_1g002520	no|down	no|up	yes|up	1
Cs_ont_9g017220	no|up	yes|down	no|down	1
Cs_ont_9g014140	no|up	yes|down	no|down	1
Cs_ont_6g017900	no|up	yes|down	no|down	1
Cs_ont_6g014950	no|up	yes|down	no|down	1
Cs_ont_5g047760	no|up	yes|down	no|down	1
Cs_ont_5g043230	no|up	yes|down	no|down	1
Cs_ont_5g040410	no|up	yes|down	no|down	1
Cs_ont_5g011080	no|up	yes|down	no|down	1
Cs_ont_5g006850	no|up	yes|down	no|down	1
Cs_ont_3g016120	no|up	yes|down	no|down	1
Cs_ont_3g009610	no|up	yes|down	no|down	1
Cs_ont_3g003340	no|up	yes|down	no|down	1
Cs_ont_2g001220	no|up	yes|down	no|down	1
Cs_ont_6g005150	no|up	no|down	yes|down	1
Cs_ont_9g027480	no|up	no|up	yes|up	1
Cs_ont_9g027380	no|up	no|up	yes|up	1
Cs_ont_9g025810	no|up	no|up	yes|up	1
Cs_ont_9g025030	no|up	no|up	yes|up	1
Cs_ont_9g024110	no|up	no|up	yes|up	1
Cs_ont_9g022440	no|up	no|up	yes|up	1
Cs_ont_9g020430	no|up	no|up	yes|up	1
Cs_ont_9g019350	no|up	no|up	yes|up	1
Cs_ont_9g017330	no|up	no|up	yes|up	1
Cs_ont_9g014710	no|up	no|up	yes|up	1
Cs_ont_9g010930	no|up	no|up	yes|up	1
Cs_ont_9g010880	no|up	no|up	yes|up	1
Cs_ont_9g010700	no|up	no|up	yes|up	1
Cs_ont_9g010190	no|up	no|up	yes|up	1
Cs_ont_9g009440	no|up	no|up	yes|up	1
Cs_ont_9g009170	no|up	no|up	yes|up	1
Cs_ont_9g003710	no|up	no|up	yes|up	1
Cs_ont_9g000770	no|up	no|up	yes|up	1
Cs_ont_8g027240	no|up	no|up	yes|up	1
Cs_ont_8g026850	no|up	no|up	yes|up	1
Cs_ont_8g018970	no|up	no|up	yes|up	1
Cs_ont_8g018720	no|up	no|up	yes|up	1
Cs_ont_8g015830	no|up	no|up	yes|up	1
Cs_ont_8g011410	no|up	no|up	yes|up	1
Cs_ont_8g010940	no|up	no|up	yes|up	1
Cs_ont_8g010750	no|up	no|up	yes|up	1
Cs_ont_8g007580	no|up	no|up	yes|up	1
Cs_ont_8g005690	no|up	no|up	yes|up	1
Cs_ont_8g004040	no|up	no|up	yes|up	1
Cs_ont_8g002730	no|up	no|up	yes|up	1
Cs_ont_8g001440	no|up	no|up	yes|up	1
Cs_ont_8g000880	no|up	no|up	yes|up	1
Cs_ont_8g000470	no|up	no|up	yes|up	1
Cs_ont_7g025620	no|up	no|up	yes|up	1
Cs_ont_7g025290	no|up	no|up	yes|up	1
Cs_ont_7g024170	no|up	no|up	yes|up	1
Cs_ont_7g023930	no|up	no|up	yes|up	1
Cs_ont_7g023170	no|up	no|up	yes|up	1
Cs_ont_7g022650	no|up	no|up	yes|up	1
Cs_ont_7g020400	no|up	no|up	yes|up	1
Cs_ont_7g020290	no|up	no|up	yes|up	1
Cs_ont_7g020220	no|up	no|up	yes|up	1
Cs_ont_7g019130	no|up	no|up	yes|up	1
Cs_ont_7g018840	no|up	no|up	yes|up	1
Cs_ont_7g017510	no|up	no|up	yes|up	1
Cs_ont_7g016120	no|up	no|up	yes|up	1
Cs_ont_7g015480	no|up	no|up	yes|up	1
Cs_ont_7g014820	no|up	no|up	yes|up	1
Cs_ont_7g014520	no|up	no|up	yes|up	1
Cs_ont_7g014330	no|up	no|up	yes|up	1
Cs_ont_7g012140	no|up	no|up	yes|up	1
Cs_ont_7g011500	no|up	no|up	yes|up	1
Cs_ont_7g011480	no|up	no|up	yes|up	1
Cs_ont_7g010080	no|up	no|up	yes|up	1
Cs_ont_7g007140	no|up	no|up	yes|up	1
Cs_ont_7g006400	no|up	no|up	yes|up	1
Cs_ont_7g006000	no|up	no|up	yes|up	1
Cs_ont_7g005840	no|up	no|up	yes|up	1
Cs_ont_7g004310	no|up	no|up	yes|up	1
Cs_ont_7g002680	no|up	no|up	yes|up	1
Cs_ont_7g002010	no|up	no|up	yes|up	1
Cs_ont_7g001360	no|up	no|up	yes|up	1
Cs_ont_6g024600	no|up	no|up	yes|up	1
Cs_ont_6g023840	no|up	no|up	yes|up	1
Cs_ont_6g023800	no|up	no|up	yes|up	1
Cs_ont_6g023120	no|up	no|up	yes|up	1
Cs_ont_6g016620	no|up	no|up	yes|up	1
Cs_ont_6g012320	no|up	no|up	yes|up	1
Cs_ont_6g006810	no|up	no|up	yes|up	1
Cs_ont_6g006790	no|up	no|up	yes|up	1
Cs_ont_6g006550	no|up	no|up	yes|up	1
Cs_ont_6g005530	no|up	no|up	yes|up	1
Cs_ont_6g005160	no|up	no|up	yes|up	1
Cs_ont_6g003480	no|up	no|up	yes|up	1
Cs_ont_6g002930	no|up	no|up	yes|up	1
Cs_ont_6g000560	no|up	no|up	yes|up	1
Cs_ont_5g048570	no|up	no|up	yes|up	1
Cs_ont_5g044160	no|up	no|up	yes|up	1
Cs_ont_5g044090	no|up	no|up	yes|up	1
Cs_ont_5g043040	no|up	no|up	yes|up	1
Cs_ont_5g042390	no|up	no|up	yes|up	1
Cs_ont_5g041010	no|up	no|up	yes|up	1
Cs_ont_5g037680	no|up	no|up	yes|up	1
Cs_ont_5g034510	no|up	no|up	yes|up	1
Cs_ont_5g023110	no|up	no|up	yes|up	1
Cs_ont_5g016560	no|up	no|up	yes|up	1
Cs_ont_5g015730	no|up	no|up	yes|up	1
Cs_ont_5g013330	no|up	no|up	yes|up	1
Cs_ont_5g008520	no|up	no|up	yes|up	1
Cs_ont_5g006290	no|up	no|up	yes|up	1
Cs_ont_5g006030	no|up	no|up	yes|up	1
Cs_ont_5g006020	no|up	no|up	yes|up	1
Cs_ont_5g002780	no|up	no|up	yes|up	1
Cs_ont_5g002640	no|up	no|up	yes|up	1
Cs_ont_4g028450	no|up	no|up	yes|up	1
Cs_ont_4g027290	no|up	no|up	yes|up	1
Cs_ont_4g025830	no|up	no|up	yes|up	1
Cs_ont_4g022880	no|up	no|up	yes|up	1
Cs_ont_4g022110	no|up	no|up	yes|up	1
Cs_ont_4g018700	no|up	no|up	yes|up	1
Cs_ont_4g016890	no|up	no|up	yes|up	1
Cs_ont_4g016840	no|up	no|up	yes|up	1
Cs_ont_4g014420	no|up	no|up	yes|up	1
Cs_ont_4g014000	no|up	no|up	yes|up	1
Cs_ont_4g008940	no|up	no|up	yes|up	1
Cs_ont_4g008350	no|up	no|up	yes|up	1
Cs_ont_4g008220	no|up	no|up	yes|up	1
Cs_ont_4g005440	no|up	no|up	yes|up	1
Cs_ont_4g004260	no|up	no|up	yes|up	1
Cs_ont_4g003840	no|up	no|up	yes|up	1
Cs_ont_4g001230	no|up	no|up	yes|up	1
Cs_ont_3g032920	no|up	no|up	yes|up	1
Cs_ont_3g031000	no|up	no|up	yes|up	1
Cs_ont_3g027870	no|up	no|up	yes|up	1
Cs_ont_3g025120	no|up	no|up	yes|up	1
Cs_ont_3g024840	no|up	no|up	yes|up	1
Cs_ont_3g023980	no|up	no|up	yes|up	1
Cs_ont_3g019530	no|up	no|up	yes|up	1
Cs_ont_3g019460	no|up	no|up	yes|up	1
Cs_ont_3g019110	no|up	no|up	yes|up	1
Cs_ont_3g016900	no|up	no|up	yes|up	1
Cs_ont_3g016380	no|up	no|up	yes|up	1
Cs_ont_3g012970	no|up	no|up	yes|up	1
Cs_ont_3g010590	no|up	no|up	yes|up	1
Cs_ont_3g009580	no|up	no|up	yes|up	1
Cs_ont_3g009170	no|up	no|up	yes|up	1
Cs_ont_3g005590	no|up	no|up	yes|up	1
Cs_ont_3g004950	no|up	no|up	yes|up	1
Cs_ont_3g003310	no|up	no|up	yes|up	1
Cs_ont_3g002500	no|up	no|up	yes|up	1
Cs_ont_3g001870	no|up	no|up	yes|up	1
Cs_ont_3g001400	no|up	no|up	yes|up	1
Cs_ont_2g034500	no|up	no|up	yes|up	1
Cs_ont_2g032290	no|up	no|up	yes|up	1
Cs_ont_2g031540	no|up	no|up	yes|up	1
Cs_ont_2g029970	no|up	no|up	yes|up	1
Cs_ont_2g029700	no|up	no|up	yes|up	1
Cs_ont_2g027280	no|up	no|up	yes|up	1
Cs_ont_2g026560	no|up	no|up	yes|up	1
Cs_ont_2g026020	no|up	no|up	yes|up	1
Cs_ont_2g023020	no|up	no|up	yes|up	1
Cs_ont_2g020690	no|up	no|up	yes|up	1
Cs_ont_2g020160	no|up	no|up	yes|up	1
Cs_ont_2g016170	no|up	no|up	yes|up	1
Cs_ont_2g015450	no|up	no|up	yes|up	1
Cs_ont_2g014170	no|up	no|up	yes|up	1
Cs_ont_2g012490	no|up	no|up	yes|up	1
Cs_ont_2g010780	no|up	no|up	yes|up	1
Cs_ont_2g010520	no|up	no|up	yes|up	1
Cs_ont_2g010310	no|up	no|up	yes|up	1
Cs_ont_2g006100	no|up	no|up	yes|up	1
Cs_ont_2g005270	no|up	no|up	yes|up	1
Cs_ont_2g004040	no|up	no|up	yes|up	1
Cs_ont_2g001850	no|up	no|up	yes|up	1
Cs_ont_2g001740	no|up	no|up	yes|up	1
Cs_ont_2g000770	no|up	no|up	yes|up	1
Cs_ont_1g028510	no|up	no|up	yes|up	1
Cs_ont_1g028230	no|up	no|up	yes|up	1
Cs_ont_1g026880	no|up	no|up	yes|up	1
Cs_ont_1g026230	no|up	no|up	yes|up	1
Cs_ont_1g023010	no|up	no|up	yes|up	1
Cs_ont_1g018570	no|up	no|up	yes|up	1
Cs_ont_1g015200	no|up	no|up	yes|up	1
Cs_ont_1g009750	no|up	no|up	yes|up	1
Cs_ont_1g005560	no|up	no|up	yes|up	1
Cs_ont_1g005420	no|up	no|up	yes|up	1
Cs_ont_1g005380	no|up	no|up	yes|up	1
Cs_ont_1g005130	no|up	no|up	yes|up	1
Cs_ont_1g004600	no|up	no|up	yes|up	1
Cs_ont_1g003410	no|up	no|up	yes|up	1
Cs_ont_1g002630	no|up	no|up	yes|up	1
Cs_ont_1g002190	no|up	no|up	yes|up	1
Cs_ont_1g000790	no|up	no|up	yes|up	1
Cs_ont_Un005300	yes|down	no|up	no|down	1
Cs_ont_9g027760	yes|down	no|up	no|down	1
Cs_ont_9g026440	yes|down	no|up	no|down	1
Cs_ont_9g024860	yes|down	no|up	no|down	1
Cs_ont_9g023820	yes|down	no|up	no|down	1
Cs_ont_9g023730	yes|down	no|up	no|down	1
Cs_ont_9g022460	yes|down	no|up	no|down	1
Cs_ont_9g020890	yes|down	no|up	no|down	1
Cs_ont_9g020220	yes|down	no|up	no|down	1
Cs_ont_9g013950	yes|down	no|up	no|down	1
Cs_ont_9g012970	yes|down	no|up	no|down	1
Cs_ont_9g012610	yes|down	no|down	no|down	1
Cs_ont_9g010790	yes|down	no|up	no|down	1
Cs_ont_9g010770	yes|down	no|up	no|down	1
Cs_ont_9g010210	yes|down	no|up	no|down	1
Cs_ont_9g008250	yes|down	no|up	no|down	1
Cs_ont_9g007680	yes|down	no|up	no|down	1
Cs_ont_9g007060	yes|down	no|up	no|down	1
Cs_ont_9g006530	yes|down	no|up	no|down	1
Cs_ont_9g001220	yes|down	no|up	no|down	1
Cs_ont_9g000350	yes|down	no|up	no|down	1
Cs_ont_8g029270	yes|down	no|up	no|down	1
Cs_ont_8g024650	yes|down	no|up	no|down	1
Cs_ont_8g022690	yes|down	no|up	no|down	1
Cs_ont_8g020080	yes|down	no|up	no|down	1
Cs_ont_8g019380	yes|down	no|up	no|down	1
Cs_ont_8g012850	yes|down	no|up	no|down	1
Cs_ont_8g010140	yes|down	no|up	no|down	1
Cs_ont_8g006740	yes|down	no|up	no|down	1
Cs_ont_8g001860	yes|down	no|up	no|down	1
Cs_ont_7g029030	yes|down	no|up	no|down	1
Cs_ont_7g027580	yes|down	no|up	no|down	1
Cs_ont_7g027410	yes|down	no|up	no|down	1
Cs_ont_7g024670	yes|down	no|down	no|down	1
Cs_ont_7g024130	yes|down	no|up	no|down	1
Cs_ont_7g020330	yes|down	no|down	no|down	1
Cs_ont_7g019800	yes|down	no|up	no|down	1
Cs_ont_7g019370	yes|down	no|up	no|down	1
Cs_ont_7g018670	yes|down	no|down	no|down	1
Cs_ont_7g017040	yes|down	no|down	no|down	1
Cs_ont_7g016890	yes|down	no|up	no|down	1
Cs_ont_7g015790	yes|down	no|up	no|down	1
Cs_ont_7g015630	yes|down	no|up	no|down	1
Cs_ont_7g015380	yes|down	no|up	no|down	1
Cs_ont_7g015010	yes|down	no|up	no|down	1
Cs_ont_7g014640	yes|down	no|up	no|down	1
Cs_ont_7g012660	yes|down	no|down	no|down	1
Cs_ont_7g007810	yes|down	no|up	no|down	1
Cs_ont_7g004930	yes|down	no|up	no|down	1
Cs_ont_7g003070	yes|down	no|up	no|down	1
Cs_ont_7g000780	yes|down	no|down	no|down	1
Cs_ont_6g025360	yes|down	no|up	no|down	1
Cs_ont_6g020380	yes|down	no|up	no|down	1
Cs_ont_6g018900	yes|down	no|up	no|down	1
Cs_ont_6g016450	yes|down	no|up	no|down	1
Cs_ont_6g007620	yes|down	no|up	no|down	1
Cs_ont_6g007450	yes|down	no|up	no|down	1
Cs_ont_6g007050	yes|down	no|up	no|down	1
Cs_ont_6g006490	yes|down	no|down	no|down	1
Cs_ont_6g005190	yes|down	no|up	no|down	1
Cs_ont_6g000390	yes|down	no|up	no|down	1
Cs_ont_5g049760	yes|down	no|up	no|down	1
Cs_ont_5g048690	yes|down	no|up	no|down	1
Cs_ont_5g048270	yes|down	no|up	no|down	1
Cs_ont_5g047960	yes|down	no|up	no|down	1
Cs_ont_5g046530	yes|down	no|up	no|down	1
Cs_ont_5g044970	yes|down	no|up	no|down	1
Cs_ont_5g042580	yes|down	no|up	no|down	1
Cs_ont_5g042210	yes|down	no|down	no|down	1
Cs_ont_5g040910	yes|down	no|up	no|down	1
Cs_ont_5g033020	yes|down	no|up	no|down	1
Cs_ont_5g026980	yes|down	no|up	no|down	1
Cs_ont_5g025610	yes|down	no|up	no|down	1
Cs_ont_5g022490	yes|down	no|up	no|down	1
Cs_ont_5g019530	yes|down	no|up	no|down	1
Cs_ont_5g017320	yes|down	no|down	no|down	1
Cs_ont_5g017000	yes|down	no|up	no|down	1
Cs_ont_5g014690	yes|down	no|up	no|down	1
Cs_ont_5g014410	yes|down	no|up	no|down	1
Cs_ont_5g013790	yes|down	no|up	no|down	1
Cs_ont_5g013000	yes|down	no|up	no|down	1
Cs_ont_5g012740	yes|down	no|up	no|down	1
Cs_ont_5g011140	yes|down	no|up	no|down	1
Cs_ont_5g007730	yes|down	no|up	no|down	1
Cs_ont_5g007210	yes|down	no|up	no|down	1
Cs_ont_5g005850	yes|down	no|down	no|down	1
Cs_ont_5g005330	yes|down	no|up	no|down	1
Cs_ont_5g000220	yes|down	no|up	no|down	1
Cs_ont_4g026810	yes|down	no|up	no|down	1
Cs_ont_4g026450	yes|down	no|up	no|down	1
Cs_ont_4g026420	yes|down	no|up	no|down	1
Cs_ont_4g024700	yes|down	no|up	no|down	1
Cs_ont_4g022240	yes|down	no|up	no|down	1
Cs_ont_4g020590	yes|down	no|up	no|down	1
Cs_ont_4g019250	yes|down	no|up	no|down	1
Cs_ont_4g019120	yes|down	no|up	no|down	1
Cs_ont_4g019030	yes|down	no|up	no|down	1
Cs_ont_4g018550	yes|down	no|up	no|down	1
Cs_ont_4g017300	yes|down	no|up	no|down	1
Cs_ont_4g017110	yes|down	no|up	no|down	1
Cs_ont_4g017100	yes|down	no|up	no|down	1
Cs_ont_4g017020	yes|down	no|up	no|down	1
Cs_ont_4g017010	yes|down	no|up	no|down	1
Cs_ont_4g013300	yes|down	no|up	no|down	1
Cs_ont_4g011390	yes|down	no|up	no|down	1
Cs_ont_4g009550	yes|down	no|up	no|down	1
Cs_ont_4g007320	yes|down	no|up	no|down	1
Cs_ont_4g006050	yes|down	no|up	no|down	1
Cs_ont_4g004050	yes|down	no|up	no|down	1
Cs_ont_4g002520	yes|down	no|up	no|down	1
Cs_ont_3g030880	yes|down	no|up	no|down	1
Cs_ont_3g027900	yes|down	no|up	no|down	1
Cs_ont_3g023660	yes|down	no|up	no|down	1
Cs_ont_3g023640	yes|down	no|up	no|down	1
Cs_ont_3g022830	yes|down	no|down	no|down	1
Cs_ont_3g019270	yes|down	no|up	no|down	1
Cs_ont_3g013510	yes|down	no|up	no|down	1
Cs_ont_3g012760	yes|down	no|up	no|down	1
Cs_ont_3g009990	yes|down	no|up	no|down	1
Cs_ont_3g008630	yes|down	no|up	no|down	1
Cs_ont_3g007960	yes|down	no|down	no|down	1
Cs_ont_3g004490	yes|down	no|up	no|down	1
Cs_ont_3g003380	yes|down	no|up	no|down	1
Cs_ont_3g003130	yes|down	no|down	no|down	1
Cs_ont_2g035650	yes|down	no|up	no|down	1
Cs_ont_2g033730	yes|down	no|up	no|down	1
Cs_ont_2g031610	yes|down	no|up	no|down	1
Cs_ont_2g031290	yes|down	no|up	no|down	1
Cs_ont_2g030550	yes|down	no|up	no|down	1
Cs_ont_2g018960	yes|down	no|up	no|down	1
Cs_ont_2g018910	yes|down	no|up	no|down	1
Cs_ont_2g016770	yes|down	no|up	no|down	1
Cs_ont_2g012460	yes|down	no|up	no|down	1
Cs_ont_2g006480	yes|down	no|up	no|down	1
Cs_ont_2g005280	yes|down	no|up	no|down	1
Cs_ont_2g001880	yes|down	no|up	no|down	1
Cs_ont_1g027740	yes|down	no|up	no|down	1
Cs_ont_1g021300	yes|down	no|up	no|down	1
Cs_ont_1g021170	yes|down	no|up	no|down	1
Cs_ont_1g019000	yes|down	no|up	no|down	1
Cs_ont_1g018990	yes|down	no|up	no|down	1
Cs_ont_1g017480	yes|down	no|up	no|down	1
Cs_ont_1g011990	yes|down	no|up	no|down	1
Cs_ont_1g011170	yes|down	no|up	no|down	1
Cs_ont_1g008000	yes|down	no|up	no|down	1
Cs_ont_1g006860	yes|down	no|up	no|down	1
Cs_ont_1g004050	yes|down	no|up	no|down	1
Cs_ont_1g000780	yes|down	no|up	no|down	1
Cs_ont_9g027550	yes|down	no|up	no|up	1
Cs_ont_9g027530	yes|down	no|up	no|up	1
Cs_ont_9g003840	yes|down	no|up	no|up	1
Cs_ont_9g001210	yes|down	no|up	no|up	1
Cs_ont_8g022530	yes|down	no|up	no|up	1
Cs_ont_8g019530	yes|down	no|up	no|up	1
Cs_ont_7g004590	yes|down	no|up	no|up	1
Cs_ont_7g003860	yes|down	no|up	no|up	1
Cs_ont_7g003830	yes|down	no|up	no|up	1
Cs_ont_5g034320	yes|down	no|up	no|up	1
Cs_ont_5g019480	yes|down	no|up	no|up	1
Cs_ont_4g018850	yes|down	no|up	no|up	1
Cs_ont_4g017070	yes|down	no|up	no|up	1
Cs_ont_4g004130	yes|down	no|up	no|up	1
Cs_ont_2g034610	yes|down	no|up	no|up	1
Cs_ont_2g006440	yes|down	no|up	no|up	1
Cs_ont_2g006430	yes|down	no|up	no|up	1
Cs_ont_1g024950	yes|down	no|up	no|up	1
Cs_ont_1g017780	yes|down	no|up	no|up	1
Cs_ont_9g023840	yes|up	no|down	no|down	1
Cs_ont_7g008550	yes|up	no|down	no|down	1
Cs_ont_4g008410	yes|up	no|down	no|down	1
Cs_ont_4g005760	yes|up	no|down	no|down	1
Cs_ont_2g011440	yes|up	no|down	no|down	1
Cs_ont_1g023880	yes|up	no|down	no|down	1
Cs_ont_Un006130	yes|up	no|down	no|up	1
Cs_ont_Un000210	yes|up	no|down	no|up	1
Cs_ont_9g027600	yes|up	no|down	no|up	1
Cs_ont_9g026960	yes|up	no|down	no|up	1
Cs_ont_9g024420	yes|up	no|down	no|up	1
Cs_ont_9g024260	yes|up	no|down	no|up	1
Cs_ont_9g005600	yes|up	no|down	no|up	1
Cs_ont_8g029310	yes|up	no|down	no|up	1
Cs_ont_8g020480	yes|up	no|down	no|up	1
Cs_ont_8g015910	yes|up	no|down	no|up	1
Cs_ont_8g007440	yes|up	no|down	no|up	1
Cs_ont_8g005740	yes|up	no|down	no|up	1
Cs_ont_8g001910	yes|up	no|down	no|up	1
Cs_ont_7g024370	yes|up	no|down	no|up	1
Cs_ont_7g023970	yes|up	no|down	no|up	1
Cs_ont_7g017220	yes|up	no|down	no|up	1
Cs_ont_7g016140	yes|up	no|down	no|up	1
Cs_ont_7g005480	yes|up	no|down	no|up	1
Cs_ont_7g004960	yes|up	no|down	no|up	1
Cs_ont_7g002300	yes|up	no|down	no|up	1
Cs_ont_7g002080	yes|up	no|down	no|up	1
Cs_ont_7g001690	yes|up	no|down	no|up	1
Cs_ont_6g020440	yes|up	no|down	no|up	1
Cs_ont_6g018840	yes|up	no|down	no|up	1
Cs_ont_6g017760	yes|up	no|down	no|up	1
Cs_ont_6g015200	yes|up	no|down	no|up	1
Cs_ont_5g046100	yes|up	no|down	no|up	1
Cs_ont_5g045250	yes|up	no|down	no|up	1
Cs_ont_5g041500	yes|up	no|down	no|up	1
Cs_ont_5g038620	yes|up	no|down	no|up	1
Cs_ont_5g030990	yes|up	no|down	no|up	1
Cs_ont_5g022980	yes|up	no|down	no|up	1
Cs_ont_5g010230	yes|up	no|down	no|up	1
Cs_ont_4g028020	yes|up	no|down	no|up	1
Cs_ont_4g026590	yes|up	no|down	no|up	1
Cs_ont_4g025000	yes|up	no|down	no|up	1
Cs_ont_4g024570	yes|up	no|down	no|up	1
Cs_ont_4g012710	yes|up	no|down	no|up	1
Cs_ont_4g011890	yes|up	no|down	no|up	1
Cs_ont_4g003060	yes|up	no|down	no|up	1
Cs_ont_3g031500	yes|up	no|down	no|up	1
Cs_ont_3g031310	yes|up	no|down	no|up	1
Cs_ont_3g025070	yes|up	no|down	no|up	1
Cs_ont_3g024850	yes|up	no|down	no|up	1
Cs_ont_3g019370	yes|up	no|down	no|up	1
Cs_ont_3g018850	yes|up	no|down	no|up	1
Cs_ont_3g018730	yes|up	no|down	no|up	1
Cs_ont_3g008940	yes|up	no|down	no|up	1
Cs_ont_3g004300	yes|up	no|down	no|up	1
Cs_ont_3g002550	yes|up	no|down	no|up	1
Cs_ont_3g001740	yes|up	no|down	no|up	1
Cs_ont_3g000280	yes|up	no|down	no|up	1
Cs_ont_2g033990	yes|up	no|down	no|up	1
Cs_ont_2g021840	yes|up	no|up	no|up	1
Cs_ont_2g017530	yes|up	no|down	no|up	1
Cs_ont_2g009440	yes|up	no|down	no|up	1
Cs_ont_2g009370	yes|up	no|down	no|up	1
Cs_ont_2g008060	yes|up	no|no test	no|up	1
Cs_ont_2g006020	yes|up	no|down	no|up	1
Cs_ont_2g004190	yes|up	no|down	no|up	1
Cs_ont_2g001720	yes|up	no|down	no|up	1
Cs_ont_2g001190	yes|up	no|down	no|up	1
Cs_ont_2g000450	yes|up	no|down	no|up	1
Cs_ont_1g025010	yes|up	no|down	no|up	1
Cs_ont_1g022710	yes|up	no|down	no|up	1
Cs_ont_1g017520	yes|up	no|down	no|up	1
Cs_ont_1g010030	yes|up	no|down	no|up	1
Cs_ont_1g006260	yes|up	no|down	no|up	1
Cs_ont_1g005980	yes|up	no|down	no|up	1
Cs_ont_1g005350	yes|up	no|down	no|up	1

## Sheet: Table S6
Table S6 The correlation coefficients between the genes and phenotypes.
gene id	module	C17_1_1	C17_1_2	C17_1_3	C17_4_1	C17_4_2	C17_4_3	C17_7_1	C17_7_2	C17_7_3
Cs_ont_1g000570	yellow	0.411	0.137	0	0.274	0.548	-0.137	-0.548	-0.274	-0.411
Cs_ont_1g001610	yellow	0.411	0.137	0.548	0	0.274	-0.137	-0.548	-0.411	-0.274
Cs_ont_1g001620	yellow	0.274	0.411	0.548	0.137	0	-0.137	-0.548	-0.274	-0.411
Cs_ont_1g001940	yellow	-0.137	0	-0.274	0.411	0.548	0.274	-0.548	-0.411	0.137
Cs_ont_1g002300	yellow	0.274	0.411	0.548	0	0.137	-0.137	-0.548	-0.411	-0.274
Cs_ont_1g002430	yellow	0.274	0.411	0.548	0.137	0	-0.274	-0.548	-0.411	-0.137
Cs_ont_1g002510	yellow	0.274	0	0.137	0.411	0.548	-0.137	-0.548	-0.411	-0.274
Cs_ont_1g002520	yellow	0.137	0.274	0.411	0	0.548	-0.411	-0.274	-0.548	-0.137
Cs_ont_1g003430	yellow	0.411	0.274	0.548	0.137	0	-0.137	-0.548	-0.411	-0.274
Cs_ont_1g004200	yellow	0	0.274	-0.137	0.548	0.137	0.411	-0.548	-0.411	-0.274
Cs_ont_1g004600	yellow	0.274	0.411	0.137	0.548	0	-0.137	-0.548	-0.411	-0.274
Cs_ont_1g004630	yellow	0.137	-0.137	0	0.548	0.274	0.411	-0.411	-0.274	-0.548
Cs_ont_1g005430	yellow	0.55	0.275	0.413	0.138	0	-0.344	-0.55	-0.344	-0.138
Cs_ont_1g005460	yellow	0.137	-0.137	0.274	0.548	0.411	0	-0.548	-0.411	-0.274
Cs_ont_1g005550	yellow	0.548	0.274	0.411	0.137	0	-0.137	-0.548	-0.274	-0.411
Cs_ont_1g005560	yellow	0.548	0.411	0.137	0.274	0	-0.411	-0.548	-0.274	-0.137
Cs_ont_1g006280	yellow	0.548	0.411	0.137	0.274	0	-0.137	-0.548	-0.411	-0.274
Cs_ont_1g008870	yellow	0.411	0.137	0.548	0	0.274	-0.137	-0.411	-0.548	-0.274
Cs_ont_1g009220	yellow	0.548	0.274	0.411	0.137	0	-0.137	-0.548	-0.411	-0.274
Cs_ont_1g009250	yellow	0.411	0.274	0.548	0.137	0	-0.137	-0.548	-0.411	-0.274
Cs_ont_1g009260	yellow	0.548	0.274	0.411	0.137	0	-0.137	-0.548	-0.411	-0.274
Cs_ont_1g009380	yellow	0.548	0.274	0.411	0.137	0	-0.137	-0.548	-0.411	-0.274
Cs_ont_1g009580	yellow	0.411	0.137	0.548	0.274	-0.137	0	-0.548	-0.411	-0.274
Cs_ont_1g009640	yellow	0.411	0.274	0.548	0.137	0	-0.137	-0.548	-0.411	-0.274
Cs_ont_1g009750	yellow	0.274	0.411	0.548	0.137	-0.137	0	-0.548	-0.411	-0.274
Cs_ont_1g010000	yellow	0.274	0.548	0.411	0.137	-0.137	0	-0.411	-0.274	-0.548
Cs_ont_1g010270	yellow	0.137	0.411	-0.137	0.274	0.548	0	-0.274	-0.548	-0.411
Cs_ont_1g010900	yellow	0.548	0.411	0.274	0.137	0	-0.137	-0.548	-0.411	-0.274
Cs_ont_1g011030	yellow	0.411	0.548	0.137	0.274	0	-0.137	-0.548	-0.411	-0.274
Cs_ont_1g011620	yellow	0.548	0.274	0.411	0	-0.137	0.137	-0.548	-0.274	-0.411
Cs_ont_1g011730	yellow	0.137	0	0.274	0.411	0.548	-0.137	-0.548	-0.411	-0.274
Cs_ont_1g011770	yellow	0.137	0.548	0.411	0.274	0	-0.137	-0.548	-0.411	-0.274
Cs_ont_1g012160	yellow	0.411	-0.137	0.137	0.274	0.548	0	-0.274	-0.548	-0.411
Cs_ont_1g013100	yellow	0.137	0.548	0.411	0	-0.137	0.274	-0.548	-0.411	-0.274
Cs_ont_1g013880	yellow	0.137	0.274	0.548	0.411	0	-0.137	-0.411	-0.274	-0.548
Cs_ont_1g013950	yellow	0	0.274	0.411	-0.137	0.548	0.137	-0.411	-0.548	-0.274
Cs_ont_1g013980	yellow	0.481	0.481	0	-0.138	0.138	0.275	-0.275	-0.413	-0.55
Cs_ont_1g014220	yellow	0.274	0.137	0.548	0.411	0	-0.137	-0.548	-0.274	-0.411
Cs_ont_1g014910	yellow	0.411	0.137	0.548	-0.137	0.274	0	-0.411	-0.548	-0.274
Cs_ont_1g015040	yellow	0.548	0.274	0.411	0.137	0	-0.137	-0.548	-0.411	-0.274
Cs_ont_1g015830	yellow	0.274	0.411	0.137	0	0.548	-0.274	-0.137	-0.411	-0.548
Cs_ont_1g016480	yellow	-0.411	0.274	-0.137	0.411	0.548	0	-0.548	-0.274	0.137
Cs_ont_1g016570	yellow	0	-0.274	0.274	0.411	0.548	0.137	-0.548	-0.411	-0.137
Cs_ont_1g016760	yellow	-0.274	-0.137	0	0.548	0.274	0.411	-0.548	0.137	-0.411
Cs_ont_1g016770	yellow	0.274	0.548	-0.137	0.411	0	0.137	-0.548	-0.274	-0.411
Cs_ont_1g017000	yellow	0.274	0	0.137	-0.137	0.548	0.411	-0.411	-0.274	-0.548
Cs_ont_1g017510	yellow	0.137	0.411	-0.274	0.274	0.548	0	-0.411	-0.548	-0.137
Cs_ont_1g017740	yellow	0.548	0.274	0.411	0	0.137	-0.137	-0.548	-0.411	-0.274
Cs_ont_1g018080	yellow	0	0.274	0.137	-0.137	0.548	0.411	-0.548	-0.411	-0.274
Cs_ont_1g019140	yellow	0.274	0.411	0.548	0.137	-0.137	0	-0.411	-0.274	-0.548
Cs_ont_1g019190	yellow	-0.137	0	0.137	0.411	0.548	0.274	-0.411	-0.548	-0.274
Cs_ont_1g019630	yellow	-0.274	-0.137	0.274	0.548	0.411	0.137	-0.548	-0.411	0
Cs_ont_1g019900	yellow	0.548	0.411	0.274	0	0.137	-0.137	-0.548	-0.411	-0.274
Cs_ont_1g020770	yellow	0.274	0.411	0.137	0.548	-0.137	0	-0.548	-0.411	-0.274
Cs_ont_1g020940	yellow	0.411	0.274	0.548	-0.137	0.137	0	-0.411	-0.274	-0.548
Cs_ont_1g020980	yellow	0.274	0.548	0.411	0	0.137	-0.137	-0.548	-0.274	-0.411
Cs_ont_1g020990	yellow	0.411	0.548	0.274	0.137	0	-0.137	-0.548	-0.411	-0.274
Cs_ont_1g021460	yellow	0.274	0.137	0.548	0	0.411	-0.137	-0.548	-0.411	-0.274
Cs_ont_1g021480	yellow	0.548	0.274	0.411	0	0.137	-0.137	-0.548	-0.411	-0.274
Cs_ont_1g021530	yellow	0	0.274	0.137	0.411	0.548	-0.137	-0.411	-0.548	-0.274
Cs_ont_1g021550	yellow	0.137	0	0.411	0.274	0.548	-0.137	-0.274	-0.411	-0.548
Cs_ont_1g021620	yellow	0	-0.137	0.137	0.411	0.274	0.548	-0.548	-0.411	-0.274
Cs_ont_1g021880	yellow	0.411	0.548	0.274	0	0.137	-0.274	-0.548	-0.137	-0.411
Cs_ont_1g022340	yellow	0.137	-0.137	0.274	0.411	0.548	0	-0.548	-0.411	-0.274
Cs_ont_1g023010	yellow	0.548	0.274	0.411	0	0.137	-0.137	-0.548	-0.411	-0.274
Cs_ont_1g023740	yellow	0	-0.137	0.137	0.548	0.411	0.274	-0.548	-0.274	-0.411
Cs_ont_1g023900	yellow	0.411	0.548	0	0.274	-0.137	0.137	-0.548	-0.274	-0.411
Cs_ont_1g024000	yellow	0.137	-0.137	0.274	0.548	0	0.411	-0.274	-0.411	-0.548
Cs_ont_1g024260	yellow	0.274	0.548	0.411	0.137	-0.137	0	-0.548	-0.411	-0.274
Cs_ont_1g024770	yellow	0.548	0.274	0.411	0	0.137	-0.137	-0.548	-0.411	-0.274
Cs_ont_1g025350	yellow	0.548	0.411	0.274	0.137	0	-0.137	-0.548	-0.411	-0.274
Cs_ont_1g025580	yellow	0.274	0	-0.137	0.411	0.548	0.137	-0.548	-0.274	-0.411
Cs_ont_1g025610	yellow	0	0.137	-0.137	0.548	0.411	0.274	-0.274	-0.548	-0.411
Cs_ont_1g025830	yellow	0.274	0.548	0.411	0.137	0	-0.137	-0.548	-0.274	-0.411
Cs_ont_1g025870	yellow	0.411	0.548	0.137	0.274	0	-0.137	-0.411	-0.274	-0.548
Cs_ont_1g026160	yellow	0	-0.137	0.137	0.548	0.274	0.411	-0.548	-0.274	-0.411
Cs_ont_1g026210	yellow	0.548	0.274	0.411	0.137	0	-0.137	-0.548	-0.411	-0.274
Cs_ont_1g026230	yellow	0.548	0.411	0.274	0	0.137	-0.137	-0.548	-0.411	-0.274
Cs_ont_1g026820	yellow	-0.137	0.137	-0.274	0.411	0.548	0.274	-0.548	0	-0.411
Cs_ont_1g027040	yellow	0.411	0.274	0.548	-0.137	0.137	0	-0.274	-0.411	-0.548
Cs_ont_1g027050	yellow	-0.137	0	0.137	0.548	0.274	0.411	-0.548	-0.411	-0.274
Cs_ont_1g027110	yellow	0.548	0.411	0.137	0.274	0	-0.137	-0.548	-0.274	-0.411
Cs_ont_1g027510	yellow	0.274	-0.137	0.411	0	0.548	0.137	-0.411	-0.274	-0.548
Cs_ont_1g027520	yellow	0.137	-0.274	0.411	0.274	0.548	0	-0.548	-0.411	-0.137
Cs_ont_1g027690	yellow	0.274	0.548	0.411	0	0.137	-0.137	-0.274	-0.548	-0.411
Cs_ont_1g028280	yellow	0	-0.137	0.411	0.274	0.548	0.137	-0.548	-0.411	-0.274
Cs_ont_1g028320	yellow	0.137	0	0.411	0.274	0.548	-0.137	-0.548	-0.411	-0.274
Cs_ont_1g028400	yellow	0.411	0.548	0.274	0	-0.137	0.137	-0.548	-0.274	-0.411
Cs_ont_2g000330	yellow	0.137	0.274	0.411	0	0.548	-0.137	-0.548	-0.411	-0.274
Cs_ont_2g000620	yellow	0.548	0.411	0.274	0	0.137	-0.137	-0.548	-0.411	-0.274
Cs_ont_2g001420	yellow	0.137	0.411	0	0.274	0.548	-0.274	-0.548	-0.137	-0.411
Cs_ont_2g001750	yellow	0.137	0	-0.274	0.548	0.274	0.411	-0.548	-0.411	-0.137
Cs_ont_2g001850	yellow	0.411	0.548	0.137	0.274	-0.274	0	-0.548	-0.137	-0.411
Cs_ont_2g002580	yellow	0.411	0.548	0.137	0.274	0	-0.137	-0.274	-0.548	-0.411
Cs_ont_2g002590	yellow	0.411	0.548	0.137	0.274	0	-0.137	-0.274	-0.411	-0.548
Cs_ont_2g002600	yellow	0.274	0.548	0.137	0.411	0	-0.137	-0.411	-0.274	-0.548
Cs_ont_2g002610	yellow	0.274	0.411	0.137	0.548	-0.137	0	-0.274	-0.411	-0.548
Cs_ont_2g002630	yellow	0.274	0.548	0.137	0.411	-0.137	0	-0.274	-0.411	-0.548
Cs_ont_2g002640	yellow	0.274	0.548	0.137	0.411	-0.137	0	-0.274	-0.548	-0.411
Cs_ont_2g003400	yellow	0.274	0.411	0.548	0.137	0	-0.137	-0.548	-0.411	-0.274
Cs_ont_2g003520	yellow	0.274	0.411	0.137	0.548	-0.137	0	-0.548	-0.274	-0.411
Cs_ont_2g003540	yellow	0.137	0.274	0.411	0	0.548	-0.137	-0.548	-0.274	-0.411
Cs_ont_2g003640	yellow	0.411	0.274	0.137	0	-0.137	0.548	-0.411	-0.274	-0.548
Cs_ont_2g003780	yellow	0.548	0.411	0.274	0.137	0	-0.137	-0.548	-0.411	-0.274
Cs_ont_2g003900	yellow	0	-0.137	0.137	0.411	0.548	0.274	-0.411	-0.548	-0.274
Cs_ont_2g003950	yellow	0.137	0	0.411	0.548	0.274	-0.137	-0.411	-0.274	-0.548
Cs_ont_2g004030	yellow	0.411	0.274	0.548	0	0.137	-0.137	-0.411	-0.548	-0.274
Cs_ont_2g004050	yellow	0	0.274	0.137	-0.137	0.411	0.548	-0.548	-0.274	-0.411
Cs_ont_2g004060	yellow	0.411	0.274	0	0.137	0.548	-0.137	-0.548	-0.411	-0.274
Cs_ont_2g004980	yellow	0.274	-0.411	0.137	0.548	0	0.411	-0.548	-0.274	-0.137
Cs_ont_2g006050	yellow	0.411	0.548	0.137	-0.137	0.274	0	-0.548	-0.274	-0.411
Cs_ont_2g006430	yellow	-0.274	0	0.137	0.548	0.274	0.411	-0.548	-0.411	-0.137
Cs_ont_2g006440	yellow	-0.411	-0.137	0.137	0.411	0.274	0.548	-0.548	-0.274	0
Cs_ont_2g006470	yellow	-0.137	0	0.137	0.548	0.274	0.411	-0.548	-0.411	-0.274
Cs_ont_2g006520	yellow	0.411	0.548	0.137	0.274	-0.137	0	-0.274	-0.411	-0.548
Cs_ont_2g006620	yellow	-0.137	0	0.274	0.411	0.548	0.137	-0.548	-0.411	-0.274
Cs_ont_2g006640	yellow	0.137	0.274	0	0.411	0.548	-0.137	-0.548	-0.411	-0.274
Cs_ont_2g006650	yellow	-0.137	0.274	0	0.548	0.411	0.137	-0.548	-0.411	-0.274
Cs_ont_2g006830	yellow	0.137	0.411	0	0.548	-0.137	0.274	-0.411	-0.274	-0.548
Cs_ont_2g006890	yellow	0.137	0	-0.137	0.274	0.411	0.548	-0.548	-0.274	-0.411
Cs_ont_2g007130	yellow	0.137	0.274	0	0.548	-0.137	0.411	-0.411	-0.274	-0.548
Cs_ont_2g007350	yellow	0.137	-0.274	-0.137	0.411	0.548	0	0.274	-0.411	-0.548
Cs_ont_2g007470	yellow	0.274	0.411	0.137	0.548	0	-0.137	-0.548	-0.274	-0.411
Cs_ont_2g007730	yellow	0.411	0.548	0.137	0.274	0	-0.137	-0.548	-0.274	-0.411
Cs_ont_2g007790	yellow	0.137	0	0.274	0.411	0.548	-0.274	-0.411	-0.548	-0.137
Cs_ont_2g007800	yellow	0.411	0.274	0.548	0	0.137	-0.137	-0.411	-0.548	-0.274
Cs_ont_2g008370	yellow	0.137	0.411	0	-0.137	0.548	0.274	-0.274	-0.548	-0.411
Cs_ont_2g009010	yellow	0.548	0.411	0	0.274	0.137	-0.137	-0.274	-0.548	-0.411
Cs_ont_2g009080	yellow	0.411	0.548	0.137	0.274	-0.137	0	-0.411	-0.274	-0.548
Cs_ont_2g009130	yellow	0.411	0.548	0.274	0.137	-0.137	0	-0.411	-0.274	-0.548
Cs_ont_2g009250	yellow	0.548	0.411	0.274	0	0.137	-0.137	-0.274	-0.548	-0.411
Cs_ont_2g009580	yellow	0.411	0.548	0.137	0.274	-0.137	0	-0.548	-0.411	-0.274
Cs_ont_2g009890	yellow	0.411	0.274	0.548	0	0.137	-0.137	-0.548	-0.274	-0.411
Cs_ont_2g010300	yellow	0.411	0.274	0.548	0.137	0	-0.137	-0.548	-0.411	-0.274
Cs_ont_2g010350	yellow	0.137	0.274	0.548	0	0.411	-0.137	-0.548	-0.411	-0.274
Cs_ont_2g010740	yellow	0	-0.137	0.137	0.548	0.274	0.411	-0.548	-0.411	-0.274
Cs_ont_2g010880	yellow	0.137	0.548	0.274	0.411	-0.137	0	-0.548	-0.411	-0.274
Cs_ont_2g011090	yellow	0.274	0	0.137	0.548	0.411	-0.137	-0.548	-0.411	-0.274
Cs_ont_2g011140	yellow	0.411	0.274	0	0.137	-0.137	0.548	-0.548	-0.274	-0.411
Cs_ont_2g011200	yellow	0.274	0	0.411	0.548	0.137	-0.137	-0.274	-0.548	-0.411
Cs_ont_2g011280	yellow	0	0.274	0.137	0.411	0.548	-0.137	-0.548	-0.411	-0.274
Cs_ont_2g011710	yellow	0.137	-0.274	0	0.548	0.274	0.411	-0.411	-0.137	-0.548
Cs_ont_2g012270	yellow	0	0.137	-0.137	0.411	0.274	0.548	-0.548	-0.274	-0.411
Cs_ont_2g012680	yellow	0	0.411	0.274	0.137	0.548	-0.137	-0.274	-0.548	-0.411
Cs_ont_2g012780	yellow	0.274	0.137	-0.137	0.548	0.411	0	-0.274	-0.411	-0.548
Cs_ont_2g013870	yellow	-0.137	0	0.411	0.137	0.548	0.274	-0.411	-0.548	-0.274
Cs_ont_2g014520	yellow	0.411	0.548	0.274	0	0.137	-0.137	-0.548	-0.274	-0.411
Cs_ont_2g015590	yellow	0.274	0.548	0.411	0.137	0	-0.137	-0.548	-0.274	-0.411
Cs_ont_2g016180	yellow	0.548	0.274	0.411	0.137	0	-0.137	-0.411	-0.548	-0.274
Cs_ont_2g016560	yellow	0.411	0.548	0.137	0.274	0	-0.137	-0.548	-0.274	-0.411
Cs_ont_2g016750	yellow	0.274	0.411	0.137	0.548	-0.137	0	-0.548	-0.274	-0.411
Cs_ont_2g016820	yellow	-0.137	0.411	0.274	0.548	0	0.137	-0.548	-0.411	-0.274
Cs_ont_2g017240	yellow	0.548	0.274	0.411	0	0.137	-0.137	-0.548	-0.411	-0.274
Cs_ont_2g017340	yellow	0.274	0.548	0.137	0.411	-0.137	0	-0.274	-0.548	-0.411
Cs_ont_2g018470	yellow	0.137	-0.137	0.411	0.274	0.548	0	-0.548	-0.411	-0.274
Cs_ont_2g018650	yellow	0.274	0.548	0.411	0.137	0	-0.137	-0.548	-0.411	-0.274
Cs_ont_2g018770	yellow	0.137	0.274	0.411	0.548	0	-0.137	-0.548	-0.411	-0.274
Cs_ont_2g018890	yellow	0	-0.137	0.274	0.411	0.548	0.137	-0.411	-0.548	-0.274
Cs_ont_2g019250	yellow	0.137	0.411	-0.137	0.548	0.274	0	-0.548	-0.411	-0.274
Cs_ont_2g020480	yellow	0.274	0.411	0.137	-0.274	0	0.548	-0.548	-0.411	-0.137
Cs_ont_2g020760	yellow	0.274	0	0.137	0.548	0.411	-0.137	-0.548	-0.274	-0.411
Cs_ont_2g021180	yellow	0.411	0.548	0.274	0.137	-0.137	0	-0.411	-0.274	-0.548
Cs_ont_2g021590	yellow	0.137	0.411	0.274	0	0.548	-0.274	-0.548	-0.411	-0.137
Cs_ont_2g023850	yellow	0.548	-0.137	0.274	0	0.411	0.137	-0.411	-0.274	-0.548
Cs_ont_2g024160	yellow	0.411	0.274	0.548	0.137	-0.137	0	-0.548	-0.411	-0.274
Cs_ont_2g024530	yellow	0	0.137	0.274	0.411	0.548	-0.137	-0.548	-0.274	-0.411
Cs_ont_2g025070	yellow	0	0.137	-0.274	0.411	0.548	0.274	-0.548	-0.411	-0.137
Cs_ont_2g025420	yellow	0.274	0.411	0.137	0.548	-0.137	0	-0.411	-0.548	-0.274
Cs_ont_2g025830	yellow	0.274	0.411	0.548	0.137	0	-0.137	-0.274	-0.548	-0.411
Cs_ont_2g025860	yellow	0.548	0.137	0.411	0	0.274	-0.137	-0.548	-0.274	-0.411
Cs_ont_2g025890	yellow	0	-0.274	0.137	0.548	0.274	0.411	-0.548	-0.411	-0.137
Cs_ont_2g025900	yellow	0.411	0.274	0.548	-0.137	0.137	0	-0.411	-0.274	-0.548
Cs_ont_2g026160	yellow	0.274	0.411	0.137	0.548	0	-0.137	-0.548	-0.274	-0.411
Cs_ont_2g026210	yellow	-0.137	0.137	0	0.274	0.548	0.411	-0.548	-0.411	-0.274
Cs_ont_2g026450	yellow	0.411	0.274	0.548	0.137	0	-0.137	-0.548	-0.274	-0.411
Cs_ont_2g026560	yellow	0.274	0.548	0.411	0.137	0	-0.137	-0.548	-0.411	-0.274
Cs_ont_2g027190	yellow	0.137	0.274	0.411	-0.137	0.548	0	-0.274	-0.548	-0.411
Cs_ont_2g027830	yellow	0	-0.274	-0.137	0.274	0.548	0.411	-0.548	0.137	-0.411
Cs_ont_2g028550	yellow	0.137	0	-0.137	0.274	0.411	0.548	-0.548	-0.274	-0.411
Cs_ont_2g028740	yellow	0.274	0.411	0.548	0.137	-0.137	0	-0.548	-0.274	-0.411
Cs_ont_2g029030	yellow	0.137	-0.137	0.411	0	0.548	0.274	-0.548	-0.411	-0.274
Cs_ont_2g029140	yellow	0.137	0.274	0.411	-0.274	0.548	-0.137	-0.548	0	-0.411
Cs_ont_2g029450	yellow	0	0.137	-0.137	0.548	0.411	0.274	-0.548	-0.411	-0.274
Cs_ont_2g029650	yellow	0.411	0.274	0.548	0.137	-0.137	0	-0.548	-0.274	-0.411
Cs_ont_2g029660	yellow	0.548	0.137	0.411	0	-0.137	0.274	-0.411	-0.548	-0.274
Cs_ont_2g030090	yellow	0.411	0.274	0.548	0	0.137	-0.137	-0.548	-0.274	-0.411
Cs_ont_2g030120	yellow	0.411	0.274	0.548	-0.137	0.137	0	-0.274	-0.548	-0.411
Cs_ont_2g031180	yellow	0.548	0.411	0.274	0.137	-0.274	-0.411	-0.548	-0.137	0
Cs_ont_2g031470	yellow	0.548	0.274	0.411	0.137	0	-0.137	-0.548	-0.411	-0.274
Cs_ont_2g031910	yellow	0.411	0.274	0.548	0.137	0	-0.137	-0.548	-0.411	-0.274
Cs_ont_2g032560	yellow	-0.274	0	0.137	0.411	0.548	0.274	-0.548	-0.411	-0.137
Cs_ont_2g032730	yellow	0	0.137	-0.274	0.548	0.411	0.274	-0.548	-0.411	-0.137
Cs_ont_2g033040	yellow	0	0.137	-0.274	0.548	0.411	0.274	-0.137	-0.548	-0.411
Cs_ont_2g033350	yellow	0.411	0.274	0.548	0	0.137	-0.137	-0.411	-0.548	-0.274
Cs_ont_2g033640	yellow	0.548	0.411	0.274	-0.137	0.137	0	-0.411	-0.274	-0.548
Cs_ont_2g033660	yellow	0.137	0	0.411	0.548	0.274	-0.137	-0.548	-0.411	-0.274
Cs_ont_2g033670	yellow	0	-0.274	0.137	0.548	0.274	0.411	-0.548	-0.411	-0.137
Cs_ont_2g033700	yellow	0.411	0.274	0.548	0.137	0	-0.137	-0.548	-0.411	-0.274
Cs_ont_2g033800	yellow	-0.411	-0.274	-0.137	0.548	0.137	0.411	-0.548	0	0.274
Cs_ont_2g034210	yellow	0.137	-0.274	-0.137	0.548	0.274	0.411	-0.411	-0.548	0
Cs_ont_2g034240	yellow	0.548	0.411	0.137	0	0.274	-0.137	-0.411	-0.548	-0.274
Cs_ont_2g034290	yellow	0.548	0.411	0.137	0.274	0	-0.137	-0.548	-0.411	-0.274
Cs_ont_2g034300	yellow	0.137	-0.137	0.411	0.274	0.548	0	-0.411	-0.548	-0.274
Cs_ont_2g034500	yellow	0.274	0.411	0.548	0.137	0	-0.137	-0.548	-0.411	-0.274
Cs_ont_2g034730	yellow	0.411	0.274	0.548	0	0.137	-0.137	-0.548	-0.274	-0.411
Cs_ont_2g034830	yellow	0.411	0.274	0.548	0.137	0	-0.137	-0.548	-0.411	-0.274
Cs_ont_2g035040	yellow	0.548	0.274	0.411	0.137	-0.137	0	-0.548	-0.411	-0.274
Cs_ont_2g035210	yellow	0	-0.274	0.137	0.411	0.548	-0.137	-0.548	-0.411	0.274
Cs_ont_2g035270	yellow	0.548	0.411	0.274	0.137	0	-0.137	-0.548	-0.274	-0.411
Cs_ont_2g035470	yellow	-0.137	0	0.274	0.548	0.411	0.137	-0.548	-0.274	-0.411
Cs_ont_2g035630	yellow	0.411	0.548	0.274	0.137	-0.137	0	-0.274	-0.548	-0.411
Cs_ont_2g035730	yellow	0.137	-0.137	0	0.548	0.274	0.411	-0.411	-0.548	-0.274
Cs_ont_3g000100	yellow	-0.3	-0.3	0.45	0.3	0.15	0.6	-0.3	-0.3	-0.3
Cs_ont_3g000770	yellow	0.274	0.411	0.137	0.548	0	-0.137	-0.548	-0.411	-0.274
Cs_ont_3g001230	yellow	0.137	0.548	-0.137	0.411	0.274	0	-0.411	-0.274	-0.548
Cs_ont_3g001620	yellow	0.411	0.548	0.137	0.274	-0.137	0	-0.274	-0.411	-0.548
Cs_ont_3g001630	yellow	0.411	0.548	0.137	0.274	-0.137	0	-0.411	-0.274	-0.548
Cs_ont_3g001680	yellow	0.411	0.548	0.274	0.137	0	-0.137	-0.548	-0.274	-0.411
Cs_ont_3g002420	yellow	0.411	0.548	0.274	0.137	0	-0.137	-0.548	-0.411	-0.274
Cs_ont_3g003610	yellow	0.274	0.137	0.411	-0.137	0.548	0	-0.548	-0.411	-0.274
Cs_ont_3g003970	yellow	0.411	0.548	0.274	0.137	-0.137	0	-0.548	-0.411	-0.274
Cs_ont_3g004210	yellow	0.548	0.411	0.137	0	0.274	-0.137	-0.411	-0.548	-0.274
Cs_ont_3g004840	yellow	0.137	0	0.274	0.548	0.411	-0.137	-0.548	-0.411	-0.274
Cs_ont_3g004910	yellow	0	0.137	-0.137	0.548	0.274	0.411	-0.274	-0.411	-0.548
Cs_ont_3g005080	yellow	0.411	0.548	0.274	0.137	0	-0.137	-0.548	-0.411	-0.274
Cs_ont_3g005500	yellow	-0.137	0.274	-0.274	0.137	0.411	0.548	-0.548	-0.411	0
Cs_ont_3g005850	yellow	0.548	0.274	0.411	-0.137	0	0.137	-0.274	-0.411	-0.548
Cs_ont_3g005920	yellow	0.274	0.548	0.411	0.137	0	-0.137	-0.411	-0.548	-0.274
Cs_ont_3g005930	yellow	0.411	0.274	0.548	0.137	0	-0.137	-0.274	-0.411	-0.548
Cs_ont_3g006300	yellow	0	0.137	-0.137	0.548	0.274	0.411	-0.411	-0.274	-0.548
Cs_ont_3g006470	yellow	0	-0.137	0.274	0.137	0.411	0.548	-0.548	-0.411	-0.274
Cs_ont_3g006910	yellow	0.274	0.548	0.137	0.411	0	-0.137	-0.274	-0.548	-0.411
Cs_ont_3g006980	yellow	0.411	0.274	0.137	0	0.548	-0.274	-0.411	-0.548	-0.137
Cs_ont_3g009000	yellow	0.137	0.274	0.548	0	0.411	-0.137	-0.548	-0.411	-0.274
Cs_ont_3g009100	yellow	0.548	0.137	0	0.411	0.274	-0.137	-0.548	-0.411	-0.274
Cs_ont_3g010450	yellow	-0.274	-0.137	0.137	0.548	0.274	0.411	-0.548	0	-0.411
Cs_ont_3g011150	yellow	0	0.274	0.411	-0.137	0.548	0.137	-0.548	-0.411	-0.274
Cs_ont_3g011210	yellow	0.411	0.274	0.548	0	0.137	-0.137	-0.411	-0.548	-0.274
Cs_ont_3g011270	yellow	0	0.274	0.137	0.411	0.548	-0.137	-0.548	-0.411	-0.274
Cs_ont_3g011610	yellow	-0.137	-0.274	0	0.274	0.548	0.411	-0.548	-0.411	0.137
Cs_ont_3g011970	yellow	0.137	0.411	-0.137	0.548	0.274	0	-0.548	-0.411	-0.274
Cs_ont_3g012200	yellow	0.548	0.411	0.274	0	0.137	-0.137	-0.548	-0.274	-0.411
Cs_ont_3g012310	yellow	0.411	0.548	0.274	0.137	0	-0.137	-0.274	-0.548	-0.411
Cs_ont_3g012490	yellow	0.137	0	0.274	0.548	0.411	-0.548	-0.137	-0.411	-0.274
Cs_ont_3g013110	yellow	0.548	0.274	0.411	0.137	0	-0.137	-0.548	-0.411	-0.274
Cs_ont_3g013220	yellow	0.548	0.274	0.137	0.411	0	-0.137	-0.274	-0.411	-0.548
Cs_ont_3g013760	yellow	0.137	-0.137	0.274	0.411	0.548	0	-0.548	-0.411	-0.274
Cs_ont_3g013920	yellow	0.274	0.548	0	0.411	0.137	-0.411	-0.548	-0.137	-0.274
Cs_ont_3g014580	yellow	0.274	0.411	0.548	0.137	0	-0.137	-0.274	-0.548	-0.411
Cs_ont_3g014710	yellow	-0.137	0.274	0.137	0.548	0.411	0	-0.548	-0.411	-0.274
Cs_ont_3g014750	yellow	0.274	0.548	0.411	0.137	0	-0.137	-0.548	-0.411	-0.274
Cs_ont_3g014780	yellow	0.411	0.274	0.548	0	0.137	-0.137	-0.548	-0.411	-0.274
Cs_ont_3g014790	yellow	0	0.275	0.55	0.413	0.138	-0.138	-0.481	-0.481	-0.275
Cs_ont_3g015160	yellow	0.274	0.137	0	0.548	0.411	-0.274	-0.548	-0.411	-0.137
Cs_ont_3g015230	yellow	0.274	0.137	0	0.411	0.548	-0.274	-0.548	-0.411	-0.137
Cs_ont_3g015480	yellow	0.411	0	0.274	0.137	0.548	-0.274	-0.548	-0.411	-0.137
Cs_ont_3g016680	yellow	0.548	0.274	0.411	0.137	0	-0.137	-0.274	-0.548	-0.411
Cs_ont_3g017190	yellow	-0.274	0	0.411	0.274	0.548	-0.137	-0.548	-0.411	0.137
Cs_ont_3g019530	yellow	0.411	0.274	0.548	0.137	-0.274	0	-0.548	-0.137	-0.411
Cs_ont_3g019670	yellow	-0.411	0.274	0.137	0.548	0.411	0	-0.548	-0.274	-0.137
Cs_ont_3g019700	yellow	-0.411	0	0.411	0.548	0.274	-0.137	-0.548	-0.274	0.137
Cs_ont_3g020450	yellow	-0.137	0	0.411	0.548	0.274	0.137	-0.548	-0.411	-0.274
Cs_ont_3g021080	yellow	0.411	0.274	0.548	0.137	0	-0.137	-0.548	-0.411	-0.274
Cs_ont_3g021790	yellow	0.274	0.411	0.548	0	0.137	-0.137	-0.548	-0.411	-0.274
Cs_ont_3g021810	yellow	0.275	0.55	0.413	0	0.138	-0.138	-0.55	-0.344	-0.344
Cs_ont_3g021820	yellow	0.411	0.548	0.274	0.137	0	-0.411	-0.548	-0.137	-0.274
Cs_ont_3g021920	yellow	0.411	-0.548	0	0.274	0.548	0.137	-0.137	-0.274	-0.411
Cs_ont_3g022160	yellow	0.275	-0.138	0	0.413	0.55	0.138	-0.481	-0.481	-0.275
Cs_ont_3g022580	yellow	0.137	-0.137	0.548	0.411	0.274	0	-0.411	-0.548	-0.274
Cs_ont_3g022920	yellow	0.548	0.411	0.274	0	0.137	-0.274	-0.548	-0.411	-0.137
Cs_ont_3g023030	yellow	0.411	0.548	0.137	0.274	0	-0.137	-0.548	-0.411	-0.274
Cs_ont_3g023040	yellow	0.274	0.548	0.137	0.411	0	-0.137	-0.548	-0.274	-0.411
Cs_ont_3g023070	yellow	0.274	0.411	0.548	0.137	0	-0.137	-0.548	-0.274	-0.411
Cs_ont_3g023080	yellow	0	0.137	0.274	0.411	0.548	-0.137	-0.548	-0.411	-0.274
Cs_ont_3g023200	yellow	0.274	0.548	0.411	0.137	0	-0.137	-0.548	-0.411	-0.274
Cs_ont_3g023330	yellow	0.274	0.548	0.137	0.411	0	-0.137	-0.548	-0.274	-0.411
Cs_ont_3g023360	yellow	0.411	0.274	0.137	0.548	0	-0.137	-0.548	-0.411	-0.274
Cs_ont_3g023370	yellow	0	0.274	0.411	0.137	0.548	-0.137	-0.548	-0.411	-0.274
Cs_ont_3g023980	yellow	0.411	0.548	0.274	0.137	0	-0.274	-0.548	-0.411	-0.137
Cs_ont_3g024210	yellow	0.411	0.548	0.274	-0.274	0	0.137	-0.548	-0.137	-0.411
Cs_ont_3g025120	yellow	0.411	0.274	0.548	0	0.137	-0.274	-0.548	-0.137	-0.411
Cs_ont_3g026830	yellow	0.413	0	0.55	0.138	0.275	-0.138	-0.481	-0.481	-0.275
Cs_ont_3g027070	yellow	0	-0.411	0.137	0.548	0.411	0.274	-0.548	-0.274	-0.137
Cs_ont_3g027160	yellow	0	-0.274	0.137	0.548	0.411	0.274	-0.548	-0.411	-0.137
Cs_ont_3g027290	yellow	0.411	0.548	0.274	0.137	0	-0.137	-0.411	-0.274	-0.548
Cs_ont_3g027300	yellow	0	0.137	0.274	0.411	0.548	-0.137	-0.411	-0.548	-0.274
Cs_ont_3g027360	yellow	0	0.137	-0.137	0.411	0.548	0.274	-0.548	-0.274	-0.411
Cs_ont_3g027870	yellow	0.411	0.548	0.137	0.274	0	-0.137	-0.548	-0.274	-0.411
Cs_ont_3g027880	yellow	0.411	0.548	0.137	0.274	0	-0.137	-0.548	-0.274	-0.411
Cs_ont_3g028310	yellow	0.411	0.274	0.548	0.137	0	-0.137	-0.548	-0.411	-0.274
Cs_ont_3g028560	yellow	0.274	0.548	0.411	0.137	0	-0.137	-0.548	-0.274	-0.411
Cs_ont_3g029660	yellow	-0.137	0	0.137	0.548	0.411	0.274	-0.548	-0.411	-0.274
Cs_ont_3g030090	yellow	0	-0.137	0.274	0.548	0.411	0.137	-0.548	-0.411	-0.274
Cs_ont_3g030250	yellow	0.274	0.137	0	0.411	0.548	-0.137	-0.548	-0.274	-0.411
Cs_ont_3g030260	yellow	0	0.137	0.411	0.274	0.548	-0.137	-0.548	-0.411	-0.274
Cs_ont_3g030540	yellow	0	0.411	0.137	0.548	0.274	-0.137	-0.548	-0.274	-0.411
Cs_ont_3g031210	yellow	0.548	0.411	0.137	0.274	-0.137	0	-0.548	-0.274	-0.411
Cs_ont_3g031890	yellow	-0.137	0.411	0.274	0.137	0.548	0	-0.548	-0.411	-0.274
Cs_ont_3g031910	yellow	0.274	0.548	0.137	0.411	0	-0.274	-0.411	-0.137	-0.548
Cs_ont_3g032920	yellow	0.548	0	0.411	0.274	0.137	-0.137	-0.548	-0.411	-0.274
Cs_ont_3g032940	yellow	0.411	0.548	0.274	0	0.137	-0.137	-0.548	-0.274	-0.411
Cs_ont_3g033190	yellow	0.411	0.274	0.548	0.137	-0.137	0	-0.548	-0.411	-0.274
Cs_ont_3g033420	yellow	0.137	0.548	0.411	0.274	0	-0.137	-0.548	-0.411	-0.274
Cs_ont_3g033440	yellow	0.137	0.548	0	0.411	0.274	-0.137	-0.548	-0.274	-0.411
Cs_ont_3g033460	yellow	0.274	0.548	0.411	0.137	-0.137	0	-0.548	-0.411	-0.274
Cs_ont_3g033470	yellow	0.411	0.548	0.274	0	0.137	-0.137	-0.548	-0.411	-0.274
Cs_ont_3g033490	yellow	0	0.274	0.137	0.411	0.548	-0.137	-0.548	-0.411	-0.274
Cs_ont_4g000010	yellow	0.411	0.274	0.548	0	0.137	-0.137	-0.548	-0.411	-0.274
Cs_ont_4g000470	yellow	0.411	0.548	0.274	0.137	-0.137	0	-0.411	-0.274	-0.548
Cs_ont_4g000810	yellow	-0.137	0.274	0	0.411	0.548	0.137	-0.548	-0.411	-0.274
Cs_ont_4g001360	yellow	-0.137	0.274	0.137	0.548	0.411	0	-0.548	-0.411	-0.274
Cs_ont_4g001800	yellow	0.137	0	0.274	0.411	0.548	-0.137	-0.548	-0.411	-0.274
Cs_ont_4g002230	yellow	0	0.137	-0.137	0.548	0.274	0.411	-0.548	-0.274	-0.411
Cs_ont_4g002330	yellow	0	0.274	0.137	0.548	0.411	-0.137	-0.548	-0.411	-0.274
Cs_ont_4g002650	yellow	0.274	0.411	0.137	-0.137	0.548	0	-0.548	-0.274	-0.411
Cs_ont_4g002990	yellow	0.411	0.548	0.137	0.274	-0.137	0	-0.548	-0.274	-0.411
Cs_ont_4g003140	yellow	0.548	0.274	0.411	0.137	0	-0.137	-0.548	-0.411	-0.274
Cs_ont_4g003150	yellow	0.548	0.274	0.411	0.137	0	-0.137	-0.548	-0.411	-0.274
Cs_ont_4g003210	yellow	0.548	0.274	0.411	0.137	0	-0.137	-0.548	-0.411	-0.274
Cs_ont_4g003240	yellow	0.411	0.274	0.548	0.137	0	-0.137	-0.548	-0.411	-0.274
Cs_ont_4g003260	yellow	0.548	0.411	0.274	0.137	0	-0.137	-0.548	-0.411	-0.274
Cs_ont_4g003790	yellow	0.206	0.206	0.413	0.55	0	-0.275	-0.55	-0.413	-0.138
Cs_ont_4g004630	yellow	0	0.411	0.274	0.548	0.137	-0.137	-0.274	-0.411	-0.548
Cs_ont_4g004740	yellow	0.274	0.411	0.548	0.137	0	-0.137	-0.548	-0.411	-0.274
Cs_ont_4g005000	yellow	0.274	0.411	0.548	0.137	-0.137	0	-0.274	-0.548	-0.411
Cs_ont_4g005160	yellow	0.548	0.274	0.411	0	0.137	-0.137	-0.548	-0.274	-0.411
Cs_ont_4g005340	yellow	0.413	0.138	0.275	0	0.55	-0.138	-0.481	-0.481	-0.275
Cs_ont_4g005430	yellow	0	-0.411	-0.274	0.548	0.137	0.411	-0.548	0.274	-0.137
Cs_ont_4g005600	yellow	0.274	0	0.411	0.137	0.548	-0.137	-0.548	-0.411	-0.274
Cs_ont_4g005640	yellow	0.548	0.411	0.274	0	0.137	-0.137	-0.548	-0.274	-0.411
Cs_ont_4g006160	yellow	0.274	0.137	0.411	0.548	0	-0.137	-0.548	-0.274	-0.411
Cs_ont_4g007220	yellow	-0.137	0.137	0	0.548	0.274	0.411	-0.274	-0.411	-0.548
Cs_ont_4g007400	yellow	0.548	0.274	0.411	0.137	0	-0.137	-0.548	-0.411	-0.274
Cs_ont_4g007960	yellow	0.411	0.137	0.548	-0.137	0.274	0	-0.274	-0.411	-0.548
Cs_ont_4g008070	yellow	0.274	0.548	0.411	0	0.137	-0.137	-0.548	-0.411	-0.274
Cs_ont_4g008220	yellow	0.274	0.411	0.548	0	0.137	-0.137	-0.411	-0.274	-0.548
Cs_ont_4g008830	yellow	0.274	0.411	-0.137	0.548	0.137	0	-0.548	-0.274	-0.411
Cs_ont_4g008950	yellow	0.548	0.411	0.274	0.137	0	-0.137	-0.548	-0.411	-0.274
Cs_ont_4g009490	yellow	0.411	0.274	0.548	0	-0.137	0.137	-0.411	-0.274	-0.548
Cs_ont_4g009670	yellow	0.274	0.137	0.411	0	0.548	-0.274	-0.548	-0.411	-0.137
Cs_ont_4g011080	yellow	0.55	0.275	0.413	0.138	-0.0688	-0.0688	-0.55	-0.413	-0.275
Cs_ont_4g011290	yellow	0.274	0.411	0.548	0.137	0	-0.137	-0.548	-0.411	-0.274
Cs_ont_4g012320	yellow	0.548	0.274	0.411	0.137	0	-0.137	-0.548	-0.274	-0.411
Cs_ont_4g012470	yellow	0	0.137	0.274	0.548	0.411	-0.137	-0.548	-0.411	-0.274
Cs_ont_4g012480	yellow	0.139	0.418	0	0.557	-0.418	0.279	-0.418	-0.139	-0.418
Cs_ont_4g012830	yellow	-0.137	0.137	0.274	0.548	0	0.411	-0.548	-0.411	-0.274
Cs_ont_4g014280	yellow	0.274	0.411	0.548	0	0.137	-0.137	-0.548	-0.274	-0.411
Cs_ont_4g014300	yellow	0.411	0.274	0.548	0	0.137	-0.137	-0.548	-0.411	-0.274
Cs_ont_4g015140	yellow	0.411	0	0.274	0.548	-0.137	0.137	-0.548	-0.411	-0.274
Cs_ont_4g015190	yellow	0.137	0.274	0.411	-0.137	0.548	0	-0.548	-0.411	-0.274
Cs_ont_4g015540	yellow	0.274	0.548	0.411	0.137	0	-0.137	-0.274	-0.411	-0.548
Cs_ont_4g015860	yellow	0.411	0.274	0.548	0.137	-0.137	0	-0.548	-0.411	-0.274
Cs_ont_4g016140	yellow	0.274	0.548	0.411	-0.137	0.137	0	-0.411	-0.274	-0.548
Cs_ont_4g016150	yellow	0.548	0.411	0.274	0.137	0	-0.137	-0.548	-0.411	-0.274
Cs_ont_4g016630	yellow	0.548	0.274	0.411	0.137	0	-0.137	-0.548	-0.411	-0.274
Cs_ont_4g016840	yellow	0.411	0.548	0.137	0.274	-0.411	0	-0.548	-0.274	-0.137
Cs_ont_4g016890	yellow	0.274	0.411	0.548	0.137	0	-0.137	-0.548	-0.411	-0.274
Cs_ont_4g016900	yellow	0.274	0.411	0.548	0.137	0	-0.137	-0.548	-0.411	-0.274
Cs_ont_4g016940	yellow	0.411	0.274	0.548	0.137	-0.137	0	-0.548	-0.411	-0.274
Cs_ont_4g016990	yellow	-0.274	0.274	0.137	0.548	-0.411	0.411	-0.548	-0.137	0
Cs_ont_4g017090	yellow	0	0.275	0.413	0.55	-0.138	0.138	-0.55	-0.344	-0.344
Cs_ont_4g017220	yellow	0.279	0.557	0.139	0.418	-0.139	0	-0.418	-0.418	-0.418
Cs_ont_4g017520	yellow	-0.274	-0.137	0	0.274	0.411	0.548	-0.548	0.137	-0.411
Cs_ont_4g017590	yellow	0.274	0.137	0	-0.137	0.411	0.548	-0.274	-0.548	-0.411
Cs_ont_4g018700	yellow	0.137	0.548	0.274	0.411	0	-0.137	-0.548	-0.411	-0.274
Cs_ont_4g019130	yellow	0	0.137	0.548	0.274	0.411	-0.137	-0.548	-0.274	-0.411
Cs_ont_4g019420	yellow	0.137	0.274	0	-0.137	0.411	0.548	-0.548	-0.411	-0.274
Cs_ont_4g019720	yellow	0.274	0.411	0.548	0.137	0	-0.137	-0.548	-0.274	-0.411
Cs_ont_4g019810	yellow	0.411	0.548	0.274	0	0.137	-0.137	-0.548	-0.411	-0.274
Cs_ont_4g020280	yellow	0	0.137	0.411	0.548	0.274	-0.137	-0.548	-0.411	-0.274
Cs_ont_4g020310	yellow	0.137	-0.137	0.274	0.548	0.411	0	-0.274	-0.548	-0.411
Cs_ont_4g020390	yellow	0	0.137	-0.411	0.548	0.274	0.411	-0.548	-0.137	-0.274
Cs_ont_4g021210	yellow	0.548	0.274	0.137	0	-0.137	0.411	-0.548	-0.274	-0.411
Cs_ont_4g021730	yellow	0.274	0.411	0.137	0.548	-0.137	0	-0.548	-0.274	-0.411
Cs_ont_4g022570	yellow	0.548	0.411	0.274	0	0.137	-0.137	-0.411	-0.274	-0.548
Cs_ont_4g022720	yellow	0.274	0.137	0.548	0.411	0	-0.274	-0.137	-0.411	-0.548
Cs_ont_4g022740	yellow	0.274	0.411	0.137	0.548	-0.137	0	-0.548	-0.274	-0.411
Cs_ont_4g022840	yellow	0.274	0.411	0.548	0.137	0	-0.137	-0.548	-0.274	-0.411
Cs_ont_4g023110	yellow	0.411	0.274	0.548	0	0.137	-0.137	-0.548	-0.274	-0.411
Cs_ont_4g023360	yellow	0.274	0.411	0.137	0.548	0	-0.137	-0.274	-0.411	-0.548
Cs_ont_4g023370	yellow	0.274	0.548	0.137	0.411	-0.137	0	-0.274	-0.411	-0.548
Cs_ont_4g023500	yellow	0.137	0.411	0	0.548	0.274	-0.137	-0.548	-0.411	-0.274
Cs_ont_4g023960	yellow	-0.137	0	0.137	0.274	0.548	0.411	-0.548	-0.411	-0.274
Cs_ont_4g023990	yellow	-0.137	0	0.137	0.411	0.548	0.274	-0.274	-0.548	-0.411
Cs_ont_4g024260	yellow	0.137	-0.137	0.274	0.411	0.548	0	-0.411	-0.548	-0.274
Cs_ont_4g026040	yellow	0.137	-0.137	0	0.274	0.548	0.411	-0.548	-0.274	-0.411
Cs_ont_4g026380	yellow	0	0.274	-0.137	0.137	0.548	0.411	-0.548	-0.274	-0.411
Cs_ont_4g026790	yellow	0.274	0.137	0.411	0	0.548	-0.137	-0.411	-0.274	-0.548
Cs_ont_4g026990	yellow	0.137	0.274	0.411	0	0.548	-0.274	-0.548	-0.137	-0.411
Cs_ont_4g027000	yellow	0.411	0.548	0.137	0.274	0	-0.137	-0.548	-0.274	-0.411
Cs_ont_4g027610	yellow	0.411	0.274	0.548	0.137	0	-0.137	-0.548	-0.411	-0.274
Cs_ont_4g028450	yellow	0.274	0.548	0.411	0.137	0	-0.274	-0.548	-0.411	-0.137
Cs_ont_5g000740	yellow	0.411	0.274	0.548	0	0.137	-0.137	-0.548	-0.411	-0.274
Cs_ont_5g001450	yellow	0.137	0	-0.137	0.548	0.274	0.411	-0.274	-0.411	-0.548
Cs_ont_5g001980	yellow	0.274	0.137	-0.137	0.411	0	0.548	-0.548	-0.274	-0.411
Cs_ont_5g002080	yellow	0.411	0.548	0	0.274	0.137	-0.137	-0.274	-0.411	-0.548
Cs_ont_5g002760	yellow	0.137	0.274	0.548	0.411	0	-0.137	-0.548	-0.411	-0.274
Cs_ont_5g002790	yellow	0.548	0.411	0.274	0	0.137	-0.137	-0.411	-0.548	-0.274
Cs_ont_5g003160	yellow	0	0.411	0.274	0.548	0.137	-0.411	-0.548	-0.137	-0.274
Cs_ont_5g003600	yellow	0	0.274	0.137	0.411	0.548	-0.137	-0.548	-0.411	-0.274
Cs_ont_5g003790	yellow	0.137	-0.137	0.274	0.548	0.411	0	-0.548	-0.411	-0.274
Cs_ont_5g004050	yellow	0.274	0.137	0	0.411	0.548	-0.137	-0.548	-0.411	-0.274
Cs_ont_5g004090	yellow	0.411	0.548	0.274	0.137	0	-0.137	-0.274	-0.411	-0.548
Cs_ont_5g004130	yellow	0.411	0.548	0.274	0	0.137	-0.137	-0.548	-0.411	-0.274
Cs_ont_5g004680	yellow	0.411	0.274	0.548	0	0.137	-0.137	-0.548	-0.411	-0.274
Cs_ont_5g004950	yellow	0.411	0.548	0.137	0.274	0	-0.137	-0.548	-0.274	-0.411
Cs_ont_5g005120	yellow	0	0.137	0.411	0.274	0.548	-0.137	-0.548	-0.411	-0.274
Cs_ont_5g005390	yellow	0.411	0.548	0.274	0	0.137	-0.137	-0.411	-0.548	-0.274
Cs_ont_5g005450	yellow	0.411	0.548	0.274	0.137	-0.137	0	-0.548	-0.274	-0.411
Cs_ont_5g005530	yellow	0	-0.274	0.274	0.137	0.411	0.548	-0.548	-0.137	-0.411
Cs_ont_5g005590	yellow	0.137	0.274	0	-0.137	0.548	0.411	-0.411	-0.548	-0.274
Cs_ont_5g006010	yellow	0.413	0.55	0.275	0	-0.138	0.138	-0.55	-0.344	-0.344
Cs_ont_5g007080	yellow	0.274	0.411	0.137	0.548	-0.137	0	-0.548	-0.411	-0.274
Cs_ont_5g007200	yellow	0	0.137	-0.137	0.548	0.411	0.274	-0.548	-0.411	-0.274
Cs_ont_5g007590	yellow	-0.137	0	0.137	0.548	0.274	0.411	-0.548	-0.274	-0.411
Cs_ont_5g007940	yellow	-0.137	0.137	0	0.548	0.274	0.411	-0.548	-0.274	-0.411
Cs_ont_5g008300	yellow	0.274	0	0.548	0.411	0.137	-0.137	-0.548	-0.411	-0.274
Cs_ont_5g009120	yellow	0.137	-0.137	0	0.274	0.548	0.411	-0.548	-0.274	-0.411
Cs_ont_5g009240	yellow	0.411	0.548	0	0.137	0.274	-0.137	-0.411	-0.548	-0.274
Cs_ont_5g009650	yellow	0	0.548	0.137	0.411	-0.137	0.274	-0.548	-0.274	-0.411
Cs_ont_5g010020	yellow	0.411	0.137	0	-0.137	0.274	0.548	-0.411	-0.274	-0.548
Cs_ont_5g010120	yellow	0.274	0.411	0.548	0.137	-0.137	0	-0.548	-0.411	-0.274
Cs_ont_5g010800	yellow	0.411	0	0.274	0.137	0.548	-0.137	-0.411	-0.274	-0.548
Cs_ont_5g010940	yellow	0.274	0.548	0.411	0	0.137	-0.137	-0.548	-0.411	-0.274
Cs_ont_5g011340	yellow	0.274	0.548	0.137	0.411	0	-0.137	-0.548	-0.274	-0.411
Cs_ont_5g011990	yellow	0.274	0.411	0.548	-0.137	0.137	0	-0.548	-0.274	-0.411
Cs_ont_5g012440	yellow	0.411	0.274	0.548	0.137	-0.274	0	-0.548	-0.137	-0.411
Cs_ont_5g012470	yellow	0.548	0.274	0	0.137	0.411	-0.137	-0.548	-0.411	-0.274
Cs_ont_5g012480	yellow	0.548	0.274	0.411	0.137	0	-0.137	-0.548	-0.411	-0.274
Cs_ont_5g012820	yellow	0.411	0.137	0.274	0	0.548	-0.137	-0.548	-0.411	-0.274
Cs_ont_5g013020	yellow	0.411	0.548	0.274	0.137	0	-0.137	-0.274	-0.411	-0.548
Cs_ont_5g013240	yellow	0.274	0.548	0.411	0.137	0	-0.411	-0.548	-0.274	-0.137
Cs_ont_5g013300	yellow	0	-0.137	0.274	0.411	0.548	0.137	-0.548	-0.411	-0.274
Cs_ont_5g014090	yellow	0.137	0.274	0	0.548	0.411	-0.137	-0.411	-0.548	-0.274
Cs_ont_5g014100	yellow	0	-0.137	0.411	0.274	0.548	0.137	-0.411	-0.274	-0.548
Cs_ont_5g015730	yellow	0.411	0.274	0.548	0.137	0	-0.137	-0.548	-0.411	-0.274
Cs_ont_5g016290	yellow	0.557	0.279	0.418	0	0.139	-0.139	-0.418	-0.418	-0.418
Cs_ont_5g016430	yellow	0.274	0.137	0	0.548	0.411	-0.137	-0.548	-0.274	-0.411
Cs_ont_5g017050	yellow	0.548	0.274	0.411	0.137	0	-0.137	-0.548	-0.411	-0.274
Cs_ont_5g017220	yellow	0.274	-0.274	0	0.137	0.411	-0.137	-0.411	-0.548	0.548
Cs_ont_5g017420	yellow	0.548	0.137	0.411	0.274	-0.137	0	-0.548	-0.411	-0.274
Cs_ont_5g018050	yellow	0.411	0.274	0.548	0.137	-0.137	0	-0.411	-0.274	-0.548
Cs_ont_5g019520	yellow	0	0.411	0.548	0.274	0.137	-0.137	-0.548	-0.411	-0.274
Cs_ont_5g019790	yellow	0.274	0.411	0.548	-0.137	0.137	0	-0.548	-0.274	-0.411
Cs_ont_5g020090	yellow	0.55	0.275	0.413	0	0.138	-0.138	-0.275	-0.481	-0.481
Cs_ont_5g020960	yellow	0.411	0.548	0.274	0.137	0	-0.137	-0.548	-0.411	-0.274
Cs_ont_5g021010	yellow	0.274	0.411	0.137	0.548	-0.137	0	-0.548	-0.274	-0.411
Cs_ont_5g021100	yellow	0.411	0.137	0.548	0	0.274	-0.137	-0.548	-0.274	-0.411
Cs_ont_5g021250	yellow	0.411	0.548	0.274	0	0.137	-0.411	-0.548	-0.274	-0.137
Cs_ont_5g021320	yellow	0.274	0.411	0.548	0	0.137	-0.137	-0.548	-0.411	-0.274
Cs_ont_5g021330	yellow	0.137	0.274	0	0.548	0.411	-0.137	-0.411	-0.548	-0.274
Cs_ont_5g022670	yellow	-0.137	0.137	-0.274	0.411	0.274	0.548	-0.548	-0.411	0
Cs_ont_5g023520	yellow	0.274	0.411	-0.137	0	0.548	0.137	-0.411	-0.548	-0.274
Cs_ont_5g024200	yellow	0.274	0.411	0.548	-0.137	0.137	0	-0.548	-0.274	-0.411
Cs_ont_5g024310	yellow	0	0.137	-0.137	0.274	0.548	0.411	-0.548	-0.411	-0.274
Cs_ont_5g024450	yellow	0.275	0.138	0.413	0.55	-0.344	0	-0.55	-0.138	-0.344
Cs_ont_5g024590	yellow	0.411	0.137	0.274	0.548	0	-0.137	-0.548	-0.411	-0.274
Cs_ont_5g024960	yellow	0.411	0	0.548	0.137	0.274	-0.137	-0.274	-0.411	-0.548
Cs_ont_5g024970	yellow	0.137	0.274	0.548	0	-0.137	0.411	-0.411	-0.274	-0.548
Cs_ont_5g025100	yellow	0.548	0.137	0.274	0	0.411	-0.137	-0.274	-0.548	-0.411
Cs_ont_5g025680	yellow	0.548	0.274	0.411	-0.137	0.137	0	-0.274	-0.548	-0.411
Cs_ont_5g025740	yellow	0.411	0.548	0.274	0	0.137	-0.137	-0.548	-0.411	-0.274
Cs_ont_5g025770	yellow	0.548	0.274	0.411	0.137	0	-0.137	-0.548	-0.411	-0.274
Cs_ont_5g025810	yellow	0.274	-0.137	0	0.548	0.411	0.137	-0.548	-0.411	-0.274
Cs_ont_5g027400	yellow	0.548	0.411	0	0.274	-0.137	0.137	-0.548	-0.274	-0.411
Cs_ont_5g027420	yellow	0.411	0.274	0.548	0.137	0	-0.137	-0.548	-0.411	-0.274
Cs_ont_5g027620	yellow	0.274	0	0.411	0.137	0.548	-0.411	-0.548	-0.274	-0.137
Cs_ont_5g028110	yellow	0.137	0.411	0.274	0.548	-0.137	0	-0.548	-0.411	-0.274
Cs_ont_5g028150	yellow	0.411	0.274	0.548	0.137	-0.137	0	-0.548	-0.411	-0.274
Cs_ont_5g028190	yellow	0.548	0.411	0.274	0.137	0	-0.137	-0.548	-0.411	-0.274
Cs_ont_5g028200	yellow	0.548	0.411	0.274	0.137	0	-0.137	-0.548	-0.411	-0.274
Cs_ont_5g030210	yellow	0.274	0.548	0.411	0	0.137	-0.137	-0.548	-0.411	-0.274
Cs_ont_5g030270	yellow	-0.137	0.137	0.274	0.411	0.548	0	-0.274	-0.548	-0.411
Cs_ont_5g030290	yellow	0	0.137	-0.137	0.411	0.548	0.274	-0.548	-0.274	-0.411
Cs_ont_5g030500	yellow	0.411	0.137	0.274	0	0.548	-0.137	-0.548	-0.411	-0.274
Cs_ont_5g030800	yellow	0.274	0.548	0.137	0.411	0	-0.137	-0.548	-0.411	-0.274
Cs_ont_5g031160	yellow	0.411	0.548	0.137	0.274	0	-0.274	-0.548	-0.137	-0.411
Cs_ont_5g031840	yellow	-0.137	0.274	0	0.548	0.411	0.137	-0.548	-0.411	-0.274
Cs_ont_5g031850	yellow	-0.137	0.137	0	0.548	0.411	0.274	-0.548	-0.411	-0.274
Cs_ont_5g031860	yellow	-0.137	0.137	-0.274	0.548	0.411	0.274	-0.548	-0.411	0
Cs_ont_5g031900	yellow	-0.137	0.274	0	0.548	0.411	0.137	-0.548	-0.411	-0.274
Cs_ont_5g033950	yellow	0.411	0.548	0.274	0.137	0	-0.137	-0.274	-0.548	-0.411
Cs_ont_5g034270	yellow	0.137	-0.137	0	0.411	0.548	0.274	-0.548	-0.274	-0.411
Cs_ont_5g034530	yellow	0.548	0.411	0.137	0.274	0	-0.137	-0.548	-0.411	-0.274
Cs_ont_5g034550	yellow	0.548	0.274	0.411	0.137	0	-0.137	-0.548	-0.411	-0.274
Cs_ont_5g035280	yellow	0.137	0.548	0.274	0.411	0	-0.137	-0.548	-0.411	-0.274
Cs_ont_5g035690	yellow	0.411	0.274	-0.411	0.137	0.548	0	-0.548	-0.137	-0.274
Cs_ont_5g035710	yellow	0.411	0.274	-0.137	0.137	0.548	0	-0.548	-0.411	-0.274
Cs_ont_5g036140	yellow	0.274	0.548	0.411	0	0.137	-0.137	-0.274	-0.411	-0.548
Cs_ont_5g036200	yellow	-0.137	0.137	-0.274	0.274	0.411	0.548	-0.548	0	-0.411
Cs_ont_5g036500	yellow	-0.137	0.137	0	0.274	0.548	0.411	-0.548	-0.411	-0.274
Cs_ont_5g036840	yellow	-0.137	0	0.137	0.411	0.274	0.548	-0.548	-0.411	-0.274
Cs_ont_5g036850	yellow	-0.137	0	-0.274	0.411	0.548	0.137	0.274	-0.411	-0.548
Cs_ont_5g036870	yellow	0.411	0.548	0.137	0.274	-0.137	0	-0.548	-0.274	-0.411
Cs_ont_5g037210	yellow	-0.137	0.137	0	0.548	0.274	0.411	-0.274	-0.411	-0.548
Cs_ont_5g038280	yellow	0.274	0.548	0.411	0	0.137	-0.137	-0.548	-0.274	-0.411
Cs_ont_5g038300	yellow	0.274	0.548	0.411	0	0.137	-0.137	-0.548	-0.411	-0.274
Cs_ont_5g039130	yellow	0.411	0.137	0.274	0	0.548	-0.274	-0.548	-0.411	-0.137
Cs_ont_5g039490	yellow	0.274	0.137	0.411	0	0.548	-0.137	-0.411	-0.548	-0.274
Cs_ont_5g039500	yellow	0.411	0.137	0.274	0	0.548	-0.137	-0.274	-0.548	-0.411
Cs_ont_5g039520	yellow	0.411	0.548	0.274	0	0.137	-0.137	-0.548	-0.411	-0.274
Cs_ont_5g039890	yellow	0.411	0.548	0.137	0.274	0	-0.274	-0.548	-0.137	-0.411
Cs_ont_5g039940	yellow	0.411	0.548	0.274	0.137	0	-0.137	-0.274	-0.411	-0.548
Cs_ont_5g040040	yellow	0.137	0.548	0.274	0.411	0	-0.137	-0.274	-0.411	-0.548
Cs_ont_5g040670	yellow	0	-0.137	0.137	0.548	0.411	0.274	-0.548	-0.411	-0.274
Cs_ont_5g040710	yellow	0.411	0.274	0.548	0.137	-0.137	0	-0.548	-0.411	-0.274
Cs_ont_5g040720	yellow	0.137	0.274	0	0.411	0.548	-0.137	-0.274	-0.411	-0.548
Cs_ont_5g040750	yellow	0.411	0	0.137	0.274	0.548	-0.137	-0.548	-0.411	-0.274
Cs_ont_5g041640	yellow	0.274	0.137	-0.411	0	0.411	0.548	-0.274	-0.137	-0.548
Cs_ont_5g042000	yellow	0	-0.137	0.137	0.548	0.411	0.274	-0.548	-0.411	-0.274
Cs_ont_5g042040	yellow	0.274	0.137	-0.137	0.411	0.548	0	-0.411	-0.274	-0.548
Cs_ont_5g042280	yellow	0	-0.411	0.274	0.411	0.137	0.548	-0.137	-0.274	-0.548
Cs_ont_5g042720	yellow	0	0.274	0.411	0.548	-0.137	0.137	-0.548	-0.411	-0.274
Cs_ont_5g042790	yellow	-0.411	0	-0.274	0.548	0.411	0.274	-0.548	0.137	-0.137
Cs_ont_5g043010	yellow	0	0.137	0.274	0.411	-0.137	0.548	-0.411	-0.274	-0.548
Cs_ont_5g043300	yellow	0.548	-0.137	0	0.411	0.137	0.274	-0.274	-0.548	-0.411
Cs_ont_5g043860	yellow	-0.137	0	0.411	0.137	0.548	0.274	-0.548	-0.411	-0.274
Cs_ont_5g043900	yellow	0.274	0.411	0	0.137	0.548	-0.137	-0.411	-0.548	-0.274
Cs_ont_5g044050	yellow	0	0.137	-0.137	0.411	0.548	0.274	-0.548	-0.411	-0.274
Cs_ont_5g044160	yellow	0.411	0.548	0.274	0.137	0	-0.137	-0.548	-0.411	-0.274
Cs_ont_5g045510	yellow	0.411	0.548	0.274	0.137	-0.137	0	-0.548	-0.411	-0.274
Cs_ont_5g045910	yellow	0.548	0.274	0.411	0	0.137	-0.137	-0.411	-0.548	-0.274
Cs_ont_5g046200	yellow	0.137	-0.137	0.411	0.274	0.548	0	-0.411	-0.548	-0.274
Cs_ont_5g046400	yellow	0.411	0.274	0.137	0.548	0	-0.137	-0.274	-0.548	-0.411
Cs_ont_5g046500	yellow	-0.274	0.137	0	0.411	0.548	0.274	-0.548	-0.411	-0.137
Cs_ont_5g047480	yellow	0.274	0.411	0.548	0.137	-0.137	0	-0.548	-0.274	-0.411
Cs_ont_5g047550	yellow	0.274	0.411	0.548	0.137	-0.137	0	-0.548	-0.274	-0.411
Cs_ont_5g048210	yellow	0.274	0.137	0.411	-0.137	0.548	0	-0.274	-0.411	-0.548
Cs_ont_5g048450	yellow	0.274	0.137	0.411	-0.137	0.548	0	-0.274	-0.411	-0.548
Cs_ont_5g049660	yellow	0.274	0.548	0.137	0.411	-0.137	0	-0.274	-0.411	-0.548
Cs_ont_5g049910	yellow	0.411	0.548	0.137	-0.137	0	0.274	-0.548	-0.411	-0.274
Cs_ont_5g050270	yellow	0	0.137	0.548	0.411	0.274	-0.137	-0.548	-0.411	-0.274
Cs_ont_6g000100	yellow	0.548	0.411	0.274	0	-0.137	0.137	-0.548	-0.274	-0.411
Cs_ont_6g000180	yellow	0.137	0.274	0.548	0	0.411	-0.137	-0.548	-0.411	-0.274
Cs_ont_6g000270	yellow	0.137	0	0.274	0.548	-0.274	0.411	-0.548	-0.137	-0.411
Cs_ont_6g001330	yellow	0	-0.137	0.274	0.137	0.411	0.548	-0.548	-0.274	-0.411
Cs_ont_6g001890	yellow	0.411	0.548	0.274	0.137	0	-0.411	-0.548	-0.274	-0.137
Cs_ont_6g002730	yellow	0.411	0.274	0.548	0	0.137	-0.137	-0.548	-0.411	-0.274
Cs_ont_6g002860	yellow	0.274	0.411	0.548	0.137	0	-0.137	-0.548	-0.411	-0.274
Cs_ont_6g002870	yellow	0.411	0.548	0.274	0	0.137	-0.137	-0.548	-0.411	-0.274
Cs_ont_6g003540	yellow	0.137	0.274	0.548	0	0.411	-0.137	-0.548	-0.274	-0.411
Cs_ont_6g003730	yellow	0.274	0.411	0	0.548	0.137	-0.274	-0.548	-0.411	-0.137
Cs_ont_6g003820	yellow	0.274	0.548	0.137	0.411	0	-0.411	-0.548	-0.137	-0.274
Cs_ont_6g004090	yellow	0.274	0.548	0.411	0	0.137	-0.137	-0.548	-0.274	-0.411
Cs_ont_6g004370	yellow	0.274	0.137	0.411	0	0.548	-0.137	-0.548	-0.411	-0.274
Cs_ont_6g004600	yellow	0.548	0.411	0.274	0	0.137	-0.137	-0.548	-0.411	-0.274
Cs_ont_6g005180	yellow	0.411	0.274	0.548	0.137	0	-0.137	-0.548	-0.411	-0.274
Cs_ont_6g005610	yellow	0.548	0.274	0.411	0.137	0	-0.137	-0.548	-0.411	-0.274
Cs_ont_6g005750	yellow	0.548	0.274	0.411	-0.137	0.137	0	-0.548	-0.274	-0.411
Cs_ont_6g005980	yellow	0.411	0.548	0.274	0	0.137	-0.137	-0.548	-0.411	-0.274
Cs_ont_6g006790	yellow	0.345	0.552	-0.069	0.345	-0.069	0.138	-0.414	-0.552	-0.276
Cs_ont_6g006810	yellow	0.411	0.274	0.548	0.137	-0.137	0	-0.548	-0.274	-0.411
Cs_ont_6g007000	yellow	0.137	0.274	0.411	-0.137	0.548	0	-0.548	-0.411	-0.274
Cs_ont_6g007010	yellow	0.137	0.274	0.548	-0.137	0.411	0	-0.548	-0.274	-0.411
Cs_ont_6g007120	yellow	0	-0.137	0.274	0.411	0.548	0.137	-0.274	-0.548	-0.411
Cs_ont_6g007400	yellow	0	0.274	0.411	-0.137	0.548	0.137	-0.548	-0.411	-0.274
Cs_ont_6g007430	yellow	-0.137	0	0.137	0.411	0.548	0.274	-0.274	-0.548	-0.411
Cs_ont_6g007590	yellow	0.137	0.274	0	0.548	-0.137	0.411	-0.411	-0.274	-0.548
Cs_ont_6g008110	yellow	0.274	0.137	0.548	0.411	0	-0.274	-0.548	-0.411	-0.137
Cs_ont_6g008230	yellow	0.274	0.411	0.548	0	0.137	-0.137	-0.411	-0.548	-0.274
Cs_ont_6g009050	yellow	-0.274	-0.411	-0.137	0.548	0.137	0.411	-0.548	0.274	0
Cs_ont_6g009220	yellow	0.137	0	0.274	-0.137	0.411	0.548	-0.548	-0.411	-0.274
Cs_ont_6g009360	yellow	0.274	0.411	0.137	-0.274	0.548	0	-0.548	-0.411	-0.137
Cs_ont_6g010600	yellow	0.411	0.548	0.274	0.137	-0.137	0	-0.548	-0.274	-0.411
Cs_ont_6g010640	yellow	0.274	-0.137	0.137	0.548	0.411	0	-0.548	-0.274	-0.411
Cs_ont_6g010670	yellow	0.411	0.274	0.137	0	0.548	-0.137	-0.548	-0.274	-0.411
Cs_ont_6g011090	yellow	0	0.548	-0.137	0.137	0.411	0.274	-0.274	-0.548	-0.411
Cs_ont_6g011170	yellow	0.411	0.274	0.548	0	0.137	-0.137	-0.548	-0.411	-0.274
Cs_ont_6g011310	yellow	0.137	0.274	0	0.411	0.548	-0.274	-0.137	-0.411	-0.548
Cs_ont_6g011650	yellow	0.411	0.274	0.137	0.548	0	-0.137	-0.548	-0.274	-0.411
Cs_ont_6g011850	yellow	0.548	0.137	-0.411	0.411	-0.274	0.274	-0.137	-0.548	0
Cs_ont_6g011860	yellow	0.274	0.411	0.137	0.548	0	-0.137	-0.548	-0.411	-0.274
Cs_ont_6g011880	yellow	0.274	0	-0.137	0.548	0.411	0.137	-0.548	-0.411	-0.274
Cs_ont_6g012460	yellow	-0.137	-0.274	0.137	0.411	0.548	0.274	-0.548	-0.411	0
Cs_ont_6g012720	yellow	0	0.411	-0.137	0.548	0.274	0.137	-0.274	-0.411	-0.548
Cs_ont_6g012890	yellow	0.137	0.548	0.411	0	0.274	-0.137	-0.548	-0.411	-0.274
Cs_ont_6g013580	yellow	-0.137	0	0.274	0.548	0.137	0.411	-0.548	-0.411	-0.274
Cs_ont_6g013920	yellow	0.274	0.548	0.411	0.137	-0.137	0	-0.548	-0.411	-0.274
Cs_ont_6g014370	yellow	-0.137	0.548	0.411	0.274	0	0.137	-0.548	-0.274	-0.411
Cs_ont_6g014940	yellow	0.274	0.411	0.548	0.137	0	-0.137	-0.548	-0.411	-0.274
Cs_ont_6g014990	yellow	0.274	0.548	0.137	0.411	-0.137	0	-0.548	-0.274	-0.411
Cs_ont_6g015270	yellow	-0.137	0	0.411	0.548	0.137	0.274	-0.411	-0.274	-0.548
Cs_ont_6g015300	yellow	0.137	-0.274	0	0.411	0.548	0.274	-0.137	-0.548	-0.411
Cs_ont_6g015360	yellow	0.137	0.274	0.548	0.411	0	-0.137	-0.548	-0.274	-0.411
Cs_ont_6g015820	yellow	0	0.139	0.279	0.418	0.557	-0.418	-0.418	-0.418	-0.139
Cs_ont_6g016590	yellow	0.137	0.274	0.411	-0.137	0.548	0	-0.411	-0.548	-0.274
Cs_ont_6g016720	yellow	0.411	0.548	0.137	0.274	0	-0.137	-0.548	-0.274	-0.411
Cs_ont_6g016730	yellow	0	0.274	-0.137	0.411	0.548	0.137	-0.548	-0.411	-0.274
Cs_ont_6g016760	yellow	0.548	0.274	0.411	0.137	0	-0.137	-0.548	-0.411	-0.274
Cs_ont_6g016860	yellow	0.548	0.411	0.274	0.137	0	-0.137	-0.548	-0.411	-0.274
Cs_ont_6g017510	yellow	0	0.411	0.137	0.548	0.274	-0.137	-0.548	-0.411	-0.274
Cs_ont_6g018490	yellow	0.411	0.548	0.274	0.137	0	-0.274	-0.548	-0.411	-0.137
Cs_ont_6g019050	yellow	0.274	0.411	-0.137	0.548	0	0.137	-0.274	-0.548	-0.411
Cs_ont_6g019260	yellow	0.137	-0.137	0.274	0.548	0.411	0	-0.548	-0.274	-0.411
Cs_ont_6g019320	yellow	0.411	0.137	0.548	0	0.274	-0.137	-0.548	-0.411	-0.274
Cs_ont_6g019530	yellow	0.137	-0.137	0.411	0	0.548	0.274	-0.548	-0.274	-0.411
Cs_ont_6g019610	yellow	0	0.411	0.548	0.274	-0.137	0.137	-0.411	-0.274	-0.548
Cs_ont_6g019700	yellow	0.137	0.274	0.411	0.548	0	-0.137	-0.548	-0.411	-0.274
Cs_ont_6g020100	yellow	-0.137	0.137	0	0.548	0.411	0.274	-0.274	-0.411	-0.548
Cs_ont_6g020550	yellow	0.411	0.548	0.274	0.137	-0.137	0	-0.274	-0.548	-0.411
Cs_ont_6g020600	yellow	0.411	0.274	0.548	-0.137	0.137	0	-0.548	-0.274	-0.411
Cs_ont_6g020620	yellow	0.274	0.137	0.548	0	0.411	-0.137	-0.548	-0.274	-0.411
Cs_ont_6g020660	yellow	0.411	0.274	0.548	0	0.137	-0.137	-0.548	-0.274	-0.411
Cs_ont_6g021330	yellow	0.274	0.411	0.548	0.137	0	-0.137	-0.548	-0.274	-0.411
Cs_ont_6g021740	yellow	0.411	0.548	0.274	0.137	0	-0.274	-0.548	-0.411	-0.137
Cs_ont_6g021790	yellow	0.274	0.548	0.137	0	0.411	-0.137	-0.411	-0.548	-0.274
Cs_ont_6g022370	yellow	0	0.137	0.411	0.274	0.548	-0.274	-0.137	-0.548	-0.411
Cs_ont_6g023840	yellow	0.411	0.548	0.137	0.274	0	-0.137	-0.548	-0.274	-0.411
Cs_ont_6g023950	yellow	0.274	0.548	0.411	0.137	0	-0.137	-0.274	-0.548	-0.411
Cs_ont_6g024210	yellow	0.548	0.411	0.274	0.137	0	-0.137	-0.548	-0.274	-0.411
Cs_ont_6g024340	yellow	0.137	-0.411	0.274	0.548	0.411	0	-0.548	-0.137	-0.274
Cs_ont_6g024400	yellow	-0.137	0.274	0.137	0.548	0.411	0	-0.548	-0.411	-0.274
Cs_ont_6g025150	yellow	0.274	0.548	0.137	0.411	0	-0.137	-0.548	-0.274	-0.411
Cs_ont_6g026400	yellow	0	-0.137	0.137	0.548	0.411	0.274	-0.274	-0.548	-0.411
Cs_ont_7g001360	yellow	0.274	0.411	0.137	0.548	0	-0.274	-0.548	-0.137	-0.411
Cs_ont_7g001740	yellow	0.411	0.548	0.274	-0.137	0.137	0	-0.548	-0.274	-0.411
Cs_ont_7g002010	yellow	0.274	0.548	0.411	0.137	0	-0.137	-0.548	-0.411	-0.274
Cs_ont_7g002030	yellow	0.274	0.548	0.137	0.411	0	-0.137	-0.548	-0.411	-0.274
Cs_ont_7g002350	yellow	0.137	0.548	-0.137	0.274	0.411	-0.274	0	-0.548	-0.411
Cs_ont_7g002520	yellow	-0.137	0	0.548	0.274	0.411	0.137	-0.548	-0.411	-0.274
Cs_ont_7g003130	yellow	-0.137	0.137	0	0.548	0.411	0.274	-0.548	-0.274	-0.411
Cs_ont_7g003250	yellow	0	0.411	0.137	0.274	0.548	-0.137	-0.548	-0.411	-0.274
Cs_ont_7g003830	yellow	-0.411	0.137	0	0.274	0.411	0.548	-0.548	-0.274	-0.137
Cs_ont_7g003880	yellow	-0.274	0	0.137	0.274	0.411	0.548	-0.548	-0.411	-0.137
Cs_ont_7g004240	yellow	0.274	0.411	0.548	0.137	0	-0.137	-0.548	-0.411	-0.274
Cs_ont_7g004470	yellow	0.137	0.274	0.548	0.411	0	-0.137	-0.548	-0.274	-0.411
Cs_ont_7g004500	yellow	0.411	0.274	0.548	0.137	0	-0.137	-0.548	-0.411	-0.274
Cs_ont_7g004590	yellow	-0.137	-0.274	0.274	0.411	0.548	0.137	-0.548	-0.411	0
Cs_ont_7g005520	yellow	0	-0.137	0.274	0.411	0.548	0.137	-0.548	-0.274	-0.411
Cs_ont_7g005590	yellow	0.411	0.548	0.274	0.137	0	-0.137	-0.411	-0.274	-0.548
Cs_ont_7g005620	yellow	0.275	0	0.138	0.55	0.413	-0.138	-0.481	-0.481	-0.275
Cs_ont_7g005690	yellow	0.274	0.411	0.548	0.137	0	-0.137	-0.548	-0.274	-0.411
Cs_ont_7g005880	yellow	0.411	0.274	0.548	0	0.137	-0.137	-0.548	-0.411	-0.274
Cs_ont_7g005910	yellow	0.548	0.274	0.411	0.137	0	-0.137	-0.548	-0.411	-0.274
Cs_ont_7g005990	yellow	0.411	0.274	0.548	0.137	0	-0.137	-0.548	-0.411	-0.274
Cs_ont_7g006040	yellow	0.411	0.274	0.548	0.137	0	-0.137	-0.548	-0.411	-0.274
Cs_ont_7g006100	yellow	0.548	0.274	0.411	0.137	0	-0.137	-0.548	-0.411	-0.274
Cs_ont_7g006530	yellow	0.411	0.274	0.548	0.137	0	-0.137	-0.548	-0.411	-0.274
Cs_ont_7g006650	yellow	0	0.137	0.274	0.411	0.548	-0.137	-0.548	-0.411	-0.274
Cs_ont_7g007030	yellow	0.274	-0.137	0	0.411	0.548	0.137	-0.548	-0.274	-0.411
Cs_ont_7g008210	yellow	0.137	-0.137	0.411	0.274	0.548	0	-0.548	-0.274	-0.411
Cs_ont_7g008680	yellow	-0.137	-0.274	0.274	0.137	0.548	0.411	-0.548	-0.411	0
Cs_ont_7g008800	yellow	0.137	0	0.411	0.274	-0.274	0.548	-0.548	-0.137	-0.411
Cs_ont_7g009480	yellow	0	-0.137	0.274	0.548	0.411	0.137	-0.411	-0.274	-0.548
Cs_ont_7g009950	yellow	0.411	0.274	0.548	-0.137	0.137	0	-0.548	-0.274	-0.411
Cs_ont_7g010200	yellow	0.274	-0.137	0	0.411	0.548	0.137	-0.548	-0.411	-0.274
Cs_ont_7g011320	yellow	0.411	0.548	-0.137	0.274	0	0.137	-0.411	-0.274	-0.548
Cs_ont_7g011380	yellow	0.548	0.411	0.274	0.137	0	-0.411	-0.548	-0.137	-0.274
Cs_ont_7g011460	yellow	0.274	0.548	0.411	0.137	0	-0.137	-0.411	-0.274	-0.548
Cs_ont_7g011500	yellow	0.548	0.411	0.274	0.137	0	-0.137	-0.548	-0.411	-0.274
Cs_ont_7g011510	yellow	0.411	0.274	0.548	0.137	0	-0.137	-0.548	-0.411	-0.274
Cs_ont_7g011580	yellow	-0.137	0	0.137	0.411	0.548	0.274	-0.548	-0.411	-0.274
Cs_ont_7g011840	yellow	0	0.137	0.274	0.548	0.411	-0.137	-0.548	-0.274	-0.411
Cs_ont_7g012590	yellow	0.411	0.548	0.274	0.137	0	-0.137	-0.548	-0.411	-0.274
Cs_ont_7g013360	yellow	0.411	0.548	0.137	0.274	0	-0.137	-0.548	-0.411	-0.274
Cs_ont_7g013550	yellow	0.411	0.274	0.548	0.137	-0.137	0	-0.548	-0.411	-0.274
Cs_ont_7g013670	yellow	0.137	-0.137	0	0.274	0.411	0.548	-0.411	-0.274	-0.548
Cs_ont_7g014520	yellow	0.548	0.411	0	0.137	-0.137	0.274	-0.548	-0.274	-0.411
Cs_ont_7g014770	yellow	0.274	0.411	0.548	0.137	0	-0.274	-0.548	-0.411	-0.137
Cs_ont_7g014820	yellow	0.276	0.483	0.483	-0.138	0.069	0.069	-0.552	-0.276	-0.414
Cs_ont_7g015430	yellow	0.137	0	0.274	-0.137	0.548	0.411	-0.274	-0.411	-0.548
Cs_ont_7g015660	yellow	-0.137	0	0.137	0.274	0.548	0.411	-0.548	-0.411	-0.274
Cs_ont_7g015720	yellow	0.137	0.274	0	-0.137	0.548	0.411	-0.548	-0.274	-0.411
Cs_ont_7g016230	yellow	0.411	0.137	0	0.548	0.274	-0.137	-0.548	-0.274	-0.411
Cs_ont_7g016240	yellow	0.548	0.411	0.137	0.274	0	-0.274	-0.548	-0.411	-0.137
Cs_ont_7g016340	yellow	0.137	0	0.274	0.548	0.411	-0.137	-0.548	-0.274	-0.411
Cs_ont_7g016350	yellow	0.274	0.137	0	0.548	0.411	-0.137	-0.548	-0.411	-0.274
Cs_ont_7g016390	yellow	0.274	0	0.137	0.548	0.411	-0.137	-0.548	-0.411	-0.274
Cs_ont_7g016690	yellow	0.411	0.548	0.274	0.137	0	-0.137	-0.548	-0.274	-0.411
Cs_ont_7g017160	yellow	0.274	0.137	0	-0.137	0.548	0.411	-0.411	-0.274	-0.548
Cs_ont_7g017190	yellow	0	0.137	-0.137	0.548	0.274	0.411	-0.548	-0.411	-0.274
Cs_ont_7g017500	yellow	0.411	0.274	0.548	0.137	0	-0.137	-0.548	-0.411	-0.274
Cs_ont_7g017510	yellow	0.411	0.274	0.548	0.137	0	-0.137	-0.548	-0.411	-0.274
Cs_ont_7g017540	yellow	0.411	0.274	0.548	0.137	0	-0.137	-0.548	-0.411	-0.274
Cs_ont_7g018060	yellow	0.137	0.411	0.548	-0.137	0.274	0	-0.411	-0.548	-0.274
Cs_ont_7g018660	yellow	0.411	0.137	0.274	0	0.548	-0.137	-0.548	-0.411	-0.274
Cs_ont_7g018720	yellow	0.274	0	0.137	0.548	0.411	-0.137	-0.548	-0.411	-0.274
Cs_ont_7g018820	yellow	0.137	0.274	0.411	0.548	-0.137	0	-0.274	-0.548	-0.411
Cs_ont_7g018970	yellow	0	0.137	0.274	0.548	0.411	-0.137	-0.548	-0.274	-0.411
Cs_ont_7g019230	yellow	0.137	-0.137	0.274	0.548	0.411	0	-0.548	-0.274	-0.411
Cs_ont_7g019350	yellow	0.411	0.137	0.548	0	0.274	-0.137	-0.548	-0.274	-0.411
Cs_ont_7g019420	yellow	0.548	0.411	0.274	-0.137	0.137	0	-0.411	-0.274	-0.548
Cs_ont_7g019610	yellow	0.274	0.137	0.548	-0.137	0	0.411	-0.548	-0.411	-0.274
Cs_ont_7g019960	yellow	0.411	0.548	0.274	0.137	0	-0.137	-0.411	-0.274	-0.548
Cs_ont_7g020040	yellow	-0.137	0	0.274	0.137	0.411	0.548	-0.548	-0.411	-0.274
Cs_ont_7g020240	yellow	0.411	0.137	0.548	0.274	0	-0.137	-0.548	-0.274	-0.411
Cs_ont_7g020320	yellow	0.274	0.411	0.137	-0.137	0.548	0	-0.411	-0.548	-0.274
Cs_ont_7g020600	yellow	0.411	0.137	0.548	0.274	0	-0.274	-0.548	-0.411	-0.137
Cs_ont_7g020670	yellow	0.274	0.411	0.548	0	0.137	-0.137	-0.548	-0.274	-0.411
Cs_ont_7g020980	yellow	0	-0.137	0.137	0.411	0.548	0.274	-0.548	-0.274	-0.411
Cs_ont_7g022050	yellow	0.411	0.274	0.548	0.137	0	-0.137	-0.548	-0.411	-0.274
Cs_ont_7g022110	yellow	0.411	0.548	0.274	0.137	-0.137	0	-0.548	-0.274	-0.411
Cs_ont_7g022160	yellow	0.411	0.548	0.274	0.137	-0.137	0	-0.548	-0.274	-0.411
Cs_ont_7g022270	yellow	0.274	0.411	0.548	0.137	0	-0.137	-0.411	-0.548	-0.274
Cs_ont_7g022390	yellow	0.274	0.548	0.411	0.137	0	-0.137	-0.548	-0.274	-0.411
Cs_ont_7g022960	yellow	0	0.274	0.137	0.548	0.411	-0.137	-0.548	-0.274	-0.411
Cs_ont_7g023400	yellow	0.137	-0.274	0	0.274	0.411	0.548	-0.548	-0.137	-0.411
Cs_ont_7g023610	yellow	0.548	0.411	0.274	0.137	-0.137	0	-0.411	-0.548	-0.274
Cs_ont_7g023670	yellow	0.274	0.548	-0.137	0.411	0	0.137	-0.411	-0.274	-0.548
Cs_ont_7g023930	yellow	0.274	0.548	0.411	0.137	0	-0.137	-0.274	-0.548	-0.411
Cs_ont_7g023980	yellow	0.548	0.274	0.411	0.137	0	-0.137	-0.548	-0.411	-0.274
Cs_ont_7g024020	yellow	0.411	0.548	0.274	0.137	0	-0.137	-0.548	-0.274	-0.411
Cs_ont_7g024050	yellow	0.411	0.548	0.274	0	0.137	-0.137	-0.548	-0.411	-0.274
Cs_ont_7g024400	yellow	0	-0.274	0.137	0.548	0.411	0.274	-0.411	-0.137	-0.548
Cs_ont_7g025070	yellow	0	-0.137	0.137	0.411	0.274	0.548	-0.548	-0.411	-0.274
Cs_ont_7g025290	yellow	0.411	0.548	0.137	-0.274	0.274	-0.137	-0.548	-0.411	0
Cs_ont_7g025370	yellow	0.411	0.137	0.548	0.274	-0.137	0	-0.274	-0.411	-0.548
Cs_ont_7g025420	yellow	-0.274	-0.137	0.411	0.137	0.548	0.274	-0.548	0	-0.411
Cs_ont_7g025560	yellow	0.411	0	0.274	-0.137	0.548	0.137	-0.274	-0.411	-0.548
Cs_ont_7g025640	yellow	0.137	0.411	0.274	0	0.548	-0.137	-0.411	-0.548	-0.274
Cs_ont_7g026930	yellow	0.413	0.55	0.138	0.275	-0.138	0	-0.275	-0.481	-0.481
Cs_ont_7g027240	yellow	0	0.274	0.411	0.548	0.137	-0.137	-0.548	-0.411	-0.274
Cs_ont_7g027740	yellow	0	-0.137	0.411	0.548	0.137	0.274	-0.548	-0.411	-0.274
Cs_ont_7g028260	yellow	0.137	0.411	0.274	0.548	0	-0.137	-0.548	-0.274	-0.411
Cs_ont_7g028730	yellow	0.411	0.548	0.274	0	0.137	-0.137	-0.548	-0.411	-0.274
Cs_ont_7g028810	yellow	0.274	0.548	0.411	0.137	-0.137	0	-0.548	-0.274	-0.411
Cs_ont_7g028870	yellow	0.411	0.548	0.137	0.274	-0.137	0	-0.548	-0.274	-0.411
Cs_ont_7g029160	yellow	0.137	0.411	0.274	0	0.548	-0.137	-0.548	-0.274	-0.411
Cs_ont_7g029360	yellow	0.418	0.279	0	0.557	-0.139	0.139	-0.418	-0.418	-0.418
Cs_ont_8g000150	yellow	0.137	0.274	0.548	0.411	0	-0.137	-0.411	-0.274	-0.548
Cs_ont_8g000480	yellow	-0.274	0	0.137	0.274	0.411	0.548	-0.548	-0.137	-0.411
Cs_ont_8g000960	yellow	0.274	0.411	0.548	0.137	0	-0.137	-0.548	-0.274	-0.411
Cs_ont_8g001210	yellow	0.274	0.548	0.411	0.137	-0.137	0	-0.274	-0.411	-0.548
Cs_ont_8g001220	yellow	0.274	0.137	-0.137	0.411	0.548	0	-0.411	-0.548	-0.274
Cs_ont_8g001590	yellow	0.137	-0.137	-0.274	0.548	0.411	0.274	-0.548	-0.411	0
Cs_ont_8g001600	yellow	-0.137	0.137	0	0.548	0.274	0.411	-0.274	-0.411	-0.548
Cs_ont_8g002300	yellow	0.274	0.137	0	-0.137	0.411	0.548	-0.548	-0.411	-0.274
Cs_ont_8g002350	yellow	0.137	0.274	0	0.411	0.548	-0.137	-0.548	-0.411	-0.274
Cs_ont_8g002940	yellow	0.137	0.548	0	0.274	0.411	-0.137	-0.548	-0.411	-0.274
Cs_ont_8g003070	yellow	0.411	0.548	0.274	0.137	-0.137	0	-0.274	-0.548	-0.411
Cs_ont_8g003380	yellow	0.411	0.274	0.137	0.548	-0.137	0	-0.548	-0.274	-0.411
Cs_ont_8g003650	yellow	0	-0.137	0.137	0.274	0.548	0.411	-0.548	-0.274	-0.411
Cs_ont_8g003840	yellow	0.274	0.548	0	0.137	0.411	-0.137	-0.548	-0.411	-0.274
Cs_ont_8g004710	yellow	0.548	0.411	0.274	0.137	0	-0.137	-0.548	-0.411	-0.274
Cs_ont_8g006560	yellow	0.411	0.137	0.274	0	-0.137	0.548	-0.411	-0.274	-0.548
Cs_ont_8g006580	yellow	0	0.411	-0.137	0.274	0.548	0.137	-0.548	-0.411	-0.274
Cs_ont_8g006980	yellow	0.411	0.274	0.548	0.137	0	-0.137	-0.548	-0.274	-0.411
Cs_ont_8g006990	yellow	0.411	0.274	0.548	0.137	0	-0.137	-0.548	-0.411	-0.274
Cs_ont_8g007000	yellow	0.411	0.274	0.548	0	0.137	-0.137	-0.548	-0.411	-0.274
Cs_ont_8g007110	yellow	0.274	-0.137	0.548	0	0.411	0.137	-0.548	-0.411	-0.274
Cs_ont_8g007560	yellow	0.548	0.274	0.411	0.137	0	-0.137	-0.548	-0.411	-0.274
Cs_ont_8g007690	yellow	0	0.274	0.411	0.137	-0.274	0.548	-0.411	-0.137	-0.548
Cs_ont_8g007730	yellow	0	-0.137	0.137	0.548	0.274	0.411	-0.411	-0.274	-0.548
Cs_ont_8g007740	yellow	-0.137	0	0.137	0.548	0.411	0.274	-0.548	-0.411	-0.274
Cs_ont_8g007820	yellow	-0.137	0	0.274	0.548	0.411	0.137	-0.548	-0.411	-0.274
Cs_ont_8g008740	yellow	0.274	0.548	0.137	0.411	-0.137	0	-0.548	-0.411	-0.274
Cs_ont_8g008780	yellow	0.411	0.274	0.548	0.137	-0.137	0	-0.548	-0.411	-0.274
Cs_ont_8g009970	yellow	-0.137	0.137	0.274	0.411	0.548	0	-0.548	-0.411	-0.274
Cs_ont_8g010200	yellow	0.274	0.548	0	0.411	0.137	-0.137	-0.548	-0.274	-0.411
Cs_ont_8g011010	yellow	0.548	0.274	0.411	0.137	0	-0.137	-0.548	-0.411	-0.274
Cs_ont_8g011060	yellow	0.137	0.274	0.411	0	0.548	-0.137	-0.548	-0.411	-0.274
Cs_ont_8g011410	yellow	0.411	0.274	0.137	0.548	-0.137	0	-0.274	-0.548	-0.411
Cs_ont_8g013220	yellow	0.274	0.411	0.548	-0.137	0.137	0	-0.548	-0.274	-0.411
Cs_ont_8g013300	yellow	-0.137	0.137	0	0.548	0.411	0.274	-0.274	-0.548	-0.411
Cs_ont_8g014040	yellow	0.411	0.274	0.548	0.137	0	-0.137	-0.548	-0.411	-0.274
Cs_ont_8g014080	yellow	0.548	0.411	0.274	0.137	0	-0.137	-0.548	-0.411	-0.274
Cs_ont_8g014310	yellow	0	0.137	-0.137	0.411	0.548	0.274	-0.274	-0.548	-0.411
Cs_ont_8g014690	yellow	0.274	0.548	0.137	0.411	0	-0.137	-0.274	-0.411	-0.548
Cs_ont_8g016080	yellow	0.548	0.137	0	-0.274	0.274	0.411	-0.548	-0.411	-0.137
Cs_ont_8g016970	yellow	0.137	0.274	0	0.411	0.548	-0.274	-0.548	-0.411	-0.137
Cs_ont_8g017160	yellow	0.548	0.274	0.411	0.137	0	-0.137	-0.548	-0.274	-0.411
Cs_ont_8g017770	yellow	-0.274	-0.137	0.274	0.411	0.548	0	-0.548	-0.411	0.137
Cs_ont_8g018350	yellow	-0.137	0	0.137	0.411	0.548	0.274	-0.274	-0.411	-0.548
Cs_ont_8g018720	yellow	0.411	0.548	0.274	0.137	0	-0.137	-0.548	-0.411	-0.274
Cs_ont_8g018730	yellow	0.137	0.274	0.548	-0.137	0.411	0	-0.548	-0.274	-0.411
Cs_ont_8g019270	yellow	0	-0.137	0.137	0.411	0.274	0.548	-0.548	-0.274	-0.411
Cs_ont_8g020010	yellow	0.411	0.274	-0.137	0.548	0.137	0	-0.548	-0.411	-0.274
Cs_ont_8g020530	yellow	0.411	0.274	0.548	0	0.137	-0.137	-0.548	-0.274	-0.411
Cs_ont_8g020590	yellow	0.411	0.137	0.548	-0.137	0.274	0	-0.548	-0.274	-0.411
Cs_ont_8g020600	yellow	0.411	0.274	0.548	-0.274	0.137	0	-0.548	-0.137	-0.411
Cs_ont_8g020690	yellow	0.137	0.548	0.411	0	0.274	-0.137	-0.548	-0.411	-0.274
Cs_ont_8g020700	yellow	0	0.411	0.274	0.137	0.548	-0.137	-0.548	-0.411	-0.274
Cs_ont_8g020750	yellow	0.274	0.137	0	0.548	0.411	-0.137	-0.548	-0.411	-0.274
Cs_ont_8g021090	yellow	0	-0.137	0.274	0.548	0.411	0.137	-0.548	-0.411	-0.274
Cs_ont_8g021370	yellow	0.411	0.274	0.548	0.137	0	-0.137	-0.548	-0.411	-0.274
Cs_ont_8g021410	yellow	0.274	0.137	0.411	0.548	0	-0.137	-0.548	-0.411	-0.274
Cs_ont_8g021440	yellow	0.137	0.274	0.548	0	0.411	-0.137	-0.274	-0.411	-0.548
Cs_ont_8g021460	yellow	0	0.274	0.548	0.137	0.411	-0.137	-0.548	-0.411	-0.274
Cs_ont_8g021790	yellow	0.411	0.137	0.274	0.548	-0.137	0	-0.411	-0.548	-0.274
Cs_ont_8g021880	yellow	0.411	0.548	0.274	0	-0.137	0.137	-0.411	-0.274	-0.548
Cs_ont_8g022000	yellow	0.548	0.411	0.137	0	0.274	-0.137	-0.548	-0.411	-0.274
Cs_ont_8g022060	yellow	0.411	0.548	0	0.274	0.137	-0.137	-0.548	-0.411	-0.274
Cs_ont_8g022260	yellow	-0.274	-0.137	0.137	0.548	0.411	0.274	-0.548	0	-0.411
Cs_ont_8g022340	yellow	-0.137	0	0.274	0.411	0.548	0.137	-0.548	-0.411	-0.274
Cs_ont_8g022520	yellow	0.411	0.548	0.274	0.137	-0.137	0	-0.274	-0.411	-0.548
Cs_ont_8g022530	yellow	0	-0.274	0.137	0.548	0.411	0.274	-0.548	-0.411	-0.137
Cs_ont_8g022740	yellow	0.411	0.274	0.548	0	0.137	-0.137	-0.548	-0.411	-0.274
Cs_ont_8g023030	yellow	-0.137	-0.274	0.137	0.548	0.274	0.411	-0.548	0	-0.411
Cs_ont_8g023130	yellow	0.411	0.548	0.137	0.274	-0.137	-0.274	-0.548	-0.411	0
Cs_ont_8g023250	yellow	0.548	0.411	0.137	0.274	-0.137	0	-0.548	-0.411	-0.274
Cs_ont_8g023550	yellow	0.137	0.274	-0.137	0.411	0.548	0	-0.548	-0.411	-0.274
Cs_ont_8g023580	yellow	0.137	0.274	-0.137	0.411	0.548	0	-0.411	-0.548	-0.274
Cs_ont_8g024450	yellow	0.411	-0.137	0.137	0	0.274	0.548	-0.411	-0.274	-0.548
Cs_ont_8g024460	yellow	0	-0.137	0.137	0.411	0.274	0.548	-0.548	-0.274	-0.411
Cs_ont_8g024830	yellow	0.274	0.411	0.548	-0.137	0.137	0	-0.411	-0.548	-0.274
Cs_ont_8g024920	yellow	0.411	0.274	0.548	0	0.137	-0.137	-0.548	-0.274	-0.411
Cs_ont_8g025080	yellow	0.137	0	0.411	0.548	0.274	-0.137	-0.548	-0.274	-0.411
Cs_ont_8g025200	yellow	0.137	0.274	0.548	0	-0.137	0.411	-0.411	-0.274	-0.548
Cs_ont_8g025230	yellow	0.411	0.548	0.274	0.137	0	-0.137	-0.548	-0.411	-0.274
Cs_ont_8g025620	yellow	0.411	0.548	0	0.274	-0.137	0.137	-0.411	-0.274	-0.548
Cs_ont_8g026010	yellow	0.411	0	0.274	0.137	-0.137	0.548	-0.548	-0.274	-0.411
Cs_ont_8g026080	yellow	0.411	0.137	0	0.274	0.548	-0.274	-0.548	-0.137	-0.411
Cs_ont_8g026840	yellow	0.411	0.274	0.548	0.137	-0.137	0	-0.548	-0.274	-0.411
Cs_ont_8g026860	yellow	0.274	0.137	0.548	0.411	-0.137	0	-0.274	-0.411	-0.548
Cs_ont_8g027180	yellow	0.548	0.411	0.274	0.137	0	-0.137	-0.548	-0.411	-0.274
Cs_ont_8g027240	yellow	0.548	0.411	0.274	0.137	0	-0.274	-0.548	-0.411	-0.137
Cs_ont_8g027380	yellow	0.274	0	0.548	0.137	0.411	-0.137	-0.548	-0.411	-0.274
Cs_ont_8g027430	yellow	0.411	0.548	0.274	0.137	0	-0.411	-0.548	-0.274	-0.137
Cs_ont_8g027530	yellow	0.411	0.548	0.137	0	0.274	-0.137	-0.548	-0.274	-0.411
Cs_ont_8g027550	yellow	0.411	0.274	0.548	0	0.137	-0.137	-0.548	-0.274	-0.411
Cs_ont_8g028560	yellow	0.411	0.137	0.548	0.274	0	-0.137	-0.274	-0.548	-0.411
Cs_ont_8g028700	yellow	-0.137	0.137	0	0.411	0.548	0.274	-0.548	-0.411	-0.274
Cs_ont_8g028960	yellow	0.137	0	0.274	-0.137	0.411	0.548	-0.274	-0.411	-0.548
Cs_ont_8g029340	yellow	0.137	0.411	-0.137	0	0.548	0.274	-0.548	-0.411	-0.274
Cs_ont_9g000160	yellow	0.411	0.548	0.274	0	0.137	-0.137	-0.548	-0.274	-0.411
Cs_ont_9g000410	yellow	0.274	0	0.548	-0.137	0.411	0.137	-0.548	-0.411	-0.274
Cs_ont_9g000480	yellow	-0.274	0.411	-0.137	0.137	0.274	0.548	-0.548	0	-0.411
Cs_ont_9g001050	yellow	0.411	0.274	0.548	0.137	0	-0.137	-0.548	-0.411	-0.274
Cs_ont_9g001220	yellow	-0.411	-0.137	0.137	0	0.548	0.411	-0.548	-0.274	0.274
Cs_ont_9g001300	yellow	0.137	0	0.274	-0.137	0.548	0.411	-0.274	-0.411	-0.548
Cs_ont_9g002060	yellow	0.274	0.137	0.411	0	0.548	-0.274	-0.411	-0.548	-0.137
Cs_ont_9g002700	yellow	-0.137	0	0.548	0.274	0.411	0.137	-0.548	-0.274	-0.411
Cs_ont_9g003650	yellow	0.137	0	0.411	-0.137	0.274	0.548	-0.548	-0.411	-0.274
Cs_ont_9g003790	yellow	0.274	0.548	0.411	0.137	0	-0.137	-0.411	-0.274	-0.548
Cs_ont_9g003840	yellow	-0.137	-0.274	0.274	0.411	0.548	0	-0.548	-0.411	0.137
Cs_ont_9g004020	yellow	0.137	0.274	0.548	0	0.411	-0.274	-0.411	-0.548	-0.137
Cs_ont_9g004060	yellow	0.274	0.137	0	0.548	-0.137	0.411	-0.411	-0.548	-0.274
Cs_ont_9g004440	yellow	0.138	-0.138	0.275	0.413	0.55	0	-0.481	-0.481	-0.275
Cs_ont_9g004710	yellow	0.274	0.548	-0.274	0.137	0.411	0	-0.137	-0.411	-0.548
Cs_ont_9g005290	yellow	0.411	0.548	0.274	0	0.137	-0.137	-0.274	-0.411	-0.548
Cs_ont_9g005330	yellow	0.411	0.274	0.548	0.137	-0.137	0	-0.274	-0.411	-0.548
Cs_ont_9g005640	yellow	0.548	0.274	0.411	-0.137	0.137	0	-0.548	-0.411	-0.274
Cs_ont_9g006300	yellow	0.548	-0.274	-0.137	0.137	0.274	0.411	-0.411	0	-0.548
Cs_ont_9g006410	yellow	0.274	0.548	0.411	0	0.137	-0.137	-0.548	-0.274	-0.411
Cs_ont_9g006840	yellow	0.548	0.411	0.274	0.137	0	-0.137	-0.548	-0.411	-0.274
Cs_ont_9g006880	yellow	0.411	0.274	0.548	0	0.137	-0.137	-0.548	-0.411	-0.274
Cs_ont_9g007430	yellow	0.274	0	0.137	0.548	0.411	-0.137	-0.411	-0.548	-0.274
Cs_ont_9g007450	yellow	0	0.137	0.274	0.411	0.548	-0.137	-0.548	-0.411	-0.274
Cs_ont_9g008140	yellow	0	0.274	-0.274	0.411	-0.137	0.548	-0.548	0.137	-0.411
Cs_ont_9g008200	yellow	0.411	0.548	0.274	0.137	0	-0.274	-0.548	-0.411	-0.137
Cs_ont_9g008300	yellow	0.137	0.274	0	0.411	0.548	-0.137	-0.411	-0.548	-0.274
Cs_ont_9g009110	yellow	0	0.137	0.274	0.411	0.548	-0.137	-0.548	-0.411	-0.274
Cs_ont_9g009140	yellow	0	-0.137	0.411	0.274	0.548	0.137	-0.548	-0.411	-0.274
Cs_ont_9g009280	yellow	0.548	0.274	0.411	0	0.137	-0.137	-0.411	-0.548	-0.274
Cs_ont_9g009330	yellow	0.548	0.411	0.274	0.137	0	-0.274	-0.548	-0.411	-0.137
Cs_ont_9g010190	yellow	0.411	0.274	0.548	0.137	-0.137	0	-0.548	-0.411	-0.274
Cs_ont_9g010420	yellow	0.548	0.274	0.411	0.137	-0.137	0	-0.548	-0.274	-0.411
Cs_ont_9g010560	yellow	0.137	0.411	0.274	0.548	0	-0.137	-0.548	-0.411	-0.274
Cs_ont_9g010670	yellow	0.274	0.137	-0.137	0.411	0.548	0	-0.548	-0.411	-0.274
Cs_ont_9g010700	yellow	0.411	0.548	0.274	0.137	-0.137	-0.411	-0.548	-0.274	0
Cs_ont_9g010800	yellow	-0.137	0	0.411	0.274	0.548	0.137	-0.274	-0.548	-0.411
Cs_ont_9g012210	yellow	0.274	0.137	0.411	0.548	0	-0.137	-0.548	-0.411	-0.274
Cs_ont_9g012450	yellow	0.548	0.274	0.137	0.411	0	-0.411	-0.548	-0.274	-0.137
Cs_ont_9g012470	yellow	0.411	0.274	0	0.548	0.137	-0.274	-0.548	-0.137	-0.411
Cs_ont_9g012500	yellow	0.411	0.137	0.274	0.548	-0.137	0	-0.548	-0.411	-0.274
Cs_ont_9g012630	yellow	0	-0.274	0.274	0.548	0.137	0.411	-0.411	-0.137	-0.548
Cs_ont_9g013500	yellow	0.411	0.274	0.548	0.137	0	-0.137	-0.548	-0.411	-0.274
Cs_ont_9g013540	yellow	0.411	0.274	0.548	0.137	0	-0.137	-0.411	-0.548	-0.274
Cs_ont_9g013640	yellow	0.411	0.548	0.137	0.274	-0.411	-0.137	-0.548	0	-0.274
Cs_ont_9g013760	yellow	0.137	0.411	0.548	0.274	0	-0.274	-0.548	-0.411	-0.137
Cs_ont_9g013880	yellow	0	0.274	0.137	0.411	0.548	-0.137	-0.548	-0.411	-0.274
Cs_ont_9g014910	yellow	0.548	0.137	0.411	0.274	0	-0.137	-0.548	-0.274	-0.411
Cs_ont_9g015040	yellow	0.274	0	0.548	0.137	-0.137	0.411	-0.548	-0.274	-0.411
Cs_ont_9g015160	yellow	0.274	0.411	0.548	0.137	-0.137	0	-0.548	-0.411	-0.274
Cs_ont_9g017330	yellow	0.411	0.548	0.274	0.137	0	-0.137	-0.548	-0.411	-0.274
Cs_ont_9g017560	yellow	0.137	0	0.548	0.274	0.411	-0.137	-0.548	-0.411	-0.274
Cs_ont_9g018960	yellow	0.137	0.411	0.548	0.274	-0.137	0	-0.274	-0.411	-0.548
Cs_ont_9g019350	yellow	0.548	0.411	0.274	0.137	0	-0.137	-0.548	-0.411	-0.274
Cs_ont_9g020000	yellow	0	-0.274	0.411	0.548	0.137	0.274	-0.548	-0.137	-0.411
Cs_ont_9g020980	yellow	0.137	0.411	0.274	-0.137	0.548	0	-0.548	-0.274	-0.411
Cs_ont_9g021460	yellow	0.137	0.411	0.548	0	0.274	-0.137	-0.548	-0.274	-0.411
Cs_ont_9g021770	yellow	0	-0.137	0.137	0.411	0.548	0.274	-0.548	-0.411	-0.274
Cs_ont_9g022270	yellow	0	0.137	-0.137	0.548	0.274	0.411	-0.548	-0.274	-0.411
Cs_ont_9g022670	yellow	0.274	0	-0.137	0.548	0.411	0.137	-0.548	-0.411	-0.274
Cs_ont_9g023650	yellow	0.274	0.548	0.137	-0.137	0.411	0	-0.274	-0.548	-0.411
Cs_ont_9g023740	yellow	0.137	-0.137	0	0.274	0.548	0.411	-0.274	-0.548	-0.411
Cs_ont_9g023920	yellow	0.411	0.274	0.137	0.548	0	-0.137	-0.274	-0.548	-0.411
Cs_ont_9g024080	yellow	0.411	0.548	0.274	0.137	0	-0.411	-0.548	-0.274	-0.137
Cs_ont_9g024240	yellow	0.274	0.411	0.548	-0.137	0.137	0	-0.548	-0.411	-0.274
Cs_ont_9g024450	yellow	0.411	0.548	0.274	0	0.137	-0.137	-0.548	-0.411	-0.274
Cs_ont_9g024660	yellow	0.274	0.137	0.548	0.411	-0.137	0	-0.548	-0.411	-0.274
Cs_ont_9g024690	yellow	0.137	0	0.411	0.274	-0.137	0.548	-0.411	-0.548	-0.274
Cs_ont_9g024740	yellow	0.548	0.274	0.411	0.137	-0.137	0	-0.274	-0.411	-0.548
Cs_ont_9g024770	yellow	0.548	0.411	0.274	0.137	-0.137	0	-0.274	-0.548	-0.411
Cs_ont_9g025150	yellow	0.411	0.548	0.274	0	0.137	-0.137	-0.548	-0.411	-0.274
Cs_ont_9g025290	yellow	0.137	0	0.274	-0.137	0.548	0.411	-0.548	-0.411	-0.274
Cs_ont_9g025310	yellow	0.411	0.274	0.548	0	0.137	-0.137	-0.274	-0.411	-0.548
Cs_ont_9g025610	yellow	0.274	0.548	0.411	0.137	0	-0.411	-0.548	-0.274	-0.137
Cs_ont_9g026010	yellow	0.548	0.411	0	0.274	0.137	-0.137	-0.548	-0.411	-0.274
Cs_ont_9g026190	yellow	0.413	0.275	0.138	0	0.55	-0.275	-0.481	-0.481	-0.138
Cs_ont_9g026480	yellow	0.137	0	0.411	-0.137	0.548	0.274	-0.411	-0.274	-0.548
Cs_ont_9g026540	yellow	0	0.411	-0.137	0.137	0.548	0.274	-0.548	-0.411	-0.274
Cs_ont_9g026600	yellow	0.548	0.274	0.411	0.137	0	-0.137	-0.548	-0.411	-0.274
Cs_ont_9g026720	yellow	0.137	-0.137	0	0.548	0.274	0.411	-0.411	-0.274	-0.548
Cs_ont_9g027380	yellow	0.137	0.411	0.274	-0.274	0.548	0	-0.411	-0.548	-0.137
Cs_ont_9g027480	yellow	0.137	0.274	0.548	0.411	-0.137	0	-0.548	-0.411	-0.274
Cs_ont_9g027530	yellow	-0.274	0.137	0	0.548	0.411	0.274	-0.548	-0.411	-0.137
Cs_ont_9g027550	yellow	0.137	-0.274	-0.137	0.548	0.411	0.274	-0.548	-0.411	0
Cs_ont_9g027570	yellow	0.411	0.137	0.274	-0.137	0.548	0	-0.548	-0.411	-0.274
Cs_ont_9g027640	yellow	-0.137	0	0.137	0.274	0.548	0.411	-0.548	-0.411	-0.274
Cs_ont_9g028240	yellow	0.137	0.411	0.548	-0.137	0.274	0	-0.548	-0.411	-0.274
Cs_ont_Un002150	yellow	0.138	0.55	0.275	0.413	-0.138	0	-0.275	-0.481	-0.481
Cs_ont_Un003550	yellow	0.548	0.137	0.411	0.274	-0.137	0	-0.274	-0.411	-0.548
Cs_ont_Un004580	yellow	0.137	0.411	0.548	0	0.274	-0.137	-0.548	-0.274	-0.411
Cs_ont_Un006090	yellow	0.411	0.137	0.274	-0.137	0.548	-0.411	-0.548	-0.274	0
Cs_ont_1g000160	turquoise	0.414	0.276	0.552	-0.207	0.138	0	-0.483	-0.483	-0.207
Cs_ont_1g000260	turquoise	0.411	0.274	0.548	-0.137	0	-0.274	0.137	-0.548	-0.411
Cs_ont_1g000300	turquoise	0.274	0.548	0.411	0	0.137	-0.274	-0.548	-0.137	-0.411
Cs_ont_1g000590	turquoise	0.548	0.411	0.274	-0.274	-0.137	0	0.137	-0.548	-0.411
Cs_ont_1g000610	turquoise	0.274	0.411	0.548	-0.548	0	-0.274	0.137	-0.411	-0.137
Cs_ont_1g000650	turquoise	0.274	0.548	0.411	-0.548	-0.274	-0.137	0	0.137	-0.411
Cs_ont_1g000940	turquoise	0.411	0.548	0.274	0	-0.274	-0.137	-0.548	0.137	-0.411
Cs_ont_1g001030	turquoise	0.548	0.274	0.411	-0.274	0.137	-0.411	-0.548	-0.137	0
Cs_ont_1g001120	turquoise	0.411	0.548	0.274	-0.137	-0.274	0	0.137	-0.411	-0.548
Cs_ont_1g001180	turquoise	0.137	0.548	0.411	0.274	0	-0.137	-0.548	-0.411	-0.274
Cs_ont_1g001310	turquoise	0.548	0.274	0.411	0.137	-0.137	0	-0.548	-0.411	-0.274
Cs_ont_1g001580	turquoise	0.548	0.411	0.137	-0.137	0.274	-0.274	0	-0.411	-0.548
Cs_ont_1g001750	turquoise	0.548	0.274	0.411	-0.548	0	-0.274	0.137	-0.137	-0.411
Cs_ont_1g002150	turquoise	0.413	0.55	0.275	0.138	-0.0688	-0.0688	-0.55	-0.275	-0.413
Cs_ont_1g002190	turquoise	0.411	0.274	0.548	0	0.137	-0.137	-0.548	-0.411	-0.274
Cs_ont_1g002390	turquoise	0.274	0.411	0.548	0.137	-0.274	0	-0.411	-0.548	-0.137
Cs_ont_1g002400	turquoise	0.411	0.274	0.548	0	-0.411	0.137	-0.274	-0.137	-0.548
Cs_ont_1g002420	turquoise	0.548	0.274	0.411	0.137	-0.274	0	-0.548	-0.137	-0.411
Cs_ont_1g002880	turquoise	0.274	0.548	0.411	-0.548	-0.411	0.137	0	-0.137	-0.274
Cs_ont_1g003080	turquoise	0.413	0.55	0.275	-0.138	-0.481	0.138	-0.275	-0.481	0
Cs_ont_1g003160	turquoise	0.411	0.274	0.548	-0.274	-0.548	-0.137	0	0.137	-0.411
Cs_ont_1g003210	turquoise	0.548	0.411	0.274	-0.548	0	-0.137	0.137	-0.411	-0.274
Cs_ont_1g003240	turquoise	0.548	0.411	0.274	-0.137	0.137	-0.274	0	-0.548	-0.411
Cs_ont_1g003350	turquoise	0.557	0.279	0.418	0	0.139	-0.418	-0.418	-0.418	-0.139
Cs_ont_1g003730	turquoise	0.548	0.274	0.411	-0.411	0	-0.137	0.137	-0.274	-0.548
Cs_ont_1g003880	turquoise	0.274	0.411	0.548	0	0.137	-0.411	-0.548	-0.137	-0.274
Cs_ont_1g003910	turquoise	0.274	0.548	0.411	-0.411	-0.548	-0.137	0.137	0	-0.274
Cs_ont_1g004530	turquoise	0.548	0.274	0.411	-0.548	0	-0.137	0.137	-0.411	-0.274
Cs_ont_1g004570	turquoise	0.548	0.274	0.411	-0.548	0.137	0	-0.137	-0.274	-0.411
Cs_ont_1g004580	turquoise	0.411	0.548	0.274	0.137	-0.137	0	-0.411	-0.274	-0.548
Cs_ont_1g004620	turquoise	0.411	0.548	0.274	0	-0.137	0.137	-0.411	-0.274	-0.548
Cs_ont_1g004700	turquoise	0.274	0.137	0.548	-0.411	-0.137	0	0.411	-0.274	-0.548
Cs_ont_1g004750	turquoise	0.274	0.411	0.548	-0.548	-0.137	-0.411	-0.274	0	0.137
Cs_ont_1g004790	turquoise	0.411	0.274	0.548	-0.274	0.137	0	-0.137	-0.548	-0.411
Cs_ont_1g005060	turquoise	0.411	0.548	0.274	0.137	-0.137	0	-0.548	-0.411	-0.274
Cs_ont_1g005130	turquoise	0.411	0.548	0.137	0.274	0	-0.137	-0.548	-0.274	-0.411
Cs_ont_1g005240	turquoise	0.55	0.275	0.413	0.0688	0.0688	-0.138	-0.55	-0.413	-0.275
Cs_ont_1g005320	turquoise	0.413	0.275	0.55	-0.138	-0.55	0.138	0	-0.344	-0.344
Cs_ont_1g005350	turquoise	0.548	0.411	0.274	0	-0.137	-0.548	-0.411	-0.274	0.137
Cs_ont_1g005380	turquoise	0.411	0.548	0.274	0.137	0	-0.274	-0.137	-0.548	-0.411
Cs_ont_1g005420	turquoise	0.548	0.411	0.274	-0.274	0	0.137	-0.548	-0.137	-0.411
Cs_ont_1g005440	turquoise	0.429	0.572	0.286	-0.358	0.143	-0.358	-0.358	0	-0.358
Cs_ont_1g005620	turquoise	0.411	0.548	0.274	0.137	0	-0.137	-0.274	-0.548	-0.411
Cs_ont_1g005810	turquoise	0.411	0.548	0.274	0	-0.274	-0.137	-0.548	0.137	-0.411
Cs_ont_1g005830	turquoise	0.548	0.274	0.411	-0.274	-0.548	0.137	-0.137	0	-0.411
Cs_ont_1g005980	turquoise	0.411	0.274	0.548	-0.548	-0.411	-0.274	-0.137	0	0.137
Cs_ont_1g006070	turquoise	0.548	0.411	0.274	0.137	0	-0.274	-0.548	-0.411	-0.137
Cs_ont_1g006260	turquoise	0.411	0.548	0.274	-0.548	-0.411	-0.137	0	0.137	-0.274
Cs_ont_1g006390	turquoise	0.279	0.557	0.418	0.139	-0.418	-0.418	0	-0.139	-0.418
Cs_ont_1g006490	turquoise	0.411	0.137	0.548	0	0.274	-0.274	-0.548	-0.137	-0.411
Cs_ont_1g006560	turquoise	0.137	0.411	0.274	-0.274	-0.411	-0.548	0.548	-0.137	0
Cs_ont_1g006580	turquoise	0.411	0	0.137	-0.548	-0.411	-0.274	0.548	-0.137	0.274
Cs_ont_1g006760	turquoise	0.411	0.274	0.548	-0.137	0.137	0	-0.411	-0.274	-0.548
Cs_ont_1g006990	turquoise	0.411	0.548	0.274	-0.137	0	-0.274	0.137	-0.411	-0.548
Cs_ont_1g007050	turquoise	0.548	0.274	0.411	-0.411	-0.548	0	0.137	-0.274	-0.137
Cs_ont_1g007080	turquoise	0.411	0.548	0.137	0.274	-0.411	-0.274	-0.548	0	-0.137
Cs_ont_1g007200	turquoise	0.411	0.548	0.274	0.137	-0.274	-0.137	-0.548	-0.411	0
Cs_ont_1g007420	turquoise	0.411	0.548	0.274	0.137	-0.137	0	-0.548	-0.411	-0.274
Cs_ont_1g007430	turquoise	0.548	0.411	0.274	-0.548	-0.411	-0.274	0.137	-0.137	0
Cs_ont_1g007620	turquoise	0.548	0.274	0.411	-0.274	-0.548	-0.411	0.137	-0.137	0
Cs_ont_1g007630	turquoise	0.411	0.548	0.274	0	-0.274	-0.137	0.137	-0.548	-0.411
Cs_ont_1g007840	turquoise	0.274	0.548	0.411	-0.274	0	-0.548	-0.411	-0.137	0.137
Cs_ont_1g007860	turquoise	0.411	0.548	0.274	0	0.137	-0.137	-0.548	-0.274	-0.411
Cs_ont_1g007890	turquoise	0.274	0.411	0.548	-0.137	0.137	0	-0.274	-0.548	-0.411
Cs_ont_1g008120	turquoise	0.411	0.548	0.274	-0.411	-0.548	-0.137	0.137	-0.274	0
Cs_ont_1g008190	turquoise	0.274	0.411	0.548	-0.411	-0.274	-0.137	0.137	0	-0.548
Cs_ont_1g008400	turquoise	0.548	0.411	0.274	0	-0.411	-0.274	-0.548	-0.137	0.137
Cs_ont_1g008570	turquoise	0.411	0.274	0.548	-0.411	0	-0.137	0.137	-0.548	-0.274
Cs_ont_1g008600	turquoise	0.411	0.548	0.274	0.137	-0.274	-0.137	0	-0.548	-0.411
Cs_ont_1g008900	turquoise	0.548	0.274	0.411	-0.274	0.137	-0.137	-0.411	0	-0.548
Cs_ont_1g009320	turquoise	0.548	0.274	0.411	-0.137	0.137	-0.411	-0.548	-0.274	0
Cs_ont_1g009480	turquoise	0.548	0.411	0.274	0.137	-0.137	0	-0.548	-0.274	-0.411
Cs_ont_1g009590	turquoise	0.411	0.274	0.548	0.137	-0.274	0	-0.137	-0.411	-0.548
Cs_ont_1g009730	turquoise	0.411	0.137	0.548	0	0.274	-0.137	-0.274	-0.548	-0.411
Cs_ont_1g009760	turquoise	0.274	0.411	0.548	-0.411	-0.548	0.137	0	-0.137	-0.274
Cs_ont_1g009790	turquoise	0.274	0.548	0.411	0	-0.274	-0.137	-0.548	-0.411	0.137
Cs_ont_1g009820	turquoise	0.411	0.274	0.548	-0.137	0.137	0	-0.411	-0.274	-0.548
Cs_ont_1g009830	turquoise	0.548	0.411	0.274	0.137	-0.274	0	-0.548	-0.411	-0.137
Cs_ont_1g010030	turquoise	0.411	0.548	0.274	-0.548	-0.411	0	-0.274	-0.137	0.137
Cs_ont_1g010120	turquoise	0.411	0.548	0.274	-0.274	-0.137	0	0.137	-0.548	-0.411
Cs_ont_1g010150	turquoise	0.411	0.274	0.548	0.137	0	-0.137	-0.548	-0.411	-0.274
Cs_ont_1g010990	turquoise	0.411	0.274	0.548	-0.274	-0.548	-0.137	0.137	0	-0.411
Cs_ont_1g011080	turquoise	0.45	0.6	0.3	-0.3	0.15	-0.3	-0.3	-0.3	-0.3
Cs_ont_1g011110	turquoise	0.411	0.548	0.274	0.137	-0.137	-0.411	-0.548	0	-0.274
Cs_ont_1g011560	turquoise	0.548	0.411	0.274	-0.548	-0.274	-0.411	0.137	-0.137	0
Cs_ont_1g011650	turquoise	0.274	0.137	0.548	0	-0.137	0.411	-0.411	-0.274	-0.548
Cs_ont_1g012660	turquoise	0.548	0.274	0.411	-0.137	-0.548	-0.274	-0.411	0.137	0
Cs_ont_1g012730	turquoise	0.411	0.274	0.548	0.137	0	-0.137	-0.274	-0.548	-0.411
Cs_ont_1g012810	turquoise	0.411	0.548	0.274	0.137	0	-0.274	-0.411	-0.548	-0.137
Cs_ont_1g012950	turquoise	0.411	0.548	0.274	0.137	-0.548	-0.411	-0.137	-0.274	0
Cs_ont_1g012970	turquoise	0.548	0.411	0.274	-0.137	-0.548	0.137	0	-0.411	-0.274
Cs_ont_1g013080	turquoise	0.548	0.274	0.411	-0.137	-0.274	0.137	-0.548	0	-0.411
Cs_ont_1g013110	turquoise	0.411	0.548	-0.411	-0.548	-0.274	0.137	0.274	-0.137	0
Cs_ont_1g013290	turquoise	0.548	0.274	0.411	0.137	0	-0.137	-0.548	-0.411	-0.274
Cs_ont_1g013300	turquoise	0.411	0.274	0.548	0	0.137	-0.137	-0.274	-0.411	-0.548
Cs_ont_1g013340	turquoise	0.411	0.274	0.548	0	0.137	-0.137	-0.411	-0.548	-0.274
Cs_ont_1g013810	turquoise	0.274	0.548	0.411	-0.411	0.137	0	-0.137	-0.548	-0.274
Cs_ont_1g013840	turquoise	0.274	0.137	0.548	-0.411	-0.548	-0.137	0.411	-0.274	0
Cs_ont_1g013900	turquoise	0.548	0.274	0.411	-0.137	-0.274	0	-0.411	-0.548	0.137
Cs_ont_1g014010	turquoise	0.274	0.548	0.411	0.137	0	-0.411	-0.137	-0.548	-0.274
Cs_ont_1g014020	turquoise	0.548	0.274	0.411	-0.137	-0.411	-0.274	-0.548	0	0.137
Cs_ont_1g014040	turquoise	0.548	0.274	0.411	0.137	-0.137	0	-0.548	-0.274	-0.411
Cs_ont_1g014070	turquoise	0.411	0.548	0.274	-0.137	0	0.137	-0.548	-0.274	-0.411
Cs_ont_1g014180	turquoise	0.411	0.274	0.548	-0.411	0.137	-0.274	-0.548	0	-0.137
Cs_ont_1g014350	turquoise	0.548	0.411	0.274	0.137	-0.274	0	-0.411	-0.137	-0.548
Cs_ont_1g014380	turquoise	0.548	0.411	0.274	-0.411	-0.548	-0.137	0.137	-0.274	0
Cs_ont_1g014620	turquoise	0.548	0.274	0.411	0	-0.137	0.137	-0.274	-0.411	-0.548
Cs_ont_1g014720	turquoise	0.411	0.548	0.274	-0.274	0	-0.137	0.137	-0.548	-0.411
Cs_ont_1g014800	turquoise	0.411	0.548	0.274	0	-0.548	-0.137	0.137	-0.274	-0.411
Cs_ont_1g014920	turquoise	0.274	0.137	0	-0.548	-0.274	-0.137	0.548	-0.411	0.411
Cs_ont_1g014950	turquoise	0.411	0.548	0.274	-0.274	-0.137	0.137	0	-0.411	-0.548
Cs_ont_1g014980	turquoise	0.276	0.414	0.552	0.138	-0.483	-0.069	-0.276	-0.483	-0.069
Cs_ont_1g014990	turquoise	0.411	0.548	0.274	0	0.137	-0.137	-0.548	-0.411	-0.274
Cs_ont_1g015060	turquoise	0.548	0.411	0.274	0	0.137	-0.274	-0.548	-0.411	-0.137
Cs_ont_1g015200	turquoise	0.411	0.274	0.548	0	0.137	-0.274	-0.137	-0.411	-0.548
Cs_ont_1g015240	turquoise	0.548	0.411	0.274	-0.274	0	0.137	-0.137	-0.411	-0.548
Cs_ont_1g015270	turquoise	0.411	0.274	0.548	-0.274	0.137	0	-0.548	-0.137	-0.411
Cs_ont_1g016080	turquoise	0.411	0.548	0.274	0	-0.411	-0.137	0.137	-0.274	-0.548
Cs_ont_1g016100	turquoise	0.548	0.411	0.137	-0.137	-0.548	0	0.274	-0.411	-0.274
Cs_ont_1g016140	turquoise	0.411	0.274	0.548	-0.411	0.137	-0.137	-0.548	0	-0.274
Cs_ont_1g016670	turquoise	0.548	0.274	0.411	-0.548	0	-0.137	0.137	-0.274	-0.411
Cs_ont_1g016780	turquoise	0.137	0	0.274	-0.411	-0.274	-0.137	0.548	-0.548	0.411
Cs_ont_1g016810	turquoise	0.274	0.548	0.137	0.411	-0.137	0	-0.548	-0.274	-0.411
Cs_ont_1g016830	turquoise	0.411	0.548	0.274	-0.137	-0.548	0	0.137	-0.274	-0.411
Cs_ont_1g016850	turquoise	0.411	0.548	0.274	0.137	-0.137	-0.548	-0.274	-0.411	0
Cs_ont_1g016910	turquoise	0.274	0.548	0.411	-0.548	-0.274	-0.411	0.137	0	-0.137
Cs_ont_1g017130	turquoise	0.137	0.274	0.548	-0.274	0.411	0	-0.411	-0.137	-0.548
Cs_ont_1g017170	turquoise	0.55	0.344	0.138	-0.275	-0.138	-0.413	0	-0.55	0.344
Cs_ont_1g017210	turquoise	0.411	0.548	0.274	0.137	-0.137	0	-0.548	-0.411	-0.274
Cs_ont_1g017240	turquoise	0.413	0.55	0.275	-0.138	-0.275	0	0.138	-0.481	-0.481
Cs_ont_1g017330	turquoise	0.274	0.411	0.137	-0.274	0.548	-0.137	0	-0.411	-0.548
Cs_ont_1g017520	turquoise	0.411	0.548	0.274	-0.137	-0.548	-0.274	0.137	-0.411	0
Cs_ont_1g017560	turquoise	0.411	0.548	0.274	-0.274	-0.137	0	0.137	-0.411	-0.548
Cs_ont_1g017570	turquoise	0.274	0.548	0.411	0.137	0	-0.137	-0.274	-0.548	-0.411
Cs_ont_1g017600	turquoise	0.411	0.548	0.274	0.137	-0.137	0	-0.274	-0.548	-0.411
Cs_ont_1g017640	turquoise	0.274	0.411	0.137	-0.411	-0.137	-0.274	0.548	-0.548	0
Cs_ont_1g017650	turquoise	0.411	0.548	0.274	-0.274	0.137	-0.137	0	-0.411	-0.548
Cs_ont_1g017870	turquoise	0.274	0.411	0.548	-0.411	-0.274	-0.137	0.137	-0.548	0
Cs_ont_1g018060	turquoise	0.411	0.548	0.274	0.137	0	-0.274	-0.411	-0.548	-0.137
Cs_ont_1g018070	turquoise	0.42	0.56	0.28	-0.0699	0.14	-0.0699	-0.42	-0.42	-0.42
Cs_ont_1g018320	turquoise	0.548	0.411	0.274	-0.411	0.137	-0.137	0	-0.548	-0.274
Cs_ont_1g018630	turquoise	0.411	0.548	0.274	-0.137	-0.411	-0.274	-0.548	0	0.137
Cs_ont_1g018750	turquoise	0.411	0.548	0.274	-0.548	0.137	0	-0.274	-0.411	-0.137
Cs_ont_1g018900	turquoise	0.274	0.548	0.137	-0.411	-0.548	-0.274	0.411	0	-0.137
Cs_ont_1g018970	turquoise	0.411	0.548	0.274	0.137	0	-0.137	-0.274	-0.411	-0.548
Cs_ont_1g019320	turquoise	0.274	0.548	0.411	-0.548	-0.274	-0.411	0.137	0	-0.137
Cs_ont_1g019350	turquoise	0.411	0.548	0	0.137	-0.548	0.274	-0.411	-0.274	-0.137
Cs_ont_1g019360	turquoise	0.274	0.548	0.137	-0.274	-0.137	-0.411	0.411	-0.548	0
Cs_ont_1g019380	turquoise	0	0.137	0.411	-0.411	-0.274	-0.137	0.548	-0.548	0.274
Cs_ont_1g019390	turquoise	0.274	0.411	0.548	-0.137	0.137	0	-0.411	-0.274	-0.548
Cs_ont_1g019450	turquoise	0.274	0.548	0.411	0.137	0	-0.137	-0.411	-0.548	-0.274
Cs_ont_1g019820	turquoise	0.411	0.548	0.274	-0.274	0.137	-0.137	0	-0.411	-0.548
Cs_ont_1g019930	turquoise	0.548	0.274	0.411	-0.137	-0.548	0.137	-0.411	0	-0.274
Cs_ont_1g019970	turquoise	0.411	0.548	0.274	0.137	-0.274	0	-0.137	-0.411	-0.548
Cs_ont_1g020000	turquoise	0.548	0.411	0.274	-0.274	-0.137	-0.411	0.137	0	-0.548
Cs_ont_1g020050	turquoise	0.548	0.274	0.411	-0.137	-0.548	0.137	-0.411	0	-0.274
Cs_ont_1g020120	turquoise	0.411	0.274	0.548	0	0.137	-0.137	-0.548	-0.411	-0.274
Cs_ont_1g020180	turquoise	0.548	0.411	0.274	-0.548	-0.274	-0.137	0.137	-0.411	0
Cs_ont_1g020200	turquoise	0.548	0.411	0.274	0.137	-0.274	-0.548	-0.137	-0.411	0
Cs_ont_1g020240	turquoise	0.411	0.274	0.548	-0.548	-0.274	-0.137	-0.411	0.137	0
Cs_ont_1g020400	turquoise	0.411	0.548	0.274	0	0.137	-0.137	-0.274	-0.548	-0.411
Cs_ont_1g020890	turquoise	0.274	0.411	0.548	-0.274	0	-0.137	0.137	-0.548	-0.411
Cs_ont_1g021020	turquoise	0.274	0.411	0.137	-0.548	-0.274	-0.137	0.548	-0.411	0
Cs_ont_1g021320	turquoise	0.548	0.274	0.411	-0.548	-0.137	0	0.137	-0.274	-0.411
Cs_ont_1g021430	turquoise	0.411	0.274	0.548	-0.411	0.137	-0.137	0	-0.548	-0.274
Cs_ont_1g021750	turquoise	0.411	0.274	0.548	-0.411	0	-0.137	0.137	-0.548	-0.274
Cs_ont_1g021910	turquoise	0.411	0.548	0.274	-0.274	0	-0.411	0.137	-0.548	-0.137
Cs_ont_1g022170	turquoise	0.548	0.411	0.274	-0.274	-0.137	0.137	0	-0.411	-0.548
Cs_ont_1g022210	turquoise	0.411	0.274	0.548	-0.411	0.137	0	-0.137	-0.274	-0.548
Cs_ont_1g022280	turquoise	0.274	0.411	0	-0.411	-0.274	-0.137	0.548	-0.548	0.137
Cs_ont_1g022370	turquoise	0.411	0.548	0.274	-0.137	0	0.137	-0.274	-0.411	-0.548
Cs_ont_1g022450	turquoise	0.55	0.275	0.413	-0.138	0.138	0	-0.481	-0.481	-0.275
Cs_ont_1g022490	turquoise	0.137	0.548	0.411	-0.274	0	-0.411	0.274	-0.548	-0.137
Cs_ont_1g022620	turquoise	0.411	0.548	0.274	-0.274	-0.548	-0.411	0.137	-0.137	0
Cs_ont_1g022670	turquoise	0.274	0.137	0.548	0	0.411	-0.274	-0.137	-0.548	-0.411
Cs_ont_1g022680	turquoise	0.548	0.274	0.411	-0.548	0.137	-0.274	0	-0.137	-0.411
Cs_ont_1g023180	turquoise	0.411	0.274	0.548	-0.137	0.137	0	-0.274	-0.411	-0.548
Cs_ont_1g023190	turquoise	0.274	0.411	0.548	-0.137	0	0.137	-0.274	-0.411	-0.548
Cs_ont_1g023250	turquoise	0.137	0.411	0.274	-0.411	-0.274	-0.137	0.548	-0.548	0
Cs_ont_1g023390	turquoise	0.548	0.411	-0.274	-0.411	-0.548	-0.137	0.274	0.137	0
Cs_ont_1g023580	turquoise	0.274	0.411	0.548	-0.411	0.137	-0.137	0	-0.548	-0.274
Cs_ont_1g023700	turquoise	0.411	0.548	0.274	-0.274	-0.137	0	0.137	-0.411	-0.548
Cs_ont_1g023760	turquoise	0.548	0.411	0.274	-0.274	-0.411	0	0.137	-0.548	-0.137
Cs_ont_1g023770	turquoise	0.274	0.411	0.548	-0.137	0	0.137	-0.274	-0.548	-0.411
Cs_ont_1g023880	turquoise	0.411	0.137	0.274	-0.548	0	-0.274	0.548	-0.137	-0.411
Cs_ont_1g023920	turquoise	0.411	0.548	0.274	0.137	-0.137	0	-0.411	-0.548	-0.274
Cs_ont_1g024020	turquoise	0.274	0.548	0.411	0	-0.411	0.137	-0.274	-0.137	-0.548
Cs_ont_1g024360	turquoise	0.411	0.274	0.548	-0.274	0	0.137	-0.137	-0.411	-0.548
Cs_ont_1g024370	turquoise	0.411	0.548	0.274	-0.274	-0.137	0	0.137	-0.411	-0.548
Cs_ont_1g024450	turquoise	0.411	0.548	0.274	-0.274	-0.137	0	0.137	-0.548	-0.411
Cs_ont_1g024490	turquoise	0.411	0.274	0.548	-0.411	0	0.137	-0.274	-0.137	-0.548
Cs_ont_1g024730	turquoise	0.548	0.274	0.411	-0.137	0.137	0	-0.411	-0.548	-0.274
Cs_ont_1g024820	turquoise	0.411	0.274	0.548	-0.548	-0.137	0	0.137	-0.274	-0.411
Cs_ont_1g024940	turquoise	0.274	0.548	0.411	-0.411	-0.137	-0.274	0.137	-0.548	0
Cs_ont_1g025400	turquoise	0.548	0.411	0.274	-0.411	-0.137	-0.274	0.137	-0.548	0
Cs_ont_1g025520	turquoise	0.274	0.411	0.548	-0.137	0	0.137	-0.548	-0.274	-0.411
Cs_ont_1g025650	turquoise	0.411	0.548	0.274	0	0.137	-0.137	-0.548	-0.274	-0.411
Cs_ont_1g025680	turquoise	0.411	0.548	0.274	-0.548	0	-0.137	0.137	-0.411	-0.274
Cs_ont_1g025910	turquoise	0	0.137	0.274	-0.411	-0.137	-0.274	0.548	-0.548	0.411
Cs_ont_1g025920	turquoise	0.411	0.548	0.274	-0.137	0.137	0	-0.274	-0.548	-0.411
Cs_ont_1g026080	turquoise	0.274	0.411	0.548	-0.548	-0.274	-0.411	-0.137	0.137	0
Cs_ont_1g026100	turquoise	0.411	0.274	0.548	-0.411	-0.137	0.137	-0.274	0	-0.548
Cs_ont_1g026270	turquoise	0.411	0.548	0.274	-0.411	-0.137	-0.548	-0.274	0.137	0
Cs_ont_1g026530	turquoise	0.548	0.411	0.274	-0.548	-0.137	0	0.137	-0.274	-0.411
Cs_ont_1g026560	turquoise	0.274	0.411	0.548	0	0.137	-0.137	-0.274	-0.411	-0.548
Cs_ont_1g026740	turquoise	0.411	0.548	0.274	-0.137	0.137	-0.274	0	-0.411	-0.548
Cs_ont_1g026780	turquoise	0.274	0.548	0.411	0.137	0	-0.274	-0.137	-0.548	-0.411
Cs_ont_1g026880	turquoise	0.548	0.411	0.274	0.137	0	-0.137	-0.411	-0.548	-0.274
Cs_ont_1g026990	turquoise	0.411	0.548	0.274	0.137	0	-0.274	-0.548	-0.411	-0.137
Cs_ont_1g027470	turquoise	0.411	0.548	0.274	-0.411	0	-0.137	0.137	-0.548	-0.274
Cs_ont_1g027500	turquoise	0.274	0.137	0.548	-0.137	0.411	0	-0.274	-0.411	-0.548
Cs_ont_1g027640	turquoise	0.548	0.137	0.274	-0.411	-0.548	-0.274	0.411	0	-0.137
Cs_ont_1g027680	turquoise	0.411	0.274	0.548	0	-0.137	0.137	-0.274	-0.548	-0.411
Cs_ont_1g027700	turquoise	0.411	0.548	0.274	0	0.137	-0.411	-0.548	-0.274	-0.137
Cs_ont_1g027850	turquoise	0.3	0.6	0.45	-0.3	-0.3	-0.3	-0.3	0.15	-0.3
Cs_ont_1g027900	turquoise	0.411	0.548	0.274	-0.274	-0.137	0.137	0	-0.411	-0.548
Cs_ont_1g028230	turquoise	0.411	0.548	0.137	0.274	-0.274	0	-0.548	-0.137	-0.411
Cs_ont_1g028250	turquoise	0.274	0.411	0.137	-0.548	-0.274	-0.137	0.548	-0.411	0
Cs_ont_1g028380	turquoise	0.548	0.411	0.274	-0.137	-0.411	0.137	0	-0.274	-0.548
Cs_ont_1g028390	turquoise	0.411	0.548	0.274	0.137	-0.548	0	-0.411	-0.137	-0.274
Cs_ont_1g028470	turquoise	0.411	0.548	0.274	-0.137	0.137	0	-0.274	-0.411	-0.548
Cs_ont_1g028480	turquoise	0.274	0.411	0.548	-0.274	0.137	-0.137	0	-0.411	-0.548
Cs_ont_1g028490	turquoise	0.137	0.411	0.274	-0.411	0	-0.274	0.548	-0.548	-0.137
Cs_ont_1g028590	turquoise	0.274	0.548	0.411	-0.548	0	-0.274	0.137	-0.137	-0.411
Cs_ont_1g028740	turquoise	0.413	0.55	0.275	-0.481	-0.138	0.138	0	-0.481	-0.275
Cs_ont_1g028910	turquoise	0.411	0.548	0.274	0.137	-0.274	-0.137	-0.548	0	-0.411
Cs_ont_1g029140	turquoise	0.55	0.275	0	-0.481	-0.481	-0.275	0.413	0.138	-0.138
Cs_ont_1g029170	turquoise	0.548	0.411	0.274	0.137	-0.411	-0.274	-0.548	0	-0.137
Cs_ont_1g029240	turquoise	0.411	0.548	0.137	0	0.274	-0.274	-0.137	-0.411	-0.548
Cs_ont_1g029490	turquoise	0.274	0.411	0.548	-0.411	0.137	0	-0.137	-0.548	-0.274
Cs_ont_2g000290	turquoise	0.411	0.548	0.274	-0.137	0.137	0	-0.274	-0.411	-0.548
Cs_ont_2g000450	turquoise	0.411	0.548	0.274	-0.411	-0.548	-0.274	0.137	-0.137	0
Cs_ont_2g000590	turquoise	0.548	0.411	0.274	0.137	-0.548	-0.137	0	-0.411	-0.274
Cs_ont_2g000630	turquoise	0.411	0.274	-0.137	-0.274	0	0.137	0.548	-0.548	-0.411
Cs_ont_2g000680	turquoise	0.275	0.413	0.0688	-0.55	-0.413	-0.275	-0.138	0.55	0.0688
Cs_ont_2g000770	turquoise	0.274	0.548	0.411	-0.411	0	0.137	-0.137	-0.274	-0.548
Cs_ont_2g001060	turquoise	0.411	0.137	0.548	0	0.274	-0.274	-0.137	-0.548	-0.411
Cs_ont_2g001090	turquoise	0.411	0.548	0.274	-0.137	0	-0.548	-0.411	0.137	-0.274
Cs_ont_2g001140	turquoise	0.548	0.411	0.274	-0.274	-0.137	0.137	0	-0.411	-0.548
Cs_ont_2g001190	turquoise	0.411	0.274	0.548	-0.274	0	-0.411	-0.548	-0.137	0.137
Cs_ont_2g001350	turquoise	0.274	0.548	0.411	-0.274	-0.137	0	0.137	-0.548	-0.411
Cs_ont_2g001390	turquoise	0	0.548	0.274	0.411	-0.411	0.137	-0.274	-0.137	-0.548
Cs_ont_2g001530	turquoise	0.411	0.274	0.548	-0.137	0	0.137	-0.274	-0.548	-0.411
Cs_ont_2g001690	turquoise	0.411	0.274	0.548	-0.274	0	0.137	-0.137	-0.411	-0.548
Cs_ont_2g001720	turquoise	0.411	0.548	0.274	-0.274	-0.548	-0.137	0.137	0	-0.411
Cs_ont_2g001780	turquoise	0.275	0.481	0.138	-0.413	0.481	0	-0.138	-0.55	-0.275
Cs_ont_2g002240	turquoise	0.274	0.411	0.548	0.137	-0.137	0	-0.548	-0.274	-0.411
Cs_ont_2g002270	turquoise	0.548	0.411	0.274	-0.274	-0.137	0.137	0	-0.411	-0.548
Cs_ont_2g002360	turquoise	0.274	0.411	0.548	-0.137	0.137	-0.411	0	-0.274	-0.548
Cs_ont_2g002370	turquoise	0.548	0.274	0.411	0.137	0	-0.274	-0.548	-0.411	-0.137
Cs_ont_2g002390	turquoise	0.411	0.274	0.548	-0.411	-0.137	0	0.137	-0.548	-0.274
Cs_ont_2g002570	turquoise	0.274	0.548	0.137	-0.274	-0.137	0	0.411	-0.548	-0.411
Cs_ont_2g002930	turquoise	0.274	0.548	0.411	-0.274	-0.411	0	0.137	-0.137	-0.548
Cs_ont_2g002940	turquoise	0.411	0.548	0.274	-0.548	0.137	-0.137	0	-0.274	-0.411
Cs_ont_2g002980	turquoise	0.274	0.411	0.548	-0.411	-0.137	-0.548	0.137	-0.274	0
Cs_ont_2g002990	turquoise	0.548	0.274	0.411	-0.548	0	-0.274	0.137	-0.411	-0.137
Cs_ont_2g003130	turquoise	0.274	0.411	0.548	0	0.137	-0.137	-0.548	-0.411	-0.274
Cs_ont_2g003190	turquoise	0.411	0.548	0.274	-0.137	-0.274	0.137	0	-0.411	-0.548
Cs_ont_2g003350	turquoise	0.411	0.274	0.548	0.137	-0.137	0	-0.548	-0.274	-0.411
Cs_ont_2g003450	turquoise	0.418	0.557	0.279	-0.139	-0.418	-0.418	0.139	-0.418	0
Cs_ont_2g003470	turquoise	0.548	0.411	0.274	-0.548	0	-0.137	0.137	-0.411	-0.274
Cs_ont_2g003580	turquoise	0.411	0.548	0.274	-0.137	-0.274	0.137	0	-0.411	-0.548
Cs_ont_2g003600	turquoise	0.411	0.548	0.274	-0.137	0	-0.274	0.137	-0.548	-0.411
Cs_ont_2g003760	turquoise	0.274	0.137	0.411	-0.411	-0.548	0	-0.274	0.548	-0.137
Cs_ont_2g003890	turquoise	0.411	0.548	0.274	0.137	0	-0.137	-0.274	-0.411	-0.548
Cs_ont_2g003920	turquoise	0.411	0.274	0.548	0	0.137	-0.137	-0.274	-0.411	-0.548
Cs_ont_2g004020	turquoise	0.548	0.411	0.274	-0.274	0	-0.137	0.137	-0.411	-0.548
Cs_ont_2g004040	turquoise	0.411	0.548	0.274	0.137	0	-0.137	-0.274	-0.411	-0.548
Cs_ont_2g004190	turquoise	0.548	0.411	0.274	-0.411	-0.274	-0.548	0	-0.137	0.137
Cs_ont_2g004200	turquoise	0.548	0.274	0.411	-0.274	-0.548	-0.411	-0.137	0	0.137
Cs_ont_2g004400	turquoise	0.548	0.274	0.411	-0.274	0	-0.137	-0.548	-0.411	0.137
Cs_ont_2g004570	turquoise	0.274	0.411	0.548	-0.137	0.137	-0.274	0	-0.411	-0.548
Cs_ont_2g004740	turquoise	0.411	0.274	0.548	-0.411	-0.137	-0.274	-0.548	0.137	0
Cs_ont_2g004940	turquoise	0.411	0.548	0.274	-0.137	-0.274	0	0.137	-0.411	-0.548
Cs_ont_2g005170	turquoise	0.413	0.275	0.55	-0.275	0	-0.138	0.138	-0.481	-0.481
Cs_ont_2g005270	turquoise	0.411	0.548	0.137	0.274	-0.548	-0.274	0	-0.411	-0.137
Cs_ont_2g005680	turquoise	0.274	0.548	0.137	-0.548	0	-0.137	0.411	-0.411	-0.274
Cs_ont_2g005690	turquoise	0.274	0.548	0.411	-0.411	-0.137	0	0.137	-0.274	-0.548
Cs_ont_2g005700	turquoise	0.411	0.548	0.274	-0.548	0.137	0	-0.411	-0.137	-0.274
Cs_ont_2g006020	turquoise	0.411	0.548	0.274	-0.548	0	-0.137	0.137	-0.411	-0.274
Cs_ont_2g006080	turquoise	0.411	0.548	0.274	0.137	-0.137	-0.411	-0.548	-0.274	0
Cs_ont_2g006100	turquoise	0.274	0.548	0.411	0.137	0	-0.274	-0.548	-0.411	-0.137
Cs_ont_2g006210	turquoise	0.411	0.548	0.274	0	-0.411	-0.137	0.137	-0.548	-0.274
Cs_ont_2g006280	turquoise	0.548	0.411	0.274	-0.548	-0.411	-0.137	0.137	-0.274	0
Cs_ont_2g006530	turquoise	0.411	0.548	0.274	-0.274	-0.137	0	0.137	-0.411	-0.548
Cs_ont_2g006900	turquoise	0.411	0.548	0.137	-0.411	-0.137	-0.274	0.274	-0.548	0
Cs_ont_2g006980	turquoise	0.548	0.411	0.274	-0.137	0.137	-0.274	-0.548	-0.411	0
Cs_ont_2g007000	turquoise	0.411	0.274	0.137	-0.137	0.548	0	-0.411	-0.274	-0.548
Cs_ont_2g007120	turquoise	0.411	0.548	0.274	-0.274	-0.137	0.137	0	-0.411	-0.548
Cs_ont_2g007230	turquoise	0.411	0.548	0.274	0.137	0	-0.274	-0.548	-0.411	-0.137
Cs_ont_2g007340	turquoise	0.418	0.557	0.279	-0.418	0.139	-0.418	0	-0.418	-0.139
Cs_ont_2g007510	turquoise	0.548	0.274	0.411	-0.411	-0.137	0	0.137	-0.274	-0.548
Cs_ont_2g007680	turquoise	0.548	0.274	0.411	-0.411	0	-0.274	0.137	-0.548	-0.137
Cs_ont_2g007980	turquoise	0.411	0.274	0.548	-0.137	0	0.137	-0.548	-0.411	-0.274
Cs_ont_2g008000	turquoise	0.411	0.274	0.548	0	0.137	-0.137	-0.548	-0.411	-0.274
Cs_ont_2g008040	turquoise	0.411	0.548	0.274	0.137	0	-0.411	-0.548	-0.274	-0.137
Cs_ont_2g008050	turquoise	0.411	0.274	0.548	0.137	-0.137	0	-0.548	-0.274	-0.411
Cs_ont_2g008120	turquoise	0.548	0.274	0.411	-0.548	-0.274	0	0.137	-0.411	-0.137
Cs_ont_2g008430	turquoise	0.418	0.139	0.279	0	0.557	-0.279	-0.279	-0.557	-0.279
Cs_ont_2g008600	turquoise	0.411	0.548	0.274	-0.274	0	0.137	-0.137	-0.411	-0.548
Cs_ont_2g008720	turquoise	0.411	0.548	0.274	-0.411	-0.137	-0.274	0.137	0	-0.548
Cs_ont_2g008740	turquoise	0.548	0.411	0.274	0.137	-0.137	0	-0.548	-0.411	-0.274
Cs_ont_2g008810	turquoise	0.411	0.548	0.274	-0.274	-0.137	0	0.137	-0.411	-0.548
Cs_ont_2g008860	turquoise	0.548	0.274	0.411	-0.274	0.137	-0.411	0	-0.548	-0.137
Cs_ont_2g008870	turquoise	0.548	0.274	0.411	0	-0.274	-0.411	0.137	-0.548	-0.137
Cs_ont_2g008880	turquoise	0.411	0.548	0.137	-0.274	-0.137	0	0.274	-0.548	-0.411
Cs_ont_2g008890	turquoise	0.481	0.481	0.275	-0.138	-0.55	-0.413	0	-0.275	0.138
Cs_ont_2g008930	turquoise	0.274	0.548	0.411	-0.274	0	0.137	-0.548	-0.137	-0.411
Cs_ont_2g009020	turquoise	0.411	0.548	0.274	-0.137	-0.411	0	0.137	-0.274	-0.548
Cs_ont_2g009030	turquoise	0.274	0.548	0.411	-0.548	0	-0.137	0.137	-0.274	-0.411
Cs_ont_2g009320	turquoise	0.274	0.411	0.548	-0.274	0.137	-0.137	0	-0.548	-0.411
Cs_ont_2g009350	turquoise	0.274	0.548	0.411	0.137	0	-0.137	-0.548	-0.274	-0.411
Cs_ont_2g009370	turquoise	0.275	0.55	0.413	-0.413	-0.55	0	0.138	-0.206	-0.206
Cs_ont_2g009410	turquoise	0.548	0.411	0.274	-0.137	-0.274	0	0.137	-0.548	-0.411
Cs_ont_2g009440	turquoise	0.411	0.548	0.274	-0.411	-0.137	-0.548	0	-0.274	0.137
Cs_ont_2g009600	turquoise	0.411	0.274	0.548	-0.411	-0.137	0.137	0	-0.274	-0.548
Cs_ont_2g009620	turquoise	0.411	0.274	0.548	-0.411	-0.137	-0.548	0	-0.274	0.137
Cs_ont_2g009740	turquoise	0	0.411	0.548	0.137	-0.411	-0.274	-0.548	-0.137	0.274
Cs_ont_2g009960	turquoise	0.411	0.274	0.548	-0.411	0.137	-0.274	-0.548	0	-0.137
Cs_ont_2g010040	turquoise	0.411	0.548	0.274	-0.274	-0.137	0.137	0	-0.411	-0.548
Cs_ont_2g010310	turquoise	0.548	0.411	0.274	0	0.137	-0.411	-0.548	-0.137	-0.274
Cs_ont_2g010390	turquoise	0.411	0.548	0.274	0	-0.548	-0.411	0.137	-0.274	-0.137
Cs_ont_2g010430	turquoise	0.274	0.548	0.411	-0.411	-0.274	-0.548	-0.137	0.137	0
Cs_ont_2g010470	turquoise	0.411	0.548	0.274	-0.137	-0.274	0	0.137	-0.411	-0.548
Cs_ont_2g010520	turquoise	0.548	0.274	0.411	0	0.137	-0.137	-0.274	-0.548	-0.411
Cs_ont_2g010560	turquoise	0.411	0.548	0.274	0.137	0	-0.411	-0.548	-0.274	-0.137
Cs_ont_2g010590	turquoise	0.411	0.274	0.548	-0.548	-0.137	0	0.137	-0.411	-0.274
Cs_ont_2g010690	turquoise	0.411	0.548	0.274	0.137	0	-0.137	-0.548	-0.411	-0.274
Cs_ont_2g010760	turquoise	0.411	0.274	0.548	-0.274	0.137	0	-0.137	-0.411	-0.548
Cs_ont_2g010780	turquoise	0.548	0.411	0.137	-0.411	-0.137	0.274	0	-0.274	-0.548
Cs_ont_2g011130	turquoise	0.548	0.411	0.274	-0.411	-0.137	0	0.137	-0.274	-0.548
Cs_ont_2g011150	turquoise	0.411	0.548	0.137	-0.274	-0.548	-0.411	-0.137	0.274	0
Cs_ont_2g011170	turquoise	0.411	0.274	0.548	-0.411	-0.137	-0.548	0.137	0	-0.274
Cs_ont_2g011240	turquoise	0.411	0.548	0.274	0.137	-0.274	-0.137	0	-0.548	-0.411
Cs_ont_2g011250	turquoise	0.274	0.411	0.548	-0.411	-0.137	-0.548	0	0.137	-0.274
Cs_ont_2g011480	turquoise	0.411	0.548	0.274	-0.137	0.137	0	-0.411	-0.274	-0.548
Cs_ont_2g011550	turquoise	0.274	0.411	0.548	-0.548	0	-0.137	0.137	-0.274	-0.411
Cs_ont_2g012160	turquoise	0.274	0.411	0.548	-0.137	0.137	-0.274	-0.548	-0.411	0
Cs_ont_2g012490	turquoise	0.411	0.548	0.274	0.137	-0.137	-0.274	0	-0.548	-0.411
Cs_ont_2g012560	turquoise	0.411	0.548	0.274	-0.411	0	-0.274	0.137	-0.548	-0.137
Cs_ont_2g012870	turquoise	0.274	0.137	0.548	-0.274	-0.137	-0.411	0.411	-0.548	0
Cs_ont_2g012940	turquoise	0.411	0.274	0.548	-0.137	0.137	0	-0.274	-0.411	-0.548
Cs_ont_2g012990	turquoise	0.411	0.548	0.274	-0.411	0.137	-0.274	0	-0.548	-0.137
Cs_ont_2g013090	turquoise	0.411	0.548	0.274	0.137	-0.411	-0.137	-0.548	0	-0.274
Cs_ont_2g013120	turquoise	0.548	0.274	0.411	0.137	-0.137	0	-0.274	-0.411	-0.548
Cs_ont_2g013160	turquoise	0.137	0.411	0.274	-0.548	-0.411	-0.137	0.548	-0.274	0
Cs_ont_2g013190	turquoise	0.411	0.548	0.137	-0.411	0	-0.137	0.274	-0.548	-0.274
Cs_ont_2g013350	turquoise	0.411	0.274	0.548	-0.548	0	-0.137	0.137	-0.411	-0.274
Cs_ont_2g013410	turquoise	0.411	0.548	0.274	-0.137	0.137	-0.274	-0.411	0	-0.548
Cs_ont_2g013540	turquoise	0.548	0.274	0.411	-0.274	-0.411	-0.548	-0.137	0.137	0
Cs_ont_2g013640	turquoise	0.548	0.274	0.411	-0.274	-0.411	0.137	0	-0.137	-0.548
Cs_ont_2g013730	turquoise	0.411	0.274	0.548	0.137	-0.137	0	-0.274	-0.548	-0.411
Cs_ont_2g013740	turquoise	0.411	0.548	0.274	-0.274	-0.548	-0.137	0	-0.411	0.137
Cs_ont_2g013790	turquoise	0.411	0.548	0.274	-0.137	-0.411	0	-0.548	0.137	-0.274
Cs_ont_2g013950	turquoise	0.411	0.274	0.548	-0.274	0	0.137	-0.411	-0.137	-0.548
Cs_ont_2g014090	turquoise	0.548	0.411	0.274	-0.137	0.137	0	-0.274	-0.411	-0.548
Cs_ont_2g014170	turquoise	0.411	0.274	0.548	0	0.137	-0.548	-0.274	-0.411	-0.137
Cs_ont_2g014270	turquoise	0.55	0.413	0.275	-0.344	0	-0.138	0.138	-0.55	-0.344
Cs_ont_2g014300	turquoise	0.411	0.274	0.548	0	-0.137	0.137	-0.274	-0.411	-0.548
Cs_ont_2g014620	turquoise	0.548	0.411	0.274	-0.548	-0.411	-0.137	0.137	-0.274	0
Cs_ont_2g014910	turquoise	0.548	0.274	0.411	-0.137	0.137	0	-0.548	-0.411	-0.274
Cs_ont_2g014980	turquoise	0.411	0.274	0.548	-0.548	-0.274	0	0.137	-0.137	-0.411
Cs_ont_2g015020	turquoise	0.411	0.548	0.274	0.137	-0.274	-0.137	0	-0.548	-0.411
Cs_ont_2g015030	turquoise	0.274	0.411	0.548	-0.411	-0.274	-0.548	-0.137	0	0.137
Cs_ont_2g015040	turquoise	0.548	0.411	0.274	-0.548	-0.411	0	-0.137	0.137	-0.274
Cs_ont_2g015280	turquoise	0.411	0.548	0.274	-0.411	-0.548	-0.137	0	0.137	-0.274
Cs_ont_2g015440	turquoise	0.411	0.548	0.274	0.137	-0.548	-0.274	-0.137	-0.411	0
Cs_ont_2g015450	turquoise	0.274	0.548	0.137	0.411	0	-0.137	-0.274	-0.411	-0.548
Cs_ont_2g015480	turquoise	0.411	0.548	0.274	-0.137	-0.548	-0.411	0	0.137	-0.274
Cs_ont_2g015490	turquoise	0.411	0.548	0.274	-0.411	-0.137	0	0.137	-0.548	-0.274
Cs_ont_2g015810	turquoise	0.411	0.548	0.274	0	-0.411	-0.548	-0.274	0.137	-0.137
Cs_ont_2g015930	turquoise	0.414	0.552	0.276	-0.483	-0.207	0	0.138	-0.207	-0.483
Cs_ont_2g016170	turquoise	0.411	0.548	0.137	0	-0.411	0.274	-0.274	-0.137	-0.548
Cs_ont_2g016410	turquoise	0.548	0.411	0.274	-0.548	-0.411	-0.274	0.137	0	-0.137
Cs_ont_2g016420	turquoise	0.548	0.411	0.274	-0.411	-0.548	-0.274	-0.137	0	0.137
Cs_ont_2g016540	turquoise	0.411	0.548	0.137	0.274	0	-0.274	-0.548	-0.411	-0.137
Cs_ont_2g016590	turquoise	0.548	0.411	0.274	0.137	-0.137	-0.274	0	-0.548	-0.411
Cs_ont_2g016760	turquoise	0.411	0.548	0.137	0.274	0	-0.137	-0.548	-0.411	-0.274
Cs_ont_2g017230	turquoise	0.548	0.274	0.411	0	0.137	-0.137	-0.548	-0.411	-0.274
Cs_ont_2g017390	turquoise	0.274	0.411	0.548	-0.137	0	0.137	-0.411	-0.274	-0.548
Cs_ont_2g017530	turquoise	0.411	0.274	0.548	-0.548	-0.274	0	0.137	-0.137	-0.411
Cs_ont_2g017780	turquoise	0.411	0.548	0.274	-0.274	0.137	-0.137	-0.411	-0.548	0
Cs_ont_2g017820	turquoise	0.548	0.411	0.274	-0.137	0.137	-0.548	0	-0.411	-0.274
Cs_ont_2g017970	turquoise	0.411	0.548	0.137	0	0.274	-0.274	-0.411	-0.548	-0.137
Cs_ont_2g018080	turquoise	0.548	0.411	0.274	0	-0.411	-0.274	-0.548	-0.137	0.137
Cs_ont_2g018230	turquoise	0.548	0.411	0.274	-0.548	-0.274	0	-0.137	-0.411	0.137
Cs_ont_2g018340	turquoise	0.411	0.274	0.548	-0.411	0.137	-0.137	0	-0.274	-0.548
Cs_ont_2g018370	turquoise	0.411	0.548	0.274	-0.411	0.137	0	-0.137	-0.274	-0.548
Cs_ont_2g018420	turquoise	0.548	0.411	0.274	-0.548	-0.411	0	0.137	-0.137	-0.274
Cs_ont_2g018460	turquoise	0.274	0.548	0.411	-0.274	-0.548	-0.411	0	-0.137	0.137
Cs_ont_2g018720	turquoise	0.548	0.411	0.274	0	-0.137	0.137	-0.548	-0.274	-0.411
Cs_ont_2g018750	turquoise	0.548	0.411	0.274	-0.411	0	-0.137	0.137	-0.274	-0.548
Cs_ont_2g018970	turquoise	0.411	0.548	0.274	-0.137	0.137	0	-0.411	-0.548	-0.274
Cs_ont_2g019150	turquoise	0.411	0.274	0.548	-0.274	-0.137	0	0.137	-0.411	-0.548
Cs_ont_2g019180	turquoise	0.548	0.411	0.274	-0.411	0.137	-0.137	0	-0.548	-0.274
Cs_ont_2g019240	turquoise	0.411	0.548	0.274	0.137	0	-0.137	-0.411	-0.274	-0.548
Cs_ont_2g019830	turquoise	0.274	0.411	0.548	0	-0.137	0.137	-0.274	-0.411	-0.548
Cs_ont_2g019960	turquoise	0.411	0.548	0.274	-0.137	0	-0.274	0.137	-0.411	-0.548
Cs_ont_2g020590	turquoise	0.274	0.548	0.411	0.137	-0.274	-0.548	0	-0.411	-0.137
Cs_ont_2g020690	turquoise	0.411	0.548	0.137	0.274	-0.137	-0.274	-0.548	-0.411	0
Cs_ont_2g020700	turquoise	0.274	0.411	0.548	-0.411	0.137	-0.274	0	-0.548	-0.137
Cs_ont_2g020730	turquoise	0.548	0.411	0	-0.411	-0.548	-0.274	0.274	0.137	-0.137
Cs_ont_2g020750	turquoise	0.411	0.548	0.137	0.274	-0.137	0	-0.411	-0.274	-0.548
Cs_ont_2g020770	turquoise	0.411	0.548	0.137	0.274	0	-0.137	-0.548	-0.274	-0.411
Cs_ont_2g021550	turquoise	0.548	0.411	0.274	-0.274	0	0.137	-0.137	-0.548	-0.411
Cs_ont_2g021640	turquoise	0.411	0.548	0.274	0.137	0	-0.137	-0.548	-0.411	-0.274
Cs_ont_2g021750	turquoise	0.411	0.548	0.274	0.137	-0.137	0	-0.274	-0.411	-0.548
Cs_ont_2g021840	turquoise	0.274	0.548	0.411	0	-0.411	-0.274	-0.548	-0.137	0.137
Cs_ont_2g021880	turquoise	0.411	0.548	0.274	-0.137	-0.274	0	0.137	-0.548	-0.411
Cs_ont_2g021890	turquoise	0.411	0.274	0.548	0	0.137	-0.137	-0.274	-0.411	-0.548
Cs_ont_2g022070	turquoise	0.411	0.274	0.548	-0.548	-0.137	0	0.137	-0.274	-0.411
Cs_ont_2g022380	turquoise	0.548	0.411	0.274	0.137	-0.137	-0.274	0	-0.548	-0.411
Cs_ont_2g022450	turquoise	0.411	0.548	0.274	-0.274	-0.137	0	0.137	-0.411	-0.548
Cs_ont_2g022480	turquoise	0.411	0.548	0.274	-0.137	0.137	0	-0.274	-0.411	-0.548
Cs_ont_2g022750	turquoise	0.548	0.411	0.274	0.137	-0.274	-0.411	-0.137	-0.548	0
Cs_ont_2g022930	turquoise	0.274	0.548	0.411	-0.137	0	-0.548	-0.274	0.137	-0.411
Cs_ont_2g023020	turquoise	0.548	0.411	0.137	0.274	-0.274	-0.137	0	-0.411	-0.548
Cs_ont_2g023230	turquoise	0.411	0.548	0.274	-0.411	-0.548	-0.274	-0.137	0	0.137
Cs_ont_2g023240	turquoise	0.411	0.548	0.274	-0.274	0	0.137	-0.137	-0.411	-0.548
Cs_ont_2g023310	turquoise	0.411	0.548	0.274	-0.274	-0.548	-0.411	-0.137	0	0.137
Cs_ont_2g023610	turquoise	0.274	0.548	0.411	0.137	0	-0.274	-0.411	-0.548	-0.137
Cs_ont_2g023650	turquoise	0.274	0.548	0.411	-0.548	0.137	-0.137	0	-0.411	-0.274
Cs_ont_2g023730	turquoise	0.138	0.55	0	-0.138	-0.275	-0.481	0.275	-0.481	0.413
Cs_ont_2g023740	turquoise	0.548	0.411	0.274	-0.548	-0.411	0	0.137	-0.274	-0.137
Cs_ont_2g023760	turquoise	0.137	0.274	0	-0.411	-0.274	-0.137	0.548	-0.548	0.411
Cs_ont_2g023810	turquoise	0.411	0.274	0.548	-0.274	0	0.137	-0.137	-0.411	-0.548
Cs_ont_2g024070	turquoise	0.411	0.548	0.274	0	-0.137	-0.411	0.137	-0.548	-0.274
Cs_ont_2g024100	turquoise	0.548	0.411	0.274	-0.548	-0.137	0	0.137	-0.274	-0.411
Cs_ont_2g024230	turquoise	0.548	0.274	0.411	-0.411	0	0.137	-0.137	-0.274	-0.548
Cs_ont_2g024260	turquoise	0.411	0.548	0.274	-0.411	-0.137	0.137	0	-0.274	-0.548
Cs_ont_2g024620	turquoise	0.411	0.274	0.548	-0.137	-0.274	0	0.137	-0.548	-0.411
Cs_ont_2g024670	turquoise	0.548	0.411	0.274	-0.548	0	-0.411	0.137	-0.137	-0.274
Cs_ont_2g024870	turquoise	0.411	0.548	0.274	0.137	-0.274	-0.411	-0.548	-0.137	0
Cs_ont_2g024970	turquoise	0.411	0.274	0.548	0.137	0	-0.274	-0.548	-0.411	-0.137
Cs_ont_2g025020	turquoise	0.548	0.411	0.274	0	-0.274	-0.411	-0.548	-0.137	0.137
Cs_ont_2g025270	turquoise	0.411	0.274	0.548	-0.548	-0.274	-0.137	0.137	-0.411	0
Cs_ont_2g025340	turquoise	0.274	0.548	0.411	-0.411	0	-0.137	0.137	-0.548	-0.274
Cs_ont_2g025570	turquoise	0.274	0.548	0.411	0.137	-0.274	-0.411	-0.548	0	-0.137
Cs_ont_2g025620	turquoise	0.411	0.274	0.548	-0.274	0.137	0	-0.137	-0.548	-0.411
Cs_ont_2g025700	turquoise	0.411	0.274	0.548	-0.137	0.137	0	-0.411	-0.548	-0.274
Cs_ont_2g025730	turquoise	0.274	0.411	0.548	0	0.137	-0.137	-0.274	-0.548	-0.411
Cs_ont_2g025930	turquoise	0.274	0.137	0.548	-0.548	0	-0.411	0.411	-0.274	-0.137
Cs_ont_2g026790	turquoise	0.411	0.548	0.274	0	-0.274	0.137	-0.548	-0.137	-0.411
Cs_ont_2g027040	turquoise	0.548	0.411	0.274	-0.548	-0.411	0.137	-0.274	-0.137	0
Cs_ont_2g027600	turquoise	0.411	0.548	0.274	0	0.137	-0.274	-0.548	-0.411	-0.137
Cs_ont_2g027610	turquoise	0.411	0.274	0.548	0.137	-0.274	0	-0.411	-0.137	-0.548
Cs_ont_2g027700	turquoise	0.411	0.548	0.274	0.137	-0.274	-0.137	0	-0.548	-0.411
Cs_ont_2g028110	turquoise	0.548	0.411	0.274	-0.411	0	-0.274	-0.548	0.137	-0.137
Cs_ont_2g028210	turquoise	0.411	0.274	0.548	-0.411	0	-0.137	-0.274	0.137	-0.548
Cs_ont_2g028350	turquoise	0.548	0.411	0.274	-0.274	0.137	0	-0.548	-0.411	-0.137
Cs_ont_2g028380	turquoise	0.274	0.411	0.548	-0.274	0.137	-0.137	0	-0.411	-0.548
Cs_ont_2g028450	turquoise	0.548	0.274	0.411	-0.274	0	-0.137	0.137	-0.411	-0.548
Cs_ont_2g028460	turquoise	0.274	0.548	0.411	-0.274	0.137	-0.411	-0.548	0	-0.137
Cs_ont_2g028470	turquoise	0	0.274	0.137	-0.548	-0.137	-0.274	0.548	-0.411	0.411
Cs_ont_2g028690	turquoise	0.548	0.411	0.274	-0.274	-0.411	0.137	0	-0.548	-0.137
Cs_ont_2g028920	turquoise	0.411	0.274	0.548	-0.274	0	0.137	-0.137	-0.548	-0.411
Cs_ont_2g029130	turquoise	0.411	0.548	0.274	0.137	0	-0.137	-0.548	-0.274	-0.411
Cs_ont_2g029270	turquoise	0.411	0.548	0.274	0.137	-0.548	-0.411	-0.274	0	-0.137
Cs_ont_2g029310	turquoise	0.411	0.548	0.274	0.137	0	-0.137	-0.548	-0.274	-0.411
Cs_ont_2g029700	turquoise	0.275	0.413	0.55	-0.0688	0.138	-0.275	-0.55	-0.413	-0.0688
Cs_ont_2g029770	turquoise	0.411	0.137	0.274	-0.274	0.548	0	-0.411	-0.548	-0.137
Cs_ont_2g029970	turquoise	0.548	0.274	0.411	0	0.137	-0.137	-0.548	-0.411	-0.274
Cs_ont_2g030190	turquoise	0.413	0.55	0.275	-0.138	-0.413	-0.275	-0.55	0.0688	0.0688
Cs_ont_2g030250	turquoise	0.548	0.411	0.274	-0.137	0.137	0	-0.411	-0.548	-0.274
Cs_ont_2g030260	turquoise	0.411	0.548	0.274	0	-0.137	0.137	-0.274	-0.411	-0.548
Cs_ont_2g030440	turquoise	0.411	0.548	0.137	-0.274	-0.548	-0.137	-0.411	0.274	0
Cs_ont_2g030820	turquoise	0.548	0.274	0.411	-0.274	-0.548	-0.411	-0.137	0	0.137
Cs_ont_2g031330	turquoise	0.411	0.548	0.274	-0.137	-0.274	-0.411	-0.548	0	0.137
Cs_ont_2g031340	turquoise	0.411	0.274	0.548	0.137	0	-0.137	-0.548	-0.411	-0.274
Cs_ont_2g031410	turquoise	0.418	0.279	0.139	-0.418	0	-0.418	0.557	-0.418	-0.139
Cs_ont_2g031540	turquoise	0.411	0.548	0.274	0.137	0	-0.411	-0.548	-0.137	-0.274
Cs_ont_2g031580	turquoise	0.411	0.548	0.274	-0.274	-0.137	0.137	0	-0.411	-0.548
Cs_ont_2g031670	turquoise	0.411	0.548	0.274	0.137	0	-0.411	-0.548	-0.274	-0.137
Cs_ont_2g031710	turquoise	0.274	0.411	0.548	-0.137	0.137	0	-0.274	-0.548	-0.411
Cs_ont_2g032080	turquoise	0.411	0.548	0.137	0.274	-0.274	0	-0.548	-0.137	-0.411
Cs_ont_2g032230	turquoise	0.411	0.548	0.274	-0.137	0.137	0	-0.274	-0.411	-0.548
Cs_ont_2g032290	turquoise	0.411	0.274	0.548	-0.137	0.137	0	-0.274	-0.548	-0.411
Cs_ont_2g032300	turquoise	0.274	0.411	0.548	-0.274	-0.137	0	0.137	-0.411	-0.548
Cs_ont_2g032640	turquoise	0.411	0.548	0.274	-0.274	-0.137	0	0.137	-0.411	-0.548
Cs_ont_2g032790	turquoise	0.411	0.274	0.548	-0.137	-0.274	0	0.137	-0.411	-0.548
Cs_ont_2g032800	turquoise	0.548	0.137	0.411	-0.274	-0.137	-0.411	0.274	-0.548	0
Cs_ont_2g032810	turquoise	0.274	0.548	0.411	-0.137	-0.548	0.137	-0.274	0	-0.411
Cs_ont_2g033070	turquoise	0.274	0.411	0.548	-0.548	-0.274	-0.411	0	0.137	-0.137
Cs_ont_2g033080	turquoise	0.411	0.548	0.274	-0.274	-0.137	0	0.137	-0.548	-0.411
Cs_ont_2g033110	turquoise	0.274	0.411	0.548	-0.548	-0.137	-0.411	0.137	0	-0.274
Cs_ont_2g033150	turquoise	0.411	0.548	0.274	-0.274	-0.137	0.137	0	-0.548	-0.411
Cs_ont_2g033160	turquoise	0.548	0.274	0.411	-0.548	0.137	-0.137	0	-0.274	-0.411
Cs_ont_2g033170	turquoise	0.548	0.411	0.274	-0.411	-0.137	0	0.137	-0.274	-0.548
Cs_ont_2g033300	turquoise	0.548	0.411	0.274	0.137	-0.274	-0.411	-0.137	-0.548	0
Cs_ont_2g033630	turquoise	0.411	0.274	0.548	-0.137	0.137	0	-0.274	-0.411	-0.548
Cs_ont_2g033680	turquoise	0.411	0.274	0.548	0	0.137	-0.137	-0.274	-0.548	-0.411
Cs_ont_2g033760	turquoise	0.548	0.411	0.274	0.137	-0.274	-0.137	-0.548	-0.411	0
Cs_ont_2g033980	turquoise	0.548	0.274	0.411	-0.274	0	-0.137	0.137	-0.548	-0.411
Cs_ont_2g033990	turquoise	0.548	0.137	0.274	-0.411	-0.274	-0.137	0.411	-0.548	0
Cs_ont_2g034170	turquoise	0.411	0.548	0.274	0.137	0	-0.411	-0.548	-0.274	-0.137
Cs_ont_2g034410	turquoise	0.548	0.411	0.274	-0.274	0.137	-0.137	0	-0.411	-0.548
Cs_ont_2g034510	turquoise	0.274	0.411	0.548	0	0.137	-0.137	-0.548	-0.411	-0.274
Cs_ont_2g034540	turquoise	0.411	0.548	0.274	0	0.137	-0.274	-0.137	-0.411	-0.548
Cs_ont_2g035000	turquoise	0.411	0.548	0.274	0	0.137	-0.137	-0.411	-0.548	-0.274
Cs_ont_2g035010	turquoise	0.411	0.274	0.548	-0.137	0.137	0	-0.411	-0.548	-0.274
Cs_ont_2g035030	turquoise	0.552	0.414	0.276	0	0.138	-0.207	-0.483	-0.483	-0.207
Cs_ont_2g035090	turquoise	0.548	0.411	0.274	-0.137	0.137	0	-0.411	-0.548	-0.274
Cs_ont_2g035190	turquoise	0.548	0.411	0.274	-0.548	-0.411	0	0.137	-0.137	-0.274
Cs_ont_2g035550	turquoise	0.274	0.548	0.411	0.137	0	-0.137	-0.548	-0.274	-0.411
Cs_ont_2g035580	turquoise	0.548	0.274	0.411	-0.137	0.137	0	-0.411	-0.274	-0.548
Cs_ont_3g000070	turquoise	0.139	0.557	0.418	0	-0.139	0.279	-0.418	-0.418	-0.418
Cs_ont_3g000280	turquoise	0.137	0.411	0.548	-0.548	-0.274	-0.411	-0.137	0.274	0
Cs_ont_3g000320	turquoise	0.411	0.548	0.274	0	0.137	-0.274	-0.548	-0.137	-0.411
Cs_ont_3g000380	turquoise	0.411	0.548	0.274	-0.274	0.137	0	-0.137	-0.548	-0.411
Cs_ont_3g000450	turquoise	0.411	0.548	0.274	-0.274	0	0.137	-0.137	-0.411	-0.548
Cs_ont_3g000550	turquoise	0.411	0.548	0.274	-0.137	0.137	0	-0.548	-0.411	-0.274
Cs_ont_3g000570	turquoise	0.411	0.548	0.274	-0.548	-0.274	-0.137	0.137	0	-0.411
Cs_ont_3g000730	turquoise	0.274	0.548	0.411	0.137	-0.137	-0.274	-0.411	-0.548	0
Cs_ont_3g000860	turquoise	0.411	0.548	0.274	0.137	-0.274	0	-0.548	-0.137	-0.411
Cs_ont_3g000890	turquoise	0.413	0.275	0.55	-0.55	-0.206	-0.413	0.138	-0.206	0
Cs_ont_3g001040	turquoise	0.411	0.548	0.274	-0.274	-0.137	0.137	0	-0.411	-0.548
Cs_ont_3g001110	turquoise	0.411	0.548	0.274	-0.274	-0.137	0	0.137	-0.548	-0.411
Cs_ont_3g001400	turquoise	0.414	0.552	0.207	0.207	0	-0.138	-0.276	-0.483	-0.483
Cs_ont_3g001500	turquoise	0.274	0.548	0.411	-0.137	0.137	0	-0.411	-0.274	-0.548
Cs_ont_3g001510	turquoise	0.411	0.548	0.274	0	-0.137	0.137	-0.411	-0.274	-0.548
Cs_ont_3g001590	turquoise	0.411	0.548	0.274	0.137	-0.137	0	-0.548	-0.274	-0.411
Cs_ont_3g001740	turquoise	0.137	0.274	0.411	-0.548	-0.411	-0.274	0.548	-0.137	0
Cs_ont_3g002030	turquoise	0.411	0.548	0.274	-0.274	-0.411	-0.137	0.137	0	-0.548
Cs_ont_3g002080	turquoise	0.411	0.548	0.274	-0.411	0	-0.137	0.137	-0.548	-0.274
Cs_ont_3g002470	turquoise	0.411	0.274	0.548	-0.411	-0.274	0.137	-0.137	0	-0.548
Cs_ont_3g002500	turquoise	0.411	0.548	0.274	0	-0.137	0.137	-0.548	-0.274	-0.411
Cs_ont_3g002510	turquoise	0.411	0.274	0.548	-0.548	-0.137	0.137	-0.411	0	-0.274
Cs_ont_3g002550	turquoise	0.548	0.411	0.274	-0.548	-0.274	0.137	0	-0.137	-0.411
Cs_ont_3g002720	turquoise	0.548	0.411	0.274	-0.411	-0.274	-0.137	0.137	-0.548	0
Cs_ont_3g002850	turquoise	0.274	0.411	0.548	-0.411	0	-0.137	0.137	-0.274	-0.548
Cs_ont_3g002970	turquoise	0.413	0.55	0.275	-0.138	-0.55	-0.344	0	0.138	-0.344
Cs_ont_3g003050	turquoise	0.548	0.274	0.411	0	-0.137	-0.274	-0.548	-0.411	0.137
Cs_ont_3g003100	turquoise	0.411	0.548	0.274	-0.548	-0.137	-0.411	0.137	-0.274	0
Cs_ont_3g003310	turquoise	0.274	0.548	0.411	0.137	0	-0.137	-0.274	-0.548	-0.411
Cs_ont_3g003530	turquoise	0.138	0.413	0.55	0.275	-0.275	-0.0688	-0.0688	-0.55	-0.413
Cs_ont_3g003550	turquoise	0.274	0.548	0.411	-0.274	0.137	-0.411	0	-0.548	-0.137
Cs_ont_3g003800	turquoise	0.548	0.274	0.411	-0.548	-0.274	0	0.137	-0.137	-0.411
Cs_ont_3g003850	turquoise	0.413	0.275	0.55	-0.481	0	-0.138	0.138	-0.275	-0.481
Cs_ont_3g003920	turquoise	0.548	0.411	0.274	0	0.137	-0.137	-0.274	-0.548	-0.411
Cs_ont_3g003950	turquoise	0.411	0.548	0.274	0.137	0	-0.411	-0.548	-0.137	-0.274
Cs_ont_3g004230	turquoise	0.411	0.274	0.548	-0.274	0.137	0	-0.548	-0.411	-0.137
Cs_ont_3g004300	turquoise	0.411	0.548	0.274	-0.548	-0.411	-0.274	0.137	-0.137	0
Cs_ont_3g004590	turquoise	0.548	0.411	0.274	0	0.137	-0.274	-0.548	-0.411	-0.137
Cs_ont_3g004600	turquoise	0.411	0.274	0.548	-0.548	-0.274	-0.411	0	-0.137	0.137
Cs_ont_3g004610	turquoise	0.548	0.274	0.411	-0.411	-0.137	0.137	0	-0.274	-0.548
Cs_ont_3g004930	turquoise	0.274	0.548	0.411	-0.548	0	0.137	-0.274	-0.411	-0.137
Cs_ont_3g004950	turquoise	0.411	0.548	0.274	0.137	0	-0.274	-0.548	-0.137	-0.411
Cs_ont_3g005050	turquoise	0.548	0.411	0.274	-0.274	-0.548	0	0.137	-0.411	-0.137
Cs_ont_3g005120	turquoise	0.548	0.274	0.411	-0.411	-0.548	0	0.137	-0.274	-0.137
Cs_ont_3g005320	turquoise	0.274	0.548	0.411	-0.411	-0.274	0	0.137	-0.548	-0.137
Cs_ont_3g005550	turquoise	0.411	0.274	0.548	-0.274	0.137	-0.137	0	-0.548	-0.411
Cs_ont_3g005590	turquoise	0.274	0.411	0.548	0.137	0	-0.137	-0.411	-0.274	-0.548
Cs_ont_3g005650	turquoise	0.413	0.275	0.55	0	0.138	-0.413	-0.55	-0.206	-0.206
Cs_ont_3g005660	turquoise	0.548	0.274	0.411	-0.274	0.137	-0.137	-0.548	-0.411	0
Cs_ont_3g006060	turquoise	0.274	0.411	0.548	0	-0.137	0.137	-0.548	-0.411	-0.274
Cs_ont_3g006110	turquoise	0.548	0	0.411	-0.548	0.137	0.274	-0.137	-0.274	-0.411
Cs_ont_3g006140	turquoise	0.137	0.274	0.411	-0.411	-0.548	-0.137	0.548	0	-0.274
Cs_ont_3g006210	turquoise	0.548	0.411	0.274	-0.411	-0.137	0	0.137	-0.274	-0.548
Cs_ont_3g006350	turquoise	0.411	0.548	0.274	0.137	0	-0.137	-0.548	-0.274	-0.411
Cs_ont_3g006480	turquoise	0.411	0.548	0.274	0	-0.137	0.137	-0.411	-0.274	-0.548
Cs_ont_3g006500	turquoise	0.548	0.274	0.411	0	-0.274	-0.411	-0.548	-0.137	0.137
Cs_ont_3g006520	turquoise	0.274	0.411	0.548	-0.274	0.137	-0.137	-0.411	-0.548	0
Cs_ont_3g006560	turquoise	0.411	0.548	0.274	-0.411	0	-0.137	0.137	-0.548	-0.274
Cs_ont_3g006730	turquoise	0.548	0.411	0.274	-0.548	0	-0.137	0.137	-0.411	-0.274
Cs_ont_3g006800	turquoise	0.411	0.548	0.274	0.137	0	-0.137	-0.548	-0.411	-0.274
Cs_ont_3g007180	turquoise	0.411	0.548	0.274	-0.274	-0.137	0	0.137	-0.411	-0.548
Cs_ont_3g007260	turquoise	0.274	0.411	0.548	0.137	0	-0.137	-0.548	-0.411	-0.274
Cs_ont_3g007330	turquoise	0.411	0.548	0.274	-0.137	-0.411	0	0.137	-0.274	-0.548
Cs_ont_3g007580	turquoise	0.548	0.274	0.411	0	0.137	-0.137	-0.548	-0.411	-0.274
Cs_ont_3g007700	turquoise	0.411	0.548	0.274	0	-0.548	0.137	-0.137	-0.274	-0.411
Cs_ont_3g007830	turquoise	0.548	0.411	0.274	-0.274	0.137	-0.137	0	-0.548	-0.411
Cs_ont_3g007910	turquoise	0.274	0.548	0.411	0	-0.137	0.137	-0.411	-0.274	-0.548
Cs_ont_3g008140	turquoise	0.429	0.572	0.286	0	-0.358	-0.358	-0.358	0.143	-0.358
Cs_ont_3g008370	turquoise	0.411	0.548	0.274	0.137	-0.137	0	-0.411	-0.274	-0.548
Cs_ont_3g008440	turquoise	0.411	0.548	0.274	0	-0.137	0.137	-0.411	-0.274	-0.548
Cs_ont_3g008460	turquoise	0.137	0.548	0.411	0.274	-0.137	-0.274	-0.548	-0.411	0
Cs_ont_3g008610	turquoise	0.411	0.548	0.274	-0.411	0.137	-0.548	-0.274	-0.137	0
Cs_ont_3g008730	turquoise	0.548	0.411	0.137	-0.274	-0.411	-0.548	0.274	-0.137	0
Cs_ont_3g008920	turquoise	0.411	0.548	0.274	-0.274	-0.137	0	0.137	-0.548	-0.411
Cs_ont_3g008940	turquoise	0.275	0.413	0.55	-0.55	-0.275	-0.0688	0.138	-0.413	-0.0688
Cs_ont_3g009080	turquoise	0.548	0.411	0.274	-0.411	0	-0.274	0.137	-0.548	-0.137
Cs_ont_3g009150	turquoise	0.274	0.411	0.137	-0.548	-0.137	-0.274	0.548	-0.411	0
Cs_ont_3g009170	turquoise	0.411	0.137	0.548	-0.411	0	0.274	-0.548	-0.137	-0.274
Cs_ont_3g009180	turquoise	0.411	0.548	0.274	0.137	-0.274	-0.411	0	-0.548	-0.137
Cs_ont_3g009290	turquoise	0.548	0.411	0.274	-0.411	-0.548	0	-0.137	0.137	-0.274
Cs_ont_3g009300	turquoise	0.411	0.548	0.274	0.137	-0.274	0	-0.548	-0.137	-0.411
Cs_ont_3g009330	turquoise	0.411	0.548	0.274	0	0.137	-0.137	-0.274	-0.548	-0.411
Cs_ont_3g009340	turquoise	0.411	0.548	0.274	0.137	0	-0.274	-0.548	-0.411	-0.137
Cs_ont_3g009350	turquoise	0.411	0.548	0.274	-0.137	0.137	0	-0.411	-0.274	-0.548
Cs_ont_3g009380	turquoise	0.411	0.548	0.274	-0.411	0	0.137	-0.137	-0.548	-0.274
Cs_ont_3g009420	turquoise	0.274	0.548	0.411	-0.548	0	-0.274	0.137	-0.411	-0.137
Cs_ont_3g009430	turquoise	0.548	0.274	0.411	-0.137	0.137	0	-0.274	-0.548	-0.411
Cs_ont_3g009820	turquoise	0.548	0.411	0.137	-0.548	-0.411	-0.274	0.274	0	-0.137
Cs_ont_3g009940	turquoise	0.411	0.548	0.274	-0.274	0.137	-0.411	0	-0.548	-0.137
Cs_ont_3g010160	turquoise	0.411	0.274	0.548	0	0.137	-0.137	-0.411	-0.274	-0.548
Cs_ont_3g010180	turquoise	0.274	0.548	0.411	-0.548	0.137	-0.274	-0.137	-0.411	0
Cs_ont_3g010480	turquoise	0.411	0.274	0.548	-0.548	0.137	0	-0.137	-0.411	-0.274
Cs_ont_3g010540	turquoise	0.137	0.548	0.411	0	-0.274	0.274	-0.137	-0.548	-0.411
Cs_ont_3g010590	turquoise	0.411	0.137	0.548	-0.137	0.274	0	-0.411	-0.548	-0.274
Cs_ont_3g010890	turquoise	0.275	0.55	0.413	-0.344	-0.55	-0.344	0	0.138	-0.138
Cs_ont_3g011290	turquoise	0.411	0.548	0.274	0	-0.137	-0.274	0.137	-0.548	-0.411
Cs_ont_3g011420	turquoise	0.411	0.548	0.274	0	-0.274	-0.137	0.137	-0.548	-0.411
Cs_ont_3g011650	turquoise	0.137	0.274	0.411	-0.548	-0.137	-0.274	0.548	-0.411	0
Cs_ont_3g011980	turquoise	0.548	0.411	0.274	-0.548	-0.274	0	0.137	-0.137	-0.411
Cs_ont_3g011990	turquoise	0.411	0.548	0.274	-0.411	0	0.137	-0.137	-0.274	-0.548
Cs_ont_3g012060	turquoise	0.548	0.274	0.411	-0.411	-0.137	0	0.137	-0.274	-0.548
Cs_ont_3g012220	turquoise	0.411	0.548	0.274	-0.274	0.137	-0.137	0	-0.411	-0.548
Cs_ont_3g012240	turquoise	0.548	0.411	0.274	-0.411	0	-0.137	0.137	-0.274	-0.548
Cs_ont_3g012380	turquoise	0.411	0.274	0.548	-0.548	-0.274	-0.411	0	0.137	-0.137
Cs_ont_3g012730	turquoise	0.411	0.274	0.548	0	0.137	-0.137	-0.411	-0.274	-0.548
Cs_ont_3g012910	turquoise	0.548	0.411	0.137	-0.274	-0.548	-0.411	0	-0.137	0.274
Cs_ont_3g012950	turquoise	0.137	0.411	0	-0.411	0.548	0.274	-0.548	-0.274	-0.137
Cs_ont_3g012970	turquoise	0.548	0.411	0.274	-0.137	0.137	0	-0.548	-0.274	-0.411
Cs_ont_3g013100	turquoise	0.548	0.411	0.274	0.137	0	-0.274	-0.137	-0.548	-0.411
Cs_ont_3g013270	turquoise	0.411	0.274	0.548	-0.411	0.137	-0.137	0	-0.274	-0.548
Cs_ont_3g013470	turquoise	0	0.139	0.279	-0.418	-0.139	-0.418	0.557	-0.418	0.418
Cs_ont_3g013480	turquoise	0.274	0.548	0.411	-0.137	-0.274	0.137	0	-0.548	-0.411
Cs_ont_3g013580	turquoise	0.411	0.137	0.548	-0.274	-0.137	0.274	0	-0.411	-0.548
Cs_ont_3g013610	turquoise	0.274	0.411	0.548	0	0.137	-0.137	-0.274	-0.548	-0.411
Cs_ont_3g013630	turquoise	0.411	0.274	0.548	-0.411	0	-0.137	0.137	-0.548	-0.274
Cs_ont_3g013690	turquoise	0.274	0.548	0.411	-0.137	0.137	0	-0.548	-0.274	-0.411
Cs_ont_3g013700	turquoise	0.274	0.411	0.548	0	0.137	-0.274	-0.548	-0.137	-0.411
Cs_ont_3g013710	turquoise	0.137	0.411	0.548	0	0.274	-0.274	-0.137	-0.548	-0.411
Cs_ont_3g013740	turquoise	0.548	0.411	0.274	-0.274	-0.137	0	0.137	-0.548	-0.411
Cs_ont_3g013800	turquoise	0.413	0.55	0.275	-0.138	-0.481	0.138	0	-0.481	-0.275
Cs_ont_3g013830	turquoise	0.548	0.411	0.274	-0.411	-0.274	-0.137	0.137	-0.548	0
Cs_ont_3g013890	turquoise	0.411	0.548	0.137	0.274	-0.411	-0.274	-0.548	0	-0.137
Cs_ont_3g014020	turquoise	0.548	0.411	0.274	-0.137	-0.548	0	0.137	-0.274	-0.411
Cs_ont_3g014090	turquoise	0.411	0.548	0.274	0.137	0	-0.137	-0.548	-0.411	-0.274
Cs_ont_3g014130	turquoise	0.274	0	0.411	-0.411	-0.274	-0.137	0.548	-0.548	0.137
Cs_ont_3g014510	turquoise	0.411	0.274	0.548	-0.137	0	-0.411	0.137	-0.548	-0.274
Cs_ont_3g014520	turquoise	0.411	0.274	0.548	0.137	-0.137	0	-0.274	-0.411	-0.548
Cs_ont_3g014530	turquoise	0.411	0.274	0.548	-0.411	0	-0.274	0.137	-0.548	-0.137
Cs_ont_3g014770	turquoise	0.411	0.274	0.548	0	-0.137	0.137	-0.548	-0.274	-0.411
Cs_ont_3g014840	turquoise	0.55	0.413	0.275	-0.481	0.138	-0.138	0	-0.481	-0.275
Cs_ont_3g014850	turquoise	0.411	0.548	0.274	-0.548	-0.137	0	0.137	-0.274	-0.411
Cs_ont_3g015430	turquoise	0.548	0.411	0.274	-0.548	0	-0.274	0.137	-0.411	-0.137
Cs_ont_3g015500	turquoise	0.55	0.413	0.275	-0.344	0	-0.344	0.138	-0.55	-0.138
Cs_ont_3g015530	turquoise	0.274	0.411	0.548	-0.274	0.137	-0.137	0	-0.548	-0.411
Cs_ont_3g015540	turquoise	0.548	0.411	0.274	-0.548	0.137	-0.137	0	-0.274	-0.411
Cs_ont_3g016100	turquoise	0.548	0.411	0.274	-0.274	-0.137	0	-0.548	0.137	-0.411
Cs_ont_3g016160	turquoise	0.548	0.411	0.274	0.137	0	-0.274	-0.548	-0.137	-0.411
Cs_ont_3g016170	turquoise	0.411	0.548	0.274	-0.137	0	0.137	-0.274	-0.411	-0.548
Cs_ont_3g016380	turquoise	0.411	0.274	0.548	0.137	0	-0.137	-0.274	-0.548	-0.411
Cs_ont_3g016470	turquoise	0.411	0.548	0.274	-0.137	-0.274	0.137	0	-0.411	-0.548
Cs_ont_3g016610	turquoise	0.3	0.6	0.45	-0.3	0.15	-0.3	-0.3	-0.3	-0.3
Cs_ont_3g016850	turquoise	0.411	0.548	0.274	0	0.137	-0.274	-0.137	-0.411	-0.548
Cs_ont_3g016900	turquoise	0.274	0.548	0	0.411	-0.274	0.137	-0.137	-0.548	-0.411
Cs_ont_3g017300	turquoise	0.411	0.548	0.274	0.137	0	-0.137	-0.411	-0.548	-0.274
Cs_ont_3g017310	turquoise	0.411	0.548	0.274	0.137	0	-0.274	-0.548	-0.137	-0.411
Cs_ont_3g017540	turquoise	0.274	0.137	0.548	-0.137	0.411	0	-0.274	-0.548	-0.411
Cs_ont_3g018420	turquoise	0.411	0.548	0.274	0.137	-0.411	-0.274	-0.137	0	-0.548
Cs_ont_3g018730	turquoise	0.411	0.548	0.274	-0.411	-0.274	-0.548	0	-0.137	0.137
Cs_ont_3g018770	turquoise	0.274	0.411	0.548	0	-0.137	-0.411	-0.548	-0.274	0.137
Cs_ont_3g018780	turquoise	0.548	0.274	0.411	-0.411	0.137	-0.274	-0.137	0	-0.548
Cs_ont_3g018850	turquoise	0.548	0.411	0.274	0	-0.137	-0.548	-0.411	-0.274	0.137
Cs_ont_3g018910	turquoise	0.548	0.411	0.274	-0.548	0	-0.411	0.137	-0.137	-0.274
Cs_ont_3g018950	turquoise	0.411	0.548	0.274	-0.137	0.137	0	-0.274	-0.411	-0.548
Cs_ont_3g019070	turquoise	0.411	0.548	0.274	0.137	-0.411	-0.274	0	-0.137	-0.548
Cs_ont_3g019110	turquoise	0.274	0.548	0.411	0	0.137	-0.411	-0.548	-0.274	-0.137
Cs_ont_3g019200	turquoise	0.275	0.413	0.55	0.0688	0.0688	-0.413	-0.275	-0.55	-0.138
Cs_ont_3g019210	turquoise	0.411	0.548	0.274	-0.548	0	-0.274	0.137	-0.411	-0.137
Cs_ont_3g019370	turquoise	0.275	0.413	0.55	-0.275	-0.138	-0.481	-0.481	0	0.138
Cs_ont_3g019460	turquoise	0.411	0.548	0.274	0.137	0	-0.411	-0.548	-0.274	-0.137
Cs_ont_3g019520	turquoise	0.274	0.548	0.411	-0.411	0.137	0	-0.548	-0.274	-0.137
Cs_ont_3g019550	turquoise	0.274	0.411	0.548	0	0.137	-0.137	-0.548	-0.411	-0.274
Cs_ont_3g019780	turquoise	0.274	0.411	0.548	-0.274	0.137	0	-0.548	-0.137	-0.411
Cs_ont_3g020700	turquoise	0.274	0	0.548	-0.548	-0.411	-0.274	-0.137	0.137	0.411
Cs_ont_3g020760	turquoise	0.548	0.411	0.274	-0.137	0	-0.274	-0.548	0.137	-0.411
Cs_ont_3g020810	turquoise	0.274	0.548	0.411	-0.274	-0.548	-0.137	0.137	0	-0.411
Cs_ont_3g020840	turquoise	0.274	0.548	0.411	-0.274	-0.411	-0.548	0	-0.137	0.137
Cs_ont_3g020870	turquoise	0.411	0.548	0.274	0	0.137	-0.274	-0.411	-0.548	-0.137
Cs_ont_3g021420	turquoise	0.411	0.548	0.274	0.137	-0.274	0	-0.548	-0.137	-0.411
Cs_ont_3g021730	turquoise	0.274	0.548	0.411	0.137	-0.411	-0.274	-0.548	0	-0.137
Cs_ont_3g021860	turquoise	0.411	0.548	0.274	-0.548	-0.137	0.137	0	-0.274	-0.411
Cs_ont_3g022280	turquoise	0.274	0.548	0.411	-0.548	-0.137	-0.411	0.137	-0.274	0
Cs_ont_3g022300	turquoise	0.411	0.548	0.274	0.137	0	-0.411	-0.548	-0.274	-0.137
Cs_ont_3g022530	turquoise	0.274	0.548	0.411	-0.274	-0.548	0	0.137	-0.137	-0.411
Cs_ont_3g022540	turquoise	0.411	0.548	0.274	-0.137	-0.548	-0.411	0	0.137	-0.274
Cs_ont_3g022550	turquoise	0.274	0.548	0.411	-0.411	0	0.137	-0.137	-0.274	-0.548
Cs_ont_3g022700	turquoise	0.274	0.548	0.411	-0.411	0.137	-0.548	-0.137	-0.274	0
Cs_ont_3g022710	turquoise	0.411	0.548	0.274	0	-0.137	0.137	-0.411	-0.274	-0.548
Cs_ont_3g022970	turquoise	0.274	0.548	0.411	0	0.137	-0.274	-0.548	-0.411	-0.137
Cs_ont_3g023410	turquoise	0.411	0.274	0.548	-0.137	-0.274	0	0.137	-0.548	-0.411
Cs_ont_3g024130	turquoise	0.548	0.274	0.411	-0.411	-0.137	0	0.137	-0.548	-0.274
Cs_ont_3g024290	turquoise	0.55	0.138	0.275	-0.481	0.413	-0.481	0	-0.275	-0.138
Cs_ont_3g024350	turquoise	0.411	0.548	0.274	0.137	-0.274	-0.411	-0.548	0	-0.137
Cs_ont_3g024640	turquoise	0.411	0.274	0.548	-0.548	-0.274	-0.137	0.137	-0.411	0
Cs_ont_3g024800	turquoise	0.274	0.137	0.411	-0.274	0	-0.411	0.548	-0.548	-0.137
Cs_ont_3g024840	turquoise	0.557	0.279	0.418	-0.418	0.139	-0.418	-0.139	-0.418	0
Cs_ont_3g024970	turquoise	0.411	0.548	0.274	0.137	-0.137	-0.274	-0.548	0	-0.411
Cs_ont_3g025070	turquoise	0.548	0.274	0.411	-0.411	0	-0.137	0.137	-0.548	-0.274
Cs_ont_3g025450	turquoise	0.411	0.274	0.548	-0.411	0	-0.274	-0.137	-0.548	0.137
Cs_ont_3g025480	turquoise	0.418	0.557	0.279	-0.418	-0.418	-0.139	0	-0.418	0.139
Cs_ont_3g025570	turquoise	0.413	0.275	0.55	-0.481	-0.138	0	0.138	-0.275	-0.481
Cs_ont_3g025870	turquoise	0.548	0.411	0.274	-0.548	-0.137	-0.274	0	-0.411	0.137
Cs_ont_3g026320	turquoise	0.548	0.274	0.411	-0.274	0	-0.411	0.137	-0.548	-0.137
Cs_ont_3g026460	turquoise	0.429	0.572	0.286	-0.358	0.143	-0.358	0	-0.358	-0.358
Cs_ont_3g026720	turquoise	0.548	0.411	0.274	-0.274	0.137	0	-0.137	-0.411	-0.548
Cs_ont_3g026790	turquoise	0.274	0.411	0.548	0.137	0	-0.274	-0.548	-0.411	-0.137
Cs_ont_3g027130	turquoise	0.413	0.55	0.275	0.0688	0.0688	-0.413	-0.55	-0.275	-0.138
Cs_ont_3g027250	turquoise	0.137	0.411	0.548	-0.548	-0.411	-0.274	0	-0.137	0.274
Cs_ont_3g027650	turquoise	0.274	0.411	0.548	0	0.137	-0.274	-0.548	-0.411	-0.137
Cs_ont_3g027820	turquoise	0.548	0.274	0.411	-0.411	-0.137	0	0.137	-0.548	-0.274
Cs_ont_3g028240	turquoise	0.274	0.548	0.411	0	0.137	-0.411	-0.548	-0.274	-0.137
Cs_ont_3g028280	turquoise	0.411	0.274	0.137	-0.548	0	-0.274	0.548	-0.411	-0.137
Cs_ont_3g028290	turquoise	0.548	0.411	0.274	-0.411	0.137	0	-0.548	-0.274	-0.137
Cs_ont_3g028710	turquoise	0.274	0.548	0.411	-0.137	-0.411	0.137	-0.548	0	-0.274
Cs_ont_3g029470	turquoise	0.274	0.411	0.548	0	-0.548	0.137	-0.411	-0.137	-0.274
Cs_ont_3g029920	turquoise	0.548	0.411	0.274	0.137	0	-0.137	-0.411	-0.548	-0.274
Cs_ont_3g030330	turquoise	0.274	0.411	0.548	-0.137	0.137	0	-0.548	-0.274	-0.411
Cs_ont_3g030380	turquoise	0.274	0.411	0.548	0	0.137	-0.137	-0.548	-0.274	-0.411
Cs_ont_3g030390	turquoise	0.275	0.413	0.55	0	0.138	-0.138	-0.481	-0.275	-0.481
Cs_ont_3g030410	turquoise	0.274	0.411	0.548	-0.137	0.137	0	-0.548	-0.411	-0.274
Cs_ont_3g030850	turquoise	0.411	0.548	0.274	0	-0.137	0.137	-0.274	-0.411	-0.548
Cs_ont_3g031000	turquoise	0.411	0.274	0.548	0	-0.137	0.137	-0.548	-0.274	-0.411
Cs_ont_3g031060	turquoise	0.411	0.548	0.274	-0.548	-0.137	0	-0.274	0.137	-0.411
Cs_ont_3g031280	turquoise	0.548	0.411	0.274	-0.274	-0.137	0	0.137	-0.548	-0.411
Cs_ont_3g031310	turquoise	0.274	0.137	0.411	-0.411	-0.137	-0.274	0.548	-0.548	0
Cs_ont_3g031500	turquoise	0.274	0.548	0.137	-0.411	-0.137	-0.274	0.411	-0.548	0
Cs_ont_3g032020	turquoise	0.137	0.548	0.411	-0.274	-0.137	-0.411	-0.548	0.274	0
Cs_ont_3g032110	turquoise	0.548	0.274	0.411	-0.274	0	-0.137	0.137	-0.548	-0.411
Cs_ont_3g032320	turquoise	0.411	0.548	0.274	0	-0.274	0.137	-0.137	-0.411	-0.548
Cs_ont_3g032430	turquoise	0.274	0.411	0.548	-0.411	0	-0.274	0.137	-0.548	-0.137
Cs_ont_3g032860	turquoise	0.411	0.548	0.274	-0.274	0	-0.137	0.137	-0.411	-0.548
Cs_ont_3g032970	turquoise	0.548	0.274	0.411	0.137	0	-0.137	-0.548	-0.411	-0.274
Cs_ont_3g032980	turquoise	0.274	0.548	0.411	-0.137	-0.274	0	0.137	-0.411	-0.548
Cs_ont_3g033170	turquoise	0.548	0.411	0.274	0.137	0	-0.274	-0.411	-0.137	-0.548
Cs_ont_3g033200	turquoise	0.411	0.274	0.548	0	0.137	-0.274	-0.548	-0.411	-0.137
Cs_ont_4g000450	turquoise	0.274	0.548	0.411	0.137	0	-0.274	-0.548	-0.411	-0.137
Cs_ont_4g000460	turquoise	0.274	0.411	0.548	0.137	0	-0.548	-0.411	-0.274	-0.137
Cs_ont_4g000930	turquoise	0.411	0.274	0.548	-0.274	0	0.137	-0.411	-0.137	-0.548
Cs_ont_4g001230	turquoise	0.548	0.137	0.411	-0.274	0	0.274	-0.137	-0.411	-0.548
Cs_ont_4g001470	turquoise	0.411	0.548	0.274	-0.274	-0.137	0	0.137	-0.411	-0.548
Cs_ont_4g001500	turquoise	0.274	0.137	0.411	-0.137	-0.411	-0.274	0.548	-0.548	0
Cs_ont_4g001520	turquoise	0.411	0.548	0.274	-0.548	-0.411	-0.137	0.137	-0.274	0
Cs_ont_4g001540	turquoise	0.548	0.411	0.274	-0.274	0.137	0	-0.548	-0.411	-0.137
Cs_ont_4g001660	turquoise	0.274	0.411	0.548	-0.411	0	0.137	-0.137	-0.274	-0.548
Cs_ont_4g002040	turquoise	0.548	0.411	0.274	-0.274	-0.137	0	0.137	-0.411	-0.548
Cs_ont_4g002280	turquoise	0.411	0.548	0.274	0.137	-0.274	0	-0.548	-0.137	-0.411
Cs_ont_4g002490	turquoise	0.274	0.548	0.411	-0.274	-0.548	-0.411	0	0.137	-0.137
Cs_ont_4g002870	turquoise	0.548	0.411	0.274	-0.274	-0.548	0	0.137	-0.411	-0.137
Cs_ont_4g002880	turquoise	0.548	0.411	0.274	-0.411	-0.137	0	0.137	-0.274	-0.548
Cs_ont_4g003010	turquoise	0.411	0.137	0.548	-0.548	-0.137	0	0.274	-0.411	-0.274
Cs_ont_4g003060	turquoise	0.274	0.137	0.411	-0.411	-0.274	-0.137	0.548	-0.548	0
Cs_ont_4g003130	turquoise	0.411	0.548	0.274	0	0.137	-0.411	-0.548	-0.137	-0.274
Cs_ont_4g003410	turquoise	0.286	0.429	0.572	-0.358	-0.358	-0.358	0.143	-0.358	0
Cs_ont_4g003420	turquoise	0.274	0.411	0.548	-0.548	-0.137	-0.411	0.137	-0.274	0
Cs_ont_4g003510	turquoise	0.411	0.548	0.137	-0.274	-0.411	-0.137	-0.548	0	0.274
Cs_ont_4g003520	turquoise	0.411	0.548	0.274	-0.274	-0.137	0	0.137	-0.411	-0.548
Cs_ont_4g003580	turquoise	0.411	0.548	0.274	0	-0.274	-0.137	0.137	-0.411	-0.548
Cs_ont_4g003820	turquoise	0.548	0.411	0.274	-0.548	-0.274	-0.411	0.137	-0.137	0
Cs_ont_4g003840	turquoise	0.411	0.274	0.548	-0.548	0.137	0	-0.274	-0.137	-0.411
Cs_ont_4g003900	turquoise	0.411	0.548	0.274	0.137	-0.411	-0.137	0	-0.274	-0.548
Cs_ont_4g003940	turquoise	0.411	0.137	0.548	-0.548	0.274	-0.137	0	-0.411	-0.274
Cs_ont_4g003980	turquoise	0.411	0.548	0.274	-0.274	-0.137	0.137	0	-0.411	-0.548
Cs_ont_4g004090	turquoise	0.548	0.411	-0.274	-0.411	-0.548	-0.137	0	0.137	0.274
Cs_ont_4g004260	turquoise	0.411	0.548	0.274	0.137	0	-0.137	-0.548	-0.411	-0.274
Cs_ont_4g004590	turquoise	0.274	0.411	0.137	-0.411	-0.548	0	0.548	-0.137	-0.274
Cs_ont_4g004750	turquoise	0.55	0.413	0.275	0.138	-0.0688	-0.0688	-0.55	-0.413	-0.275
Cs_ont_4g004940	turquoise	0.411	0.548	0.274	-0.274	0	0.137	-0.137	-0.411	-0.548
Cs_ont_4g005300	turquoise	0.548	0.411	0.274	-0.274	0	0.137	-0.137	-0.411	-0.548
Cs_ont_4g005440	turquoise	0.411	0.274	0.548	0	0.137	-0.137	-0.274	-0.411	-0.548
Cs_ont_4g005480	turquoise	0.411	0.548	0.274	0	0.137	-0.274	-0.548	-0.411	-0.137
Cs_ont_4g005490	turquoise	0.548	0.411	0.274	0.137	-0.137	0	-0.274	-0.411	-0.548
Cs_ont_4g005560	turquoise	0.548	0.274	0.411	-0.137	-0.274	0.137	-0.411	0	-0.548
Cs_ont_4g005590	turquoise	0	0.274	0.137	-0.274	-0.411	-0.548	-0.137	0.411	0.548
Cs_ont_4g005680	turquoise	0.411	0.548	0.137	-0.274	0.274	-0.137	0	-0.548	-0.411
Cs_ont_4g005760	turquoise	0.411	0.274	0.137	-0.411	-0.274	-0.137	0.548	-0.548	0
Cs_ont_4g005910	turquoise	0.411	0.548	0.274	0.137	-0.548	-0.274	0	-0.411	-0.137
Cs_ont_4g005940	turquoise	0.137	0.274	0.411	-0.137	-0.274	-0.411	0.548	-0.548	0
Cs_ont_4g005960	turquoise	0.411	0.548	0.274	0.137	-0.137	0	-0.548	-0.274	-0.411
Cs_ont_4g006470	turquoise	0.411	0.274	0.137	-0.137	0.548	0	-0.274	-0.548	-0.411
Cs_ont_4g006520	turquoise	0.411	0.274	0.548	-0.548	-0.411	0.137	0	-0.137	-0.274
Cs_ont_4g006620	turquoise	0.274	0.411	0.548	0	-0.274	0.137	-0.548	-0.137	-0.411
Cs_ont_4g007100	turquoise	0.411	0.548	0.274	-0.274	0	-0.137	0.137	-0.411	-0.548
Cs_ont_4g007160	turquoise	0.275	0.413	0.55	-0.481	0	-0.275	-0.481	0.138	-0.138
Cs_ont_4g007240	turquoise	0.548	0.274	0.411	-0.548	0	-0.274	-0.137	-0.411	0.137
Cs_ont_4g007270	turquoise	0.411	0.274	0.548	-0.274	-0.137	0	0.137	-0.411	-0.548
Cs_ont_4g007470	turquoise	0.548	0.274	0.411	0.137	-0.137	0	-0.548	-0.274	-0.411
Cs_ont_4g007610	turquoise	0.274	0.411	0.548	0.137	-0.137	0	-0.274	-0.411	-0.548
Cs_ont_4g007940	turquoise	0.411	0.548	0.274	-0.274	-0.137	0	0.137	-0.411	-0.548
Cs_ont_4g007950	turquoise	0.274	0.548	0.411	0	-0.137	0.137	-0.274	-0.411	-0.548
Cs_ont_4g007990	turquoise	0.274	0.548	0.411	-0.548	0.137	0	-0.137	-0.411	-0.274
Cs_ont_4g008410	turquoise	0.274	0.548	0	-0.548	-0.411	-0.137	0.411	0.137	-0.274
Cs_ont_4g008440	turquoise	0.411	0.548	0.274	-0.137	0	0.137	-0.548	-0.411	-0.274
Cs_ont_4g008560	turquoise	0.548	0.411	0.274	0.137	-0.548	-0.137	0	-0.411	-0.274
Cs_ont_4g008940	turquoise	0.411	0.548	0.274	-0.137	0.137	0	-0.274	-0.548	-0.411
Cs_ont_4g009000	turquoise	0.548	0.411	0.274	-0.137	0.137	-0.274	0	-0.548	-0.411
Cs_ont_4g009210	turquoise	0.411	0.548	0.274	0.137	-0.137	0	-0.548	-0.274	-0.411
Cs_ont_4g009310	turquoise	0.274	0.411	0.548	-0.137	-0.548	-0.274	-0.411	0.137	0
Cs_ont_4g009320	turquoise	0.274	0.548	0.411	-0.548	-0.274	0	0.137	-0.137	-0.411
Cs_ont_4g009330	turquoise	0.411	0.548	0.274	-0.548	0.137	-0.411	0	-0.274	-0.137
Cs_ont_4g009340	turquoise	0.274	-0.137	0.411	-0.548	-0.274	-0.411	0.548	0.137	0
Cs_ont_4g009350	turquoise	0.411	0.548	0.274	-0.274	-0.548	-0.411	0.137	-0.137	0
Cs_ont_4g009390	turquoise	0.411	0.548	0.274	-0.274	0	0.137	-0.137	-0.548	-0.411
Cs_ont_4g009420	turquoise	0.411	0.548	0.274	-0.274	0	0.137	-0.137	-0.411	-0.548
Cs_ont_4g009680	turquoise	0.274	0.548	0.411	-0.548	-0.137	-0.274	0.137	0	-0.411
Cs_ont_4g009840	turquoise	0.411	0.274	0.548	-0.274	0.137	0	-0.137	-0.548	-0.411
Cs_ont_4g010130	turquoise	0.548	0.411	0.274	0	0.137	-0.548	-0.411	-0.274	-0.137
Cs_ont_4g010150	turquoise	0.274	0.411	0.137	-0.411	-0.548	-0.137	0	0.548	-0.274
Cs_ont_4g010210	turquoise	0.274	0.411	0.548	0.137	0	-0.411	-0.548	-0.137	-0.274
Cs_ont_4g010300	turquoise	0.411	0.274	0.548	-0.548	0.137	0	-0.137	-0.274	-0.411
Cs_ont_4g010390	turquoise	0.411	0.548	0.274	0	0.137	-0.137	-0.548	-0.411	-0.274
Cs_ont_4g010600	turquoise	0.275	0.413	0.55	-0.481	-0.275	-0.138	0.138	-0.481	0
Cs_ont_4g010640	turquoise	0.411	0.548	0.274	0	-0.548	0.137	-0.411	-0.137	-0.274
Cs_ont_4g011060	turquoise	0.411	0.548	0.274	-0.274	0.137	0	-0.548	-0.137	-0.411
Cs_ont_4g011380	turquoise	0.274	0.548	0.411	0	0.137	-0.137	-0.411	-0.274	-0.548
Cs_ont_4g011830	turquoise	0.411	0.548	0.274	-0.137	-0.274	0	0.137	-0.411	-0.548
Cs_ont_4g012160	turquoise	0.274	0.548	0.411	-0.137	-0.411	0.137	-0.274	0	-0.548
Cs_ont_4g012170	turquoise	0.55	0.413	0.275	-0.275	-0.138	0.138	0	-0.481	-0.481
Cs_ont_4g012330	turquoise	0.274	0.548	0.411	-0.137	0	0.137	-0.274	-0.548	-0.411
Cs_ont_4g012360	turquoise	0.411	0.548	0.274	0	0.137	-0.137	-0.411	-0.548	-0.274
Cs_ont_4g012400	turquoise	0.274	0.411	0.548	-0.274	0	-0.137	0.137	-0.548	-0.411
Cs_ont_4g012610	turquoise	0.548	0.411	0.274	0	-0.548	-0.137	0.137	-0.274	-0.411
Cs_ont_4g012710	turquoise	0.548	0.411	0.274	-0.137	0	-0.274	0.137	-0.548	-0.411
Cs_ont_4g012720	turquoise	0.548	0.274	0.137	-0.548	-0.411	-0.274	0.411	-0.137	0
Cs_ont_4g012770	turquoise	0.548	0.411	0.274	-0.548	-0.137	0	0.137	-0.411	-0.274
Cs_ont_4g012860	turquoise	0.274	0.137	0.411	0.548	0	-0.548	-0.411	-0.274	-0.137
Cs_ont_4g012930	turquoise	0.411	0.274	0.548	-0.274	-0.411	-0.137	-0.548	0	0.137
Cs_ont_4g013820	turquoise	0.274	0.548	0.411	-0.548	-0.411	-0.274	0.137	0	-0.137
Cs_ont_4g013830	turquoise	0.274	0.548	0.411	0.137	-0.274	0	-0.548	-0.137	-0.411
Cs_ont_4g014220	turquoise	0.411	0.548	0.274	0	-0.137	0.137	-0.274	-0.411	-0.548
Cs_ont_4g014230	turquoise	0.274	0.548	0.137	-0.411	-0.137	0	0.411	-0.548	-0.274
Cs_ont_4g014290	turquoise	0.274	0.548	0.411	-0.137	0	0.137	-0.548	-0.411	-0.274
Cs_ont_4g014370	turquoise	0.411	0.548	0.274	0	-0.137	-0.548	-0.274	-0.411	0.137
Cs_ont_4g014390	turquoise	0.411	0.548	0.274	-0.274	-0.137	0	0.137	-0.411	-0.548
Cs_ont_4g014420	turquoise	0.275	0.55	0.138	0.413	-0.55	-0.0688	-0.275	-0.413	-0.0688
Cs_ont_4g015150	turquoise	0.411	0.548	0.274	0	0.137	-0.274	-0.548	-0.411	-0.137
Cs_ont_4g015580	turquoise	0.411	0.548	0.274	-0.274	-0.137	0.137	0	-0.411	-0.548
Cs_ont_4g015610	turquoise	0.411	0.548	0.274	-0.274	-0.137	-0.548	0.137	-0.411	0
Cs_ont_4g015900	turquoise	0.548	0.411	0.274	-0.411	-0.548	0.137	-0.274	-0.137	0
Cs_ont_4g016190	turquoise	0.548	0.274	0.411	0	0.137	-0.137	-0.411	-0.548	-0.274
Cs_ont_4g016480	turquoise	0.548	0.411	0.274	-0.137	0.137	0	-0.548	-0.411	-0.274
Cs_ont_4g016600	turquoise	0.55	0.413	0.275	0.138	-0.275	-0.0688	-0.55	-0.413	-0.0688
Cs_ont_4g016690	turquoise	0.411	0.548	0.274	0.137	-0.137	-0.411	0	-0.548	-0.274
Cs_ont_4g017550	turquoise	0.411	0.274	0.548	0.137	-0.137	0	-0.548	-0.411	-0.274
Cs_ont_4g017610	turquoise	0.557	0.279	0.418	-0.418	0.139	-0.139	0	-0.418	-0.418
Cs_ont_4g017720	turquoise	0.411	0.548	0.274	0.137	-0.137	0	-0.274	-0.411	-0.548
Cs_ont_4g017750	turquoise	0.411	0.548	0.274	0.137	-0.548	-0.137	-0.274	0	-0.411
Cs_ont_4g017930	turquoise	0.548	0.274	0.411	-0.548	-0.411	-0.274	0.137	-0.137	0
Cs_ont_4g018330	turquoise	0.137	0	0.274	-0.274	-0.411	-0.548	-0.137	0.548	0.411
Cs_ont_4g018570	turquoise	0.411	0.548	0.274	-0.274	0	0.137	-0.137	-0.548	-0.411
Cs_ont_4g019550	turquoise	0.411	0.548	0	-0.137	0.137	0.274	-0.274	-0.411	-0.548
Cs_ont_4g019700	turquoise	0.411	0.548	0.274	-0.274	0	0.137	-0.137	-0.411	-0.548
Cs_ont_4g019760	turquoise	0.411	0.548	0.274	0.137	-0.274	0	-0.137	-0.411	-0.548
Cs_ont_4g019980	turquoise	0.411	0.548	0.274	-0.274	-0.137	0	0.137	-0.411	-0.548
Cs_ont_4g020400	turquoise	0.411	0.548	0.274	0	-0.274	-0.137	0.137	-0.548	-0.411
Cs_ont_4g020580	turquoise	0.411	0.548	0.274	-0.274	-0.137	0	0.137	-0.411	-0.548
Cs_ont_4g020660	turquoise	0.411	0.548	0.274	-0.274	0.137	-0.137	0	-0.411	-0.548
Cs_ont_4g020670	turquoise	0.411	0.548	0.274	-0.411	-0.137	0	0.137	-0.274	-0.548
Cs_ont_4g020780	turquoise	0.548	0.411	0.274	-0.548	-0.411	-0.137	-0.274	0.137	0
Cs_ont_4g021020	turquoise	0.274	0.548	0.411	-0.274	0	-0.137	0.137	-0.411	-0.548
Cs_ont_4g021620	turquoise	0.411	0.548	0.274	-0.137	0.137	0	-0.274	-0.411	-0.548
Cs_ont_4g021920	turquoise	0.411	0.548	0.274	-0.274	-0.137	0.137	0	-0.411	-0.548
Cs_ont_4g022030	turquoise	0.274	0.548	0.411	-0.137	0	0.137	-0.274	-0.411	-0.548
Cs_ont_4g022040	turquoise	0.411	0.274	0.548	-0.548	-0.137	-0.274	0.137	-0.411	0
Cs_ont_4g022220	turquoise	0.411	0.548	0.274	0	-0.274	-0.411	-0.137	-0.548	0.137
Cs_ont_4g022450	turquoise	0.411	0.548	0.274	0.137	0	-0.137	-0.548	-0.274	-0.411
Cs_ont_4g022580	turquoise	0.411	0.548	0.274	-0.274	-0.137	0	0.137	-0.411	-0.548
Cs_ont_4g022690	turquoise	0.548	0.274	0.411	-0.548	-0.137	0	0.137	-0.274	-0.411
Cs_ont_4g022770	turquoise	0.411	0.548	0.274	-0.274	0	-0.411	-0.137	-0.548	0.137
Cs_ont_4g022900	turquoise	0.274	0.548	0.411	-0.411	-0.274	0	0.137	-0.137	-0.548
Cs_ont_4g022990	turquoise	0.55	0.413	0.275	-0.275	0.138	-0.138	0	-0.481	-0.481
Cs_ont_4g023170	turquoise	0.411	0.274	0.548	-0.411	-0.137	-0.274	0.137	-0.548	0
Cs_ont_4g023200	turquoise	0.411	0.548	0.274	0.137	-0.137	0	-0.274	-0.548	-0.411
Cs_ont_4g023270	turquoise	0.411	0.548	0.274	-0.548	-0.411	-0.274	-0.137	0	0.137
Cs_ont_4g023280	turquoise	0.411	0.274	0.548	-0.548	-0.137	-0.411	-0.274	0	0.137
Cs_ont_4g023300	turquoise	0.411	0.274	0.548	-0.548	0	-0.274	0.137	-0.411	-0.137
Cs_ont_4g023310	turquoise	0.411	0.274	0.548	0	0.137	-0.137	-0.548	-0.411	-0.274
Cs_ont_4g023330	turquoise	0.274	0.548	0.411	0	-0.411	-0.548	-0.274	-0.137	0.137
Cs_ont_4g023380	turquoise	0.411	0.137	0.548	-0.137	0.274	0	-0.548	-0.274	-0.411
Cs_ont_4g023390	turquoise	0.411	0.274	0.548	-0.137	0.137	-0.274	0	-0.548	-0.411
Cs_ont_4g023420	turquoise	0.548	0.274	0.411	-0.548	-0.137	0	-0.274	0.137	-0.411
Cs_ont_4g023450	turquoise	0.548	0.411	0.274	-0.548	0	0.137	-0.137	-0.411	-0.274
Cs_ont_4g023670	turquoise	0.411	0.548	0.274	0.137	0	-0.274	-0.137	-0.548	-0.411
Cs_ont_4g023680	turquoise	0.411	0.548	0.274	-0.137	0	-0.411	-0.548	-0.274	0.137
Cs_ont_4g024570	turquoise	0.548	0.411	0.137	-0.548	-0.411	0	0.274	-0.137	-0.274
Cs_ont_4g024690	turquoise	0.548	0.411	0.274	-0.548	-0.274	0	0.137	-0.411	-0.137
Cs_ont_4g024900	turquoise	0.274	0.137	0.548	-0.137	0.411	0	-0.274	-0.548	-0.411
Cs_ont_4g025000	turquoise	0.411	0.548	0.274	-0.548	-0.274	0	-0.137	-0.411	0.137
Cs_ont_4g025030	turquoise	0.274	0.411	0.548	-0.548	-0.411	0	0.137	-0.137	-0.274
Cs_ont_4g025310	turquoise	0.411	0.548	0.274	-0.274	0.137	-0.137	0	-0.411	-0.548
Cs_ont_4g025470	turquoise	0.274	0.411	0.548	-0.137	-0.274	0.137	0	-0.411	-0.548
Cs_ont_4g025480	turquoise	0.411	0.274	0.548	-0.137	0.137	-0.274	0	-0.411	-0.548
Cs_ont_4g025640	turquoise	0.548	0.411	0.274	-0.274	-0.137	0	0.137	-0.548	-0.411
Cs_ont_4g025660	turquoise	0.411	0.274	0.548	-0.411	0.137	-0.137	-0.274	-0.548	0
Cs_ont_4g025770	turquoise	0.411	0.548	0.274	0	-0.137	-0.411	0.137	-0.548	-0.274
Cs_ont_4g025780	turquoise	0.411	0.548	0.137	0.274	-0.137	-0.274	-0.548	0	-0.411
Cs_ont_4g025830	turquoise	0.548	0.274	0.411	0	0.137	-0.137	-0.411	-0.274	-0.548
Cs_ont_4g025840	turquoise	0.411	0.548	0.274	-0.137	-0.548	-0.274	0.137	0	-0.411
Cs_ont_4g025940	turquoise	0.548	0.411	0.274	0.137	0	-0.137	-0.274	-0.548	-0.411
Cs_ont_4g025960	turquoise	0.274	0.411	0.137	-0.411	-0.137	-0.274	0.548	-0.548	0
Cs_ont_4g025970	turquoise	0.548	0.411	0.274	-0.548	-0.137	0	0.137	-0.274	-0.411
Cs_ont_4g026080	turquoise	0.548	0.411	0.274	-0.548	0	-0.137	0.137	-0.274	-0.411
Cs_ont_4g026150	turquoise	0.274	0.411	0.548	-0.548	-0.274	-0.137	-0.411	0.137	0
Cs_ont_4g026530	turquoise	0.411	0.274	0.548	-0.137	-0.411	-0.274	0.137	-0.548	0
Cs_ont_4g026920	turquoise	0.548	0.411	0.274	-0.137	0	0.137	-0.274	-0.411	-0.548
Cs_ont_4g027210	turquoise	0.548	0.411	0.137	-0.548	-0.411	-0.274	0	0.274	-0.137
Cs_ont_4g027290	turquoise	0.411	0.548	0.274	0.137	-0.137	0	-0.548	-0.274	-0.411
Cs_ont_4g027410	turquoise	0.411	0.548	0.274	0	0.137	-0.137	-0.548	-0.274	-0.411
Cs_ont_4g027470	turquoise	0.548	0.274	0.411	-0.548	-0.274	0	0.137	-0.411	-0.137
Cs_ont_4g027640	turquoise	0.411	0.548	0.274	-0.411	-0.137	0	0.137	-0.548	-0.274
Cs_ont_4g027680	turquoise	0.548	0.411	0.274	-0.137	0.137	0	-0.548	-0.274	-0.411
Cs_ont_4g028020	turquoise	0.411	0.274	0.137	-0.274	0	-0.137	0.548	-0.548	-0.411
Cs_ont_4g028080	turquoise	0.548	0.411	0.274	0.137	0	-0.137	-0.548	-0.411	-0.274
Cs_ont_4g028110	turquoise	0.274	0.548	0.411	-0.411	-0.548	-0.274	-0.137	0	0.137
Cs_ont_4g028120	turquoise	0.411	0.548	0.137	-0.274	-0.411	-0.548	-0.137	0	0.274
Cs_ont_4g028220	turquoise	0.274	0.548	0.411	0.137	0	-0.137	-0.548	-0.274	-0.411
Cs_ont_4g028360	turquoise	0.411	0.274	0.548	0	-0.274	-0.137	0.137	-0.411	-0.548
Cs_ont_4g028380	turquoise	0.548	0.274	0.411	-0.548	-0.137	0	0.137	-0.411	-0.274
Cs_ont_4g028390	turquoise	0.548	0.274	0.411	-0.137	0.137	0	-0.548	-0.411	-0.274
Cs_ont_4g028510	turquoise	0.411	0.548	0.137	0.274	-0.274	0	-0.548	-0.137	-0.411
Cs_ont_4g028580	turquoise	0.411	0.548	0.274	-0.137	0	0.137	-0.274	-0.411	-0.548
Cs_ont_5g000210	turquoise	0.274	0.548	0.411	0	0.137	-0.274	-0.137	-0.411	-0.548
Cs_ont_5g000330	turquoise	0.411	0.548	0.274	0	0.137	-0.137	-0.274	-0.411	-0.548
Cs_ont_5g000340	turquoise	0.411	0.548	0.274	-0.548	-0.274	0.137	0	-0.137	-0.411
Cs_ont_5g000350	turquoise	0.274	0.548	0.411	-0.548	-0.274	-0.411	0.137	0	-0.137
Cs_ont_5g000730	turquoise	0.274	0.411	0.548	0.137	-0.548	0	-0.411	-0.137	-0.274
Cs_ont_5g000750	turquoise	0.411	0.274	0.548	0.137	0	-0.137	-0.548	-0.411	-0.274
Cs_ont_5g000810	turquoise	0.411	0.548	0.274	0.137	-0.274	-0.411	-0.548	-0.137	0
Cs_ont_5g000820	turquoise	0.411	0.548	0.274	-0.137	0	0.137	-0.411	-0.274	-0.548
Cs_ont_5g001070	turquoise	0.274	0.137	0.411	-0.274	-0.137	0	0.548	-0.548	-0.411
Cs_ont_5g001120	turquoise	0.411	0.548	0.274	-0.137	0.137	0	-0.548	-0.274	-0.411
Cs_ont_5g001130	turquoise	0.275	0.413	0.55	-0.275	0.138	-0.413	-0.55	-0.0688	-0.0688
Cs_ont_5g001240	turquoise	0.274	0.548	0.411	-0.411	0.137	0	-0.548	-0.137	-0.274
Cs_ont_5g001460	turquoise	0.413	0.275	0.55	-0.413	0.138	-0.206	-0.206	0	-0.55
Cs_ont_5g001530	turquoise	0.274	0.411	0.548	-0.548	-0.274	-0.411	0.137	-0.137	0
Cs_ont_5g001740	turquoise	0.411	0.274	0.548	-0.137	0.137	0	-0.274	-0.411	-0.548
Cs_ont_5g001750	turquoise	0.548	0.274	0.411	-0.137	-0.274	0	0.137	-0.548	-0.411
Cs_ont_5g001770	turquoise	0.548	0.274	0.411	-0.274	0.137	-0.137	0	-0.548	-0.411
Cs_ont_5g002210	turquoise	0.411	0.274	0.548	-0.548	0.137	-0.411	0	-0.274	-0.137
Cs_ont_5g002400	turquoise	0.411	0.274	0.548	-0.411	0	-0.274	0.137	-0.548	-0.137
Cs_ont_5g002640	turquoise	0.411	0.548	0.274	0	0.137	-0.411	-0.548	-0.274	-0.137
Cs_ont_5g002780	turquoise	0.411	0.548	0.274	0.137	0	-0.137	-0.274	-0.548	-0.411
Cs_ont_5g003070	turquoise	0.274	0.411	0.548	-0.137	-0.548	0.137	0	-0.274	-0.411
Cs_ont_5g003140	turquoise	0.411	0.274	0.548	-0.274	0.137	0	-0.411	-0.137	-0.548
Cs_ont_5g003230	turquoise	0.411	0.548	0.274	-0.274	0	-0.137	0.137	-0.548	-0.411
Cs_ont_5g003310	turquoise	0.548	0.274	0.411	-0.411	0.137	-0.137	0	-0.548	-0.274
Cs_ont_5g003470	turquoise	0.411	0.137	0.274	-0.411	-0.548	0	0.548	-0.137	-0.274
Cs_ont_5g003620	turquoise	0.411	0.548	0.274	0.137	-0.548	-0.274	-0.411	-0.137	0
Cs_ont_5g003700	turquoise	0.548	0.411	0.274	-0.411	-0.137	0	0.137	-0.274	-0.548
Cs_ont_5g004670	turquoise	0.411	0.274	0.548	-0.548	0	-0.274	0.137	-0.411	-0.137
Cs_ont_5g004780	turquoise	0.548	0.274	0.411	0	0.137	-0.137	-0.548	-0.274	-0.411
Cs_ont_5g005010	turquoise	0.411	0.137	0.548	0.274	-0.274	0	-0.411	-0.137	-0.548
Cs_ont_5g005060	turquoise	0.411	0.548	0.274	-0.274	-0.548	-0.411	0.137	-0.137	0
Cs_ont_5g005260	turquoise	0.411	0.548	0.274	-0.411	-0.137	-0.274	0.137	-0.548	0
Cs_ont_5g005280	turquoise	0.274	0.411	0.548	-0.137	0	0.137	-0.548	-0.274	-0.411
Cs_ont_5g005300	turquoise	0.274	0.548	0.411	-0.274	0	-0.137	0.137	-0.548	-0.411
Cs_ont_5g005430	turquoise	0.274	0.411	0.137	-0.411	-0.137	-0.274	0.548	-0.548	0
Cs_ont_5g005870	turquoise	0.548	0.411	0.274	-0.274	-0.137	0	0.137	-0.548	-0.411
Cs_ont_5g006020	turquoise	0.411	0.548	0.274	0.137	-0.274	-0.137	-0.548	-0.411	0
Cs_ont_5g006030	turquoise	0.274	0.411	0.548	-0.137	0.137	-0.548	-0.274	-0.411	0
Cs_ont_5g006070	turquoise	0.411	0.548	0.274	-0.274	-0.137	0	0.137	-0.548	-0.411
Cs_ont_5g006080	turquoise	0.411	0.274	0.548	-0.411	-0.137	0	0.137	-0.274	-0.548
Cs_ont_5g006450	turquoise	0.548	0.411	0	-0.137	-0.548	-0.411	-0.274	0.137	0.274
Cs_ont_5g006770	turquoise	0.274	0.548	0.411	0	-0.274	-0.137	0.137	-0.548	-0.411
Cs_ont_5g007010	turquoise	0.411	0.274	0.548	-0.274	0	-0.137	0.137	-0.548	-0.411
Cs_ont_5g007120	turquoise	0.411	0.274	0.548	-0.548	-0.137	0	0.137	-0.411	-0.274
Cs_ont_5g007240	turquoise	0	0.548	0.274	-0.411	-0.548	-0.274	0.137	0.411	-0.137
Cs_ont_5g007260	turquoise	0.411	0.548	0.274	-0.274	0	0.137	-0.137	-0.411	-0.548
Cs_ont_5g007280	turquoise	0.548	0.137	0.411	-0.548	-0.411	-0.274	0.274	-0.137	0
Cs_ont_5g007360	turquoise	0.411	0.274	0.548	-0.137	0.137	0	-0.548	-0.274	-0.411
Cs_ont_5g007560	turquoise	0.548	0.411	0.274	-0.411	-0.548	-0.137	-0.274	0.137	0
Cs_ont_5g007620	turquoise	0.274	0.411	0.548	0	-0.137	0.137	-0.274	-0.548	-0.411
Cs_ont_5g007630	turquoise	0.411	0.548	0.274	-0.274	0	0.137	-0.137	-0.411	-0.548
Cs_ont_5g007840	turquoise	0.411	0.548	0.274	-0.411	0.137	-0.137	0	-0.548	-0.274
Cs_ont_5g008020	turquoise	0.411	0.274	0.548	-0.411	0.137	0	-0.137	-0.548	-0.274
Cs_ont_5g008120	turquoise	0.411	0.274	0.548	-0.274	0.137	-0.137	-0.411	0	-0.548
Cs_ont_5g008130	turquoise	0.548	0.411	0.274	0.137	-0.274	-0.411	-0.548	-0.137	0
Cs_ont_5g008510	turquoise	0.548	0.411	0.274	0.137	0	-0.274	-0.548	-0.137	-0.411
Cs_ont_5g008520	turquoise	0.548	0.274	0	0.411	-0.274	0.137	-0.411	-0.137	-0.548
Cs_ont_5g008590	turquoise	0.411	0.274	0.548	-0.274	0	-0.137	-0.548	0.137	-0.411
Cs_ont_5g008670	turquoise	0.411	0.548	0.274	-0.411	0	-0.137	0.137	-0.274	-0.548
Cs_ont_5g008820	turquoise	0.411	0.548	0.274	0.137	-0.274	-0.548	-0.411	-0.137	0
Cs_ont_5g009150	turquoise	0.411	0.548	0.274	-0.274	-0.548	-0.411	-0.137	0.137	0
Cs_ont_5g009180	turquoise	0.411	0.548	0.274	-0.137	0.137	0	-0.274	-0.548	-0.411
Cs_ont_5g009200	turquoise	0.411	0.548	0.274	-0.137	0.137	0	-0.274	-0.411	-0.548
Cs_ont_5g009300	turquoise	0.548	0.274	0.411	-0.548	-0.137	0	0.137	-0.274	-0.411
Cs_ont_5g009590	turquoise	0.411	0.548	0.274	0.137	0	-0.137	-0.548	-0.274	-0.411
Cs_ont_5g009630	turquoise	0.411	0.548	0.274	0	0.137	-0.137	-0.411	-0.548	-0.274
Cs_ont_5g010190	turquoise	0.411	0.548	0.274	0.137	0	-0.411	-0.548	-0.137	-0.274
Cs_ont_5g010200	turquoise	0.274	0.137	0.411	-0.548	-0.274	-0.137	0.548	-0.411	0
Cs_ont_5g010210	turquoise	0.411	0.548	0.274	-0.411	0	0.137	-0.137	-0.274	-0.548
Cs_ont_5g010230	turquoise	0.548	0.274	0.411	-0.411	-0.137	0	0.137	-0.274	-0.548
Cs_ont_5g010250	turquoise	0.411	0.274	0.548	-0.137	0	-0.274	0.137	-0.411	-0.548
Cs_ont_5g010270	turquoise	0.411	0.548	0.274	-0.274	0.137	0	-0.137	-0.548	-0.411
Cs_ont_5g010320	turquoise	0.274	0.411	0.548	-0.274	-0.137	0	0.137	-0.548	-0.411
Cs_ont_5g010360	turquoise	0.411	0.548	0.137	0.274	-0.137	0	-0.274	-0.411	-0.548
Cs_ont_5g010760	turquoise	0.274	0.411	0.548	-0.137	0.137	0	-0.274	-0.548	-0.411
Cs_ont_5g011280	turquoise	0.411	0.548	0.274	-0.548	0	-0.137	0.137	-0.274	-0.411
Cs_ont_5g011440	turquoise	0.274	0.548	0.411	-0.548	-0.411	-0.137	0.137	0	-0.274
Cs_ont_5g011450	turquoise	0.137	0.274	0.548	-0.548	-0.411	-0.274	0.411	0	-0.137
Cs_ont_5g011500	turquoise	0.548	0.274	0.411	-0.411	-0.548	-0.274	0.137	0	-0.137
Cs_ont_5g011760	turquoise	0.274	0.411	0.548	-0.137	-0.411	0	0.137	-0.548	-0.274
Cs_ont_5g012320	turquoise	0.548	0.411	0.274	-0.548	0	-0.411	0.137	-0.137	-0.274
Cs_ont_5g012510	turquoise	0.548	0.274	0.411	-0.548	-0.274	0	0.137	-0.137	-0.411
Cs_ont_5g012540	turquoise	0.411	0.548	0.274	-0.274	0	0.137	-0.137	-0.411	-0.548
Cs_ont_5g012610	turquoise	0.411	0.548	0.274	-0.137	-0.411	0.137	0	-0.274	-0.548
Cs_ont_5g012750	turquoise	0.411	0.548	0.274	0.137	-0.548	-0.411	0	-0.274	-0.137
Cs_ont_5g012940	turquoise	0.137	0.548	0.274	-0.548	-0.137	0	0.411	-0.411	-0.274
Cs_ont_5g012990	turquoise	0.274	0.548	0.411	0.137	0	-0.137	-0.548	-0.274	-0.411
Cs_ont_5g013010	turquoise	0.411	0.274	0.548	0.137	0	-0.137	-0.411	-0.274	-0.548
Cs_ont_5g013030	turquoise	0.411	0.274	0.548	-0.274	-0.548	-0.411	-0.137	0	0.137
Cs_ont_5g013180	turquoise	0.137	0	0.274	-0.274	0.411	0.548	-0.137	-0.411	-0.548
Cs_ont_5g013330	turquoise	0.413	0.55	0.275	-0.275	-0.0688	0.138	-0.0688	-0.55	-0.413
Cs_ont_5g013440	turquoise	0.548	0.274	0.411	-0.411	0	-0.137	0.137	-0.548	-0.274
Cs_ont_5g013450	turquoise	0.548	0.274	0.411	-0.411	0	-0.137	0.137	-0.548	-0.274
Cs_ont_5g013520	turquoise	0.274	0.411	0.548	-0.137	0.137	0	-0.274	-0.548	-0.411
Cs_ont_5g013670	turquoise	0.274	0.411	0.548	0	0.137	-0.137	-0.274	-0.411	-0.548
Cs_ont_5g013840	turquoise	0.55	0.275	0.413	-0.413	-0.0688	-0.0688	0.138	-0.275	-0.55
Cs_ont_5g013930	turquoise	0.411	0.274	0.548	-0.274	0.137	0	-0.411	-0.137	-0.548
Cs_ont_5g014190	turquoise	0.548	0.411	0.274	-0.411	-0.137	0	0.137	-0.548	-0.274
Cs_ont_5g014200	turquoise	0	0.274	0.411	-0.548	-0.411	-0.137	0.548	-0.274	0.137
Cs_ont_5g014260	turquoise	0.548	0.411	0.274	-0.274	-0.137	0	0.137	-0.548	-0.411
Cs_ont_5g014870	turquoise	0.411	0.274	0.548	0	0.137	-0.137	-0.548	-0.411	-0.274
Cs_ont_5g014970	turquoise	0.274	0.548	0.411	0.137	-0.548	-0.411	-0.274	0	-0.137
Cs_ont_5g014980	turquoise	0.548	0.274	0.411	-0.548	-0.411	0	0.137	-0.137	-0.274
Cs_ont_5g015350	turquoise	0.411	0.548	0.274	-0.274	-0.137	0	0.137	-0.548	-0.411
Cs_ont_5g015390	turquoise	0.274	0.548	0.411	-0.274	-0.137	-0.548	-0.411	0	0.137
Cs_ont_5g015510	turquoise	0.411	0.548	0.274	-0.274	-0.137	0.137	0	-0.411	-0.548
Cs_ont_5g015520	turquoise	0.411	0.548	0.274	0.137	-0.548	-0.137	0	-0.411	-0.274
Cs_ont_5g015580	turquoise	0.411	0.548	0.274	-0.411	0	0.137	-0.548	-0.137	-0.274
Cs_ont_5g015590	turquoise	0.548	0.411	0.274	0.137	-0.274	-0.137	-0.548	0	-0.411
Cs_ont_5g015630	turquoise	0.274	0.411	0.548	0	0.137	-0.274	-0.411	-0.137	-0.548
Cs_ont_5g015640	turquoise	0.274	0.411	0.548	0.137	0	-0.137	-0.548	-0.411	-0.274
Cs_ont_5g015980	turquoise	0.411	0.548	0.274	-0.548	-0.274	-0.411	0.137	0	-0.137
Cs_ont_5g016230	turquoise	0.411	0.548	0.137	0.274	-0.274	-0.411	-0.548	-0.137	0
Cs_ont_5g016380	turquoise	0.411	0.137	0.548	0	0.274	-0.137	-0.548	-0.411	-0.274
Cs_ont_5g016550	turquoise	0.411	0.548	0.274	-0.548	0.137	0	-0.137	-0.274	-0.411
Cs_ont_5g016560	turquoise	0.548	0.274	0.411	-0.548	0.137	0	-0.274	-0.411	-0.137
Cs_ont_5g016610	turquoise	0.411	0.274	0.548	-0.137	0.137	0	-0.274	-0.548	-0.411
Cs_ont_5g016710	turquoise	0.548	0.274	0.411	-0.411	0.137	-0.274	-0.548	0	-0.137
Cs_ont_5g016760	turquoise	0.411	0.548	0.274	-0.274	0	0.137	-0.137	-0.411	-0.548
Cs_ont_5g017090	turquoise	0.548	0.411	0.274	-0.137	0.137	0	-0.548	-0.274	-0.411
Cs_ont_5g017470	turquoise	0.411	0.548	0.274	-0.274	0	-0.411	-0.548	-0.137	0.137
Cs_ont_5g017570	turquoise	0.548	0.274	0.411	-0.548	-0.274	-0.411	0.137	0	-0.137
Cs_ont_5g018060	turquoise	0.411	0.274	0.548	-0.137	0.137	0	-0.274	-0.411	-0.548
Cs_ont_5g018580	turquoise	0.548	0.411	0.274	-0.411	-0.548	-0.137	0.137	-0.274	0
Cs_ont_5g018770	turquoise	0.548	0.411	0.274	-0.548	0.137	-0.137	-0.411	-0.274	0
Cs_ont_5g019070	turquoise	0.411	0.274	0.548	-0.548	-0.411	0	0.137	-0.274	-0.137
Cs_ont_5g019170	turquoise	0.411	0.548	0.274	0.137	0	-0.137	-0.548	-0.274	-0.411
Cs_ont_5g019350	turquoise	0.548	0.411	0.274	0.137	0	-0.411	-0.548	-0.137	-0.274
Cs_ont_5g019360	turquoise	0.411	0.548	0.274	0.137	-0.274	0	-0.411	-0.548	-0.137
Cs_ont_5g019570	turquoise	0.274	0.548	0.411	-0.274	0	0.137	-0.548	-0.137	-0.411
Cs_ont_5g020010	turquoise	0.137	0	0.411	-0.548	-0.411	-0.274	0.548	0.274	-0.137
Cs_ont_5g020020	turquoise	0.548	0.137	0.411	-0.274	-0.137	0.274	-0.411	0	-0.548
Cs_ont_5g020590	turquoise	0.548	0.411	0.274	-0.137	-0.548	-0.411	-0.274	0	0.137
Cs_ont_5g020600	turquoise	0.411	0.548	0.274	0.137	0	-0.137	-0.548	-0.411	-0.274
Cs_ont_5g020790	turquoise	0.411	0.274	0.548	-0.411	0.137	-0.137	-0.548	-0.274	0
Cs_ont_5g021070	turquoise	0.411	0.548	0.274	-0.137	0.137	0	-0.274	-0.411	-0.548
Cs_ont_5g021080	turquoise	0.411	0.548	0.274	-0.137	-0.274	0	0.137	-0.411	-0.548
Cs_ont_5g021090	turquoise	0.411	0.274	0.548	0.137	0	-0.137	-0.548	-0.411	-0.274
Cs_ont_5g021190	turquoise	0.45	0.6	0.3	-0.3	0.15	-0.3	-0.3	-0.3	-0.3
Cs_ont_5g021340	turquoise	0.411	0.548	0.274	-0.137	0.137	0	-0.274	-0.411	-0.548
Cs_ont_5g021590	turquoise	0.137	0.411	0.548	-0.274	0.274	-0.548	-0.137	-0.411	0
Cs_ont_5g021600	turquoise	0.137	0.411	0.548	-0.548	0.274	-0.274	0	-0.137	-0.411
Cs_ont_5g021660	turquoise	0.137	0.411	0.548	-0.274	0.274	-0.411	0	-0.548	-0.137
Cs_ont_5g022090	turquoise	0.548	0.274	0.411	-0.548	-0.411	-0.137	0.137	-0.274	0
Cs_ont_5g022980	turquoise	0.137	0.548	0.274	-0.137	-0.274	-0.548	-0.411	0	0.411
Cs_ont_5g023300	turquoise	0.411	0.548	0.274	0.137	-0.411	-0.274	0	-0.137	-0.548
Cs_ont_5g023360	turquoise	0.411	0.274	0.548	0.137	0	-0.137	-0.548	-0.274	-0.411
Cs_ont_5g023830	turquoise	0.411	0.548	0.274	0	-0.137	0.137	-0.548	-0.411	-0.274
Cs_ont_5g024460	turquoise	0.274	0.411	0.548	0.137	-0.411	0	-0.137	-0.548	-0.274
Cs_ont_5g024520	turquoise	0.411	0.274	0.548	-0.548	-0.137	0.137	0	-0.274	-0.411
Cs_ont_5g024650	turquoise	0.411	0.548	0.137	0	-0.274	0.274	-0.137	-0.411	-0.548
Cs_ont_5g024890	turquoise	0.411	0.274	0.548	0.137	-0.137	0	-0.548	-0.411	-0.274
Cs_ont_5g024910	turquoise	0.411	0.548	0.137	0.274	0	-0.137	-0.274	-0.411	-0.548
Cs_ont_5g024930	turquoise	0.411	0.548	0.274	0.137	0	-0.274	-0.411	-0.548	-0.137
Cs_ont_5g025060	turquoise	0.411	0.548	0.274	0	-0.411	-0.548	-0.137	0.137	-0.274
Cs_ont_5g025090	turquoise	0.411	0.548	0.274	0.137	-0.274	0	-0.411	-0.548	-0.137
Cs_ont_5g025110	turquoise	0.274	0.548	0.411	0	-0.137	-0.411	-0.548	-0.274	0.137
Cs_ont_5g025270	turquoise	0.548	0.274	0.411	-0.274	-0.137	-0.411	0	-0.548	0.137
Cs_ont_5g025620	turquoise	0.286	0.572	0.429	0	0.143	-0.358	-0.358	-0.358	-0.358
Cs_ont_5g025840	turquoise	0.411	0.548	0.274	-0.274	-0.411	-0.548	0.137	-0.137	0
Cs_ont_5g025980	turquoise	0.275	0.55	0.413	0	-0.481	-0.138	-0.481	0.138	-0.275
Cs_ont_5g026080	turquoise	0.411	0.548	0.274	-0.411	-0.137	-0.548	0	-0.274	0.137
Cs_ont_5g026330	turquoise	0.411	0.548	0.274	0.137	-0.274	0	-0.137	-0.548	-0.411
Cs_ont_5g026340	turquoise	0.411	0.548	0.274	0.137	0	-0.137	-0.548	-0.274	-0.411
Cs_ont_5g026540	turquoise	0.548	0.411	0.274	0.137	-0.137	-0.411	-0.548	-0.274	0
Cs_ont_5g026620	turquoise	0.274	0.548	0.411	0	0.137	-0.137	-0.548	-0.411	-0.274
Cs_ont_5g026740	turquoise	0.274	0.411	0.548	-0.137	0.137	0	-0.411	-0.274	-0.548
Cs_ont_5g027790	turquoise	0.411	0.548	0.274	0.137	-0.411	0	-0.137	-0.548	-0.274
Cs_ont_5g027970	turquoise	0.411	0.274	0.548	-0.411	0	0.137	-0.137	-0.274	-0.548
Cs_ont_5g028030	turquoise	0.411	0.548	0.274	0.137	-0.411	-0.548	0	-0.274	-0.137
Cs_ont_5g028040	turquoise	0.411	0.548	0.274	-0.411	0	0.137	-0.274	-0.137	-0.548
Cs_ont_5g028060	turquoise	0.45	0.3	0.6	0.15	-0.3	-0.3	-0.3	-0.3	-0.3
Cs_ont_5g028090	turquoise	0.274	0.137	0.548	-0.137	0.411	0	-0.548	-0.411	-0.274
Cs_ont_5g028540	turquoise	0.411	0.548	0.274	0	-0.274	-0.137	0.137	-0.411	-0.548
Cs_ont_5g028550	turquoise	0.411	0.274	0.548	-0.274	0.137	0	-0.137	-0.411	-0.548
Cs_ont_5g028940	turquoise	0.411	0.548	0.274	0	-0.411	-0.274	0.137	-0.548	-0.137
Cs_ont_5g029020	turquoise	0.548	0.274	0.411	-0.548	-0.274	0	0.137	-0.411	-0.137
Cs_ont_5g029120	turquoise	0.411	0.274	0.137	-0.548	-0.137	0	0.548	-0.411	-0.274
[truncated: 4,074 more rows]

## Sheet: Table S7
Table S7 DEGs in the yellow and turquoise modules had a positive relationship with C17_1.
Gene id	Gene name	Module	C17_1_1	C17_1_2	C17_1_3	C17_4_1	C17_4_2	C17_4_3	C17_7_1	C17_7_2	C17_7_3
Cs_ont_8g007110	ADT, PDT	yellow	0.274	-0.137	0.548	0	0.411	0.137	-0.548	-0.411	-0.274
Cs_ont_5g001740	aroA	turquoise	0.411	0.274	0.548	-0.137	0.137	0	-0.274	-0.411	-0.548
Cs_ont_1g028510	aroB	/	/	/	/	/	/	/	/	/	/
Cs_ont_3g017540	aroDE	turquoise	0.274	0.137	0.548	-0.137	0.411	0	-0.274	-0.548	-0.411
Cs_ont_5g009120	aroDE	yellow	0.137	-0.137	0	0.274	0.548	0.411	-0.548	-0.274	-0.411
Cs_ont_9g003710	aroDE	turquoise	0.411	0.274	0.548	0	0.137	-0.137	-0.548	-0.411	-0.274
Cs_ont_1g021460	aroF/G/H	yellow	0.274	0.137	0.548	0	0.411	-0.137	-0.548	-0.411	-0.274
Cs_ont_3g011210	aroF/G/H	yellow	0.411	0.274	0.548	0	0.137	-0.137	-0.411	-0.548	-0.274
Cs_ont_1g002190	aroK, aroL	turquoise	0.411	0.274	0.548	0	0.137	-0.137	-0.548	-0.411	-0.274
Cs_ont_1g000160	DDC/TyDC	turquoise	0.414	0.276	0.552	-0.207	0.138	0	-0.483	-0.483	-0.207
Cs_ont_2g020700	DDC/TyDC	turquoise	0.274	0.411	0.548	-0.411	0.137	-0.274	0	-0.548	-0.137
Cs_ont_3g005820	DDC/TyDC	blue	-0.548	-0.274	-0.137	0.411	0.548	0.274	-0.411	0	0.137
Cs_ont_7g015990	DDC/TyDC	turquoise	0.411	0.274	0.548	-0.411	0.137	0	-0.137	-0.548	-0.274
Cs_ont_1g000140	DDC/TyDC	/	/	/	/	/	/	/	/	/	/
Cs_ont_1g000110	DDC/TyDC	/	/	/	/	/	/	/	/	/	/
Cs_ont_1g003410	DDC/TyDC	/	/	/	/	/	/	/	/	/	/
Cs_ont_5g001720	tktA, tktB	/	/	/	/	/	/	/	/	/	/
Cs_ont_5g037680	ENO	turquoise	0.411	0.274	0.548	-0.137	0.137	0	-0.274	-0.548	-0.411
Cs_ont_9g024260	ENO	turquoise	0.548	0.411	0.137	-0.548	-0.274	0	0.274	-0.137	-0.411
Cs_ont_4g003990	GOT1	red	0	-0.274	-0.548	-0.137	-0.411	0.137	0.548	0.274	0.411
Cs_ont_6g013390	GOT2	green	-0.274	-0.411	0.137	0.411	0.548	-0.137	0.274	-0.548	0
Cs_ont_2g022750	TAT	turquoise	0.548	0.411	0.274	0.137	-0.274	-0.411	-0.137	-0.548	0
Cs_ont_4g013970	TAT	brown	-0.0688	-0.0688	-0.413	-0.275	-0.55	0.138	0.55	0.413	0.275
Cs_ont_4g024260	TYRAAT	yellow	0.137	-0.137	0.274	0.411	0.548	0	-0.411	-0.548	-0.274
Cs_ont_7g002300	TYRAAT	turquoise	0.274	0.548	0.411	-0.274	-0.137	-0.548	-0.411	0	0.137

## Sheet: Table S8
Table S8 The primers specific to the differentially expressed genes.
Gene name	Primer name	Sequences (5' to 3')
β-actinF	β-actinF	CCAAGCAGCATGAAGATCAA
β-actinR	β-actinR	ATCTGCTGGAAGGTGCTGA
AroG/F/H	Cs_ont_3g011210F	TCCTGTAGAATGGCCCGAGT
	Cs_ont_3g011210R	ATCCACCAAACACACGACAC
ENO	Cs_ont_5g037680F	CTACCGCCAGACCCTTGTTT
	Cs_ont_5g037680R	TGGCCTTCACTGACTTCACC
aroA	Cs_ont_5g001740R	TCGGATTCTTCTTCTCGC
	Cs_ont_5g001740F	AGTCAAAGGACGCATAGC
TyDC2	Cs_ont_1g000160F	ACTGCTGGCTTTCTTGGTGA
	Cs_ont_1g000160R	CCAGAGTGCAAACGAGGGAT
TyDC3	Cs_ont_2g020700F	AATTAGCCGGCGTTTCTCCA
	Cs_ont_2g020700R	ACCCAAATGCCGTACTCGTT
TyDC1	Cs_ont_7g015990F	GTCAGCTCGGTTGACTGACA
	Cs_ont_7g015990R	GCCAGTTAAAGCCAACCACG
